# Supplementary material
Source: PubMed Central journal article supplement (PMC3748378)
Supplement: NIHMS473343-supplement-01.pdf [file NIHMS473343-supplement-01.pdf]

Type of file: table

Label: 1

Filename: AOG203121-13-31R1 Appendix 1 (3-22-13v1) clean.pdf

## Appendix 1. Clinical Characteristics of Samples

| <b>Term cases</b>             |          |           |                                                                     |
|-------------------------------|----------|-----------|---------------------------------------------------------------------|
| Maternal age                  | GA weeks | Fetal sex | Indication for Cesarean delivery                                    |
| 28                            | 37       | M         | Elective repeat CD                                                  |
| 29                            | 37       | F         | Abdominal cerclage                                                  |
| 29                            | 39       | M         | Previous myomectomy                                                 |
| 29                            | 39       | F         | Elective repeat CD                                                  |
| 36                            | 39       | M         | Elective repeat CD                                                  |
| 37                            | 39       | F         | Elective repeat CD                                                  |
| 38                            | 37       | M         | Breech presentation                                                 |
| 39                            | 37       | M         | Elective repeat CD                                                  |
| <b>Second trimester cases</b> |          |           |                                                                     |
| Maternal age                  | GA weeks | Fetal sex | Indication for amniocentesis                                        |
| 33                            | 19       | M         | High risk serum screening result                                    |
| 36                            | 19       | F         | Advanced Maternal age                                               |
| 36                            | 17       | M         | Advanced maternal age                                               |
| 38                            | 17       | M         | High risk serum screening result                                    |
| 38                            | 16       | M         | Advanced maternal age                                               |
| 38                            | 15       | F         | High risk serum screening result                                    |
| 41                            | 18       | F         | Advanced Maternal age                                               |
| 42                            | 16       | M         | Advanced maternal age; sonographic soft marker (mild hydronephosis) |

CD, Cesarean delivery; F, female; GA, gestational age; M, male

Hui L, Wick HC, Edlow AG, Cowan JM, Bianchi DJW. Global gene expression analysis of term amniotic fluid cell-free fetal RNA *Obstet Gynecol* 2013;121.

The authors provided this information as a supplement to their article.

Type of file: table

Label: 2

Filename: AOG203121-13-31R1 Appendix 2 (3-22-13v1) clean.pdf

## Appendix 2. Significantly Differentially Regulated Genes in Term Compared With Second Trimester Amniotic Fluid Supernatant

| Fold Change in term vs second trimester Amniotic Fluid | Affymetrix Probe ID | Duplicate probes | Symbol       | Entrez Gene Name                                      |
|--------------------------------------------------------|---------------------|------------------|--------------|-------------------------------------------------------|
| 1019.9                                                 | 217059_at           | D                | MUC7         | mucin 7, secreted                                     |
| 424.5                                                  | 211735_x_at         | D                | SFTPC        | surfactant protein C                                  |
| 416.2                                                  | 206835_at           |                  | STATH        | statherin                                             |
| 363.4                                                  | 214387_x_at         | D                | SFTPC        | surfactant protein C                                  |
| 295.5                                                  | 205982_x_at         | D                | SFTPC        | surfactant protein C                                  |
| 288.7                                                  | 1553454_at          |                  | RPTN         | repetin                                               |
| 251.3                                                  | 204124_at           |                  | SLC34A2      | solute carrier family 34 (sodium phosphate), member 2 |
| 238.9                                                  | 206786_at           |                  | HTN3         | histatin 3                                            |
| 161.5                                                  | 220191_at           |                  | GKN1         | gastrokine 1                                          |
| 152.7                                                  | 223678_s_at         | D                | SFTPA2       | surfactant protein A2                                 |
| 130.9                                                  | 207430_s_at         | D                | MSMB         | microseminoprotein, beta-                             |
| 99.0                                                   | 214199_at           |                  | SFTPD        | surfactant protein D                                  |
| 96.5                                                   | 210982_s_at         | D                | HLA-DRA      | major histocompatibility complex, class II, DR alpha  |
| 96.5                                                   | 221133_s_at         | D                | CLDN18       | claudin 18                                            |
| 94.4                                                   | 238222_at           |                  | GKN2         | gastrokine 2                                          |
| 93.7                                                   | 1557961_s_at        | D                | LOC100127983 | uncharacterized LOC100127983                          |
| 93.1                                                   | 229584_at           |                  | LRRK2        | leucine-rich repeat kinase 2                          |
| 88.6                                                   | 242042_s_at         | D                | HOXD-AS1     | HOXD cluster antisense RNA 1 (non-protein coding)     |
| 86.0                                                   | 205569_at           |                  | LAMP3        | lysosomal-associated membrane protein 3               |
| 85.4                                                   | 232698_at           |                  | BPIFB2       | BPI fold containing family B, member 2                |
| 84.4                                                   | 205979_at           |                  | SCGB2A1      | secretoglobin, family 2A, member 1                    |
| 84.3                                                   | 230469_at           |                  | RTKN2        | rhotekin 2                                            |
| 82.2                                                   | 204130_at           |                  | HSD11B2      | hydroxysteroid (11-beta) dehydrogenase 2              |
| 81.9                                                   | 222242_s_at         |                  | KLK5         | kallikrein-related peptidase 5                        |
| 77.0                                                   | 237281_at           |                  | AKAP14       | A kinase (PRKA) anchor protein 14                     |
| 76.7                                                   | 1553602_at          |                  | MUCL1        | mucin-like 1                                          |
| 76.3                                                   | 216359_at           | D                | MUC7         | mucin 7, secreted                                     |
| 72.7                                                   | 222073_at           | D                | COL4A3       | collagen, type IV, alpha 3 (Goodpasture antigen)      |
| 71.1                                                   | 206639_x_at         |                  | HTN1         | histatin 1                                            |
| 69.8                                                   | 223253_at           |                  | EPDR1        | ependymin related protein 1 (zebrafish)               |
| 69.0                                                   | 208894_at           | D                | HLA-DRA      | major histocompatibility complex, class II, DR alpha  |
| 67.7                                                   | 208004_at           |                  | PROL1        | proline rich, lacrimal 1                              |
| 65.8                                                   | 226228_at           | D                | AQP4         | aquaporin 4                                           |
| 65.2                                                   | 232578_at           | D                | CLDN18       | claudin 18                                            |
| 63.2                                                   | 220026_at           |                  | CLCA4        | chloride channel accessory 4                          |
| 62.6                                                   | 219949_at           |                  | LRRC2        | leucine rich repeat containing 2                      |
| 61.4                                                   | 233305_at           |                  | NECAB1       | N-terminal EF-hand calcium binding protein 1          |
| 57.3                                                   | 218835_at           | D                | SFTPA2       | surfactant protein A2                                 |
| 56.7                                                   | 213006_at           |                  | CEBPD        | CCAAT/enhancer binding protein (C/EBP), delta         |

Hui L, Wick HC, Edlow AG, Cowan JM, Bianchi DJW. Global gene expression analysis of term amniotic fluid cell-free fetal RNA *Obstet Gynecol* 2013;121.

The authors provided this information as a supplement to their article.

© Copyright 2013 American College of Obstetricians and Gynecologists.

|      |              |   |                              |                                                                                                  |
|------|--------------|---|------------------------------|--------------------------------------------------------------------------------------------------|
| 56.5 | 37512_at     | D | HSD17B6                      | hydroxysteroid (17-beta) dehydrogenase 6 homolog (mouse)                                         |
| 55.7 | 239770_at    |   | ESYT3                        | extended synaptotagmin-like protein 3                                                            |
| 54.2 | 236331_at    | D | CDKL2                        | cyclin-dependent kinase-like 2 (CDC2-related kinase)                                             |
| 53.4 | 214641_at    | D | COL4A3                       | collagen, type IV, alpha 3 (Goodpasture antigen)                                                 |
| 51.7 | 209597_s_at  |   | PNMA2                        | paraneoplastic Ma antigen 2                                                                      |
| 49.6 | 210066_s_at  | D | AQP4                         | aquaporin 4                                                                                      |
| 49.2 | 38691_s_at   | D | SFTPC                        | surfactant protein C                                                                             |
| 47.5 | 211506_s_at  | D | IL8                          | interleukin 8                                                                                    |
| 46.2 | 225575_at    | D | LIFR                         | leukemia inhibitory factor receptor alpha                                                        |
| 45.7 | 236646_at    |   | C12orf59                     | chromosome 12 open reading frame 59                                                              |
| 45.5 | 211498_s_at  | D | NKX3-1                       | NK3 homeobox 1                                                                                   |
| 44.3 | 216184_s_at  | D | RIMS1                        | regulating synaptic membrane exocytosis 1                                                        |
| 43.8 | 235514_at    |   | ASPRV1                       | aspartic peptidase, retroviral-like 1                                                            |
| 40.2 | 202859_x_at  | D | IL8                          | interleukin 8                                                                                    |
| 39.5 | 231771_at    |   | GJB6                         | gap junction protein, beta 6, 30kDa                                                              |
| 39.4 | 243938_x_at  |   | DNAH5                        | dynein, axonemal, heavy chain 5                                                                  |
| 39.1 | 243650_at    |   | PLEKHH2                      | pleckstrin homology domain containing, family H (with MyTH4 domain) member 2                     |
| 39.0 | 231058_at    |   | FXYD4                        | FXYD domain containing ion transport regulator 4                                                 |
| 38.8 | 231461_at    |   | KRT71                        | keratin 71                                                                                       |
| 38.7 | 223278_at    |   | GJB2                         | gap junction protein, beta 2, 26kDa                                                              |
| 38.3 | 222121_at    | D | ARHGEF26                     | Rho guanine nucleotide exchange factor (GEF) 26                                                  |
| 37.8 | 237732_at    |   | PRR9                         | proline rich 9                                                                                   |
| 37.3 | 222333_at    |   | ALS2CL                       | ALS2 C-terminal like                                                                             |
| 37.2 | 205778_at    | D | KLK7                         | kallikrein-related peptidase 7                                                                   |
| 37.2 | 213142_x_at  | D | PION                         | pigeon homolog (Drosophila)                                                                      |
| 37.0 | 212063_at    | D | CD44 (includes EG:100330801) | CD44 molecule (Indian blood group)                                                               |
| 36.9 | 219554_at    |   | RHCG                         | Rh family, C glycoprotein                                                                        |
| 36.9 | 228601_at    | D | HOXD-AS1                     | HOXD cluster antisense RNA 1 (non-protein coding)                                                |
| 36.5 | 219735_s_at  | D | TFCP2L1                      | transcription factor CP2-like 1                                                                  |
| 35.5 | 230493_at    |   | SHISA2                       | shisa homolog 2 (Xenopus laevis)                                                                 |
| 34.6 | 213975_s_at  | D | LYZ                          | lysozyme                                                                                         |
| 34.1 | 1553722_s_at | D | RNF152                       | ring finger protein 152                                                                          |
| 33.9 | 214240_at    |   | GAL                          | galanin prepropeptide                                                                            |
| 33.5 | 207569_at    |   | ROS1                         | c-ros oncogene 1, receptor tyrosine kinase                                                       |
| 33.2 | 210096_at    |   | CYP4B1                       | cytochrome P450, family 4, subfamily B, polypeptide 1                                            |
| 33.2 | 1556325_at   | D | FILIP1                       | filamin A interacting protein 1                                                                  |
| 33.2 | 226534_at    |   | KITLG                        | KIT ligand                                                                                       |
| 33.1 | 237120_at    |   | KRT77                        | keratin 77                                                                                       |
| 33.0 | 212256_at    | D | GALNT10                      | UDP-N-acetyl-alpha-D-galactosamine:polypeptide N-acetylgalactosaminyltransferase 10 (GalNAc-T10) |
| 32.9 | 236320_at    |   | CCDC17                       | coiled-coil domain containing 17                                                                 |
| 32.6 | 214602_at    | D | COL4A4                       | collagen, type IV, alpha 4                                                                       |
| 32.4 | 237466_s_at  | D | HHIP                         | hedgehog interacting protein                                                                     |
| 32.0 | 238383_at    | D | C6orf58                      | chromosome 6 open reading frame 58                                                               |

Hui L, Wick HC, Edlow AG, Cowan JM, Bianchi DJW. Global gene expression analysis of term amniotic fluid cell-free fetal RNA *Obstet Gynecol* 2013;121.

The authors provided this information as a supplement to their article.

© Copyright 2013 American College of Obstetricians and Gynecologists.

|      |              |   |                           |                                                                                 |
|------|--------------|---|---------------------------|---------------------------------------------------------------------------------|
| 31.8 | 209395_at    |   | CHI3L1                    | chitinase 3-like 1 (cartilage glycoprotein-39)                                  |
| 31.8 | 209047_at    | D | AQP1                      | aquaporin 1 (Colton blood group)                                                |
| 31.5 | 238332_at    |   | ANKRD29                   | ankyrin repeat domain 29                                                        |
| 31.2 | 1552620_at   |   | SPRR4                     | small proline-rich protein 4                                                    |
| 30.7 | 205700_at    | D | HSD17B6                   | hydroxysteroid (17-beta) dehydrogenase 6 homolog (mouse)                        |
| 30.6 | 209706_at    | D | NKX3-1                    | NK3 homeobox 1                                                                  |
| 30.4 | 204846_at    | D | CP                        | ceruloplasmin (ferroxidase)                                                     |
| 30.2 | 210067_at    | D | AQP4                      | aquaporin 4                                                                     |
| 30.0 | 204924_at    |   | TLR2                      | toll-like receptor 2                                                            |
| 29.8 | 229759_s_at  | D | VEPH1                     | ventricular zone expressed PH domain homolog 1 (zebrafish)                      |
| 29.7 | 210297_s_at  | D | MSMB                      | microseminoprotein, beta-                                                       |
| 29.1 | 1555745_a_at | D | LYZ                       | lysozyme                                                                        |
| 29.0 | 224414_s_at  |   | CARD6                     | caspase recruitment domain family, member 6                                     |
| 28.7 | 229152_at    |   | FDCSP                     | follicular dendritic cell secreted protein                                      |
| 28.7 | 1565034_s_at | D | MLL                       | myeloid/lymphoid or mixed-lineage leukemia (trithorax homolog, Drosophila)      |
| 28.6 | 215692_s_at  | D | MPPED2                    | metallophosphoesterase domain containing 2                                      |
| 28.1 | 220407_s_at  | D | TGFB2                     | transforming growth factor, beta 2                                              |
| 27.9 | 225987_at    | D | STEAP4                    | STEAP family member 4                                                           |
| 27.6 | 39402_at     | D | IL1B                      | interleukin 1, beta                                                             |
| 26.9 | 1568879_a_at | D | LAMA3                     | laminin, alpha 3                                                                |
| 26.8 | 1570515_a_at | D | FILIP1                    | filamin A interacting protein 1                                                 |
| 26.8 | 231986_at    | D | RIMS1                     | regulating synaptic membrane exocytosis 1                                       |
| 26.8 | 224540_at    |   | LACRT                     | lacritin                                                                        |
| 26.5 | 215034_s_at  | D | TM4SF1                    | transmembrane 4 L six family member 1                                           |
| 26.3 | 210081_at    | D | AGER                      | advanced glycosylation end product-specific receptor                            |
| 25.4 | 216402_at    |   | SEC14L4                   | SEC14-like 4 (S. cerevisiae)                                                    |
| 25.3 | 204754_at    | D | HLF                       | hepatic leukemia factor                                                         |
| 25.2 | 203400_s_at  | D | TF                        | transferrin                                                                     |
| 24.9 | 213831_at    | D | HLA-DQA1                  | major histocompatibility complex, class II, DQ alpha 1                          |
| 24.5 | 204755_x_at  | D | HLF                       | hepatic leukemia factor                                                         |
| 24.3 | 207910_at    |   | SCGB1D1                   | secretoglobin, family 1D, member 1                                              |
| 24.2 | 226364_at    | D | HIP1 (includes EG:176224) | huntingtin interacting protein 1                                                |
| 24.2 | 212951_at    | D | GPR116                    | G protein-coupled receptor 116                                                  |
| 23.6 | 223775_at    | D | HHIP                      | hedgehog interacting protein                                                    |
| 23.5 | 207802_at    |   | CRISP3                    | cysteine-rich secretory protein 3                                               |
| 23.3 | 242945_at    | D | FAM20A                    | family with sequence similarity 20, member A                                    |
| 23.1 | 206004_at    |   | TGM3                      | transglutaminase 3 (E polypeptide, protein-glutamine-gamma-glutamyltransferase) |
| 22.8 | 205421_at    |   | SLC22A3                   | solute carrier family 22 (extraneuronal monoamine transporter), member 3        |
| 22.7 | 214063_s_at  | D | TF                        | transferrin                                                                     |
| 22.7 | 218711_s_at  | D | SDPR                      | serum deprivation response                                                      |
| 22.5 | 213611_at    |   | AQP5                      | aquaporin 5                                                                     |
| 22.4 | 1558034_s_at | D | CP                        | ceruloplasmin (ferroxidase)                                                     |

Hui L, Wick HC, Edlow AG, Cowan JM, Bianchi DJW. Global gene expression analysis of term amniotic fluid cell-free fetal RNA Obstet Gynecol 2013;121.

The authors provided this information as a supplement to their article.

© Copyright 2013 American College of Obstetricians and Gynecologists.

|      |             |   |                              |                                                                             |
|------|-------------|---|------------------------------|-----------------------------------------------------------------------------|
| 22.3 | 210942_s_at |   | ST3GAL6                      | ST3 beta-galactoside alpha-2,3-sialyltransferase 6                          |
| 22.3 | 225855_at   | D | EPB41L5                      | erythrocyte membrane protein band 4.1 like 5                                |
| 22.2 | 231733_at   |   | CARD18                       | caspase recruitment domain family, member 18                                |
| 22.1 | 204735_at   |   | PDE4A                        | phosphodiesterase 4A, cAMP-specific                                         |
| 21.7 | 224480_s_at |   | AGPAT9                       | 1-acylglycerol-3-phosphate O-acyltransferase 9                              |
| 21.6 | 210192_at   | D | ATP8A1                       | ATPase, aminophospholipid transporter (APLT), class I, type 8A, member 1    |
| 21.5 | 221019_s_at |   | COLEC12                      | collectin sub-family member 12                                              |
| 21.4 | 236741_at   | D | WDR72                        | WD repeat domain 72                                                         |
| 21.2 | 222719_s_at |   | PDGFC                        | platelet derived growth factor C                                            |
| 21.2 | 205626_s_at | D | CALB1                        | calbindin 1, 28kDa                                                          |
| 21.1 | 228933_at   |   | NHS                          | Nance-Horan syndrome (congenital cataracts and dental anomalies)            |
| 20.7 | 204489_s_at | D | CD44 (includes EG:100330801) | CD44 molecule (Indian blood group)                                          |
| 20.6 | 239182_at   | D | HOXD-AS1                     | HOXD cluster antisense RNA 1 (non-protein coding)                           |
| 20.5 | 210403_s_at |   | KCNJ1                        | potassium inwardly-rectifying channel, subfamily J, member 1                |
| 20.5 | 1558846_at  |   | PNLIPRP3                     | pancreatic lipase-related protein 3                                         |
| 20.5 | 241981_at   | D | FAM20A                       | family with sequence similarity 20, member A                                |
| 20.5 | 209387_s_at | D | TM4SF1                       | transmembrane 4 L six family member 1                                       |
| 20.3 | 1557136_at  |   | ATP13A4                      | ATPase type 13A4                                                            |
| 20.2 | 207336_at   | D | SOX5                         | SRY (sex determining region Y)-box 5                                        |
| 20.2 | 205832_at   |   | CPA4                         | carboxypeptidase A4                                                         |
| 20.1 | 240388_at   |   | KRT27                        | keratin 27                                                                  |
| 19.8 | 228058_at   |   | ZG16B                        | zymogen granule protein 16 homolog B (rat)                                  |
| 19.8 | 213780_at   |   | TCHH                         | trichohyalin                                                                |
| 19.7 | 37004_at    | D | SFTPB                        | surfactant protein B                                                        |
| 19.6 | 1555800_at  | D | ZNF385B                      | zinc finger protein 385B                                                    |
| 19.3 | 234940_s_at | D | VEPH1                        | ventricular zone expressed PH domain homolog 1 (zebrafish)                  |
| 19.3 | 212998_x_at | D | HLA-DQB1                     | major histocompatibility complex, class II, DQ beta 1                       |
| 19.2 | 222932_at   | D | EHF                          | ets homologous factor                                                       |
| 19.2 | 227771_at   | D | LIFR                         | leukemia inhibitory factor receptor alpha                                   |
| 19.1 | 226459_at   | D | PIK3AP1                      | phosphoinositide-3-kinase adaptor protein 1                                 |
| 18.8 | 206601_s_at | D | HOXD3                        | homeobox D3                                                                 |
| 18.6 | 214621_at   |   | GYS2                         | glycogen synthase 2 (liver)                                                 |
| 18.5 | 235272_at   |   | SBSN                         | suprabasin                                                                  |
| 18.5 | 227848_at   |   | PEBP4                        | phosphatidylethanolamine-binding protein 4                                  |
| 18.4 | 216368_s_at | D | COL4A3                       | collagen, type IV, alpha 3 (Goodpasture antigen)                            |
| 18.3 | 220281_at   |   | SLC12A1                      | solute carrier family 12 (sodium/potassium/chloride transporters), member 1 |
| 18.1 | 205426_s_at | D | HIP1 (includes EG:176224)    | huntingtin interacting protein 1                                            |
| 18.0 | 229019_at   | D | ZNF385B                      | zinc finger protein 385B                                                    |
| 17.9 | 205522_at   |   | HOXD4                        | homeobox D4                                                                 |

Hui L, Wick HC, Edlow AG, Cowan JM, Bianchi DJW. Global gene expression analysis of term amniotic fluid cell-free fetal RNA *Obstet Gynecol* 2013;121.

The authors provided this information as a supplement to their article.

© Copyright 2013 American College of Obstetricians and Gynecologists.

|      |              |   |                           |                                                                                                     |
|------|--------------|---|---------------------------|-----------------------------------------------------------------------------------------------------|
| 17.8 | 228979_at    |   | SFTA3                     | surfactant associated 3                                                                             |
| 17.7 | 214913_at    |   | ADAMTS3                   | ADAM metalloproteinase with thrombospondin type 1 motif, 3                                          |
| 17.7 | 221302_at    | D | KLF15                     | Kruppel-like factor 15                                                                              |
| 17.6 | 206626_x_at  |   | SSX1                      | synovial sarcoma, X breakpoint 1                                                                    |
| 17.6 | 232122_s_at  | D | VEPH1                     | ventricular zone expressed PH domain homolog 1 (zebrafish)                                          |
| 17.4 | 213936_x_at  | D | SFTPB                     | surfactant protein B                                                                                |
| 17.4 | 227174_at    | D | WDR72                     | WD repeat domain 72                                                                                 |
| 17.4 | 203196_at    | D | ABCC4 (includes EG:10257) | ATP-binding cassette, sub-family C (CFTR/MRP), member 4                                             |
| 17.3 | 217053_x_at  | D | ETV1                      | ets variant 1                                                                                       |
| 17.3 | 206509_at    |   | PIP                       | prolactin-induced protein                                                                           |
| 17.2 | 212671_s_at  | D | HLA-DQA1                  | major histocompatibility complex, class II, DQ alpha 1                                              |
| 17.2 | 226682_at    | D | RORA                      | RAR-related orphan receptor A                                                                       |
| 17.1 | 212314_at    | D | SEL1L3                    | sel-1 suppressor of lin-12-like 3 (C. elegans)                                                      |
| 17.1 | 219747_at    |   | NDNF                      | neuron-derived neurotrophic factor                                                                  |
| 17.1 | 219616_at    | D | ACSS3                     | acyl-CoA synthetase short-chain family member 3                                                     |
| 16.9 | 241765_at    | D | CPM                       | carboxypeptidase M                                                                                  |
| 16.9 | 229834_at    | D | NFIX                      | nuclear factor I/X (CCAAT-binding transcription factor)                                             |
| 16.8 | 221911_at    | D | ETV1                      | ets variant 1                                                                                       |
| 16.6 | 232074_at    |   | PRSS27                    | protease, serine 27                                                                                 |
| 16.6 | 222150_s_at  | D | PION                      | pigeon homolog (Drosophila)                                                                         |
| 16.6 | 240063_at    |   | GUSBP5                    | glucuronidase, beta pseudogene 5                                                                    |
| 16.6 | 222717_at    | D | SDPR                      | serum deprivation response                                                                          |
| 16.6 | 220187_at    | D | STEAP4                    | STEAP family member 4                                                                               |
| 16.6 | 229476_s_at  | D | THRSP                     | thyroid hormone responsive                                                                          |
| 16.6 | 220431_at    |   | TMPRSS11E                 | transmembrane protease, serine 11E                                                                  |
| 16.4 | 209909_s_at  | D | TGFB2                     | transforming growth factor, beta 2                                                                  |
| 16.4 | 215704_at    |   | FLG                       | filaggrin                                                                                           |
| 16.4 | 211981_at    |   | COL4A1                    | collagen, type IV, alpha 1                                                                          |
| 16.3 | 211497_x_at  | D | NKX3-1                    | NK3 homeobox 1                                                                                      |
| 16.3 | 201467_s_at  |   | NQO1                      | NAD(P)H dehydrogenase, quinone 1                                                                    |
| 16.1 | 240951_at    | D | RORA                      | RAR-related orphan receptor A                                                                       |
| 16.0 | 210906_x_at  | D | AQP4                      | aquaporin 4                                                                                         |
| 15.9 | 225369_at    |   | ESAM                      | endothelial cell adhesion molecule                                                                  |
| 15.9 | 205625_s_at  | D | CALB1                     | calbindin 1, 28kDa                                                                                  |
| 15.7 | 227198_at    | D | AFF3                      | AF4/FMR2 family, member 3                                                                           |
| 15.7 | 243884_at    |   | TEX26                     | testis expressed 26                                                                                 |
| 15.7 | 229779_at    | D | COL4A4                    | collagen, type IV, alpha 4                                                                          |
| 15.7 | 225571_at    | D | LIFR                      | leukemia inhibitory factor receptor alpha                                                           |
| 15.7 | 1555801_s_at | D | ZNF385B                   | zinc finger protein 385B                                                                            |
| 15.6 | 1563874_at   | D | WDR72                     | WD repeat domain 72                                                                                 |
| 15.5 | 206869_at    |   | CHAD                      | chondroadherin                                                                                      |
| 15.5 | 204508_s_at  | D | CA12                      | carbonic anhydrase XII                                                                              |
| 15.5 | 211743_s_at  |   | PRG2                      | proteoglycan 2, bone marrow (natural killer cell activator, eosinophil granule major basic protein) |
| 15.5 | 1554997_a_at | D | PTGS2                     | prostaglandin-endoperoxide synthase 2 (prostaglandin G/H synthase and cyclooxygenase)               |

Hui L, Wick HC, Edlow AG, Cowan JM, Bianchi DJW. Global gene expression analysis of term amniotic fluid cell-free fetal RNA *Obstet Gynecol* 2013;121.

The authors provided this information as a supplement to their article.

© Copyright 2013 American College of Obstetricians and Gynecologists.



|      |              |   |                        |                                                                           |
|------|--------------|---|------------------------|---------------------------------------------------------------------------|
| 15.3 | 204944_at    |   | PTPRG                  | protein tyrosine phosphatase, receptor type, G                            |
| 15.3 | 215454_x_at  | D | SFTPC                  | surfactant protein C                                                      |
| 15.2 | 204753_s_at  | D | HLF                    | hepatic leukemia factor                                                   |
| 15.2 | 228945_s_at  | D | SLC39A8                | solute carrier family 39 (zinc transporter), member 8                     |
| 15.0 | 202157_s_at  | D | CELF2                  | CUGBP, Elav-like family member 2                                          |
| 14.9 | 201474_s_at  |   | ITGA3                  | integrin, alpha 3 (antigen CD49C, alpha 3 subunit of VLA-3 receptor)      |
| 14.8 | 226147_s_at  | D | PIGR                   | polymeric immunoglobulin receptor                                         |
| 14.8 | 235183_at    |   | LOC100506804           | uncharacterized LOC100506804                                              |
| 14.7 | 210497_x_at  |   | SSX2 (includes others) | synovial sarcoma, X breakpoint 2                                          |
| 14.6 | 218864_at    | D | TNS1                   | tensin 1                                                                  |
| 14.6 | 218087_s_at  | D | SORBS1                 | sorbin and SH3 domain containing 1                                        |
| 14.5 | 205876_at    | D | LIFR                   | leukemia inhibitory factor receptor alpha                                 |
| 14.5 | 216898_s_at  | D | COL4A3                 | collagen, type IV, alpha 3 (Goodpasture antigen)                          |
| 14.4 | 220150_s_at  | D | FAM184A                | family with sequence similarity 184, member A                             |
| 14.4 | 234980_at    |   | TMEM56                 | transmembrane protein 56                                                  |
| 14.3 | 205591_at    |   | OLFM1                  | olfactomedin 1                                                            |
| 14.2 | 219732_at    |   | LPPR1                  | lipid phosphate phosphatase-related protein type 1                        |
| 14.2 | 204259_at    |   | MMP7                   | matrix metalloproteinase 7 (matrilysin, uterine)                          |
| 14.2 | 204286_s_at  | D | PMAIP1                 | phorbol-12-myristate-13-acetate-induced protein 1                         |
| 14.2 | 222380_s_at  |   | PDCD6                  | programmed cell death 6                                                   |
| 14.1 | 217996_at    | D | PHLDA1                 | pleckstrin homology-like domain, family A, member 1                       |
| 14.1 | 235019_at    | D | CPM                    | carboxypeptidase M                                                        |
| 14.0 | 206847_s_at  |   | HOXA7                  | homeobox A7                                                               |
| 14.0 | 209774_x_at  |   | CXCL2                  | chemokine (C-X-C motif) ligand 2                                          |
| 14.0 | 209386_at    | D | TM4SF1                 | transmembrane 4 L six family member 1                                     |
| 13.9 | 235099_at    |   | CMTM8                  | CKLF-like MARVEL transmembrane domain containing 8                        |
| 13.9 | 214204_at    |   | PACRG                  | PARK2 co-regulated                                                        |
| 13.9 | 223798_at    | D | SLC41A2                | solute carrier family 41, member 2                                        |
| 13.9 | 206448_at    |   | ZNF365                 | zinc finger protein 365                                                   |
| 13.9 | 213638_at    |   | PHACTR1                | phosphatase and actin regulator 1                                         |
| 13.8 | 1553721_at   | D | RNF152                 | ring finger protein 152                                                   |
| 13.8 | 209555_s_at  | D | CD36                   | CD36 molecule (thrombospondin receptor)                                   |
| 13.8 | 222646_s_at  | D | ERO1L                  | ERO1-like ( <i>S. cerevisiae</i> )                                        |
| 13.7 | 223720_at    |   | SPINK7                 | serine peptidase inhibitor, Kazal type 7 (putative)                       |
| 13.7 | 1559992_a_at |   | LOC100505967           | uncharacterized LOC100505967                                              |
| 13.7 | 219633_at    |   | TTPAL                  | tocopherol (alpha) transfer protein-like                                  |
| 13.6 | 1567627_at   | D | CD74                   | CD74 molecule, major histocompatibility complex, class II invariant chain |
| 13.5 | 209810_at    | D | SFTPB                  | surfactant protein B                                                      |
| 13.5 | 227642_at    | D | TFCP2L1                | transcription factor CP2-like 1                                           |
| 13.5 | 203348_s_at  | D | ETV5                   | ets variant 5                                                             |
| 13.4 | 243611_at    |   | MICALCL                | MICAL C-terminal like                                                     |
| 13.4 | 209493_at    | D | PDZD2                  | PDZ domain containing 2                                                   |
| 13.3 | 218863_s_at  | D | TNS1                   | tensin 1                                                                  |
| 13.3 | 237020_at    |   | CATSPERD               | catsper channel auxiliary subunit delta                                   |

Hui L, Wick HC, Edlow AG, Cowan JM, Bianchi DJW. Global gene expression analysis of term amniotic fluid cell-free fetal RNA *Obstet Gynecol* 2013;121.

The authors provided this information as a supplement to their article.

© Copyright 2013 American College of Obstetricians and Gynecologists.

|      |              |   |                           |                                                            |
|------|--------------|---|---------------------------|------------------------------------------------------------|
| 13.3 | 210762_s_at  | D | DLC1                      | deleted in liver cancer 1                                  |
| 13.2 | 203963_at    | D | CA12                      | carbonic anhydrase XII                                     |
| 13.2 | 205464_at    |   | SCNN1B                    | sodium channel, non-voltage-gated 1, beta subunit          |
| 13.1 | 201163_s_at  |   | IGFBP7                    | insulin-like growth factor binding protein 7               |
| 13.0 | 205151_s_at  |   | TRIL                      | TLR4 interactor with leucine-rich repeats                  |
| 12.8 | 239650_at    |   | NCKAP5                    | NCK-associated protein 5                                   |
| 12.6 | 211819_s_at  | D | SORBS1                    | sorbin and SH3 domain containing 1                         |
| 12.6 | 238017_at    |   | SDR16C5                   | short chain dehydrogenase/reductase family 16C, member 5   |
| 12.5 | 214135_at    | D | CLDN18                    | claudin 18                                                 |
| 12.4 | 240189_at    |   | ACOXL                     | acyl-CoA oxidase-like                                      |
| 12.4 | 1553973_a_at |   | SPINK6                    | serine peptidase inhibitor, Kazal type 6                   |
| 12.4 | 210538_s_at  | D | BIRC3                     | baculoviral IAP repeat containing 3                        |
| 12.3 | 1556711_at   |   | FAM216B                   | family with sequence similarity 216, member B              |
| 12.3 | 228943_at    |   | MAP6                      | microtubule-associated protein 6                           |
| 12.3 | 221910_at    | D | ETV1                      | ets variant 1                                              |
| 12.3 | 204437_s_at  |   | FOLR1                     | folate receptor 1 (adult)                                  |
| 12.3 | 210550_s_at  |   | RASGRF1                   | Ras protein-specific guanine nucleotide-releasing factor 1 |
| 12.2 | 202291_s_at  |   | MGP                       | matrix Gla protein                                         |
| 12.2 | 226067_at    |   | BPIFB1                    | BPI fold containing family B, member 1                     |
| 12.2 | 239272_at    | D | MMP28                     | matrix metalloproteinase 28                                |
| 12.2 | 216504_s_at  | D | SLC39A8                   | solute carrier family 39 (zinc transporter), member 8      |
| 12.2 | 226621_at    |   | OSMR                      | oncostatin M receptor                                      |
| 12.2 | 228103_s_at  | D | NRP2                      | neuropilin 2                                               |
| 12.1 | 217046_s_at  | D | AGER                      | advanced glycosylation end product-specific receptor       |
| 12.0 | 204213_at    | D | PIGR                      | polymeric immunoglobulin receptor                          |
| 11.9 | 231859_at    |   | C14orf132                 | chromosome 14 open reading frame 132                       |
| 11.9 | 209267_s_at  | D | SLC39A8                   | solute carrier family 39 (zinc transporter), member 8      |
| 11.9 | 207073_at    | D | CDKL2                     | cyclin-dependent kinase-like 2 (CDC2-related kinase)       |
| 11.8 | 229464_at    | D | MYEF2                     | myelin expression factor 2                                 |
| 11.7 | 222513_s_at  | D | SORBS1                    | sorbin and SH3 domain containing 1                         |
| 11.6 | 238877_at    |   | EYA4                      | eyes absent homolog 4 (Drosophila)                         |
| 11.5 | 218980_at    |   | FHOD3                     | formin homology 2 domain containing 3                      |
| 11.5 | 204621_s_at  |   | NR4A2                     | nuclear receptor subfamily 4, group A, member 2            |
| 11.4 | 216896_at    | D | COL4A3                    | collagen, type IV, alpha 3 (Goodpasture antigen)           |
| 11.3 | 220003_at    |   | LRRC36                    | leucine rich repeat containing 36                          |
| 11.2 | 213692_s_at  |   | VDR                       | vitamin D (1,25-dihydroxyvitamin D3) receptor              |
| 11.2 | 1555039_a_at | D | ABCC4 (includes EG:10257) | ATP-binding cassette, sub-family C (CFTR/MRP), member 4    |
| 11.1 | 206488_s_at  | D | CD36                      | CD36 molecule (thrombospondin receptor)                    |
| 11.1 | 205290_s_at  |   | BMP2                      | bone morphogenetic protein 2                               |
| 11.1 | 243896_at    |   | WDR96                     | WD repeat domain 96                                        |
| 11.1 | 200795_at    |   | SPARCL1                   | SPARC-like 1 (hevin)                                       |
| 11.0 | 204072_s_at  |   | FRY                       | furry homolog (Drosophila)                                 |
| 11.0 | 219159_s_at  |   | SLAMF7                    | SLAM family member 7                                       |
| 11.0 | 219669_at    |   | CD177                     | CD177 molecule                                             |

Hui L, Wick HC, Edlow AG, Cowan JM, Bianchi DJW. Global gene expression analysis of term amniotic fluid cell-free fetal RNA *Obstet Gynecol* 2013;121.

The authors provided this information as a supplement to their article.

© Copyright 2013 American College of Obstetricians and Gynecologists.

|      |              |   |                              |                                                                 |
|------|--------------|---|------------------------------|-----------------------------------------------------------------|
| 10.9 | 213261_at    |   | TRANK1                       | tetratricopeptide repeat and ankyrin repeat containing 1        |
| 10.9 | 216375_s_at  | D | ETV5                         | ets variant 5                                                   |
| 10.8 | 209365_s_at  |   | ECM1 (includes EG:100332249) | extracellular matrix protein 1                                  |
| 10.7 | 238862_at    | D | MFSD4                        | major facilitator superfamily domain containing 4               |
| 10.7 | 216881_x_at  |   | PRB4                         | proline-rich protein BstNI subfamily 4                          |
| 10.7 | 221161_at    |   | ASCL3                        | achaete-scute complex homolog 3 (Drosophila)                    |
| 10.7 | 238353_at    |   | RASL11A                      | RAS-like, family 11, member A                                   |
| 10.7 | 212950_at    | D | GPR116                       | G protein-coupled receptor 116                                  |
| 10.7 | 223315_at    |   | NTN4                         | netrin 4                                                        |
| 10.7 | 210800_at    |   | TIMM8A                       | translocase of inner mitochondrial membrane 8 homolog A (yeast) |
| 10.6 | 215672_s_at  | D | AHCYL2                       | adenosylhomocysteinase-like 2                                   |
| 10.6 | 216367_at    | D | COL4A3                       | collagen, type IV, alpha 3 (Goodpasture antigen)                |
| 10.6 | 211656_x_at  | D | HLA-DQB1                     | major histocompatibility complex, class II, DQ beta 1           |
| 10.6 | 225745_at    |   | LRP6                         | low density lipoprotein receptor-related protein 6              |
| 10.5 | 205317_s_at  |   | SLC15A2                      | solute carrier family 15 (H+/peptide transporter), member 2     |
| 10.5 | 219795_at    |   | SLC6A14                      | solute carrier family 6 (amino acid transporter), member 14     |
| 10.5 | 222071_s_at  |   | SLCO4C1                      | solute carrier organic anion transporter family, member 4C1     |
| 10.4 | 225165_at    |   | PPP1R1B                      | protein phosphatase 1, regulatory (inhibitor) subunit 1B        |
| 10.4 | 238385_at    | D | C6orf58                      | chromosome 6 open reading frame 58                              |
| 10.4 | 206193_s_at  | D | CDSN                         | corneodesmosin                                                  |
| 10.4 | 208963_x_at  | D | FADS1                        | fatty acid desaturase 1                                         |
| 10.4 | 1553169_at   |   | LRRN4                        | leucine rich repeat neuronal 4                                  |
| 10.4 | 1554712_a_at |   | GLYATL2                      | glycine-N-acyltransferase-like 2                                |
| 10.3 | 203504_s_at  | D | ABCA1                        | ATP-binding cassette, sub-family A (ABC1), member 1             |
| 10.3 | 225619_at    |   | SLAIN1                       | SLAIN motif family, member 1                                    |
| 10.3 | 1560834_a_at |   | RMST                         | rhabdomyosarcoma 2 associated transcript (non-protein coding)   |
| 10.3 | 218857_s_at  | D | ASRGL1                       | asparaginase like 1                                             |
| 10.2 | 205425_at    | D | HIP1 (includes EG:176224)    | huntingtin interacting protein 1                                |
| 10.2 | 236289_at    |   | LOC100506563                 | uncharacterized LOC100506563                                    |
| 10.2 | 229341_at    | D | TFCP2L1                      | transcription factor CP2-like 1                                 |
| 10.1 | 239273_s_at  | D | MMP28                        | matrix metalloproteinase 28                                     |
| 10.1 | 219703_at    |   | MNS1                         | meiosis-specific nuclear structural 1                           |
| 10.1 | 213432_at    | D | MUC5AC/MUC5B                 | mucin 5AC, oligomeric mucus/gel-forming                         |
| 10.0 | 1557146_a_at |   | LOC146336                    | uncharacterized LOC146336                                       |
| 10.0 | 227702_at    |   | CYP4X1                       | cytochrome P450, family 4, subfamily X, polypeptide 1           |
| 10.0 | 230841_at    | D | FAM184A                      | family with sequence similarity 184, member A                   |
| 10.0 | 226066_at    |   | MITF                         | microphthalmia-associated transcription factor                  |
| 9.9  | 236523_at    |   | LOC285556                    | uncharacterized LOC285556                                       |
| 9.8  | 205735_s_at  | D | AFF3                         | AF4/FMR2 family, member 3                                       |

Hui L, Wick HC, Edlow AG, Cowan JM, Bianchi DJW. Global gene expression analysis of term amniotic fluid cell-free fetal RNA *Obstet Gynecol* 2013;121.

The authors provided this information as a supplement to their article.

© Copyright 2013 American College of Obstetricians and Gynecologists.

|     |              |   |                              |                                                                        |
|-----|--------------|---|------------------------------|------------------------------------------------------------------------|
| 9.8 | 225817_at    |   | CGNL1                        | cingulin-like 1                                                        |
| 9.8 | 210832_x_at  | D | PTGER3                       | prostaglandin E receptor 3 (subtype EP3)                               |
| 9.8 | 241791_at    | D | TTN (includes EG:22138)      | titin                                                                  |
| 9.7 | 207308_at    |   | SLCO1A2                      | solute carrier organic anion transporter family, member 1A2            |
| 9.7 | 202660_at    | D | ITPR2                        | inositol 1,4,5-trisphosphate receptor, type 2                          |
| 9.7 | 203505_at    | D | ABCA1                        | ATP-binding cassette, sub-family A (ABC1), member 1                    |
| 9.7 | 214476_at    |   | TFF2                         | trefoil factor 2                                                       |
| 9.6 | 212095_s_at  | D | MTUS1                        | microtubule associated tumor suppressor 1                              |
| 9.6 | 1553645_at   |   | CCDC141                      | coiled-coil domain containing 141                                      |
| 9.6 | 243386_at    |   | CASZ1                        | castor zinc finger 1                                                   |
| 9.6 | 1552960_at   | D | LRRC15                       | leucine rich repeat containing 15                                      |
| 9.6 | 233026_s_at  | D | PDZD2                        | PDZ domain containing 2                                                |
| 9.5 | 230740_at    |   | EHD3                         | EH-domain containing 3                                                 |
| 9.5 | 230499_at    | D | BIRC3                        | baculoviral IAP repeat containing 3                                    |
| 9.5 | 209821_at    |   | IL33                         | interleukin 33                                                         |
| 9.3 | 209457_at    |   | DUSP5                        | dual specificity phosphatase 5                                         |
| 9.3 | 206319_s_at  | D | SPINLW1                      | serine peptidase inhibitor-like, with Kunitz and WAP domains 1 (eppin) |
| 9.3 | 240349_at    | D | PRKAA2                       | protein kinase, AMP-activated, alpha 2 catalytic subunit               |
| 9.2 | 205725_at    |   | SCGB1A1                      | secretoglobulin, family 1A, member 1 (uteroglobin)                     |
| 9.2 | 1553843_at   | D | C10orf67                     | chromosome 10 open reading frame 67                                    |
| 9.2 | 206082_at    |   | HCP5                         | HLA complex P5 (non-protein coding)                                    |
| 9.1 | 221132_at    | D | CLDN18                       | claudin 18                                                             |
| 9.1 | 243681_at    | D | SHANK2                       | SH3 and multiple ankyrin repeat domains 2                              |
| 9.1 | 1558324_a_at |   | TMEM72                       | transmembrane protein 72                                               |
| 9.0 | 201627_s_at  | D | INSIG1                       | insulin induced gene 1                                                 |
| 9.0 | 238356_at    |   | DOCK11                       | dedicator of cytokinesis 11                                            |
| 9.0 | 205413_at    | D | MPPED2                       | metallophosphoesterase domain containing 2                             |
| 9.0 | 206068_s_at  |   | ACADL                        | acyl-CoA dehydrogenase, long chain                                     |
| 9.0 | 217014_s_at  | D | AZGP1                        | alpha-2-glycoprotein 1, zinc-binding                                   |
| 9.0 | 213308_at    | D | SHANK2                       | SH3 and multiple ankyrin repeat domains 2                              |
| 8.9 | 1558101_at   | D | NFIA                         | nuclear factor I/A                                                     |
| 8.9 | 226460_at    | D | FNIP2                        | folliculin interacting protein 2                                       |
| 8.9 | 231945_at    | D | FILIP1                       | filamin A interacting protein 1                                        |
| 8.8 | 235371_at    | D | GXYLT2                       | glucoside xylosyltransferase 2                                         |
| 8.8 | 210852_s_at  |   | AASS                         | aminoadipate-semialdehyde synthase                                     |
| 8.8 | 204273_at    |   | EDNRB                        | endothelin receptor type B                                             |
| 8.8 | 220092_s_at  |   | ANTXR1                       | anthrax toxin receptor 1                                               |
| 8.8 | 223839_s_at  | D | SCD                          | stearoyl-CoA desaturase (delta-9-desaturase)                           |
| 8.8 | 230135_at    | D | HHIP                         | hedgehog interacting protein                                           |
| 8.8 | 1557016_a_at |   | C1orf177                     | chromosome 1 open reading frame 177                                    |
| 8.8 | 227475_at    |   | FOXQ1                        | forkhead box Q1                                                        |
| 8.8 | 212327_at    | D | LIMCH1                       | LIM and calponin homology domains 1                                    |
| 8.8 | 204490_s_at  | D | CD44 (includes EG:100330801) | CD44 molecule (Indian blood group)                                     |
| 8.8 | 214358_at    | D | ACACA                        | acetyl-CoA carboxylase alpha                                           |

Hui L, Wick HC, Edlow AG, Cowan JM, Bianchi DJW. Global gene expression analysis of term amniotic fluid cell-free fetal RNA *Obstet Gynecol* 2013;121.

The authors provided this information as a supplement to their article.

© Copyright 2013 American College of Obstetricians and Gynecologists.

|     |              |   |                            |                                                                                   |
|-----|--------------|---|----------------------------|-----------------------------------------------------------------------------------|
| 8.7 | 204081_at    |   | NRGN                       | neurogranin (protein kinase C substrate, RC3)                                     |
| 8.7 | 227856_at    |   | C4orf32                    | chromosome 4 open reading frame 32                                                |
| 8.7 | 221245_s_at  |   | FZD5                       | frizzled family receptor 5                                                        |
| 8.7 | 202422_s_at  |   | ACSL4                      | acyl-CoA synthetase long-chain family member 4                                    |
| 8.7 | 215808_at    | D | KLK10                      | kallikrein-related peptidase 10                                                   |
| 8.7 | 210682_at    |   | LPO                        | lactoperoxidase                                                                   |
| 8.7 | 233534_at    |   | KRTAP3-2                   | keratin associated protein 3-2                                                    |
| 8.7 | 217997_at    | D | PHLDA1                     | pleckstrin homology-like domain, family A, member 1                               |
| 8.7 | 1562722_at   |   | PRR20A (includes others)   | proline rich 20A                                                                  |
| 8.7 | 222484_s_at  |   | CXCL14                     | chemokine (C-X-C motif) ligand 14                                                 |
| 8.6 | 212830_at    |   | MEGF9                      | multiple EGF-like-domains 9                                                       |
| 8.6 | 1556037_s_at | D | HHIP                       | hedgehog interacting protein                                                      |
| 8.6 | 222874_s_at  |   | CLN8                       | ceroid-lipofuscinosis, neuronal 8 (epilepsy, progressive with mental retardation) |
| 8.6 | 222764_at    | D | ASRGL1                     | asparaginase like 1                                                               |
| 8.6 | 214434_at    |   | HSPA12A                    | heat shock 70kDa protein 12A                                                      |
| 8.6 | 213909_at    | D | LRRC15                     | leucine rich repeat containing 15                                                 |
| 8.6 | 203349_s_at  | D | ETV5                       | ets variant 5                                                                     |
| 8.6 | 214223_at    |   | PTP4A3                     | protein tyrosine phosphatase type IVA, member 3                                   |
| 8.5 | 214723_x_at  |   | ANKRD36B (includes others) | ankyrin repeat domain 36B                                                         |
| 8.5 | 216893_s_at  | D | COL4A3                     | collagen, type IV, alpha 3 (Goodpasture antigen)                                  |
| 8.4 | 219195_at    |   | PPARGC1A                   | peroxisome proliferator-activated receptor gamma, coactivator 1 alpha             |
| 8.4 | 240065_at    |   | FAM81B                     | family with sequence similarity 81, member B                                      |
| 8.4 | 209842_at    |   | SOX10                      | SRY (sex determining region Y)-box 10                                             |
| 8.4 | 242349_at    | D | HECTD1                     | HECT domain containing E3 ubiquitin protein ligase 1                              |
| 8.4 | 211685_s_at  |   | NCALD                      | neurocalcin delta                                                                 |
| 8.4 | 221221_s_at  |   | KLHL3                      | kelch-like 3 (Drosophila)                                                         |
| 8.4 | 211425_x_at  |   | SSX4/SSX4B                 | synovial sarcoma, X breakpoint 4                                                  |
| 8.4 | 233488_at    | D | RNASE7                     | ribonuclease, RNase A family, 7                                                   |
| 8.3 | 211726_s_at  | D | FMO2                       | flavin containing monooxygenase 2 (non-functional)                                |
| 8.3 | 215274_at    |   | SLC12A3                    | solute carrier family 12 (sodium/chloride transporters), member 3                 |
| 8.3 | 203021_at    |   | SLPI                       | secretory leukocyte peptidase inhibitor                                           |
| 8.3 | 205466_s_at  |   | HS3ST1                     | heparan sulfate (glucosamine) 3-O-sulfotransferase 1                              |
| 8.3 | 1554074_s_at |   | SLFNL1                     | schlafen-like 1                                                                   |
| 8.2 | 1557014_a_at |   | FAM201A                    | family with sequence similarity 201, member A                                     |
| 8.2 | 215026_x_at  | D | SCNN1A                     | sodium channel, non-voltage-gated 1 alpha subunit                                 |
| 8.2 | 213150_at    | D | HOXA10                     | homeobox A10                                                                      |
| 8.2 | 212814_at    | D | AHCYL2                     | adenosylhomocysteinase-like 2                                                     |
| 8.2 | 1556421_at   |   | LOC286189                  | uncharacterized LOC286189                                                         |
| 8.2 | 228347_at    | D | SIX1                       | SIX homeobox 1                                                                    |

Hui L, Wick HC, Edlow AG, Cowan JM, Bianchi DJW. Global gene expression analysis of term amniotic fluid cell-free fetal RNA *Obstet Gynecol* 2013;121.

The authors provided this information as a supplement to their article.

© Copyright 2013 American College of Obstetricians and Gynecologists.

|     |              |   |                              |                                                                                                   |
|-----|--------------|---|------------------------------|---------------------------------------------------------------------------------------------------|
| 8.2 | 233903_s_at  | D | ARHGEF26                     | Rho guanine nucleotide exchange factor (GEF) 26                                                   |
| 8.1 | 244056_at    |   | SFTA2                        | surfactant associated 2                                                                           |
| 8.1 | 1564307_a_at |   | A2ML1                        | alpha-2-macroglobulin-like 1                                                                      |
| 8.1 | 230956_at    | D | C11orf92                     | chromosome 11 open reading frame 92                                                               |
| 8.0 | 1555579_s_at | D | PTPRM                        | protein tyrosine phosphatase, receptor type, M                                                    |
| 8.0 | 228121_at    | D | TGFB2                        | transforming growth factor, beta 2                                                                |
| 8.0 | 228268_at    | D | FMO2                         | flavin containing monooxygenase 2 (non-functional)                                                |
| 8.0 | 205975_s_at  |   | HOXD1                        | homeobox D1                                                                                       |
| 8.0 | 231966_at    | D | PPP1R9A                      | protein phosphatase 1, regulatory subunit 9A                                                      |
| 8.0 | 209966_x_at  |   | ESRRG                        | estrogen-related receptor gamma                                                                   |
| 8.0 | 1557905_s_at | D | CD44 (includes EG:100330801) | CD44 molecule (Indian blood group)                                                                |
| 7.9 | 216841_s_at  | D | SOD2                         | superoxide dismutase 2, mitochondrial                                                             |
| 7.9 | 241603_at    | D | ATP11A                       | ATPase, class VI, type 11A                                                                        |
| 7.9 | 217061_s_at  | D | ETV1                         | ets variant 1                                                                                     |
| 7.9 | 212365_at    | D | MYO1B                        | myosin IB                                                                                         |
| 7.9 | 204919_at    |   | PRR4                         | proline rich 4 (lacrimal)                                                                         |
| 7.9 | 206067_s_at  |   | WT1                          | Wilms tumor 1                                                                                     |
| 7.9 | 221884_at    | D | MECOM                        | MDS1 and EVI1 complex locus                                                                       |
| 7.8 | 202587_s_at  |   | AK1                          | adenylate kinase 1                                                                                |
| 7.8 | p            |   | STS                          | steroid sulfatase (microsomal), isozyme S                                                         |
| 7.8 | 1553055_a_at | D | SLFN5                        | schlafen family member 5                                                                          |
| 7.8 | 209835_x_at  | D | CD44 (includes EG:100330801) | CD44 molecule (Indian blood group)                                                                |
| 7.8 | 224062_x_at  |   | KLK4                         | kallikrein-related peptidase 4                                                                    |
| 7.8 | 212364_at    | D | MYO1B                        | myosin IB                                                                                         |
| 7.8 | 207357_s_at  | D | GALNT10                      | UDP-N-acetyl-alpha-D-galactosamine: polypeptide N-acetylgalactosaminyltransferase 10 (GalNAc-T10) |
| 7.7 | 206192_at    | D | CDSN                         | corneodesmosin                                                                                    |
| 7.7 | 219882_at    |   | TLL7                         | tubulin tyrosine ligase-like family, member 7                                                     |
| 7.7 | 220034_at    |   | IRAK3                        | interleukin-1 receptor-associated kinase 3                                                        |
| 7.7 | 227400_at    | D | NFIX                         | nuclear factor I/X (CCAAT-binding transcription factor)                                           |
| 7.7 | 225564_at    |   | SPATA13                      | spermatogenesis associated 13                                                                     |
| 7.7 | 231315_at    | D | NKX2-1                       | NK2 homeobox 1                                                                                    |
| 7.7 | 226770_at    | D | MAGI3                        | membrane associated guanylate kinase, WW and PDZ domain containing 3                              |
| 7.7 | 204698_at    |   | ISG20                        | interferon stimulated exonuclease gene 20kDa                                                      |
| 7.7 | 210479_s_at  | D | RORA                         | RAR-related orphan receptor A                                                                     |
| 7.6 | 209794_at    |   | SRGAP3                       | SLIT-ROBO Rho GTPase activating protein 3                                                         |
| 7.6 | 203329_at    | D | PTPRM                        | protein tyrosine phosphatase, receptor type, M                                                    |
| 7.6 | 209409_at    |   | GRB10                        | growth factor receptor-bound protein 10                                                           |
| 7.6 | 212274_at    | D | LPIN1                        | lipin 1                                                                                           |
| 7.6 | 205067_at    | D | IL1B                         | interleukin 1, beta                                                                               |
| 7.6 | 203699_s_at  |   | DIO2                         | deiodinase, iodothyronine, type II                                                                |
| 7.6 | 206873_at    |   | CA6                          | carbonic anhydrase VI                                                                             |

Hui L, Wick HC, Edlow AG, Cowan JM, Bianchi DJW. Global gene expression analysis of term amniotic fluid cell-free fetal RNA *Obstet Gynecol* 2013;121.

The authors provided this information as a supplement to their article.

© Copyright 2013 American College of Obstetricians and Gynecologists.

|     |              |   |           |                                                                          |
|-----|--------------|---|-----------|--------------------------------------------------------------------------|
| 7.6 | 213106_at    | D | ATP8A1    | ATPase, aminophospholipid transporter (APLT), class I, type 8A, member 1 |
| 7.6 | 230114_at    |   | HOXB8     | homeobox B8                                                              |
| 7.6 | 229222_at    | D | ACSS3     | acyl-CoA synthetase short-chain family member 3                          |
| 7.5 | 212328_at    | D | LIMCH1    | LIM and calponin homology domains 1                                      |
| 7.5 | 224822_at    | D | DLC1      | deleted in liver cancer 1                                                |
| 7.5 | 221874_at    |   | KIAA1324  | KIAA1324                                                                 |
| 7.5 | 212510_at    |   | GPD1L     | glycerol-3-phosphate dehydrogenase 1-like                                |
| 7.5 | 204942_s_at  |   | ALDH3B2   | aldehyde dehydrogenase 3 family, member B2                               |
| 7.4 | 215264_at    |   | EMX1      | empty spiracles homeobox 1                                               |
| 7.4 | 231015_at    | D | KLF15     | Kruppel-like factor 15                                                   |
| 7.4 | 221747_at    | D | TNS1      | tensin 1                                                                 |
| 7.4 | 208325_s_at  | D | AKAP13    | A kinase (PRKA) anchor protein 13                                        |
| 7.4 | 229273_at    |   | SALL1     | sal-like 1 (Drosophila)                                                  |
| 7.4 | 203929_s_at  |   | MAPT      | microtubule-associated protein tau                                       |
| 7.4 | 227529_s_at  | D | AKAP12    | A kinase (PRKA) anchor protein 12                                        |
| 7.4 | 224884_at    | D | AKAP13    | A kinase (PRKA) anchor protein 13                                        |
| 7.4 | 1563772_a_at | D | LAMA3     | laminin, alpha 3                                                         |
| 7.4 | 228325_at    |   | KIAA0146  | KIAA0146                                                                 |
| 7.4 | 237719_x_at  |   | RGS7BP    | regulator of G-protein signaling 7 binding protein                       |
| 7.4 | 203180_at    |   | ALDH1A3   | aldehyde dehydrogenase 1 family, member A3                               |
| 7.3 | 210272_at    |   | CYP2B7P1  | cytochrome P450, family 2, subfamily B, polypeptide 7 pseudogene 1       |
| 7.3 | 205922_at    |   | VNN2      | vanin 2                                                                  |
| 7.3 | 226609_at    |   | DCBLD1    | discoidin, CUB and LCCL domain containing 1                              |
| 7.3 | 221718_s_at  | D | AKAP13    | A kinase (PRKA) anchor protein 13                                        |
| 7.3 | 202986_at    |   | ARNT2     | aryl-hydrocarbon receptor nuclear translocator 2                         |
| 7.3 | 206100_at    | D | CPM       | carboxypeptidase M                                                       |
| 7.3 | 234699_at    | D | RNASE7    | ribonuclease, RNase A family, 7                                          |
| 7.3 | 218692_at    |   | SYBU      | syntabulin (syntaxin-interacting)                                        |
| 7.3 | 225551_at    |   | CNST      | consortin, connexin sorting protein                                      |
| 7.3 | 227197_at    | D | ARHGEF26  | Rho guanine nucleotide exchange factor (GEF) 26                          |
| 7.3 | 236632_at    |   | LOC646576 | uncharacterized LOC646576                                                |
| 7.3 | 209992_at    | D | PFKFB2    | 6-phosphofructo-2-kinase/fructose-2,6-biphosphatase 2                    |
| 7.2 | 210512_s_at  | D | VEGFA     | vascular endothelial growth factor A                                     |
| 7.2 | 227908_at    |   | TBC1D24   | TBC1 domain family, member 24                                            |
| 7.2 | 218498_s_at  | D | ERO1L     | ERO1-like (S. cerevisiae)                                                |
| 7.1 | 204424_s_at  | D | LMO3      | LIM domain only 3 (rhombotin-like 2)                                     |
| 7.1 | 224048_at    |   | USP44     | ubiquitin specific peptidase 44                                          |
| 7.1 | 204712_at    |   | WIF1      | WNT inhibitory factor 1                                                  |
| 7.1 | 229047_at    | D | PLEKHB1   | pleckstrin homology domain containing, family B (evectins) member 1      |
| 7.1 | 234312_s_at  |   | ACSS2     | acyl-CoA synthetase short-chain family member 2                          |
| 7.1 | 223729_at    |   | CECR2     | cat eye syndrome chromosome region, candidate 2                          |
| 7.1 | 212990_at    |   | SYNJ1     | synaptojanin 1                                                           |
| 7.0 | 243894_at    | D | SLC41A2   | solute carrier family 41, member 2                                       |

Hui L, Wick HC, Edlow AG, Cowan JM, Bianchi DJW. Global gene expression analysis of term amniotic fluid cell-free fetal RNA *Obstet Gynecol* 2013;121.

The authors provided this information as a supplement to their article.

© Copyright 2013 American College of Obstetricians and Gynecologists.

|     |              |   |                               |                                                                                                           |
|-----|--------------|---|-------------------------------|-----------------------------------------------------------------------------------------------------------|
| 7.0 | 219850_s_at  | D | EHF                           | ets homologous factor                                                                                     |
| 7.0 | 220907_at    |   | GPR110                        | G protein-coupled receptor 110                                                                            |
| 7.0 | 208747_s_at  |   | C1S                           | complement component 1, s subcomponent                                                                    |
| 6.9 | 224189_x_at  | D | EHF                           | ets homologous factor                                                                                     |
| 6.9 | 213293_s_at  |   | TRIM22                        | tripartite motif containing 22                                                                            |
| 6.9 | 238625_at    |   | C1orf168                      | chromosome 1 open reading frame 168                                                                       |
| 6.9 | 204343_at    |   | ABCA3                         | ATP-binding cassette, sub-family A (ABC1), member 3                                                       |
| 6.9 | 200862_at    |   | DHCR24                        | 24-dehydrocholesterol reductase                                                                           |
| 6.9 | 204201_s_at  |   | PTPN13                        | protein tyrosine phosphatase, non-receptor type 13 (APO-1/CD95 (Fas)-associated phosphatase)              |
| 6.9 | 234700_s_at  | D | RNASE7                        | ribonuclease, RNase A family, 7                                                                           |
| 6.9 | 204285_s_at  | D | PMAIP1                        | phorbol-12-myristate-13-acetate-induced protein 1                                                         |
| 6.9 | 1554397_s_at |   | UEVLD                         | UEV and lactate/malate dehydrogenase domains                                                              |
| 6.9 | 219511_s_at  |   | SNCAIP                        | synuclein, alpha interacting protein                                                                      |
| 6.9 | 231083_at    | D | ETV5                          | ets variant 5                                                                                             |
| 6.8 | 38037_at     |   | HBEGF                         | heparin-binding EGF-like growth factor                                                                    |
| 6.8 | 210426_x_at  | D | RORA                          | RAR-related orphan receptor A                                                                             |
| 6.8 | 200832_s_at  | D | SCD                           | stearoyl-CoA desaturase (delta-9-desaturase)                                                              |
| 6.8 | 217998_at    | D | PHLDA1                        | pleckstrin homology-like domain, family A, member 1                                                       |
| 6.8 | 212014_x_at  | D | CD44 (includes EG: 100330801) | CD44 molecule (Indian blood group)                                                                        |
| 6.8 | 232073_at    |   | PPFIA2                        | protein tyrosine phosphatase, receptor type, f polypeptide (PTPRF), interacting protein (liprin), alpha 2 |
| 6.8 | 206714_at    | D | ALOX15B                       | arachidonate 15-lipoxygenase, type B                                                                      |
| 6.8 | 217767_at    |   | C3                            | complement component 3                                                                                    |
| 6.8 | 205960_at    |   | PDK4                          | pyruvate dehydrogenase kinase, isozyme 4                                                                  |
| 6.7 | 202068_s_at  |   | LDLR                          | low density lipoprotein receptor                                                                          |
| 6.7 | 1565525_a_at | D | TCP11L2                       | t-complex 11 (mouse)-like 2                                                                               |
| 6.7 | 219564_at    |   | KCNJ16                        | potassium inwardly-rectifying channel, subfamily J, member 16                                             |
| 6.7 | 206197_at    |   | NME5                          | non-metastatic cells 5, protein expressed in (nucleoside-diphosphate kinase)                              |
| 6.7 | 229177_at    |   | C16orf89                      | chromosome 16 open reading frame 89                                                                       |
| 6.7 | 1559517_a_at | D | SPIRE1                        | spire homolog 1 (Drosophila)                                                                              |
| 6.7 | 221748_s_at  | D | TNS1                          | tensin 1                                                                                                  |
| 6.7 | 209230_s_at  |   | NUPR1                         | nuclear protein, transcriptional regulator, 1                                                             |
| 6.7 | 204597_x_at  |   | STC1                          | stanniocalcin 1                                                                                           |
| 6.7 | 228762_at    |   | LFNG                          | LFNG O-fucosylpeptide 3-beta-N-acetylglucosaminyltransferase                                              |
| 6.6 | 1553533_at   |   | JPH1                          | junctophilin 1                                                                                            |
| 6.6 | 206119_at    |   | BHMT                          | betaine--homocysteine S-methyltransferase                                                                 |
| 6.6 | 228565_at    |   | KIAA1804                      | mixed lineage kinase 4                                                                                    |
| 6.6 | 229638_at    |   | IRX3                          | iroquois homeobox 3                                                                                       |
| 6.6 | 219478_at    |   | WFDC1                         | WAP four-disulfide core domain 1                                                                          |
| 6.6 | 226098_at    |   | IFT80                         | intraflagellar transport 80 homolog (Chlamydomonas)                                                       |

Hui L, Wick HC, Edlow AG, Cowan JM, Bianchi DJW. Global gene expression analysis of term amniotic fluid cell-free fetal RNA *Obstet Gynecol* 2013;121.

The authors provided this information as a supplement to their article.

© Copyright 2013 American College of Obstetricians and Gynecologists.



|     |              |   |                            |                                                                                 |
|-----|--------------|---|----------------------------|---------------------------------------------------------------------------------|
| 6.6 | 200600_at    |   | MSN                        | moesin                                                                          |
| 6.6 | 227253_at    | D | CP                         | ceruloplasmin (ferroxidase)                                                     |
| 6.6 | 212096_s_at  | D | MTUS1                      | microtubule associated tumor suppressor 1                                       |
| 6.6 | 222771_s_at  | D | MYEF2                      | myelin expression factor 2                                                      |
| 6.6 | 228051_at    | D | KIAA1244                   | KIAA1244                                                                        |
| 6.6 | 233882_s_at  |   | SEMA6D                     | sema domain, transmembrane domain (TM), and cytoplasmic domain, (semaphorin) 6D |
| 6.5 | 1554824_at   |   | ZNF585A                    | zinc finger protein 585A                                                        |
| 6.5 | 214354_x_at  | D | SFTPB                      | surfactant protein B                                                            |
| 6.5 | 226333_at    |   | IL6R                       | interleukin 6 receptor                                                          |
| 6.5 | 208234_x_at  | D | FGFR2                      | fibroblast growth factor receptor 2                                             |
| 6.5 | 229930_at    |   | LOC100134361               | uncharacterized LOC100134361                                                    |
| 6.5 | 225728_at    |   | SORBS2                     | sorbin and SH3 domain containing 2                                              |
| 6.5 | 206054_at    |   | KNG1                       | kininogen 1                                                                     |
| 6.5 | 210239_at    |   | IRX5                       | iroquois homeobox 5                                                             |
| 6.5 | 231747_at    |   | CYSLTR1                    | cysteinyl leukotriene receptor 1                                                |
| 6.5 | 236241_at    |   | MED31                      | mediator complex subunit 31                                                     |
| 6.5 | 230309_at    | D | BHMT2                      | betaine--homocysteine S-methyltransferase 2                                     |
| 6.5 | 241604_at    | D | ATP11A                     | ATPase, class VI, type 11A                                                      |
| 6.4 | 205442_at    |   | MFAP3L                     | microfibrillar-associated protein 3-like                                        |
| 6.4 | 1556183_at   |   | ANKRD36BP2                 | ankyrin repeat domain 36B pseudogene 2                                          |
| 6.4 | 240183_at    | D | TMEM213                    | transmembrane protein 213                                                       |
| 6.4 | 213442_x_at  | D | SPDEF                      | SAM pointed domain containing ets transcription factor                          |
| 6.4 | 229969_at    | D | SEC63 (includes EG: 11231) | SEC63 homolog (S. cerevisiae)                                                   |
| 6.4 | 220168_at    |   | CASC1                      | cancer susceptibility candidate 1                                               |
| 6.4 | 217967_s_at  | D | FAM129A                    | family with sequence similarity 129, member A                                   |
| 6.4 | 1559167_x_at |   | MPV17L                     | MPV17 mitochondrial membrane protein-like                                       |
| 6.4 | 241713_s_at  |   | DYX1C1                     | dyslexia susceptibility 1 candidate 1                                           |
| 6.4 | 217076_s_at  | D | HOXD3                      | homeobox D3                                                                     |
| 6.4 | 231348_s_at  | D | LMO3                       | LIM domain only 3 (rhombotin-like 2)                                            |
| 6.4 | 225045_at    |   | CCDC88A                    | coiled-coil domain containing 88A                                               |
| 6.4 | 212935_at    | D | MCF2L                      | MCF.2 cell line derived transforming sequence-like                              |
| 6.3 | 1552449_a_at |   | LOC653486/SCGB1C1          | secretoglobin, family 1C, member 1                                              |
| 6.3 | 204115_at    |   | GNG11                      | guanine nucleotide binding protein (G protein), gamma 11                        |
| 6.3 | 242985_x_at  |   | RNF180                     | ring finger protein 180                                                         |
| 6.3 | 225924_at    | D | FNIP2                      | folliculin interacting protein 2                                                |
| 6.3 | 1554001_at   | D | TRIM37                     | tripartite motif containing 37                                                  |
| 6.3 | 235733_at    | D | GXYLT2                     | glucoside xylosyltransferase 2                                                  |
| 6.3 | 226377_at    | D | NFIC                       | nuclear factor I/C (CCAAT-binding transcription factor)                         |
| 6.3 | 208250_s_at  |   | DMBT1                      | deleted in malignant brain tumors 1                                             |
| 6.3 | 220609_at    |   | LOC202181                  | chromosome 5 open reading frame 25 pseudogene                                   |
| 6.3 | 210652_s_at  |   | TTC39A                     | tetratricopeptide repeat domain 39A                                             |
| 6.2 | 215184_at    | D | DAPK2                      | death-associated protein kinase 2                                               |
| 6.2 | 217550_at    |   | ATF6                       | activating transcription factor 6                                               |

Hui L, Wick HC, Edlow AG, Cowan JM, Bianchi DJW. Global gene expression analysis of term amniotic fluid cell-free fetal RNA *Obstet Gynecol* 2013;121.

The authors provided this information as a supplement to their article.

© Copyright 2013 American College of Obstetricians and Gynecologists.

|     |              |   |                              |                                                                                    |
|-----|--------------|---|------------------------------|------------------------------------------------------------------------------------|
| 6.2 | 215216_at    |   | VPS16 (includes EG:296159)   | vacuolar protein sorting 16 homolog ( <i>S. cerevisiae</i> )                       |
| 6.2 | 211323_s_at  | D | ITPR1                        | inositol 1,4,5-trisphosphate receptor, type 1                                      |
| 6.2 | 1554541_a_at | D | GPRIN2                       | G protein regulated inducer of neurite outgrowth 2                                 |
| 6.2 | 209792_s_at  | D | KLK10                        | kallikrein-related peptidase 10                                                    |
| 6.2 | 207277_at    |   | CD209                        | CD209 molecule                                                                     |
| 6.2 | 1560712_at   |   | TMPRSS11B                    | transmembrane protease, serine 11B                                                 |
| 6.2 | 239380_at    |   | C5orf27                      | chromosome 5 open reading frame 27                                                 |
| 6.2 | 220962_s_at  |   | PADI1                        | peptidyl arginine deiminase, type I                                                |
| 6.2 | 239381_at    | D | KLK7                         | kallikrein-related peptidase 7                                                     |
| 6.2 | 1564000_at   |   | ANKRD31                      | ankyrin repeat domain 31                                                           |
| 6.1 | 210831_s_at  | D | PTGER3                       | prostaglandin E receptor 3 (subtype EP3)                                           |
| 6.1 | 209716_at    |   | CSF1 (includes EG:12977)     | colony stimulating factor 1 (macrophage) microtubule associated tumor suppressor 1 |
| 6.1 | 212093_s_at  | D | MTUS1                        |                                                                                    |
| 6.1 | 209732_at    |   | CLEC2B                       | C-type lectin domain family 2, member B                                            |
| 6.1 | 202510_s_at  |   | TNFAIP2                      | tumor necrosis factor, alpha-induced protein 2                                     |
| 6.1 | 221950_at    |   | EMX2                         | empty spiracles homeobox 2                                                         |
| 6.1 | 244121_at    |   | UBR3                         | ubiquitin protein ligase E3 component n-recognin 3 (putative)                      |
| 6.1 | 211267_at    |   | HESX1                        | HESX homeobox 1                                                                    |
| 6.1 | 236266_at    | D | RORA                         | RAR-related orphan receptor A                                                      |
| 6.0 | 210916_s_at  | D | CD44 (includes EG:100330801) | CD44 molecule (Indian blood group)                                                 |
| 6.0 | 243967_at    | D | AFF3                         | AF4/FMR2 family, member 3                                                          |
| 6.0 | 213298_at    | D | NFIC                         | nuclear factor I/C (CCAAT-binding transcription factor)                            |
| 6.0 | 213802_at    |   | PRSS12                       | protease, serine, 12 (neurotrypsin, motopsin)                                      |
| 6.0 | 212325_at    | D | LIMCH1                       | LIM and calponin homology domains 1                                                |
| 6.0 | 235643_at    |   | SAMD9L                       | sterile alpha motif domain containing 9-like                                       |
| 6.0 | 207542_s_at  | D | AQP1                         | aquaporin 1 (Colton blood group)                                                   |
| 6.0 | 1563887_at   |   | INTS4L1                      | integrator complex subunit 4-like 1                                                |
| 6.0 | 214321_at    |   | NOV                          | nephroblastoma overexpressed                                                       |
| 6.0 | 227408_s_at  | D | SNX25                        | sorting nexin 25                                                                   |
| 6.0 | 218974_at    |   | SOBP                         | sine oculis binding protein homolog ( <i>Drosophila</i> )                          |
| 5.9 | 209807_s_at  | D | NFIX                         | nuclear factor I/X (CCAAT-binding transcription factor)                            |
| 5.9 | 1554508_at   | D | PIK3AP1                      | phosphoinositide-3-kinase adaptor protein 1                                        |
| 5.9 | 238755_at    |   | RASSF10                      | Ras association (RalGDS/AF-6) domain family (N-terminal) member 10                 |
| 5.9 | 205627_at    |   | CDA                          | cytidine deaminase                                                                 |
| 5.9 | 203638_s_at  | D | FGFR2                        | fibroblast growth factor receptor 2                                                |
| 5.9 | 209309_at    | D | AZGP1                        | alpha-2-glycoprotein 1, zinc-binding                                               |
| 5.9 | 210068_s_at  | D | AQP4                         | aquaporin 4                                                                        |
| 5.9 | 201943_s_at  |   | CPD                          | carboxypeptidase D                                                                 |
| 5.8 | 212311_at    | D | SEL1L3                       | sel-1 suppressor of lin-12-like 3 ( <i>C. elegans</i> )                            |
| 5.8 | 241174_at    |   | AP4E1                        | adaptor-related protein complex 4, epsilon 1 subunit                               |

Hui L, Wick HC, Edlow AG, Cowan JM, Bianchi DJW. Global gene expression analysis of term amniotic fluid cell-free fetal RNA *Obstet Gynecol* 2013;121.

The authors provided this information as a supplement to their article.

© Copyright 2013 American College of Obstetricians and Gynecologists.

|     |              |   |                            |                                                                                                              |
|-----|--------------|---|----------------------------|--------------------------------------------------------------------------------------------------------------|
| 5.8 | 1569608_x_at |   | ANKRD20A9P                 | ankyrin repeat domain 20 family, member A9, pseudogene                                                       |
| 5.8 | 218530_at    |   | FHOD1                      | formin homology 2 domain containing 1                                                                        |
| 5.8 | 213644_at    |   | CEP112                     | centrosomal protein 112kDa                                                                                   |
| 5.8 | 205513_at    |   | TCN1                       | transcobalamin I (vitamin B12 binding protein, R binder family)                                              |
| 5.8 | 227039_at    | D | AKAP13                     | A kinase (PRKA) anchor protein 13                                                                            |
| 5.8 | 216933_x_at  |   | APC                        | adenomatous polyposis coli                                                                                   |
| 5.8 | 223510_at    | D | NRP2                       | neuropilin 2                                                                                                 |
| 5.8 | 238430_x_at  | D | SLFN5                      | schlafen family member 5                                                                                     |
| 5.8 | 205334_at    |   | S100A1                     | S100 calcium binding protein A1                                                                              |
| 5.8 | 211654_x_at  | D | HLA-DQB1                   | major histocompatibility complex, class II, DQ beta 1                                                        |
| 5.7 | 226310_at    |   | RICTOR                     | RPTOR independent companion of MTOR, complex 2                                                               |
| 5.7 | 204268_at    |   | S100A2                     | S100 calcium binding protein A2                                                                              |
| 5.7 | 216074_x_at  | D | WWC1                       | WW and C2 domain containing 1                                                                                |
| 5.7 | 235948_at    |   | RIMKLA                     | ribosomal modification protein rimK-like family member A                                                     |
| 5.7 | 1553845_x_at | D | C10orf67                   | chromosome 10 open reading frame 67                                                                          |
| 5.7 | 223541_at    |   | HAS3                       | hyaluronan synthase 3                                                                                        |
| 5.7 | 229831_at    |   | CNTN3                      | contactin 3 (plasmacytoma associated)                                                                        |
| 5.7 | 215702_s_at  |   | CFTR                       | cystic fibrosis transmembrane conductance regulator (ATP-binding cassette sub-family C, member 7)            |
| 5.7 | 204542_at    |   | ST6GALNAC2                 | ST6 (alpha-N-acetylneuraminyl-2,3-beta-galactosyl-1,3)-N-acetylgalactosaminide alpha-2,6-sialyltransferase 2 |
| 5.7 | 1555142_at   |   | SLC9B1                     | solute carrier family 9, subfamily B (NHA1, cation proton antiporter 1), member 1                            |
| 5.7 | 205756_s_at  |   | F8                         | coagulation factor VIII, procoagulant component                                                              |
| 5.7 | 219799_s_at  | D | DHRS9                      | dehydrogenase/reductase (SDR family) member 9                                                                |
| 5.7 | 223806_s_at  |   | NAPSA                      | napsin A aspartic peptidase                                                                                  |
| 5.7 | 228806_at    | D | RORC                       | RAR-related orphan receptor C                                                                                |
| 5.6 | 219270_at    |   | CHAC1                      | ChaC, cation transport regulator homolog 1 (E. coli)                                                         |
| 5.6 | 240838_s_at  |   | LOC145837                  | uncharacterized LOC145837                                                                                    |
| 5.6 | 227194_at    |   | FAM3B                      | family with sequence similarity 3, member B                                                                  |
| 5.6 | 211991_s_at  |   | HLA-DPA1                   | major histocompatibility complex, class II, DP alpha 1                                                       |
| 5.6 | 220406_at    | D | TGFB2                      | transforming growth factor, beta 2                                                                           |
| 5.6 | 207861_at    |   | CCL22                      | chemokine (C-C motif) ligand 22                                                                              |
| 5.6 | 1557042_at   |   | KCNQ3                      | potassium voltage-gated channel, KQT-like subfamily, member 3                                                |
| 5.6 | 229821_at    | D | LRRC37A3 (includes others) | leucine rich repeat containing 37, member A3                                                                 |
| 5.6 | 224995_at    | D | SPIRE1                     | spire homolog 1 (Drosophila)                                                                                 |
| 5.6 | 221246_x_at  | D | TNS1                       | tensin 1                                                                                                     |
| 5.6 | 206595_at    |   | CST6 (includes EG:1474)    | cystatin E/M                                                                                                 |
| 5.5 | 218211_s_at  |   | MLPH                       | melanophilin                                                                                                 |
| 5.5 | 227919_at    |   | UCA1                       | urothelial cancer associated 1 (non-protein coding)                                                          |

Hui L, Wick HC, Edlow AG, Cowan JM, Bianchi DJW. Global gene expression analysis of term amniotic fluid cell-free fetal RNA *Obstet Gynecol* 2013;121.

The authors provided this information as a supplement to their article.

© Copyright 2013 American College of Obstetricians and Gynecologists.

|     |              |   |          |                                                                                                   |
|-----|--------------|---|----------|---------------------------------------------------------------------------------------------------|
| 5.5 | 213243_at    | D | VPS13B   | vacuolar protein sorting 13 homolog B (yeast)                                                     |
| 5.5 | 206199_at    |   | CEACAM7  | carcinoembryonic antigen-related cell adhesion molecule 7                                         |
| 5.5 | 212531_at    |   | LCN2     | lipocalin 2                                                                                       |
| 5.5 | 219849_at    |   | ZNF671   | zinc finger protein 671                                                                           |
| 5.5 | 236225_at    |   | GGT6     | gamma-glutamyltransferase 6                                                                       |
| 5.5 | 218000_s_at  | D | PHLDA1   | pleckstrin homology-like domain, family A, member 1                                               |
| 5.5 | 207605_x_at  |   | ZNF117   | zinc finger protein 117                                                                           |
| 5.5 | 217292_at    |   | MTMR7    | myotubularin related protein 7                                                                    |
| 5.4 | 230102_at    | D | ETV5     | ets variant 5                                                                                     |
| 5.4 | 203453_at    | D | SCNN1A   | sodium channel, non-voltage-gated 1 alpha subunit                                                 |
| 5.4 | 243818_at    |   | SFTA1P   | surfactant associated 1, pseudogene                                                               |
| 5.4 | 205009_at    |   | TFF1     | trefoil factor 1                                                                                  |
| 5.4 | 225645_at    | D | EHF      | ets homologous factor                                                                             |
| 5.4 | 235845_at    |   | SP5      | Sp5 transcription factor                                                                          |
| 5.4 | 200831_s_at  | D | SCD      | stearoyl-CoA desaturase (delta-9-desaturase)                                                      |
| 5.4 | 217557_s_at  | D | CPM      | carboxypeptidase M                                                                                |
| 5.4 | 203217_s_at  | D | ST3GAL5  | ST3 beta-galactoside alpha-2,3-sialyltransferase 5                                                |
| 5.4 | 211708_s_at  | D | SCD      | stearoyl-CoA desaturase (delta-9-desaturase)                                                      |
| 5.4 | 214433_s_at  | D | SELENBP1 | selenium binding protein 1                                                                        |
| 5.4 | 1562226_at   |   | VWDE     | von Willebrand factor D and EGF domains                                                           |
| 5.4 | 204733_at    |   | KLK6     | kallikrein-related peptidase 6                                                                    |
| 5.4 | 240304_s_at  |   | TMC5     | transmembrane channel-like 5                                                                      |
| 5.3 | 229477_at    | D | THRSP    | thyroid hormone responsive                                                                        |
| 5.3 | 228568_at    |   | GCOM1    | GRINL1A complex locus 1                                                                           |
| 5.3 | 232207_at    |   | GUSBP4   | glucuronidase, beta pseudogene 4                                                                  |
| 5.3 | 205646_s_at  |   | PAX6     | paired box 6                                                                                      |
| 5.3 | 202464_s_at  |   | PFKFB3   | 6-phosphofructo-2-kinase/fructose-2,6-biphosphatase 3                                             |
| 5.3 | 206558_at    |   | SIM2     | single-minded homolog 2 (Drosophila)                                                              |
| 5.3 | 200856_x_at  |   | NCOR1    | nuclear receptor corepressor 1                                                                    |
| 5.3 | 226922_at    | D | RANBP2   | RAN binding protein 2                                                                             |
| 5.3 | 1561973_at   |   | SMARCC2  | SWI/SNF related, matrix associated, actin dependent regulator of chromatin, subfamily c, member 2 |
| 5.3 | 225922_at    | D | FNIP2    | folliculin interacting protein 2                                                                  |
| 5.3 | 1554807_a_at | D | SPIRE1   | spire homolog 1 (Drosophila)                                                                      |
| 5.3 | 217966_s_at  | D | FAM129A  | family with sequence similarity 129, member A                                                     |
| 5.3 | 226895_at    | D | NFIC     | nuclear factor I/C (CCAAT-binding transcription factor)                                           |
| 5.3 | 215563_s_at  |   | MST1P9   | macrophage stimulating 1 (hepatocyte growth factor-like) pseudogene 9                             |
| 5.2 | 238125_at    |   | ADAMTS16 | ADAM metallopeptidase with thrombospondin type 1 motif, 16                                        |
| 5.2 | 201604_s_at  |   | PPP1R12A | protein phosphatase 1, regulatory subunit 12A                                                     |
| 5.2 | 233134_at    |   | RPH3AL   | rabphilin 3A-like (without C2 domains)                                                            |
| 5.2 | 207902_at    |   | IL5RA    | interleukin 5 receptor, alpha                                                                     |
| 5.2 | 1558293_at   |   | KIAA1107 | KIAA1107                                                                                          |
| 5.2 | 228575_at    |   | IL20RB   | interleukin 20 receptor beta                                                                      |

Hui L, Wick HC, Edlow AG, Cowan JM, Bianchi DJW. Global gene expression analysis of term amniotic fluid cell-free fetal RNA *Obstet Gynecol* 2013;121.

The authors provided this information as a supplement to their article.

© Copyright 2013 American College of Obstetricians and Gynecologists.

|     |              |   |              |                                                                                               |
|-----|--------------|---|--------------|-----------------------------------------------------------------------------------------------|
| 5.2 | 202156_s_at  | D | CELF2        | CUGBP, Elav-like family member 2                                                              |
| 5.2 | 206553_at    |   | OAS2         | 2'-5'-oligoadenylate synthetase 2, 69/71kDa                                                   |
| 5.2 | 202523_s_at  |   | SPOCK2       | sparc/osteonectin, cwcv and kazal-like domains proteoglycan (testican) 2                      |
| 5.2 | 213447_at    |   | IPW          | imprinted in Prader-Willi syndrome (non-protein coding)                                       |
| 5.2 | 206501_x_at  | D | ETV1         | ets variant 1                                                                                 |
| 5.2 | 219298_at    |   | ECHDC3       | enoyl CoA hydratase domain containing 3                                                       |
| 5.2 | 1553033_at   |   | SYTL5        | synaptotagmin-like 5                                                                          |
| 5.2 | 226553_at    |   | TMPRSS2      | transmembrane protease, serine 2                                                              |
| 5.2 | 227707_at    | D | MYLIP        | myosin regulatory light chain interacting protein                                             |
| 5.2 | 220999_s_at  | D | CYFIP2       | cytoplasmic FMR1 interacting protein 2                                                        |
| 5.2 | 1553705_a_at |   | CHRM3        | cholinergic receptor, muscarinic 3                                                            |
| 5.1 | 219630_at    | D | PDZK1IP1     | PDZK1 interacting protein 1                                                                   |
| 5.1 | 217478_s_at  |   | HLA-DMA      | major histocompatibility complex, class II, DM alpha                                          |
| 5.1 | 201605_x_at  |   | CNN2         | calponin 2                                                                                    |
| 5.1 | 242372_s_at  | D | MFSD4        | major facilitator superfamily domain containing 4                                             |
| 5.1 | 1559988_at   | D | ZNF483       | zinc finger protein 483                                                                       |
| 5.1 | 218775_s_at  | D | WWC2         | WW and C2 domain containing 2                                                                 |
| 5.1 | 211695_x_at  | D | MUC1         | mucin 1, cell surface associated                                                              |
| 5.1 | 205489_at    |   | CRYM         | crystallin, mu                                                                                |
| 5.0 | 205414_s_at  |   | ARHGAP44     | Rho GTPase activating protein 44                                                              |
| 5.0 | 239593_at    | D | TMEM213      | transmembrane protein 213                                                                     |
| 5.0 | 1560767_at   |   | HCG22        | HLA complex group 22 (non-protein coding)                                                     |
| 5.0 | 241752_at    | D | SLC8A1       | solute carrier family 8 (sodium/calcium exchanger), member 1                                  |
| 5.0 | 201626_at    | D | INSIG1       | insulin induced gene 1                                                                        |
| 5.0 | 211163_s_at  | D | TNFRSF10C    | tumor necrosis factor receptor superfamily, member 10c, decoy without an intracellular domain |
| 5.0 | 1561615_s_at | D | SLC8A1       | solute carrier family 8 (sodium/calcium exchanger), member 1                                  |
| 5.0 | 207345_at    |   | FST          | follicle-stimulating hormone receptor 1                                                       |
| 5.0 | 203498_at    |   | RCAN2        | regulator of calcineurin 2                                                                    |
| 5.0 | 236037_at    | D | KIAA1244     | KIAA1244                                                                                      |
| 4.9 | 231646_at    |   | DPCR1        | diffuse panbronchiolitis critical region 1                                                    |
| 4.9 | 206251_s_at  |   | AVPR1A       | arginine vasopressin receptor 1A                                                              |
| 4.9 | 231540_at    |   | LOC100130691 | uncharacterized LOC100130691                                                                  |
| 4.9 | 218507_at    | D | HILPDA       | hypoxia inducible lipid droplet-associated                                                    |
| 4.9 | 1554606_at   |   | CEP120       | centrosomal protein 120kDa                                                                    |
| 4.9 | 208237_x_at  |   | ADAM22       | ADAM metalloproteinase domain 22                                                              |
| 4.9 | 1553239_at   |   | FAM124A      | family with sequence similarity 124A                                                          |
| 4.9 | 205299_s_at  |   | BTN2A2       | butyrophilin, subfamily 2, member A2                                                          |
| 4.9 | 1555336_a_at |   | ITGA9        | integrin, alpha 9                                                                             |
| 4.9 | 205206_at    |   | KAL1         | Kallmann syndrome 1 sequence                                                                  |
| 4.9 | 223874_at    |   | ACTR3C       | ARP3 actin-related protein 3 homolog C (yeast)                                                |
| 4.9 | 1554452_a_at | D | HILPDA       | hypoxia inducible lipid droplet-associated                                                    |
| 4.9 | 214229_at    | D | DNAH17       | dynein, axonemal, heavy chain 17                                                              |
| 4.9 | 222496_s_at  | D | RBM47        | RNA binding motif protein 47                                                                  |
| 4.9 | 235759_at    | D | LOC100127983 | uncharacterized LOC100127983                                                                  |

Hui L, Wick HC, Edlow AG, Cowan JM, Bianchi DJW. Global gene expression analysis of term amniotic fluid cell-free fetal RNA *Obstet Gynecol* 2013;121.

The authors provided this information as a supplement to their article.

© Copyright 2013 American College of Obstetricians and Gynecologists.

|     |              |   |                            |                                                                                         |
|-----|--------------|---|----------------------------|-----------------------------------------------------------------------------------------|
| 4.9 | 207059_at    |   | PAX9                       | paired box 9                                                                            |
| 4.9 | 211024_s_at  | D | NKX2-1                     | NK2 homeobox 1                                                                          |
| 4.9 | 208498_s_at  |   | AMY1A (includes others)    | amylase, alpha 1A (salivary)                                                            |
| 4.9 | 35147_at     | D | MCF2L                      | MCF.2 cell line derived transforming sequence-like                                      |
| 4.9 | 215223_s_at  | D | SOD2                       | superoxide dismutase 2, mitochondrial                                                   |
| 4.9 | 229659_s_at  | D | PIGR                       | polymeric immunoglobulin receptor                                                       |
| 4.8 | 204204_at    |   | SLC31A2                    | solute carrier family 31 (copper transporters), member 2                                |
| 4.8 | 1555388_s_at | D | SNX25                      | sorting nexin 25                                                                        |
| 4.8 | 1554462_a_at |   | DNAJB9                     | DnaJ (Hsp40) homolog, subfamily B, member 9                                             |
| 4.8 | 216462_at    |   | SS18                       | synovial sarcoma translocation, chromosome 18                                           |
| 4.8 | 233550_s_at  |   | SLC4A11                    | solute carrier family 4, sodium borate transporter, member 11                           |
| 4.8 | 230931_at    |   | PLG                        | plasminogen                                                                             |
| 4.8 | 211657_at    |   | CEACAM1 (includes others)  | carcinoembryonic antigen-related cell adhesion molecule 1 (biliary glycoprotein)        |
| 4.8 | 212195_at    | D | IL6ST                      | interleukin 6 signal transducer (gp130, oncostatin M receptor)                          |
| 4.8 | 1566605_at   | D | TEX9                       | testis expressed 9                                                                      |
| 4.8 | 204498_s_at  |   | ADCY9                      | adenylate cyclase 9                                                                     |
| 4.8 | 206275_s_at  | D | MICAL2                     | microtubule associated monooxygenase, calponin and LIM domain containing 2              |
| 4.8 | 237058_x_at  |   | SLC6A13                    | solute carrier family 6 (neurotransmitter transporter, GABA), member 13                 |
| 4.8 | 1557290_at   |   | DPY19L2P1                  | dpy-19-like 2 pseudogene 1 (C. elegans)                                                 |
| 4.8 | 238285_at    | D | SOX5                       | SRY (sex determining region Y)-box 5                                                    |
| 4.8 | 218966_at    |   | MYO5C                      | myosin VC                                                                               |
| 4.8 | 226420_at    | D | MECOM                      | MDS1 and EVI1 complex locus                                                             |
| 4.8 | 235747_at    | D | SLC25A16                   | solute carrier family 25 (mitochondrial carrier; Graves disease autoantigen), member 16 |
| 4.8 | 218627_at    |   | DRAM1                      | DNA-damage regulated autophagy modulator 1                                              |
| 4.8 | 226438_at    |   | SNTB1                      | syntrophin, beta 1 (dystrophin-associated protein A1, 59kDa, basic component 1)         |
| 4.8 | 238454_at    |   | ZNF540                     | zinc finger protein 540                                                                 |
| 4.7 | 230875_s_at  | D | ATP11A                     | ATPase, class VI, type 11A                                                              |
| 4.7 | 210833_at    | D | PTGER3                     | prostaglandin E receptor 3 (subtype EP3)                                                |
| 4.7 | 205817_at    | D | SIX1                       | SIX homeobox 1                                                                          |
| 4.7 | 214651_s_at  |   | HOXA9                      | homeobox A9                                                                             |
| 4.7 | 237280_at    |   | TCTE1                      | t-complex-associated-testis-expressed 1                                                 |
| 4.7 | 227178_at    | D | CELF2                      | CUGBP, Elav-like family member 2                                                        |
| 4.7 | 211494_s_at  |   | SLC4A4                     | solute carrier family 4, sodium bicarbonate cotransporter, member 4                     |
| 4.7 | 220220_at    | D | LRRC37A3 (includes others) | leucine rich repeat containing 37, member A3                                            |
| 4.7 | 207629_s_at  | D | ARHGEF2                    | Rho/Rac guanine nucleotide exchange factor (GEF) 2                                      |
| 4.7 | 220542_s_at  |   | BPIFA1                     | BPI fold containing family A, member 1                                                  |
| 4.7 | 209619_at    | D | CD74                       | CD74 molecule, major histocompatibility complex, class II invariant chain               |

Hui L, Wick HC, Edlow AG, Cowan JM, Bianchi DJW. Global gene expression analysis of term amniotic fluid cell-free fetal RNA *Obstet Gynecol* 2013;121.

The authors provided this information as a supplement to their article.

© Copyright 2013 American College of Obstetricians and Gynecologists.

|     |              |   |                            |                                                                                       |
|-----|--------------|---|----------------------------|---------------------------------------------------------------------------------------|
| 4.7 | 225478_at    | D | MFHAS1                     | malignant fibrous histiocytoma amplified sequence 1                                   |
| 4.7 | 244764_at    |   | HIVEP3                     | human immunodeficiency virus type 1 enhancer binding protein 3                        |
| 4.7 | 204748_at    | D | PTGS2                      | prostaglandin-endoperoxide synthase 2 (prostaglandin G/H synthase and cyclooxygenase) |
| 4.7 | 202893_at    |   | UNC13B                     | unc-13 homolog B ( <i>C. elegans</i> )                                                |
| 4.7 | 225532_at    |   | CABLES1                    | Cdk5 and Abl enzyme substrate 1                                                       |
| 4.6 | 206301_at    |   | TEC (includes EG:21682)    | tec protein tyrosine kinase                                                           |
| 4.6 | 214403_x_at  | D | SPDEF                      | SAM pointed domain containing ets transcription factor                                |
| 4.6 | 231906_at    |   | HOXD8                      | homeobox D8                                                                           |
| 4.6 | 213900_at    |   | FAM189A2                   | family with sequence similarity 189, member A2                                        |
| 4.6 | 227556_at    |   | NME7                       | non-metastatic cells 7, protein expressed in (nucleoside-diphosphate kinase)          |
| 4.6 | 232317_at    |   | PLXNA4                     | plexin A4                                                                             |
| 4.6 | 223063_at    |   | C1orf198                   | chromosome 1 open reading frame 198                                                   |
| 4.6 | 225548_at    | D | SHROOM3                    | shroom family member 3                                                                |
| 4.6 | 1554205_s_at | D | ICA1L                      | islet cell autoantigen 1,69kDa-like phosphodiesterase 1A, calmodulin-dependent        |
| 4.6 | 242789_at    |   | PDE1A                      |                                                                                       |
| 4.6 | 1553589_a_at | D | PDZK1IP1                   | PDZK1 interacting protein 1                                                           |
| 4.6 | 1555416_a_at | D | ALOX15B                    | arachidonate 15-lipoxygenase, type B                                                  |
| 4.6 | 205396_at    |   | SMAD3                      | SMAD family member 3                                                                  |
| 4.6 | 220098_at    |   | HYDIN                      | HYDIN, axonemal central pair apparatus protein                                        |
| 4.6 | 240890_at    |   | LOC643733                  | caspase 4, apoptosis-related cysteine peptidase pseudogene                            |
| 4.6 | 202805_s_at  |   | ABCC1                      | ATP-binding cassette, sub-family C (CFTR/MRP), member 1                               |
| 4.6 | 209234_at    |   | KIF1B                      | kinesin family member 1B                                                              |
| 4.6 | 214617_at    |   | PRF1                       | perforin 1 (pore forming protein)                                                     |
| 4.6 | 218396_at    |   | VPS13C                     | vacuolar protein sorting 13 homolog C ( <i>S. cerevisiae</i> )                        |
| 4.5 | 244692_at    |   | CYP4F22                    | cytochrome P450, family 4, subfamily F, polypeptide 22                                |
| 4.5 | 203387_s_at  |   | TBC1D4                     | TBC1 domain family, member 4                                                          |
| 4.5 | 225731_at    |   | ANKRD50                    | ankyrin repeat domain 50                                                              |
| 4.5 | 203710_at    | D | ITPR1                      | inositol 1,4,5-trisphosphate receptor, type 1                                         |
| 4.5 | 212538_at    | D | DOCK9                      | dedicator of cytokinesis 9                                                            |
| 4.5 | 232899_at    |   | FAM41C                     | family with sequence similarity 41, member C                                          |
| 4.5 | 222892_s_at  |   | TMEM40                     | transmembrane protein 40                                                              |
| 4.5 | 209515_s_at  | D | RAB27A                     | RAB27A, member RAS oncogene family                                                    |
| 4.5 | 1570534_a_at | D | ZNF483                     | zinc finger protein 483                                                               |
| 4.5 | 1553436_at   |   | MUC19 (includes EG:239611) | mucin 19, oligomeric                                                                  |
| 4.4 | 1558807_at   |   | ATAD2B                     | ATPase family, AAA domain containing 2B                                               |
| 4.4 | 1559326_at   | D | DIO3OS                     | DIO3 opposite strand/antisense RNA (non-protein coding)                               |
| 4.4 | 213956_at    | D | CEP350                     | centrosomal protein 350kDa                                                            |
| 4.4 | 202372_at    |   | RAB3GAP2                   | RAB3 GTPase activating protein subunit 2 (non-catalytic)                              |

Hui L, Wick HC, Edlow AG, Cowan JM, Bianchi DJW. Global gene expression analysis of term amniotic fluid cell-free fetal RNA *Obstet Gynecol* 2013;121.

The authors provided this information as a supplement to their article.

© Copyright 2013 American College of Obstetricians and Gynecologists.

|     |              |   |          |                                                                             |
|-----|--------------|---|----------|-----------------------------------------------------------------------------|
| 4.4 | 207434_s_at  |   | FXD2     | FXD domain containing ion transport regulator 2                             |
| 4.4 | 205470_s_at  |   | KLK11    | kallikrein-related peptidase 11                                             |
| 4.4 | 41856_at     |   | UNC5B    | unc-5 homolog B (C. elegans)                                                |
| 4.4 | 202053_s_at  | D | ALDH3A2  | aldehyde dehydrogenase 3 family, member A2                                  |
| 4.4 | 226003_at    | D | KIF21A   | kinesin family member 21A                                                   |
| 4.4 | 215193_x_at  |   | HLA-DRB1 | major histocompatibility complex, class II, DR beta 1                       |
| 4.4 | 203416_at    |   | CD53     | CD53 molecule                                                               |
| 4.4 | 201432_at    | D | CAT      | catalase                                                                    |
| 4.4 | 234337_at    |   | TTLL9    | tubulin tyrosine ligase-like family, member 9                               |
| 4.4 | 211081_s_at  |   | MAP4K5   | mitogen-activated protein kinase kinase kinase kinase 5                     |
| 4.4 | 204373_s_at  | D | CEP350   | centrosomal protein 350kDa                                                  |
| 4.4 | 1554789_a_at |   | PDE8B    | phosphodiesterase 8B                                                        |
| 4.3 | 233267_at    | D | SELENBP1 | selenium binding protein 1                                                  |
| 4.3 | 210057_at    |   | SMG1     | smg-1 homolog, phosphatidylinositol 3-kinase-related kinase (C. elegans)    |
| 4.3 | 217999_s_at  | D | PHLDA1   | pleckstrin homology-like domain, family A, member 1                         |
| 4.3 | 226960_at    |   | CXCL17   | chemokine (C-X-C motif) ligand 17                                           |
| 4.3 | 232676_x_at  | D | MYEF2    | myelin expression factor 2                                                  |
| 4.3 | 206929_s_at  | D | NFIC     | nuclear factor I/C (CCAAT-binding transcription factor)                     |
| 4.3 | 223422_s_at  |   | ARHGAP24 | Rho GTPase activating protein 24                                            |
| 4.3 | 211580_s_at  |   | PIK3R3   | phosphoinositide-3-kinase, regulatory subunit 3 (gamma)                     |
| 4.3 | 212202_s_at  | D | TMEM87A  | transmembrane protein 87A                                                   |
| 4.3 | 1562387_at   |   | C5orf42  | chromosome 5 open reading frame 42                                          |
| 4.3 | 203080_s_at  |   | BAZ2B    | bromodomain adjacent to zinc finger domain, 2B                              |
| 4.3 | 224307_x_at  | D | MAGI3    | membrane associated guanylate kinase, WW and PDZ domain containing 3        |
| 4.3 | 226352_at    |   | JMY      | junction mediating and regulatory protein, p53 cofactor                     |
| 4.3 | 204836_at    |   | GLDC     | glycine dehydrogenase (decarboxylating)                                     |
| 4.3 | 220623_s_at  |   | TSGA10   | testis specific, 10                                                         |
| 4.2 | 212975_at    |   | DENND3   | DENN/MADD domain containing 3                                               |
| 4.2 | 242088_at    | D | KLHL24   | kelch-like 24 (Drosophila)                                                  |
| 4.2 | 212552_at    |   | HPCAL1   | hippocalcin-like 1                                                          |
| 4.2 | 206324_s_at  | D | DAPK2    | death-associated protein kinase 2                                           |
| 4.2 | 222024_s_at  | D | AKAP13   | A kinase (PRKA) anchor protein 13                                           |
| 4.2 | 219157_at    |   | KLHL2    | kelch-like 2, Mayven (Drosophila)                                           |
| 4.2 | 226653_at    |   | MARK1    | MAP/microtubule affinity-regulating kinase 1                                |
| 4.2 | 202831_at    |   | GPX2     | glutathione peroxidase 2 (gastrointestinal)                                 |
| 4.2 | 236630_at    |   | AQP2     | aquaporin 2 (collecting duct)                                               |
| 4.2 | 201664_at    | D | SMC4     | structural maintenance of chromosomes 4                                     |
| 4.2 | 236519_at    |   | C9orf135 | chromosome 9 open reading frame 135                                         |
| 4.2 | 40284_at     |   | FOXA2    | forkhead box A2                                                             |
| 4.2 | 204404_at    |   | SLC12A2  | solute carrier family 12 (sodium/potassium/chloride transporters), member 2 |
| 4.2 | 212470_at    | D | SPAG9    | sperm associated antigen 9                                                  |
| 4.2 | 219227_at    |   | CCNJL    | cyclin J-like                                                               |

Hui L, Wick HC, Edlow AG, Cowan JM, Bianchi DJW. Global gene expression analysis of term amniotic fluid cell-free fetal RNA *Obstet Gynecol* 2013;121.

The authors provided this information as a supplement to their article.

© Copyright 2013 American College of Obstetricians and Gynecologists.



|     |              |   |                           |                                                                                                                            |
|-----|--------------|---|---------------------------|----------------------------------------------------------------------------------------------------------------------------|
| 4.2 | 208964_s_at  | D | FADS1                     | fatty acid desaturase 1                                                                                                    |
| 4.2 | 203917_at    |   | CXADR                     | coxsackie virus and adenovirus receptor                                                                                    |
| 4.2 | 1555409_a_at | D | MLL3                      | myeloid/lymphoid or mixed-lineage leukemia 3                                                                               |
| 4.2 | 212972_x_at  |   | APBB2                     | amyloid beta (A4) precursor protein-binding, family B, member 2                                                            |
| 4.2 | 210397_at    |   | DEFB1 (human)             | defensin, beta 1                                                                                                           |
| 4.2 | 219236_at    |   | PAQR6                     | progesterin and adipoQ receptor family member VI                                                                           |
| 4.2 | 208228_s_at  | D | FGFR2                     | fibroblast growth factor receptor 2                                                                                        |
| 4.2 | 226344_at    |   | ZMAT1                     | zinc finger, matrin-type 1                                                                                                 |
| 4.2 | 243770_at    | D | ZNF483                    | zinc finger protein 483                                                                                                    |
| 4.2 | 225327_at    |   | FAM214A                   | family with sequence similarity 214, member A                                                                              |
| 4.2 | 230958_s_at  | D | NFIA                      | nuclear factor I/A                                                                                                         |
| 4.2 | 204681_s_at  | D | RAPGEF5                   | Rap guanine nucleotide exchange factor (GEF) 5                                                                             |
| 4.2 | 223467_at    |   | RASD1                     | RAS, dexamethasone-induced 1                                                                                               |
| 4.2 | 223484_at    |   | C15orf48                  | chromosome 15 open reading frame 48                                                                                        |
| 4.2 | 226721_at    |   | DPY19L4                   | dpy-19-like 4 (C. elegans)                                                                                                 |
| 4.2 | 221986_s_at  | D | KLHL24                    | kelch-like 24 (Drosophila)                                                                                                 |
| 4.2 | 213823_at    |   | HOXA11                    | homeobox A11                                                                                                               |
| 4.2 | 202661_at    | D | ITPR2                     | inositol 1,4,5-trisphosphate receptor, type 2                                                                              |
| 4.1 | 231067_s_at  | D | AKAP12                    | A kinase (PRKA) anchor protein 12                                                                                          |
| 4.1 | 224839_s_at  |   | GPT2 (includes EG:108682) | glutamic pyruvate transaminase (alanine aminotransferase) 2                                                                |
| 4.1 | 214118_x_at  | D | PCM1                      | pericentriolar material 1                                                                                                  |
| 4.1 | 219551_at    |   | EAF2                      | ELL associated factor 2                                                                                                    |
| 4.1 | 238818_at    | D | KIAA1429                  | KIAA1429                                                                                                                   |
| 4.1 | 215527_at    |   | KHDRBS2                   | KH domain containing, RNA binding, signal transduction associated 2                                                        |
| 4.1 | 216994_s_at  |   | RUNX2                     | runt-related transcription factor 2                                                                                        |
| 4.1 | 222016_s_at  |   | ZNF323                    | zinc finger protein 323                                                                                                    |
| 4.1 | 237968_at    |   | ATL2                      | atlastin GTPase 2                                                                                                          |
| 4.1 | 212473_s_at  | D | MICAL2                    | microtubule associated monooxygenase, calponin and LIM domain containing 2                                                 |
| 4.1 | 224829_at    | D | CPEB4                     | cytoplasmic polyadenylation element binding protein 4                                                                      |
| 4.1 | 205185_at    |   | SPINK5                    | serine peptidase inhibitor, Kazal type 5                                                                                   |
| 4.1 | 227569_at    |   | LNX2                      | ligand of numb-protein X 2                                                                                                 |
| 4.1 | 214854_at    |   | DOT1L                     | DOT1-like, histone H3 methyltransferase (S. cerevisiae)                                                                    |
| 4.1 | 233654_at    |   | PIGG                      | phosphatidylinositol glycan anchor biosynthesis, class G                                                                   |
| 4.1 | 223218_s_at  | D | NFKBIZ                    | nuclear factor of kappa light polypeptide gene enhancer in B-cells inhibitor, zeta                                         |
| 4.1 | 216990_at    |   | GART                      | phosphoribosylglycinamide formyltransferase, phosphoribosylglycinamide synthetase, phosphoribosylaminoimidazole synthetase |
| 4.1 | 227565_at    |   | KLHL5                     | kelch-like 5 (Drosophila)                                                                                                  |
| 4.1 | 221088_s_at  | D | PPP1R9A                   | protein phosphatase 1, regulatory subunit 9A                                                                               |
| 4.1 | 232729_at    |   | FBXO32                    | F-box protein 32                                                                                                           |
| 4.1 | 59437_at     |   | C9orf116                  | chromosome 9 open reading frame 116                                                                                        |
| 4.1 | 211026_s_at  | D | MGLL                      | monoglyceride lipase                                                                                                       |

Hui L, Wick HC, Edlow AG, Cowan JM, Bianchi DJW. Global gene expression analysis of term amniotic fluid cell-free fetal RNA Obstet Gynecol 2013;121.

The authors provided this information as a supplement to their article.

© Copyright 2013 American College of Obstetricians and Gynecologists.

|     |              |   |           |                                                                                               |
|-----|--------------|---|-----------|-----------------------------------------------------------------------------------------------|
| 4.1 | 234195_at    | D | TNFRSF10C | tumor necrosis factor receptor superfamily, member 10c, decoy without an intracellular domain |
| 4.1 | 1570388_a_at |   | LOC440896 | uncharacterized LOC440896                                                                     |
| 4.1 | 224009_x_at  | D | DHRS9     | dehydrogenase/reductase (SDR family) member 9                                                 |
| 4.0 | 211162_x_at  | D | SCD       | stearoyl-CoA desaturase (delta-9-desaturase)                                                  |
| 4.0 | 206747_at    | D | GPRIN2    | G protein regulated inducer of neurite outgrowth 2                                            |
| 4.0 | 1562255_at   |   | SYTL3     | synaptotagmin-like 3                                                                          |
| 4.0 | 230951_at    | D | EPB41L5   | erythrocyte membrane protein band 4.1 like 5                                                  |
| 4.0 | 220192_x_at  | D | SPDEF     | SAM pointed domain containing ets transcription factor                                        |
| 4.0 | 226056_at    |   | ARHGAP31  | Rho GTPase activating protein 31                                                              |
| 4.0 | 1553785_at   |   | RASGEF1B  | RasGEF domain family, member 1B                                                               |
| 4.0 | 206551_x_at  | D | KLHL24    | kelch-like 24 (Drosophila)                                                                    |
| 4.0 | 209913_x_at  |   | AP5Z1     | adaptor-related protein complex 5, zeta 1 subunit                                             |
| 4.0 | 231875_at    | D | KIF21A    | kinesin family member 21A                                                                     |
| 4.0 | 225624_at    |   | SNX29     | sorting nexin 29                                                                              |
| 4.0 | 207709_at    | D | PRKAA2    | protein kinase, AMP-activated, alpha 2 catalytic subunit                                      |
| 4.0 | 203639_s_at  | D | FGFR2     | fibroblast growth factor receptor 2                                                           |
| 4.0 | 243881_at    | D | SHC3      | SHC (Src homology 2 domain containing) transforming protein 3                                 |
| 4.0 | 228697_at    |   | HINT3     | histidine triad nucleotide binding protein 3                                                  |
| 4.0 | 203059_s_at  | D | PAPSS2    | 3'-phosphoadenosine 5'-phosphosulfate synthase 2                                              |
| 4.0 | 206636_at    |   | RASA2     | RAS p21 protein activator 2                                                                   |
| 3.9 | 231077_at    |   | C1orf192  | chromosome 1 open reading frame 192                                                           |
| 3.9 | 238461_at    |   | EIF4E3    | eukaryotic translation initiation factor 4E family member 3                                   |
| 3.9 | 233642_s_at  |   | HEATR5B   | HEAT repeat containing 5B                                                                     |
| 3.9 | 229824_at    | D | SHC3      | SHC (Src homology 2 domain containing) transforming protein 3                                 |
| 3.9 | 1553132_a_at | D | TC2N      | tandem C2 domains, nuclear                                                                    |
| 3.9 | 215867_x_at  | D | CA12      | carbonic anhydrase XII                                                                        |
| 3.9 | 218319_at    |   | PELL1     | pellino E3 ubiquitin protein ligase 1                                                         |
| 3.9 | 225018_at    | D | SPIRE1    | spire homolog 1 (Drosophila)                                                                  |
| 3.9 | 216075_at    | D | ST3GAL5   | ST3 beta-galactoside alpha-2,3-sialyltransferase 5                                            |
| 3.9 | 233719_s_at  | D | TASP1     | taspase, threonine aspartase, 1                                                               |
| 3.9 | 210951_x_at  | D | RAB27A    | RAB27A, member RAS oncogene family family with sequence similarity 174, member B              |
| 3.9 | 222085_at    | D | FAM174B   | neuralized homolog 3 (Drosophila) pseudogene                                                  |
| 3.9 | 232593_at    |   | NEURL3    | neuralized homolog 3 (Drosophila) pseudogene                                                  |
| 3.9 | 243198_at    | D | TEX9      | testis expressed 9                                                                            |
| 3.9 | 206023_at    |   | NMU       | neuromedin U                                                                                  |
| 3.9 | 229115_at    |   | DYNC1H1   | dynein, cytoplasmic 1, heavy chain 1                                                          |
| 3.9 | 206109_at    |   | FUT1      | fucosyltransferase 1 (galactoside 2-alpha-L-fucosyltransferase, H blood group)                |
| 3.9 | 1556042_s_at |   | LOC338799 | uncharacterized LOC338799                                                                     |
| 3.9 | 220965_s_at  |   | RSPH6A    | radial spoke head 6 homolog A (Chlamydomonas)                                                 |
| 3.9 | 232361_s_at  | D | EHF       | ets homologous factor                                                                         |

Hui L, Wick HC, Edlow AG, Cowan JM, Bianchi DJW. Global gene expression analysis of term amniotic fluid cell-free fetal RNA *Obstet Gynecol* 2013;121.

The authors provided this information as a supplement to their article.

© Copyright 2013 American College of Obstetricians and Gynecologists.

|     |              |   |                          |                                                                                       |
|-----|--------------|---|--------------------------|---------------------------------------------------------------------------------------|
| 3.9 | 1554762_a_at | D | WWC2                     | WW and C2 domain containing 2                                                         |
| 3.9 | 204646_at    |   | DPYD                     | dihydropyrimidine dehydrogenase                                                       |
| 3.8 | 204073_s_at  | D | C11orf9                  | chromosome 11 open reading frame 9                                                    |
| 3.8 | 226629_at    |   | SLC43A2                  | solute carrier family 43, member 2                                                    |
| 3.8 | 204198_s_at  |   | RUNX3                    | runt-related transcription factor 3                                                   |
| 3.8 | 206043_s_at  |   | ATP2C2                   | ATPase, Ca++ transporting, type 2C, member 2                                          |
| 3.8 | 234934_at    |   | RALGAPA2                 | Ral GTPase activating protein, alpha subunit 2 (catalytic)                            |
| 3.8 | 207294_at    |   | AGTR2                    | angiotensin II receptor, type 2                                                       |
| 3.8 | 223567_at    |   | SEMA6B                   | sema domain, transmembrane domain (TM), and cytoplasmic domain, (semaphorin) 6B       |
| 3.8 | 226313_at    |   | C10orf35                 | chromosome 10 open reading frame 35                                                   |
| 3.8 | 207924_x_at  | D | PAX8 (includes EG:18510) | paired box 8                                                                          |
| 3.8 | 224329_s_at  |   | CNFN                     | cornifelin                                                                            |
| 3.8 | 222772_at    | D | MYEF2                    | myelin expression factor 2                                                            |
| 3.8 | 227067_x_at  |   | NOTCH2NL                 | notch 2 N-terminal like                                                               |
| 3.8 | 227782_at    |   | ZBTB7C                   | zinc finger and BTB domain containing 7C                                              |
| 3.7 | 238420_at    |   | TAOK1                    | TAO kinase 1                                                                          |
| 3.7 | 1567519_at   |   | PLXNA3                   | plexin A3                                                                             |
| 3.7 | 210597_x_at  |   | PRB1/PRB2                | proline-rich protein BstNI subfamily 2                                                |
| 3.7 | 1553949_at   |   | IQSEC3                   | IQ motif and Sec7 domain 3                                                            |
| 3.7 | 216051_x_at  |   | PRINS                    | psoriasis associated RNA induced by stress (non-protein coding)                       |
| 3.7 | 201243_s_at  |   | ATP1B1                   | ATPase, Na+/K+ transporting, beta 1 polypeptide                                       |
| 3.7 | 237329_at    |   | LOC100509621             | uncharacterized LOC100509621                                                          |
| 3.7 | 212188_at    | D | KCTD12                   | potassium channel tetramerisation domain containing 12                                |
| 3.7 | 1553492_a_at |   | PAX1                     | paired box 1                                                                          |
| 3.7 | 242982_x_at  |   | ITGB8                    | integrin, beta 8                                                                      |
| 3.7 | 223952_x_at  | D | DHRS9                    | dehydrogenase/reductase (SDR family) member 9                                         |
| 3.7 | 211882_x_at  | D | FUT6                     | fucosyltransferase 6 (alpha (1,3) fucosyltransferase)                                 |
| 3.7 | 235044_at    |   | CYYR1                    | cysteine/tyrosine-rich 1                                                              |
| 3.7 | 221416_at    |   | PLA2G2F                  | phospholipase A2, group IIF                                                           |
| 3.7 | 205356_at    |   | USP13                    | ubiquitin specific peptidase 13 (isopeptidase T-3)                                    |
| 3.7 | 211994_at    | D | WNK1                     | WNK lysine deficient protein kinase 1                                                 |
| 3.7 | 226907_at    |   | PPP1R14C                 | protein phosphatase 1, regulatory (inhibitor) subunit 14C                             |
| 3.7 | 212217_at    |   | PREPL                    | prolyl endopeptidase-like                                                             |
| 3.7 | 235766_x_at  | D | RAB27A                   | RAB27A, member RAS oncogene family                                                    |
| 3.7 | 201974_s_at  |   | CCZ1/CCZ1B               | CCZ1 vacuolar protein trafficking and biogenesis associated homolog B (S. cerevisiae) |
| 3.7 | 208650_s_at  | D | CD24                     | CD24 molecule                                                                         |
| 3.7 | 225108_at    |   | AGPS                     | alkylglycerone phosphate synthase                                                     |
| 3.7 | 221230_s_at  |   | ARID4B                   | AT rich interactive domain 4B (RBP1-like)                                             |
| 3.7 | 238021_s_at  |   | CRNDE                    | colorectal neoplasia differentially expressed (non-protein coding)                    |
| 3.7 | 241955_at    | D | HECTD1                   | HECT domain containing E3 ubiquitin protein ligase 1                                  |
| 3.7 | 222268_x_at  | D | MUC5AC/MUC5B             | mucin 5AC, oligomeric mucus/gel-forming                                               |

Hui L, Wick HC, Edlow AG, Cowan JM, Bianchi DJW. Global gene expression analysis of term amniotic fluid cell-free fetal RNA *Obstet Gynecol* 2013;121.

The authors provided this information as a supplement to their article.

© Copyright 2013 American College of Obstetricians and Gynecologists.

|     |              |   |                          |                                                                                         |
|-----|--------------|---|--------------------------|-----------------------------------------------------------------------------------------|
| 3.7 | 201341_at    | D | ENC1                     | ectodermal-neural cortex 1 (with BTB-like domain)                                       |
| 3.7 | 225750_at    | D | ERO1L                    | ERO1-like ( <i>S. cerevisiae</i> )                                                      |
| 3.7 | 223862_at    |   | GHRL                     | ghrelin/obestatin prepropeptide                                                         |
| 3.7 | 221204_s_at  |   | CRTAC1                   | cartilage acidic protein 1                                                              |
| 3.7 | 235299_at    | D | SLC41A2                  | solute carrier family 41, member 2                                                      |
| 3.7 | 223028_s_at  | D | SNX9                     | sorting nexin 9                                                                         |
| 3.6 | 213659_at    |   | ZNF75D                   | zinc finger protein 75D                                                                 |
| 3.6 | 210513_s_at  | D | VEGFA                    | vascular endothelial growth factor A                                                    |
| 3.6 | 212508_at    |   | MOAP1                    | modulator of apoptosis 1                                                                |
| 3.6 | 242271_at    |   | SLC26A9                  | solute carrier family 26, member 9                                                      |
| 3.6 | 1566901_at   |   | TGIF1                    | TGFB-induced factor homeobox 1                                                          |
| 3.6 | 244076_at    |   | KIAA2022                 | KIAA2022                                                                                |
| 3.6 | 221687_s_at  |   | FAM125B                  | family with sequence similarity 125, member B                                           |
| 3.6 | 209534_x_at  | D | AKAP13                   | A kinase (PRKA) anchor protein 13                                                       |
| 3.6 | 223383_at    | D | ZNRF1                    | zinc and ring finger 1, E3 ubiquitin protein ligase                                     |
| 3.6 | 224831_at    | D | CPEB4                    | cytoplasmic polyadenylation element binding protein 4                                   |
| 3.6 | 229311_at    |   | GKAP1                    | G kinase anchoring protein 1                                                            |
| 3.6 | 230093_at    |   | RSPH1                    | radial spoke head 1 homolog ( <i>Chlamydomonas</i> )                                    |
| 3.6 | 209114_at    |   | TSPAN1                   | tetraspanin 1                                                                           |
| 3.6 | 212186_at    | D | ACACA                    | acetyl-CoA carboxylase alpha                                                            |
| 3.6 | 1554841_at   |   | MTHFD2L                  | methylenetetrahydrofolate dehydrogenase (NADP+ dependent) 2-like                        |
| 3.6 | 206419_at    | D | RORC                     | RAR-related orphan receptor C                                                           |
| 3.6 | 215842_s_at  | D | ATP11A                   | ATPase, class VI, type 11A                                                              |
| 3.6 | 206998_x_at  |   | PRB3                     | proline-rich protein BstNI subfamily 3                                                  |
| 3.6 | 224967_at    | D | UGCG                     | UDP-glucose ceramide glucosyltransferase                                                |
| 3.6 | 225102_at    | D | MGLL                     | monoglyceride lipase                                                                    |
| 3.6 | 202459_s_at  |   | LPIN2                    | lipin 2                                                                                 |
| 3.6 | 225452_at    |   | MED1 (includes EG:19014) | mediator complex subunit 1                                                              |
| 3.6 | 224828_at    | D | CPEB4                    | cytoplasmic polyadenylation element binding protein 4                                   |
| 3.6 | 228400_at    | D | SHROOM3                  | shroom family member 3                                                                  |
| 3.6 | 235210_s_at  |   | C8orf84                  | chromosome 8 open reading frame 84                                                      |
| 3.6 | 203126_at    |   | IMPA2                    | inositol(myo)-1(or 4)-monophosphatase 2                                                 |
| 3.6 | 203796_s_at  |   | BCL7A                    | B-cell CLL/lymphoma 7A                                                                  |
| 3.5 | 226811_at    |   | FAM46C                   | family with sequence similarity 46, member C                                            |
| 3.5 | 227343_at    |   | MYEOV                    | myeloma overexpressed (in a subset of t(11;14) positive multiple myelomas)              |
| 3.5 | 243927_x_at  | D | KIAA1429                 | KIAA1429                                                                                |
| 3.5 | 204881_s_at  | D | UGCG                     | UDP-glucose ceramide glucosyltransferase                                                |
| 3.5 | 1557100_s_at | D | HECTD1                   | HECT domain containing E3 ubiquitin protein ligase 1                                    |
| 3.5 | 210686_x_at  | D | SLC25A16                 | solute carrier family 25 (mitochondrial carrier; Graves disease autoantigen), member 16 |
| 3.5 | 1554634_at   |   | PDS5B                    | PDS5, regulator of cohesion maintenance, homolog B ( <i>S. cerevisiae</i> )             |
| 3.5 | 212171_x_at  | D | VEGFA                    | vascular endothelial growth factor A                                                    |
| 3.5 | 1557994_at   | D | TTN (includes EG:22138)  | titin                                                                                   |

Hui L, Wick HC, Edlow AG, Cowan JM, Bianchi DJW. Global gene expression analysis of term amniotic fluid cell-free fetal RNA *Obstet Gynecol* 2013;121.

The authors provided this information as a supplement to their article.

© Copyright 2013 American College of Obstetricians and Gynecologists.

|     |             |   |                            |                                                                                                   |
|-----|-------------|---|----------------------------|---------------------------------------------------------------------------------------------------|
| 3.5 | 212262_at   | D | QKI                        | QKI, KH domain containing, RNA binding                                                            |
| 3.5 | 218035_s_at | D | RBM47                      | RNA binding motif protein 47                                                                      |
| 3.5 | 204099_at   |   | SMARCD3                    | SWI/SNF related, matrix associated, actin dependent regulator of chromatin, subfamily d, member 3 |
| 3.5 | 200670_at   |   | XBP1 (includes EG: 140614) | X-box binding protein 1                                                                           |
| 3.5 | 204249_s_at |   | LMO2                       | LIM domain only 2 (rhombotin-like 1)                                                              |
| 3.5 | 229400_at   |   | HOXD10                     | homeobox D10                                                                                      |
| 3.5 | 218306_s_at |   | HERC1                      | HECT and RLD domain containing E3 ubiquitin protein ligase family member 1                        |
| 3.5 | 207923_x_at | D | PAX8 (includes EG: 18510)  | paired box 8                                                                                      |
| 3.5 | 203301_s_at |   | DMTF1                      | cyclin D binding myb-like transcription factor 1                                                  |
| 3.5 | 210741_at   | D | ARHGEF12                   | Rho guanine nucleotide exchange factor (GEF) 12                                                   |
| 3.5 | 244669_at   |   | SNHG5                      | small nucleolar RNA host gene 5 (non-protein coding)                                              |
| 3.5 | 1556684_at  |   | RPPH1                      | ribonuclease P RNA component H1                                                                   |
| 3.5 | 208772_at   | D | ANKHD1                     | ankyrin repeat and KH domain containing 1                                                         |
| 3.5 | 221477_s_at | D | SOD2                       | superoxide dismutase 2, mitochondrial                                                             |
| 3.5 | 213693_s_at | D | MUC1                       | mucin 1, cell surface associated                                                                  |
| 3.5 | 226270_at   |   | EXOC2                      | exocyst complex component 2                                                                       |
| 3.5 | 219916_s_at |   | RNF39                      | ring finger protein 39                                                                            |
| 3.5 | 230788_at   |   | GCNT2                      | glucosaminyl (N-acetyl) transferase 2, I-branching enzyme (I blood group)                         |
| 3.5 | 225465_at   | D | MAG11 (includes EG: 14924) | membrane associated guanylate kinase, WW and PDZ domain containing 1                              |
| 3.5 | 223827_at   |   | TNFRSF19                   | tumor necrosis factor receptor superfamily, member 19                                             |
| 3.5 | 224481_s_at | D | HECTD1                     | HECT domain containing E3 ubiquitin protein ligase 1                                              |
| 3.4 | 213085_s_at | D | WWC1                       | WW and C2 domain containing 1                                                                     |
| 3.4 | 212468_at   | D | SPAG9                      | sperm associated antigen 9                                                                        |
| 3.4 | 204680_s_at | D | RAPGEF5                    | Rap guanine nucleotide exchange factor (GEF) 5                                                    |
| 3.4 | 207854_at   |   | GYPE                       | glycophorin E (MNS blood group)                                                                   |
| 3.4 | 224975_at   | D | NFIA                       | nuclear factor I/A                                                                                |
| 3.4 | 201952_at   | D | ALCAM                      | activated leukocyte cell adhesion molecule                                                        |
| 3.4 | 219155_at   | D | PITPNC1                    | phosphatidylinositol transfer protein, cytoplasmic 1                                              |
| 3.4 | 236031_x_at |   | FREM1                      | FRAS1 related extracellular matrix 1                                                              |
| 3.4 | 233508_at   |   | MAP3K13                    | mitogen-activated protein kinase kinase kinase 13                                                 |
| 3.4 | 203058_s_at | D | PAPSS2                     | 3'-phosphoadenosine 5'-phosphosulfate synthase 2                                                  |
| 3.4 | 236935_at   |   | PTPN4                      | protein tyrosine phosphatase, non-receptor type 4 (megakaryocyte)                                 |
| 3.4 | 212616_at   | D | CHD9                       | chromodomain helicase DNA binding protein 9                                                       |
| 3.4 | 211992_at   | D | WNK1                       | WNK lysine deficient protein kinase 1                                                             |
| 3.4 | 227983_at   |   | RILPL2                     | Rab interacting lysosomal protein-like 2                                                          |
| 3.4 | 207799_x_at |   | ARMCX4                     | armadillo repeat containing, X-linked 4                                                           |
| 3.4 | 226375_at   |   | LMTK2                      | lemur tyrosine kinase 2                                                                           |
| 3.4 | 229180_at   | D | WWC1                       | WW and C2 domain containing 1                                                                     |

Hui L, Wick HC, Edlow AG, Cowan JM, Bianchi DJW. Global gene expression analysis of term amniotic fluid cell-free fetal RNA *Obstet Gynecol* 2013;121.

The authors provided this information as a supplement to their article.

© Copyright 2013 American College of Obstetricians and Gynecologists.

|     |             |   |                            |                                                               |
|-----|-------------|---|----------------------------|---------------------------------------------------------------|
| 3.4 | 223530_at   |   | TDRKH                      | tudor and KH domain containing                                |
| 3.3 | 225671_at   |   | SPNS2                      | spinster homolog 2 (Drosophila)                               |
| 3.3 | 208953_at   | D | LARP4B                     | La ribonucleoprotein domain family, member 4B                 |
| 3.3 | 242647_at   | D | USP34                      | ubiquitin specific peptidase 34                               |
| 3.3 | 203502_at   |   | BPGM                       | 2,3-bisphosphoglycerate mutase                                |
| 3.3 | 212192_at   | D | KCTD12                     | potassium channel tetramerisation domain containing 12        |
| 3.3 | 208664_s_at | D | TTC3                       | tetratricopeptide repeat domain 3                             |
| 3.3 | 244759_x_at |   | RNF207                     | ring finger protein 207                                       |
| 3.3 | 221880_s_at | D | FAM174B                    | family with sequence similarity 174, member B                 |
| 3.3 | 238450_at   | D | PFKFB2                     | 6-phosphofructo-2-kinase/fructose-2,6-biphosphatase 2         |
| 3.3 | 227742_at   |   | CLIC6                      | chloride intracellular channel 6                              |
| 3.3 | 204777_s_at |   | MAL                        | mal, T-cell differentiation protein                           |
| 3.3 | 211966_at   |   | COL4A2 (includes EG:12827) | collagen, type IV, alpha 2                                    |
| 3.3 | 228846_at   | D | MXD1                       | MAX dimerization protein 1                                    |
| 3.3 | 220335_x_at |   | CES3                       | carboxylesterase 3                                            |
| 3.3 | 209488_s_at |   | RBPM5                      | RNA binding protein with multiple splicing                    |
| 3.3 | 214164_x_at | D | CA12                       | carbonic anhydrase XII                                        |
| 3.3 | 216946_at   |   | HLA-DOA                    | major histocompatibility complex, class II, DO alpha          |
| 3.3 | 203955_at   |   | PPP1R26                    | protein phosphatase 1, regulatory subunit 26                  |
| 3.3 | 215785_s_at | D | CYFIP2                     | cytoplasmic FMR1 interacting protein 2                        |
| 3.3 | 212324_s_at | D | VPS13D                     | vacuolar protein sorting 13 homolog D (S. cerevisiae)         |
| 3.3 | 221985_at   | D | KLHL24                     | kelch-like 24 (Drosophila)                                    |
| 3.3 | 208797_s_at | D | GOLGA8A/GOLGA8B            | golgin A8 family, member A                                    |
| 3.3 | 211806_s_at |   | KCNJ15                     | potassium inwardly-rectifying channel, subfamily J, member 15 |
| 3.3 | 213060_s_at |   | CHI3L2                     | chitinase 3-like 2                                            |
| 3.3 | 223871_x_at |   | ING5                       | inhibitor of growth family, member 5                          |
| 3.3 | 203225_s_at |   | RFK                        | riboflavin kinase                                             |
| 3.3 | 201963_at   |   | ACSL1                      | acyl-CoA synthetase long-chain family member 1                |
| 3.3 | 214227_at   |   | GNG7                       | guanine nucleotide binding protein (G protein), gamma 7       |
| 3.2 | 226806_s_at | D | NFIA                       | nuclear factor I/A                                            |
| 3.2 | 207602_at   |   | TMPRSS11D                  | transmembrane protease, serine 11D                            |
| 3.2 | 205248_at   |   | DOPEY2                     | dopey family member 2                                         |
| 3.2 | 212094_at   | D | PEG10                      | paternally expressed 10                                       |
| 3.2 | 225986_x_at |   | CPSF2                      | cleavage and polyadenylation specific factor 2, 100kDa        |
| 3.2 | 212927_at   |   | SMC5                       | structural maintenance of chromosomes 5                       |
| 3.2 | 212326_at   | D | VPS13D                     | vacuolar protein sorting 13 homolog D (S. cerevisiae)         |
| 3.2 | 201393_s_at |   | IGF2R                      | insulin-like growth factor 2 receptor                         |
| 3.2 | 213957_s_at | D | CEP350                     | centrosomal protein 350kDa                                    |
| 3.2 | 215101_s_at |   | CXCL5                      | chemokine (C-X-C motif) ligand 5                              |
| 3.2 | 234394_at   |   | ZNF124                     | zinc finger protein 124                                       |
| 3.2 | 201951_at   | D | ALCAM                      | activated leukocyte cell adhesion molecule                    |

Hui L, Wick HC, Edlow AG, Cowan JM, Bianchi DJW. Global gene expression analysis of term amniotic fluid cell-free fetal RNA *Obstet Gynecol* 2013;121.

The authors provided this information as a supplement to their article.

© Copyright 2013 American College of Obstetricians and Gynecologists.

|     |             |   |              |                                                                                |
|-----|-------------|---|--------------|--------------------------------------------------------------------------------|
| 3.2 | 213174_at   |   | TTC9         | tetratricopeptide repeat domain 9                                              |
| 3.2 | 218454_at   |   | PLBD1        | phospholipase B domain containing 1                                            |
| 3.2 | 213685_at   |   | LOC100506963 | uncharacterized LOC100506963                                                   |
| 3.2 | 202796_at   |   | SYNPO        | synaptopodin                                                                   |
| 3.2 | 205042_at   |   | GNE          | glucosamine (UDP-N-acetyl)-2-epimerase/N-acetylmannosamine kinase              |
| 3.2 | 212092_at   | D | PEG10        | paternally expressed 10                                                        |
| 3.2 | 218598_at   |   | RINT1        | RAD50 interactor 1                                                             |
| 3.2 | 219771_at   |   | TBC1D8B      | TBC1 domain family, member 8B (with GRAM domain)                               |
| 3.2 | 206556_at   |   | CLUL1        | clusterin-like 1 (retinal)                                                     |
| 3.2 | 212276_at   | D | LPIN1        | lipin 1                                                                        |
| 3.2 | 206318_at   | D | SPINLW1      | serine peptidase inhibitor-like, with Kunitz and WAP domains 1 (eppin)         |
| 3.2 | 209890_at   |   | TSPAN5       | tetraspanin 5                                                                  |
| 3.2 | 243653_at   | D | SHROOM3      | shroom family member 3                                                         |
| 3.2 | 213017_at   |   | ABHD3        | abhydrolase domain containing 3                                                |
| 3.2 | 238701_x_at | D | C11orf92     | chromosome 11 open reading frame 92                                            |
| 3.2 | 232059_at   |   | DSCAML1      | Down syndrome cell adhesion molecule like 1                                    |
| 3.2 | 207754_at   |   | RASSF8       | Ras association (RalGDS/AF-6) domain family (N-terminal) member 8              |
| 3.1 | 226302_at   |   | ATP8B1       | ATPase, aminophospholipid transporter, class I, type 8B, member 1              |
| 3.1 | 1553185_at  | D | RASEF        | RAS and EF-hand domain containing La ribonucleoprotein domain family, member 4 |
| 3.1 | 238959_at   |   | LARP4        |                                                                                |
| 3.1 | 1562392_at  |   | MRPL23       | mitochondrial ribosomal protein L23                                            |
| 3.1 | 222738_at   | D | WWC2         | WW and C2 domain containing 2                                                  |
| 3.1 | 204440_at   |   | CD83         | CD83 molecule                                                                  |
| 3.1 | 1553447_at  |   | AGBL1        | ATP/GTP binding protein-like 1                                                 |
| 3.1 | 214091_s_at | D | GPX3         | glutathione peroxidase 3 (plasma)                                              |
| 3.1 | 211993_at   | D | WNK1         | WNK lysine deficient protein kinase 1                                          |
| 3.1 | 201976_s_at |   | MYO10        | myosin X                                                                       |
| 3.1 | 225820_at   | D | PHF17        | PHD finger protein 17                                                          |
| 3.1 | 208883_at   | D | UBR5         | ubiquitin protein ligase E3 component n-recognin 5                             |
| 3.1 | 202411_at   |   | IFI27        | interferon, alpha-inducible protein 27                                         |
| 3.1 | 202786_at   |   | STK39        | serine threonine kinase 39                                                     |
| 3.1 | 208884_s_at | D | UBR5         | ubiquitin protein ligase E3 component n-recognin 5                             |
| 3.1 | 223279_s_at | D | UACA         | uveal autoantigen with coiled-coil domains and ankyrin repeats                 |
| 3.1 | 1569940_at  |   | SLC6A16      | solute carrier family 6, member 16                                             |
| 3.1 | 232349_x_at | D | DCAF6        | DDB1 and CUL4 associated factor 6                                              |
| 3.1 | 212665_at   |   | TIPARP       | TCDD-inducible poly(ADP-ribose) polymerase                                     |
| 3.1 | 206229_x_at |   | PAX2         | paired box 2                                                                   |
| 3.1 | 210262_at   |   | CRISP2       | cysteine-rich secretory protein 2                                              |
| 3.1 | 213328_at   |   | NEK1         | NIMA (never in mitosis gene a)-related kinase 1                                |
| 3.1 | 223190_s_at | D | MLL5         | myeloid/lymphoid or mixed-lineage leukemia 5 (trithorax homolog, Drosophila)   |
| 3.1 | 212150_at   |   | EFR3A        | EFR3 homolog A (S. cerevisiae)                                                 |

Hui L, Wick HC, Edlow AG, Cowan JM, Bianchi DJW. Global gene expression analysis of term amniotic fluid cell-free fetal RNA *Obstet Gynecol* 2013;121.

The authors provided this information as a supplement to their article.

© Copyright 2013 American College of Obstetricians and Gynecologists.

|     |              |   |                          |                                                                                                   |
|-----|--------------|---|--------------------------|---------------------------------------------------------------------------------------------------|
| 3.1 | 224685_at    | D | MLLT4                    | myeloid/lymphoid or mixed-lineage leukemia (trithorax homolog, Drosophila); translocated to, 4    |
| 3.1 | 206877_at    | D | MXD1                     | MAX dimerization protein 1                                                                        |
| 3.1 | 226596_x_at  |   | LOC729852                | uncharacterized LOC729852                                                                         |
| 3.1 | 212774_at    |   | ZNF238                   | zinc finger protein 238                                                                           |
| 3.1 | 212543_at    |   | AIM1 (includes EG:11630) | absent in melanoma 1                                                                              |
| 3.1 | 222935_x_at  | D | SLC39A8                  | solute carrier family 39 (zinc transporter), member 8                                             |
| 3.1 | 202295_s_at  |   | CTSH                     | cathepsin H                                                                                       |
| 3.1 | 212514_x_at  | D | DDX3X                    | DEAD (Asp-Glu-Ala-Asp) box polypeptide 3, X-linked                                                |
| 3.1 | 214192_at    |   | NUP88                    | nucleoporin 88kDa                                                                                 |
| 3.1 | 241368_at    |   | PLIN5                    | perilipin 5                                                                                       |
| 3.1 | 229292_at    | D | EPB41L5                  | erythrocyte membrane protein band 4.1 like 5                                                      |
| 3.1 | 222730_s_at  |   | ZDHHC2                   | zinc finger, DHHC-type containing 2                                                               |
| 3.1 | 202303_x_at  | D | SMARCA5                  | SWI/SNF related, matrix associated, actin dependent regulator of chromatin, subfamily a, member 5 |
| 3.1 | 211527_x_at  | D | VEGFA                    | vascular endothelial growth factor A                                                              |
| 3.1 | 219392_x_at  | D | PRR11                    | proline rich 11                                                                                   |
| 3.1 | 235485_at    |   | WDR44                    | WD repeat domain 44                                                                               |
| 3.1 | 203911_at    |   | RAP1GAP                  | RAP1 GTPase activating protein                                                                    |
| 3.1 | 203408_s_at  |   | SATB1                    | SATB homeobox 1                                                                                   |
| 3.0 | 210251_s_at  |   | RUFY3                    | RUN and FYVE domain containing 3                                                                  |
| 3.0 | 220319_s_at  | D | MYLIP                    | myosin regulatory light chain interacting protein                                                 |
| 3.0 | 216153_x_at  |   | RECK                     | reversion-inducing-cysteine-rich protein with kazal motifs                                        |
| 3.0 | 233432_at    |   | TTL (includes EG:646982) | twelve-thirteen translocation leukemia                                                            |
| 3.0 | 208882_s_at  | D | UBR5                     | ubiquitin protein ligase E3 component n-recognin 5                                                |
| 3.0 | 229586_at    | D | CHD9                     | chromodomain helicase DNA binding protein 9                                                       |
| 3.0 | 222135_at    |   | ZNF587B/ZNF814           | zinc finger protein 587B                                                                          |
| 3.0 | 226651_at    |   | HOMER1                   | homer homolog 1 (Drosophila)                                                                      |
| 3.0 | 224933_s_at  | D | JMJD1C                   | jumonji domain containing 1C                                                                      |
| 3.0 | 233594_at    |   | LOC100506025             | uncharacterized LOC100506025                                                                      |
| 3.0 | 201631_s_at  |   | IER3                     | immediate early response 3                                                                        |
| 3.0 | 223681_s_at  |   | INADL                    | InaD-like (Drosophila)                                                                            |
| 3.0 | 223217_s_at  | D | NFKBIZ                   | nuclear factor of kappa light polypeptide gene enhancer in B-cells inhibitor, zeta                |
| 3.0 | 202637_s_at  |   | ICAM1                    | intercellular adhesion molecule 1                                                                 |
| 3.0 | 1569594_a_at | D | NEMF                     | nuclear export mediator factor                                                                    |
| 3.0 | 213251_at    | D | SMARCA5                  | SWI/SNF related, matrix associated, actin dependent regulator of chromatin, subfamily a, member 5 |
| 3.0 | 201325_s_at  | D | EMP1                     | epithelial membrane protein 1                                                                     |
| 3.0 | 211597_s_at  |   | HOPX                     | HOP homeobox                                                                                      |
| 3.0 | 225188_at    |   | RAPH1                    | Ras association (RalGDS/AF-6) and pleckstrin homology domains 1                                   |
| 3.0 | 236745_at    |   | CCDC78                   | coiled-coil domain containing 78                                                                  |

Hui L, Wick HC, Edlow AG, Cowan JM, Bianchi DJW. Global gene expression analysis of term amniotic fluid cell-free fetal RNA Obstet Gynecol 2013;121.

The authors provided this information as a supplement to their article.

© Copyright 2013 American College of Obstetricians and Gynecologists.



|     |              |   |                            |                                                                                                   |
|-----|--------------|---|----------------------------|---------------------------------------------------------------------------------------------------|
| 3.0 | 209743_s_at  | D | ITCH                       | itchy E3 ubiquitin protein ligase                                                                 |
| 3.0 | 211050_x_at  |   | LOC100288069               | general transcription factor III pseudogene                                                       |
| 3.0 | 1553613_s_at |   | FOXC1                      | forkhead box C1                                                                                   |
| 3.0 | 201663_s_at  | D | SMC4                       | structural maintenance of chromosomes 4                                                           |
| 3.0 | 202040_s_at  |   | KDM5A                      | lysine (K)-specific demethylase 5A                                                                |
| 3.0 | 204667_at    |   | FOXA1                      | forkhead box A1                                                                                   |
| 3.0 | 201383_s_at  | D | NBR1                       | neighbor of BRCA1 gene 1                                                                          |
| 3.0 | 208859_s_at  |   | ATRX                       | alpha thalassemia/mental retardation syndrome X-linked                                            |
| 3.0 | 1561728_a_at |   | LOC400238                  | uncharacterized LOC400238                                                                         |
| 3.0 | 201929_s_at  | D | PKP4                       | plakophilin 4                                                                                     |
| 3.0 | 200604_s_at  |   | PRKAR1A                    | protein kinase, cAMP-dependent, regulatory, type I, alpha (tissue specific extinguisher 1)        |
| 3.0 | 213859_x_at  | D | SMARCA5                    | SWI/SNF related, matrix associated, actin dependent regulator of chromatin, subfamily a, member 5 |
| 3.0 | 228867_at    |   | TATDN3                     | TatD DNase domain containing 3                                                                    |
| 3.0 | 202820_at    |   | AHR                        | aryl hydrocarbon receptor                                                                         |
| 3.0 | 229976_at    |   | MORN5                      | MORN repeat containing 5                                                                          |
| 3.0 | 224960_at    |   | SCYL2                      | SCY1-like 2 ( <i>S. cerevisiae</i> )                                                              |
| 3.0 | 209366_x_at  | D | CYB5A (includes EG:109672) | cytochrome b5 type A (microsomal)                                                                 |
| 3.0 | 214693_x_at  | D | NBPF11 (includes others)   | neuroblastoma breakpoint family, member 11                                                        |
| 3.0 | 217781_s_at  |   | ZFP106                     | zinc finger protein 106 homolog (mouse)                                                           |
| 3.0 | 212467_at    |   | DNAJC13                    | DnaJ (Hsp40) homolog, subfamily C, member 13                                                      |
| 2.9 | 202187_s_at  |   | PPP2R5A                    | protein phosphatase 2, regulatory subunit B', alpha                                               |
| 2.9 | 229414_at    | D | PITPNC1                    | phosphatidylinositol transfer protein, cytoplasmic 1                                              |
| 2.9 | 1554339_a_at |   | COG3 (includes EG:33562)   | component of oligomeric golgi complex 3                                                           |
| 2.9 | 200898_s_at  | D | MGEA5                      | meningioma expressed antigen 5 (hyaluronidase)                                                    |
| 2.9 | 202761_s_at  | D | SYNE2                      | spectrin repeat containing, nuclear envelope 2                                                    |
| 2.9 | 242722_at    |   | LMO7                       | LIM domain 7                                                                                      |
| 2.9 | 242774_at    | D | SYNE2                      | spectrin repeat containing, nuclear envelope 2                                                    |
| 2.9 | 208662_s_at  | D | TTC3                       | tetratricopeptide repeat domain 3                                                                 |
| 2.9 | 218127_at    | D | NFYB                       | nuclear transcription factor Y, beta                                                              |
| 2.9 | 215665_at    |   | HSD3B1                     | hydroxy-delta-5-steroid dehydrogenase, 3 beta- and steroid delta-isomerase 1                      |
| 2.9 | 1566455_at   |   | LOC100507494               | uncharacterized LOC100507494                                                                      |
| 2.9 | 1562391_at   |   | B3GALNT2                   | beta-1,3-N-acetylgalactosaminyltransferase 2                                                      |
| 2.9 | 204058_at    |   | ME1                        | malic enzyme 1, NADP(+)-dependent, cytosolic                                                      |
| 2.9 | 231018_at    |   | PALM3                      | paralemmin 3                                                                                      |
| 2.9 | 241359_at    |   | TLCD2                      | TLC domain containing 2                                                                           |
| 2.9 | 236254_at    | D | VPS13B                     | vacuolar protein sorting 13 homolog B (yeast)                                                     |
| 2.9 | 223940_x_at  | D | MALAT1                     | metastasis associated lung adenocarcinoma transcript 1 (non-protein coding)                       |

Hui L, Wick HC, Edlow AG, Cowan JM, Bianchi DJW. Global gene expression analysis of term amniotic fluid cell-free fetal RNA *Obstet Gynecol* 2013;121.

The authors provided this information as a supplement to their article.

© Copyright 2013 American College of Obstetricians and Gynecologists.

|     |              |   |                            |                                                                                                |
|-----|--------------|---|----------------------------|------------------------------------------------------------------------------------------------|
| 2.9 | 235549_at    |   | RNF144B                    | ring finger protein 144B                                                                       |
| 2.9 | 222649_at    |   | XPO4                       | exportin 4                                                                                     |
| 2.9 | 224240_s_at  |   | CCL28                      | chemokine (C-C motif) ligand 28                                                                |
| 2.9 | 202096_s_at  |   | TSPO                       | translocator protein (18kDa)                                                                   |
| 2.9 | 1558747_at   |   | SMCHD1                     | structural maintenance of chromosomes flexible hinge domain containing 1                       |
| 2.9 | 205062_x_at  |   | ARID4A                     | AT rich interactive domain 4A (RBP1-like)                                                      |
| 2.9 | 230911_at    | D | SIX1                       | SIX homeobox 1                                                                                 |
| 2.9 | 201713_s_at  | D | RANBP2                     | RAN binding protein 2                                                                          |
| 2.9 | 229940_at    |   | SETD3                      | SET domain containing 3                                                                        |
| 2.9 | 219055_at    |   | SRBD1                      | S1 RNA binding domain 1                                                                        |
| 2.9 | 202545_at    |   | PRKCD                      | protein kinase C, delta                                                                        |
| 2.9 | 216245_at    | D | IL1RN                      | interleukin 1 receptor antagonist                                                              |
| 2.9 | 226395_at    |   | HOOK3                      | hook homolog 3 (Drosophila)                                                                    |
| 2.9 | 204917_s_at  |   | MLL3                       | myeloid/lymphoid or mixed-lineage leukemia (trithorax homolog, Drosophila); translocated to, 3 |
| 2.9 | 224970_at    | D | NFIA                       | nuclear factor I/A                                                                             |
| 2.9 | 205432_at    |   | OVGP1                      | oviductal glycoprotein 1, 120kDa                                                               |
| 2.9 | 823_at       |   | CX3CL1                     | chemokine (C-X3-C motif) ligand 1                                                              |
| 2.9 | 206748_s_at  | D | SPAG9                      | sperm associated antigen 9                                                                     |
| 2.9 | 219976_at    |   | HOOK1                      | hook homolog 1 (Drosophila)                                                                    |
| 2.9 | 214993_at    |   | ASPHD1                     | aspartate beta-hydroxylase domain containing 1                                                 |
| 2.9 | 221538_s_at  |   | PLXNA1                     | plexin A1                                                                                      |
| 2.8 | 212472_at    | D | MICAL2                     | microtubule associated monooxygenase, calponin and LIM domain containing 2                     |
| 2.8 | 201699_at    |   | PSMC6                      | proteasome (prosome, macropain) 26S subunit, ATPase, 6                                         |
| 2.8 | 219280_at    |   | BRWD1                      | bromodomain and WD repeat domain containing 1                                                  |
| 2.8 | 225800_at    |   | JAZF1                      | JAZF zinc finger 1                                                                             |
| 2.8 | 226733_at    | D | PFKFB2                     | 6-phosphofructo-2-kinase/fructose-2,6-biphosphatase 2                                          |
| 2.8 | 228996_at    |   | RC3H1                      | ring finger and CCCH-type domains 1                                                            |
| 2.8 | 212483_at    | D | NIPBL                      | Nipped-B homolog (Drosophila)                                                                  |
| 2.8 | 208070_s_at  |   | REV3L                      | REV3-like, catalytic subunit of DNA polymerase zeta (yeast)                                    |
| 2.8 | 201471_s_at  |   | SQSTM1                     | sequestosome 1                                                                                 |
| 2.8 | 216294_s_at  |   | KIAA1109                   | KIAA1109                                                                                       |
| 2.8 | 232940_s_at  | D | MLL3                       | myeloid/lymphoid or mixed-lineage leukemia 3                                                   |
| 2.8 | 207843_x_at  | D | CYB5A (includes EG:109672) | cytochrome b5 type A (microsomal)                                                              |
| 2.8 | 205319_at    |   | PSCA                       | prostate stem cell antigen                                                                     |
| 2.8 | 1566342_at   | D | SOD2                       | superoxide dismutase 2, mitochondrial                                                          |
| 2.8 | 1553314_a_at |   | KIF19                      | kinesin family member 19                                                                       |
| 2.8 | 1553348_a_at | D | NFX1                       | nuclear transcription factor, X-box binding 1                                                  |
| 2.8 | 51158_at     | D | FAM174B                    | family with sequence similarity 174, member B                                                  |
| 2.8 | 204070_at    |   | RARRES3                    | retinoic acid receptor responder (tazarotene induced) 3                                        |
| 2.8 | 232644_x_at  | D | OCIAD1                     | OCIA domain containing 1                                                                       |
| 2.8 | 215412_x_at  |   | PMS2L2                     | postmeiotic segregation increased 2-like 2 pseudogene                                          |
| 2.8 | 229994_at    | D | NFIA                       | nuclear factor I/A                                                                             |

Hui L, Wick HC, Edlow AG, Cowan JM, Bianchi DJW. Global gene expression analysis of term amniotic fluid cell-free fetal RNA *Obstet Gynecol* 2013;121.

The authors provided this information as a supplement to their article.

© Copyright 2013 American College of Obstetricians and Gynecologists.

|     |              |   |                           |                                                                                                 |
|-----|--------------|---|---------------------------|-------------------------------------------------------------------------------------------------|
| 2.8 | 210676_x_at  | D | RGPD5 (includes others)   | RANBP2-like and GRIP domain containing 5                                                        |
| 2.8 | 243351_at    |   | FLJ31485                  | uncharacterized LOC440119                                                                       |
| 2.8 | 201340_s_at  | D | ENC1                      | ectodermal-neural cortex 1 (with BTB-like domain)                                               |
| 2.8 | 227099_s_at  |   | C11orf96                  | chromosome 11 open reading frame 96                                                             |
| 2.8 | 225026_at    |   | CHD6                      | chromodomain helicase DNA binding protein 6                                                     |
| 2.8 | 215918_s_at  |   | SPTBN1                    | spectrin, beta, non-erythrocytic 1                                                              |
| 2.8 | 234541_s_at  | D | ARHGEF12                  | Rho guanine nucleotide exchange factor (GEF) 12                                                 |
| 2.8 | 202033_s_at  | D | RB1CC1                    | RB1-inducible coiled-coil 1                                                                     |
| 2.8 | 204623_at    |   | TFF3                      | trefoil factor 3 (intestinal)                                                                   |
| 2.8 | 227228_s_at  |   | CCDC88C                   | coiled-coil domain containing 88C                                                               |
| 2.8 | 203394_s_at  |   | HES1 (includes EG:15205)  | hairy and enhancer of split 1, (Drosophila)                                                     |
| 2.8 | 1569138_a_at |   | SRCAP                     | Snf2-related CREBBP activator protein                                                           |
| 2.8 | 206323_x_at  |   | OPHN1                     | oligophrenin 1                                                                                  |
| 2.8 | 219844_at    | D | C10orf118                 | chromosome 10 open reading frame 118                                                            |
| 2.7 | 224736_at    |   | CCAR1                     | cell division cycle and apoptosis regulator 1                                                   |
| 2.7 | 225852_at    | D | ANKRD17                   | ankyrin repeat domain 17                                                                        |
| 2.7 | 224990_at    |   | C4orf34                   | chromosome 4 open reading frame 34                                                              |
| 2.7 | 1554015_a_at | D | CHD2                      | chromodomain helicase DNA binding protein 2                                                     |
| 2.7 | 205783_at    |   | KLK13                     | kallikrein-related peptidase 13                                                                 |
| 2.7 | 218422_s_at  |   | RBM26                     | RNA binding motif protein 26                                                                    |
| 2.7 | 213457_at    | D | MFHAS1                    | malignant fibrous histiocytoma amplified sequence 1                                             |
| 2.7 | 224976_at    | D | NFIA                      | nuclear factor I/A                                                                              |
| 2.7 | 225956_at    |   | CREBRF                    | CREB3 regulatory factor                                                                         |
| 2.7 | 226622_at    |   | MUC20                     | mucin 20, cell surface associated                                                               |
| 2.7 | 244272_s_at  | D | TC2N                      | tandem C2 domains, nuclear                                                                      |
| 2.7 | 226275_at    | D | MXD1                      | MAX dimerization protein 1                                                                      |
| 2.7 | 212479_s_at  |   | RMND5A                    | required for meiotic nuclear division 5 homolog A (S. cerevisiae)                               |
| 2.7 | 235144_at    | D | RASEF                     | RAS and EF-hand domain containing                                                               |
| 2.7 | 204857_at    |   | MAD1L1                    | MAD1 mitotic arrest deficient-like 1 (yeast)                                                    |
| 2.7 | 208502_s_at  |   | PITX1                     | paired-like homeodomain 1                                                                       |
| 2.7 | 202129_s_at  |   | RIOK3                     | RIO kinase 3 (yeast)                                                                            |
| 2.7 | 205520_at    | D | STRN                      | striatin, calmodulin binding protein                                                            |
| 2.7 | 226406_at    |   | C18orf25                  | chromosome 18 open reading frame 25                                                             |
| 2.7 | 226290_at    | D | BDP1 (includes EG:294687) | B double prime 1, subunit of RNA polymerase III transcription initiation factor IIIB            |
| 2.7 | 217741_s_at  |   | ZFAND5                    | zinc finger, AN1-type domain 5                                                                  |
| 2.7 | 220725_x_at  |   | DNAH3                     | dynein, axonemal, heavy chain 3                                                                 |
| 2.7 | 1553470_at   | D | DNAH17                    | dynein, axonemal, heavy chain 17                                                                |
| 2.7 | 210374_x_at  | D | PTGER3                    | prostaglandin E receptor 3 (subtype EP3)                                                        |
| 2.7 | 212224_at    |   | ALDH1A1                   | aldehyde dehydrogenase 1 family, member A1                                                      |
| 2.7 | 1553861_at   | D | TCP11L2                   | t-complex 11 (mouse)-like 2                                                                     |
| 2.7 | 212204_at    | D | TMEM87A                   | transmembrane protein 87A                                                                       |
| 2.7 | 1568618_a_at |   | GALNT1                    | UDP-N-acetyl-alpha-D-galactosamine: polypeptide N-acetylgalactosaminyltransferase 1 (GalNAc-T1) |

Hui L, Wick HC, Edlow AG, Cowan JM, Bianchi DJW. Global gene expression analysis of term amniotic fluid cell-free fetal RNA *Obstet Gynecol* 2013;121.

The authors provided this information as a supplement to their article.

© Copyright 2013 American College of Obstetricians and Gynecologists.

|     |              |   |                          |                                                                                                |
|-----|--------------|---|--------------------------|------------------------------------------------------------------------------------------------|
| 2.7 | 227337_at    |   | ANKRD37                  | ankyrin repeat domain 37                                                                       |
| 2.7 | 232240_at    |   | DNHD1                    | dynein heavy chain domain 1                                                                    |
| 2.7 | 215820_x_at  |   | SNX13                    | sorting nexin 13                                                                               |
| 2.7 | 210424_s_at  | D | GOLGA8A/GOLGA8B          | golgin A8 family, member A                                                                     |
| 2.7 | 211909_x_at  | D | PTGER3                   | prostaglandin E receptor 3 (subtype EP3)                                                       |
| 2.7 | 225141_at    | D | NFATC3                   | nuclear factor of activated T-cells, cytoplasmic, calcineurin-dependent 3                      |
| 2.7 | 231044_at    |   | C1orf194                 | chromosome 1 open reading frame 194                                                            |
| 2.7 | 202034_x_at  | D | RB1CC1                   | RB1-inducible coiled-coil 1                                                                    |
| 2.7 | 212840_at    |   | UBXN7                    | UBX domain protein 7                                                                           |
| 2.7 | 207108_s_at  | D | NIPBL                    | Nipped-B homolog (Drosophila)                                                                  |
| 2.7 | 213070_at    | D | PIK3C2A                  | phosphoinositide-3-kinase, class 2, alpha polypeptide                                          |
| 2.7 | 203060_s_at  | D | PAPSS2                   | 3'-phosphoadenosine 5'-phosphosulfate synthase 2                                               |
| 2.7 | 216125_s_at  | D | RANBP9                   | RAN binding protein 9                                                                          |
| 2.7 | 200914_x_at  |   | KTN1                     | kinectin 1 (kinesin receptor)                                                                  |
| 2.7 | 226094_at    | D | PIK3C2A                  | phosphoinositide-3-kinase, class 2, alpha polypeptide                                          |
| 2.7 | 202583_s_at  | D | RANBP9                   | RAN binding protein 9                                                                          |
| 2.7 | 1558675_s_at | D | NEMF                     | nuclear export mediator factor                                                                 |
| 2.7 | 213024_at    |   | TMF1                     | TATA element modulatory factor 1                                                               |
| 2.7 | 223881_at    | D | ICA1L                    | islet cell autoantigen 1,69kDa-like                                                            |
| 2.6 | 212672_at    |   | ATM                      | ataxia telangiectasia mutated                                                                  |
| 2.6 | 212260_at    |   | GIGYF2                   | GRB10 interacting GYF protein 2                                                                |
| 2.6 | 204615_x_at  | D | IDI1                     | isopentenyl-diphosphate delta isomerase 1                                                      |
| 2.6 | 210904_s_at  |   | IL13RA1                  | interleukin 13 receptor, alpha 1                                                               |
| 2.6 | 227551_at    | D | FAM108B1                 | family with sequence similarity 108, member B1                                                 |
| 2.6 | 1560445_x_at |   | ARHGEF1                  | Rho guanine nucleotide exchange factor (GEF) 1                                                 |
| 2.6 | 225048_at    |   | PHF10                    | PHD finger protein 10                                                                          |
| 2.6 | 227701_at    | D | C10orf118                | chromosome 10 open reading frame 118                                                           |
| 2.6 | 212057_at    |   | KIAA0182                 | KIAA0182                                                                                       |
| 2.6 | 200608_s_at  |   | RAD21                    | RAD21 homolog (S. pombe)                                                                       |
| 2.6 | 221902_at    |   | GPR153                   | G protein-coupled receptor 153                                                                 |
| 2.6 | 221158_at    |   | GCFC1                    | GC-rich sequence DNA-binding factor 1                                                          |
| 2.6 | 238002_at    |   | GOLIM4                   | golgi integral membrane protein 4                                                              |
| 2.6 | 229775_s_at  | D | MLLT4                    | myeloid/lymphoid or mixed-lineage leukemia (trithorax homolog, Drosophila); translocated to, 4 |
| 2.6 | 212842_x_at  | D | RGPD5 (includes others)  | RANBP2-like and GRIP domain containing 5                                                       |
| 2.6 | 212219_at    |   | PSME4                    | proteasome (prosome, macropain) activator subunit 4                                            |
| 2.6 | 1558392_at   | D | SYNE2                    | spectrin repeat containing, nuclear envelope 2                                                 |
| 2.6 | 231817_at    |   | USP53                    | ubiquitin specific peptidase 53                                                                |
| 2.6 | 213147_at    | D | HOXA10                   | homeobox A10                                                                                   |
| 2.6 | 229447_x_at  | D | NBPF11 (includes others) | neuroblastoma breakpoint family, member 11                                                     |
| 2.6 | 208262_x_at  |   | MEFV                     | Mediterranean fever                                                                            |
| 2.6 | 224476_s_at  |   | MESP1                    | mesoderm posterior 1 homolog (mouse)                                                           |

Hui L, Wick HC, Edlow AG, Cowan JM, Bianchi DJW. Global gene expression analysis of term amniotic fluid cell-free fetal RNA *Obstet Gynecol* 2013;121.

The authors provided this information as a supplement to their article.

© Copyright 2013 American College of Obstetricians and Gynecologists.

|     |              |   |                             |                                                                                 |
|-----|--------------|---|-----------------------------|---------------------------------------------------------------------------------|
| 2.6 | 201911_s_at  |   | FARP1                       | FERM, RhoGEF (ARHGEF) and pleckstrin domain protein 1 (chondrocyte-derived)     |
| 2.6 | 204243_at    |   | RLF                         | rearranged L-myc fusion                                                         |
| 2.6 | 201384_s_at  | D | NBR1                        | neighbor of BRCA1 gene 1                                                        |
| 2.6 | 203680_at    |   | PRKAR2B                     | protein kinase, cAMP-dependent, regulatory, type II, beta                       |
| 2.6 | 209435_s_at  | D | ARHGEF2                     | Rho/Rac guanine nucleotide exchange factor (GEF) 2                              |
| 2.6 | 219902_at    | D | BHMT2                       | betaine--homocysteine S-methyltransferase 2                                     |
| 2.6 | 228549_at    |   | TMEM63A                     | transmembrane protein 63A                                                       |
| 2.6 | 227334_at    |   | USP54                       | ubiquitin specific peptidase 54                                                 |
| 2.6 | 216232_s_at  |   | GCN1L1                      | GCN1 general control of amino-acid synthesis 1-like 1 (yeast)                   |
| 2.6 | 223403_s_at  |   | POLR1B                      | polymerase (RNA) I polypeptide B, 128kDa                                        |
| 2.6 | 201769_at    |   | CLINT1                      | clathrin interactor 1                                                           |
| 2.6 | 217908_s_at  | D | DCAF6                       | DDB1 and CUL4 associated factor 6                                               |
| 2.6 | 1556182_x_at |   | ANKRD65                     | ankyrin repeat domain 65                                                        |
| 2.6 | 225508_at    |   | KIAA1468                    | KIAA1468                                                                        |
| 2.6 | 202160_at    |   | CREBBP                      | CREB binding protein                                                            |
| 2.6 | 218311_at    |   | MAP4K3                      | mitogen-activated protein kinase kinase kinase kinase 3                         |
| 2.5 | 201711_x_at  | D | RANBP2                      | RAN binding protein 2                                                           |
| 2.5 | 230734_x_at  | D | STRN                        | striatin, calmodulin binding protein                                            |
| 2.5 | 212065_s_at  | D | USP34                       | ubiquitin specific peptidase 34                                                 |
| 2.5 | 223189_x_at  | D | MLL5                        | myeloid/lymphoid or mixed-lineage leukemia 5 (trithorax homolog, Drosophila)    |
| 2.5 | 201070_x_at  | D | SF3B1                       | splicing factor 3b, subunit 1, 155kDa                                           |
| 2.5 | 235110_at    |   | PLA2G16                     | phospholipase A2, group XVI                                                     |
| 2.5 | 208942_s_at  |   | SEC62 (includes EG: 294912) | SEC62 homolog (S. cerevisiae)                                                   |
| 2.5 | 224905_at    | D | WDR26                       | WD repeat domain 26                                                             |
| 2.5 | 213518_at    |   | PRKCI                       | protein kinase C, iota                                                          |
| 2.5 | 1565617_at   |   | KIAA1671                    | KIAA1671                                                                        |
| 2.5 | 231792_at    |   | MYLK2                       | myosin light chain kinase 2                                                     |
| 2.5 | 1558147_a_at |   | FLJ90757                    | uncharacterized LOC440465                                                       |
| 2.5 | 201085_s_at  |   | SON                         | SON DNA binding protein                                                         |
| 2.5 | 206482_at    |   | PTK6                        | PTK6 protein tyrosine kinase 6                                                  |
| 2.5 | 214088_s_at  |   | FUT3                        | fucosyltransferase 3 (galactoside 3(4)-L-fucosyltransferase, Lewis blood group) |
| 2.5 | 224369_s_at  |   | FBXO38                      | F-box protein 38                                                                |
| 2.5 | 208703_s_at  | D | APLP2                       | amyloid beta (A4) precursor-like protein 2                                      |
| 2.5 | 201348_at    | D | GPX3                        | glutathione peroxidase 3 (plasma)                                               |
| 2.5 | 224318_s_at  |   | KANSL3                      | KAT8 regulatory NSL complex subunit 3                                           |
| 2.5 | 219321_at    |   | MPP5                        | membrane protein, palmitoylated 5 (MAGUK p55 subfamily member 5)                |
| 2.5 | 224662_at    | D | KIF5B                       | kinesin family member 5B                                                        |
| 2.5 | 214869_x_at  |   | GAPVD1                      | GTPase activating protein and VPS9 domains 1                                    |
| 2.5 | 202917_s_at  | D | S100A8                      | S100 calcium binding protein A8                                                 |
| 2.5 | 200965_s_at  | D | ABLIM1                      | actin binding LIM protein 1                                                     |
| 2.5 | 225474_at    | D | MAG11 (includes EG: 14924)  | membrane associated guanylate kinase, WW and PDZ domain containing 1            |
| 2.5 | 242916_at    |   | CNTRL                       | centriolin                                                                      |

Hui L, Wick HC, Edlow AG, Cowan JM, Bianchi DJW. Global gene expression analysis of term amniotic fluid cell-free fetal RNA *Obstet Gynecol* 2013;121.

The authors provided this information as a supplement to their article.

© Copyright 2013 American College of Obstetricians and Gynecologists.

|     |              |   |                           |                                                                           |
|-----|--------------|---|---------------------------|---------------------------------------------------------------------------|
| 2.5 | 215393_s_at  | D | COBL1                     | COBL-like 1                                                               |
| 2.5 | 210827_s_at  |   | ELF3                      | E74-like factor 3 (ets domain transcription factor, epithelial-specific ) |
| 2.5 | 207705_s_at  |   | NINL                      | ninein-like                                                               |
| 2.5 | 204634_at    |   | NEK4                      | NIMA (never in mitosis gene a)-related kinase 4                           |
| 2.5 | 233632_s_at  |   | XRN1                      | 5'-3' exoribonuclease 1                                                   |
| 2.5 | 232859_s_at  | D | MAGI1 (includes EG:14924) | membrane associated guanylate kinase, WW and PDZ domain containing 1      |
| 2.5 | 211388_s_at  |   | NCOR2                     | nuclear receptor corepressor 2                                            |
| 2.5 | 211729_x_at  |   | BLVRA                     | biliverdin reductase A                                                    |
| 2.5 | 207186_s_at  |   | BPTF                      | bromodomain PHD finger transcription factor                               |
| 2.5 | 224194_at    |   | FCRL2                     | Fc receptor-like 2                                                        |
| 2.5 | 211697_x_at  |   | PNO1                      | partner of NOB1 homolog (S. cerevisiae)                                   |
| 2.5 | 210829_s_at  |   | SSBP2                     | single-stranded DNA binding protein 2                                     |
| 2.5 | 228278_at    | D | NFIX                      | nuclear factor I/X (CCAAT-binding transcription factor)                   |
| 2.5 | 214937_x_at  | D | PCM1                      | pericentriolar material 1                                                 |
| 2.5 | 218484_at    |   | NDUFA4L2                  | NADH dehydrogenase (ubiquinone) 1 alpha subcomplex, 4-like 2              |
| 2.5 | 211000_s_at  | D | IL6ST                     | interleukin 6 signal transducer (gp130, oncostatin M receptor)            |
| 2.5 | 210480_s_at  | D | MYO6                      | myosin VI                                                                 |
| 2.5 | 212392_s_at  |   | PDE4DIP                   | phosphodiesterase 4D interacting protein                                  |
| 2.5 | 226158_at    | D | KLHL24                    | kelch-like 24 (Drosophila)                                                |
| 2.5 | 201152_s_at  | D | MBNL1                     | muscleblind-like splicing regulator 1                                     |
| 2.5 | 209750_at    |   | NR1D2                     | nuclear receptor subfamily 1, group D, member 2                           |
| 2.5 | 214216_s_at  | D | LARP4B                    | La ribonucleoprotein domain family, member 4B                             |
| 2.5 | 242352_at    | D | NIPBL                     | Nipped-B homolog (Drosophila)                                             |
| 2.5 | 222187_x_at  | D | G3BP1                     | GTPase activating protein (SH3 domain) binding protein 1                  |
| 2.5 | 1569144_a_at |   | C9orf169                  | chromosome 9 open reading frame 169                                       |
| 2.4 | 214370_at    | D | S100A8                    | S100 calcium binding protein A8                                           |
| 2.4 | 212381_at    |   | USP24                     | ubiquitin specific peptidase 24                                           |
| 2.4 | 209772_s_at  | D | CD24                      | CD24 molecule                                                             |
| 2.4 | 224701_at    |   | PARP14                    | poly (ADP-ribose) polymerase family, member 14                            |
| 2.4 | 210564_x_at  | D | CFLAR                     | CASP8 and FADD-like apoptosis regulator                                   |
| 2.4 | 210020_x_at  |   | CALML3                    | calmodulin-like 3                                                         |
| 2.4 | 1559438_at   |   | C21orf58                  | chromosome 21 open reading frame 58                                       |
| 2.4 | 201689_s_at  |   | TPD52                     | tumor protein D52                                                         |
| 2.4 | 241683_at    | D | HECTD1                    | HECT domain containing E3 ubiquitin protein ligase 1                      |
| 2.4 | 1552314_a_at |   | EYA3                      | eyes absent homolog 3 (Drosophila)                                        |
| 2.4 | 211987_at    |   | TOP2B                     | topoisomerase (DNA) II beta 180kDa                                        |
| 2.4 | 223382_s_at  | D | ZNRF1                     | zinc and ring finger 1, E3 ubiquitin protein ligase                       |
| 2.4 | 226018_at    |   | C7orf41                   | chromosome 7 open reading frame 41                                        |
| 2.4 | 210151_s_at  |   | DYRK3                     | dual-specificity tyrosine-(Y)-phosphorylation regulated kinase 3          |
| 2.4 | 209255_at    |   | KLHDC10                   | kelch domain containing 10                                                |
| 2.4 | 210563_x_at  | D | CFLAR                     | CASP8 and FADD-like apoptosis regulator                                   |
| 2.4 | 229060_at    | D | YPEL2                     | yippee-like 2 (Drosophila)                                                |

Hui L, Wick HC, Edlow AG, Cowan JM, Bianchi DJW. Global gene expression analysis of term amniotic fluid cell-free fetal RNA *Obstet Gynecol* 2013;121.

The authors provided this information as a supplement to their article.

© Copyright 2013 American College of Obstetricians and Gynecologists.

|     |              |   |                            |                                                                                   |
|-----|--------------|---|----------------------------|-----------------------------------------------------------------------------------|
| 2.4 | 236715_x_at  | D | UACA                       | uveal autoantigen with coiled-coil domains and ankyrin repeats                    |
| 2.4 | 203421_at    |   | TP53I11                    | tumor protein p53 inducible protein 11                                            |
| 2.4 | 217739_s_at  |   | NAMPT                      | nicotinamide phosphoribosyltransferase                                            |
| 2.4 | 216734_s_at  |   | CXCR5                      | chemokine (C-X-C motif) receptor 5                                                |
| 2.4 | 221478_at    | D | BNIP3L                     | BCL2/adenovirus E1B 19kDa interacting protein 3-like                              |
| 2.4 | 201153_s_at  | D | MBNL1                      | muscleblind-like splicing regulator 1                                             |
| 2.4 | 201927_s_at  | D | PKP4                       | plakophilin 4                                                                     |
| 2.4 | 206438_x_at  |   | TCTN2                      | tectonic family member 2                                                          |
| 2.4 | 1553204_at   |   | C20orf166-AS1              | C20orf166 antisense RNA 1 (non-protein coding)                                    |
| 2.4 | 209898_x_at  |   | ITSN2                      | intersectin 2                                                                     |
| 2.4 | 1555262_a_at | D | MAG11 (includes EG:14924)  | membrane associated guanylate kinase, WW and PDZ domain containing 1              |
| 2.4 | 1553186_x_at | D | RASEF                      | RAS and EF-hand domain containing                                                 |
| 2.4 | 226100_at    | D | MLL5                       | myeloid/lymphoid or mixed-lineage leukemia 5 (trithorax homolog, Drosophila)      |
| 2.4 | 204363_at    |   | F3                         | coagulation factor III (thromboplastin, tissue factor)                            |
| 2.4 | 1557950_at   | D | NEMF                       | nuclear export mediator factor                                                    |
| 2.4 | 209239_at    |   | NFKB1                      | nuclear factor of kappa light polypeptide gene enhancer in B-cells 1              |
| 2.3 | 228432_at    |   | RAB3IP                     | RAB3A interacting protein (rabin3)                                                |
| 2.3 | 225131_at    | D | ZRANB1                     | zinc finger, RAN-binding domain containing 1                                      |
| 2.3 | 211922_s_at  | D | CAT                        | catalase                                                                          |
| 2.3 | 223818_s_at  |   | RSF1 (includes EG:233532)  | remodeling and spacing factor 1                                                   |
| 2.3 | 238530_at    |   | NNT                        | nicotinamide nucleotide transhydrogenase                                          |
| 2.3 | 207490_at    |   | TUBA4B                     | tubulin, alpha 4b (pseudogene)                                                    |
| 2.3 | 215978_x_at  |   | ZNF721                     | zinc finger protein 721                                                           |
| 2.3 | 1560078_at   | D | LAMA3                      | laminin, alpha 3                                                                  |
| 2.3 | 211116_at    |   | SLC9A2                     | solute carrier family 9, subfamily A (NHE2, cation proton antiporter 2), member 2 |
| 2.3 | 212066_s_at  | D | USP34                      | ubiquitin specific peptidase 34                                                   |
| 2.3 | 221479_s_at  | D | BNIP3L                     | BCL2/adenovirus E1B 19kDa interacting protein 3-like                              |
| 2.3 | 225077_at    | D | CHD2                       | chromodomain helicase DNA binding protein 2                                       |
| 2.3 | 215726_s_at  | D | CYB5A (includes EG:109672) | cytochrome b5 type A (microsomal)                                                 |
| 2.3 | 244774_at    | D | PHACTR2                    | phosphatase and actin regulator 2                                                 |
| 2.3 | 235009_at    |   | BOD1L                      | biorientation of chromosomes in cell division 1-like                              |
| 2.3 | 207365_x_at  | D | USP34                      | ubiquitin specific peptidase 34                                                   |
| 2.3 | 219675_s_at  |   | UXS1                       | UDP-glucuronate decarboxylase 1                                                   |
| 2.3 | 208651_x_at  | D | CD24                       | CD24 molecule                                                                     |
| 2.3 | 201104_x_at  | D | NBPF11 (includes others)   | neuroblastoma breakpoint family, member 11                                        |
| 2.3 | 218338_at    |   | PHC1                       | polyhomeotic homolog 1 (Drosophila)                                               |
| 2.3 | 209049_s_at  | D | ZMYND8                     | zinc finger, MYND-type containing 8                                               |
| 2.3 | 233057_at    |   | HSPB8                      | heat shock 22kDa protein 8                                                        |
| 2.3 | 225339_at    | D | SPAG9                      | sperm associated antigen 9                                                        |

Hui L, Wick HC, Edlow AG, Cowan JM, Bianchi DJW. Global gene expression analysis of term amniotic fluid cell-free fetal RNA Obstet Gynecol 2013;121.

The authors provided this information as a supplement to their article.

© Copyright 2013 American College of Obstetricians and Gynecologists.

|     |              |   |                           |                                                                                                     |
|-----|--------------|---|---------------------------|-----------------------------------------------------------------------------------------------------|
| 2.3 | 1555346_at   |   | CDC20B                    | cell division cycle 20 homolog B ( <i>S. cerevisiae</i> )                                           |
| 2.3 | 1563101_at   |   | ARNTL2                    | aryl hydrocarbon receptor nuclear translocator-like 2                                               |
| 2.3 | 220620_at    |   | CRCT1                     | cysteine-rich C-terminal 1                                                                          |
| 2.3 | 202693_s_at  |   | STK17A                    | serine/threonine kinase 17a                                                                         |
| 2.3 | 201733_at    |   | CLCN3                     | chloride channel, voltage-sensitive 3                                                               |
| 2.3 | 203431_s_at  |   | ARHGAP32                  | Rho GTPase activating protein 32                                                                    |
| 2.3 | 224227_s_at  | D | BDP1 (includes EG:294687) | B double prime 1, subunit of RNA polymerase III transcription initiation factor IIIB                |
| 2.3 | 203223_at    | D | RABEP1                    | rabaptin, RAB GTPase binding effector protein 1                                                     |
| 2.3 | 1552685_a_at |   | GRHL1                     | grainyhead-like 1 ( <i>Drosophila</i> )                                                             |
| 2.3 | 202174_s_at  | D | PCM1                      | pericentriolar material 1                                                                           |
| 2.3 | 218649_x_at  | D | NEMF                      | nuclear export mediator factor                                                                      |
| 2.3 | 241659_at    | D | JMJD1C                    | jumonji domain containing 1C                                                                        |
| 2.3 | 225093_at    |   | UTRN                      | utrophin                                                                                            |
| 2.3 | 229046_s_at  | D | PLEKHB1                   | pleckstrin homology domain containing, family B (evectins) member 1                                 |
| 2.3 | 212650_at    |   | EHBP1                     | EH domain binding protein 1                                                                         |
| 2.3 | 208991_at    |   | STAT3                     | signal transducer and activator of transcription 3 (acute-phase response factor)                    |
| 2.3 | 225213_at    |   | PPTC7                     | PTC7 protein phosphatase homolog ( <i>S. cerevisiae</i> )                                           |
| 2.3 | 220745_at    |   | IL19                      | interleukin 19                                                                                      |
| 2.3 | 217973_at    |   | DCXR                      | dicarbonyl/L-xylulose reductase                                                                     |
| 2.3 | 214305_s_at  | D | SF3B1                     | splicing factor 3b, subunit 1, 155kDa                                                               |
| 2.3 | 208952_s_at  | D | LARP4B                    | La ribonucleoprotein domain family, member 4B                                                       |
| 2.3 | 225139_at    | D | NFATC3                    | nuclear factor of activated T-cells, cytoplasmic, calcineurin-dependent 3                           |
| 2.3 | 229932_at    |   | RNF181                    | ring finger protein 181                                                                             |
| 2.3 | 217094_s_at  | D | ITCH                      | itchy E3 ubiquitin protein ligase                                                                   |
| 2.3 | 212067_s_at  |   | C1R                       | complement component 1, r subcomponent                                                              |
| 2.3 | 226388_at    |   | TCEA3                     | transcription elongation factor A (SII), 3                                                          |
| 2.3 | 212207_at    |   | MED13L                    | mediator complex subunit 13-like                                                                    |
| 2.3 | 202798_at    |   | SEC24B                    | SEC24 family, member B ( <i>S. cerevisiae</i> )                                                     |
| 2.3 | 203642_s_at  | D | COBL1                     | COBL-like 1                                                                                         |
| 2.3 | 218107_at    | D | WDR26                     | WD repeat domain 26                                                                                 |
| 2.3 | 223027_at    | D | SNX9                      | sorting nexin 9                                                                                     |
| 2.2 | 222745_s_at  |   | C15orf29                  | chromosome 15 open reading frame 29                                                                 |
| 2.2 | 212451_at    | D | SECISBP2L                 | SECIS binding protein 2-like                                                                        |
| 2.2 | 1555153_s_at |   | FCHO2                     | FCH domain only 2                                                                                   |
| 2.2 | 203216_s_at  | D | MYO6                      | myosin VI                                                                                           |
| 2.2 | 212445_s_at  | D | NEDD4L                    | neural precursor cell expressed, developmentally down-regulated 4-like, E3 ubiquitin protein ligase |
| 2.2 | 231825_x_at  |   | ATF7IP                    | activating transcription factor 7 interacting protein                                               |
| 2.2 | 211832_s_at  |   | MDM2                      | Mdm2, p53 E3 ubiquitin protein ligase homolog (mouse)                                               |
| 2.2 | 244495_x_at  | D | TMEM241                   | transmembrane protein 241                                                                           |
| 2.2 | 201583_s_at  |   | SEC23B                    | Sec23 homolog B ( <i>S. cerevisiae</i> )                                                            |
| 2.2 | 201914_s_at  | D | SEC63 (includes EG:11231) | SEC63 homolog ( <i>S. cerevisiae</i> )                                                              |

Hui L, Wick HC, Edlow AG, Cowan JM, Bianchi DJW. Global gene expression analysis of term amniotic fluid cell-free fetal RNA *Obstet Gynecol* 2013;121.

The authors provided this information as a supplement to their article.

© Copyright 2013 American College of Obstetricians and Gynecologists.



|     |              |   |                               |                                                              |
|-----|--------------|---|-------------------------------|--------------------------------------------------------------|
| 2.2 | 215434_x_at  | D | NBPF11 (includes others)      | neuroblastoma breakpoint family, member 11                   |
| 2.2 | 203725_at    |   | GADD45A                       | growth arrest and DNA-damage-inducible, alpha                |
| 2.2 | 228905_at    | D | PCM1                          | pericentriolar material 1                                    |
| 2.2 | 209771_x_at  | D | CD24                          | CD24 molecule                                                |
| 2.2 | 1554096_a_at |   | RBM33                         | RNA binding motif protein 33                                 |
| 2.2 | 216056_at    | D | CD44 (includes EG: 100330801) | CD44 molecule (Indian blood group)                           |
| 2.2 | 208773_s_at  | D | ANKHD1                        | ankyrin repeat and KH domain containing 1                    |
| 2.2 | 212659_s_at  | D | IL1RN                         | interleukin 1 receptor antagonist                            |
| 2.2 | 228363_at    |   | XIAP                          | X-linked inhibitor of apoptosis                              |
| 2.2 | 202514_at    | D | DLG1                          | discs, large homolog 1 (Drosophila)                          |
| 2.2 | 204022_at    |   | WWP2                          | WW domain containing E3 ubiquitin protein ligase 2           |
| 2.2 | 208704_x_at  | D | APLP2                         | amyloid beta (A4) precursor-like protein 2                   |
| 2.2 | 1555559_s_at | D | USP25                         | ubiquitin specific peptidase 25                              |
| 2.2 | 225507_at    |   | PNISR                         | PNN-interacting serine/arginine-rich protein                 |
| 2.2 | 223701_s_at  |   | USP47                         | ubiquitin specific peptidase 47                              |
| 2.2 | 225447_at    |   | GPD2                          | glycerol-3-phosphate dehydrogenase 2 (mitochondrial)         |
| 2.2 | 201800_s_at  |   | OSBP                          | oxysterol binding protein                                    |
| 2.2 | 212460_at    |   | SPTSSA                        | serine palmitoyltransferase, small subunit A                 |
| 2.2 | 216162_at    |   | SBNO1                         | strawberry notch homolog 1 (Drosophila)                      |
| 2.2 | 202516_s_at  | D | DLG1                          | discs, large homolog 1 (Drosophila)                          |
| 2.2 | 227990_at    |   | SLU7 (includes EG: 10569)     | SLU7 splicing factor homolog (S. cerevisiae)                 |
| 2.2 | 210051_at    |   | RAPGEF3                       | Rap guanine nucleotide exchange factor (GEF) 3               |
| 2.2 | 215182_x_at  |   | MYH9                          | myosin, heavy chain 9, non-muscle                            |
| 2.2 | 266_s_at     | D | CD24                          | CD24 molecule                                                |
| 2.2 | 226740_x_at  | D | NBPF11 (includes others)      | neuroblastoma breakpoint family, member 11                   |
| 2.2 | 228964_at    |   | PRDM1                         | PR domain containing 1, with ZNF domain                      |
| 2.2 | 220090_at    |   | CRNN                          | cornulin                                                     |
| 2.2 | 217951_s_at  | D | PHF3                          | PHD finger protein 3                                         |
| 2.1 | 203509_at    |   | SORL1                         | sortilin-related receptor, L(DLR class) A repeats containing |
| 2.1 | 215041_s_at  | D | DOCK9                         | dedicator of cytokinesis 9                                   |
| 2.1 | 205412_at    |   | ACAT1                         | acetyl-CoA acetyltransferase 1                               |
| 2.1 | 214665_s_at  | D | CHP                           | calcium binding protein P22                                  |
| 2.1 | 229051_at    | D | YPEL2                         | yippee-like 2 (Drosophila)                                   |
| 2.1 | 234688_x_at  |   | CNTROB                        | centrobin, centrosomal BRCA2 interacting protein             |
| 2.1 | 203531_at    |   | CUL5                          | cullin 5                                                     |
| 2.1 | 203499_at    |   | EPHA2                         | EPH receptor A2                                              |
| 2.1 | 203007_x_at  |   | LYPLA1                        | lysophospholipase I                                          |
| 2.1 | 227460_at    |   | FAM208A                       | family with sequence similarity 208, member A                |
| 2.1 | 224493_x_at  | D | TMEM241                       | transmembrane protein 241                                    |
| 2.1 | 213236_at    | D | SASH1                         | SAM and SH3 domain containing 1                              |

Hui L, Wick HC, Edlow AG, Cowan JM, Bianchi DJW. Global gene expression analysis of term amniotic fluid cell-free fetal RNA *Obstet Gynecol* 2013;121.

The authors provided this information as a supplement to their article.

© Copyright 2013 American College of Obstetricians and Gynecologists.

|     |              |   |               |                                                                                                                                                  |
|-----|--------------|---|---------------|--------------------------------------------------------------------------------------------------------------------------------------------------|
| 2.1 | 1555401_at   |   | SOHLH2        | spermatogenesis and oogenesis specific basic helix-loop-helix 2                                                                                  |
| 2.1 | 202054_s_at  | D | ALDH3A2       | aldehyde dehydrogenase 3 family, member A2                                                                                                       |
| 2.1 | 201413_at    |   | HSD17B4       | hydroxysteroid (17-beta) dehydrogenase 4                                                                                                         |
| 2.1 | 223577_x_at  | D | MALAT1        | metastasis associated lung adenocarcinoma transcript 1 (non-protein coding)                                                                      |
| 2.1 | 203675_at    |   | NUCB2         | nucleobindin 2                                                                                                                                   |
| 2.1 | 204896_s_at  |   | PTGER4        | prostaglandin E receptor 4 (subtype EP4)                                                                                                         |
| 2.1 | 212815_at    |   | ASCC3         | activating signal cointegrator 1 complex subunit 3                                                                                               |
| 2.1 | 240700_at    | D | TOR1AIP2      | torsin A interacting protein 2                                                                                                                   |
| 2.1 | 238028_at    | D | C6orf132      | chromosome 6 open reading frame 132                                                                                                              |
| 2.1 | 202721_s_at  | D | GFPT1         | glutamine--fructose-6-phosphate transaminase 1                                                                                                   |
| 2.1 | 209048_s_at  | D | ZMYND8        | zinc finger, MYND-type containing 8                                                                                                              |
| 2.1 | 227924_at    |   | INO80D        | INO80 complex subunit D                                                                                                                          |
| 2.1 | 225064_at    | D | RABEP1        | rabaptin, RAB GTPase binding effector protein 1                                                                                                  |
| 2.1 | 212450_at    | D | SECISBP2L     | SECIS binding protein 2-like                                                                                                                     |
| 2.1 | 231735_s_at  | D | MALAT1        | metastasis associated lung adenocarcinoma transcript 1 (non-protein coding)                                                                      |
| 2.1 | 231974_at    |   | MLL2          | myeloid/lymphoid or mixed-lineage leukemia 2                                                                                                     |
| 2.1 | 217954_s_at  | D | PHF3          | PHD finger protein 3                                                                                                                             |
| 2.1 | 214939_x_at  | D | MLLT4         | myeloid/lymphoid or mixed-lineage leukemia (trithorax homolog, Drosophila); translocated to, 4                                                   |
| 2.1 | 216243_s_at  | D | IL1RN         | interleukin 1 receptor antagonist                                                                                                                |
| 2.1 | 224836_at    |   | TP53INP2      | tumor protein p53 inducible nuclear protein 2                                                                                                    |
| 2.1 | 201206_s_at  |   | RRBP1         | ribosome binding protein 1 homolog 180kDa (dog)                                                                                                  |
| 2.1 | 1564308_a_at |   | MPP7          | membrane protein, palmitoylated 7 (MAGUK p55 subfamily member 7)                                                                                 |
| 2.1 | 241455_at    | D | C6orf132      | chromosome 6 open reading frame 132                                                                                                              |
| 2.1 | 1553542_at   |   | CCDC125       | coiled-coil domain containing 125                                                                                                                |
| 2.1 | 205228_at    |   | RBMS2         | RNA binding motif, single stranded interacting protein 2                                                                                         |
| 2.1 | 203713_s_at  |   | LLGL2         | lethal giant larvae homolog 2 (Drosophila)                                                                                                       |
| 2.1 | 220351_at    |   | CCRL1         | chemokine (C-C motif) receptor-like 1                                                                                                            |
| 2.1 | 1558678_s_at | D | MALAT1        | metastasis associated lung adenocarcinoma transcript 1 (non-protein coding)                                                                      |
| 2.1 | 221526_x_at  | D | PARD3         | par-3 partitioning defective 3 homolog (C. elegans)                                                                                              |
| 2.1 | 222148_s_at  |   | RHOT1         | ras homolog family member T1                                                                                                                     |
| 2.1 | 41644_at     | D | SASH1         | SAM and SH3 domain containing 1                                                                                                                  |
| 2.1 | 243786_at    |   | ZDHHC20       | zinc finger, DHHC-type containing 20                                                                                                             |
| 2.1 | 218933_at    |   | SPATA5L1      | spermatogenesis associated 5-like 1                                                                                                              |
| 2.1 | 211653_x_at  |   | AKR1C1/AKR1C2 | aldo-keto reductase family 1, member C2 (dihydrodiol dehydrogenase 2; bile acid binding protein; 3-alpha hydroxysteroid dehydrogenase, type III) |
| 2.1 | 202631_s_at  |   | APPBP2        | amyloid beta precursor protein (cytoplasmic tail) binding protein 2                                                                              |

Hui L, Wick HC, Edlow AG, Cowan JM, Bianchi DJW. Global gene expression analysis of term amniotic fluid cell-free fetal RNA *Obstet Gynecol* 2013;121.

The authors provided this information as a supplement to their article.

© Copyright 2013 American College of Obstetricians and Gynecologists.

|     |             |   |                           |                                                                                                     |
|-----|-------------|---|---------------------------|-----------------------------------------------------------------------------------------------------|
| 2.1 | 202011_at   |   | TJP1 (includes EG:21872)  | tight junction protein 1 (zona occludens 1)                                                         |
| 2.1 | 219267_at   | D | GLTP                      | glycolipid transfer protein                                                                         |
| 2.1 | 243495_s_at |   | ZNF652                    | zinc finger protein 652                                                                             |
| 2.1 | 213988_s_at | D | SAT1                      | spermidine/spermine N1-acetyltransferase 1                                                          |
| 2.1 | 200976_s_at | D | TAX1BP1                   | Tax1 (human T-cell leukemia virus type I) binding protein 1                                         |
| 2.1 | 222467_s_at |   | PPP6R3                    | protein phosphatase 6, regulatory subunit 3                                                         |
| 2.0 | 209373_at   |   | MALL                      | mal, T-cell differentiation protein-like                                                            |
| 2.0 | 201103_x_at | D | NBPF11 (includes others)  | neuroblastoma breakpoint family, member 11                                                          |
| 2.0 | 200970_s_at |   | SERP1                     | stress-associated endoplasmic reticulum protein 1                                                   |
| 2.0 | 218539_at   |   | FBXO34                    | F-box protein 34                                                                                    |
| 2.0 | 227205_at   |   | TAF1 (includes EG:270627) | TAF1 RNA polymerase II, TATA box binding protein (TBP)-associated factor, 250kDa                    |
| 2.0 | 1567906_at  |   | SOX4                      | SRY (sex determining region Y)-box 4                                                                |
| 2.0 | 223129_x_at | D | MYLIP                     | myosin regulatory light chain interacting protein                                                   |
| 2.0 | 236490_at   | D | NEDD4L                    | neural precursor cell expressed, developmentally down-regulated 4-like, E3 ubiquitin protein ligase |
| 2.0 | 230618_s_at | D | PRRC2C                    | proline-rich coiled-coil 2C                                                                         |
| 2.0 | 211465_x_at | D | FUT6                      | fucosyltransferase 6 (alpha (1,3) fucosyltransferase)                                               |
| 2.0 | 213850_s_at |   | SCAF11                    | SR-related CTD-associated factor 11                                                                 |
| 2.0 | 210461_s_at | D | ABLIM1                    | actin binding LIM protein 1                                                                         |
| 2.0 | 208809_s_at |   | C6orf62                   | chromosome 6 open reading frame 62                                                                  |
| 2.0 | 201546_at   |   | TRIP12                    | thyroid hormone receptor interactor 12                                                              |
| 2.0 | 210547_x_at |   | ICA1                      | islet cell autoantigen 1, 69kDa                                                                     |
| 2.0 | 223233_s_at |   | CGN                       | cingulin                                                                                            |
| 2.0 | 222119_s_at |   | FBXO11                    | F-box protein 11                                                                                    |
| 2.0 | 238349_at   |   | UBN2                      | ubiquitin 2                                                                                         |
| 2.0 | 226010_at   |   | SLC25A23                  | solute carrier family 25 (mitochondrial carrier; phosphate carrier), member 23                      |
| 2.0 | 236243_at   |   | ZCCHC6                    | zinc finger, CCHC domain containing 6                                                               |
| 2.0 | 225921_at   |   | NIN                       | ninein (GSK3B interacting protein)                                                                  |
| 2.0 | 213612_x_at | D | NBPF11 (includes others)  | neuroblastoma breakpoint family, member 11                                                          |
| 2.0 | 225138_at   | D | ZRANB1                    | zinc finger, RAN-binding domain containing 1                                                        |
| 2.0 | 235055_x_at |   | MUC4                      | mucin 4, cell surface associated                                                                    |
| 2.0 | 209046_s_at |   | GABARAPL2                 | GABA(A) receptor-associated protein-like 2                                                          |
| 2.0 | 200899_s_at | D | MGEA5                     | meningioma expressed antigen 5 (hyaluronidase)                                                      |
| 2.0 | 212455_at   |   | YTHDC1                    | YTH domain containing 1                                                                             |
| 2.0 | 201324_at   | D | EMP1                      | epithelial membrane protein 1                                                                       |
| 2.0 | 218024_at   |   | BRP44L                    | brain protein 44-like                                                                               |
| 2.0 | 202084_s_at |   | SEC14L1                   | SEC14-like 1 ( <i>S. cerevisiae</i> )                                                               |
| 2.0 | 202722_s_at | D | GFPT1                     | glutamine--fructose-6-phosphate transaminase 1                                                      |
| 2.0 | 214124_x_at |   | FGFR1OP                   | FGFR1 oncogene partner                                                                              |

Hui L, Wick HC, Edlow AG, Cowan JM, Bianchi DJW. Global gene expression analysis of term amniotic fluid cell-free fetal RNA *Obstet Gynecol* 2013;121.

The authors provided this information as a supplement to their article.

© Copyright 2013 American College of Obstetricians and Gynecologists.

|     |              |   |              |                                                                                                         |
|-----|--------------|---|--------------|---------------------------------------------------------------------------------------------------------|
| 2.0 | 208881_x_at  | D | IDI1         | isopentenyl-diphosphate delta isomerase 1                                                               |
| 2.0 | 208661_s_at  | D | TTC3         | tetratricopeptide repeat domain 3                                                                       |
| 2.0 | 244396_at    | D | G3BP1        | GTPase activating protein (SH3 domain) binding protein 1                                                |
| 2.0 | 212263_at    | D | QKI          | QKI, KH domain containing, RNA binding                                                                  |
| 2.0 | 233811_at    |   | RIN2         | Ras and Rab interactor 2                                                                                |
| 2.0 | 229399_at    | D | C10orf118    | chromosome 10 open reading frame 118                                                                    |
| 2.0 | 1553588_at   |   | SH3KBP1      | SH3-domain kinase binding protein 1                                                                     |
| 2.0 | 208663_s_at  | D | TTC3         | tetratricopeptide repeat domain 3                                                                       |
| 1.9 | 216085_at    |   | DKFZP434C153 | DKFZP434C153 protein                                                                                    |
| 1.9 | 201991_s_at  | D | KIF5B        | kinesin family member 5B                                                                                |
| 1.9 | 214941_s_at  | D | PRPF40A      | PRP40 pre-mRNA processing factor 40 homolog A ( <i>S. cerevisiae</i> )                                  |
| 1.9 | 209996_x_at  | D | PCM1         | pericentriolar material 1                                                                               |
| 1.9 | 226739_at    |   | RNF169       | ring finger protein 169                                                                                 |
| 1.9 | 211475_s_at  | D | BAG1         | BCL2-associated athanogene                                                                              |
| 1.9 | 228436_at    |   | KCNC4        | potassium voltage-gated channel, Shaw-related subfamily, member 4                                       |
| 1.9 | 242192_at    | D | YPEL2        | yippee-like 2 ( <i>Drosophila</i> )                                                                     |
| 1.9 | 222762_x_at  |   | LIMD1        | LIM domains containing 1                                                                                |
| 1.9 | 200861_at    | D | CNOT1        | CCR4-NOT transcription complex, subunit 1                                                               |
| 1.9 | 228196_s_at  | D | LARP4B       | La ribonucleoprotein domain family, member 4B                                                           |
| 1.9 | 217848_s_at  |   | PPA1         | pyrophosphatase (inorganic) 1                                                                           |
| 1.9 | 232066_x_at  |   | CTBP1-AS1    | CTBP1 antisense RNA 1 (non-protein coding)                                                              |
| 1.9 | 200977_s_at  | D | TAX1BP1      | Tax1 (human T-cell leukemia virus type I) binding protein 1                                             |
| 1.9 | 203837_at    |   | MAP3K5       | mitogen-activated protein kinase kinase kinase 5                                                        |
| 1.9 | 225265_at    |   | RBMS1        | RNA binding motif, single stranded interacting protein 1                                                |
| 1.9 | 233230_s_at  |   | SLAIN2       | SLAIN motif family, member 2                                                                            |
| 1.9 | 207276_at    |   | CDR1         | cerebellar degeneration-related protein 1, 34kDa                                                        |
| 1.9 | 225992_at    |   | MLLT10       | myeloid/lymphoid or mixed-lineage leukemia (trithorax homolog, <i>Drosophila</i> ); translocated to, 10 |
| 1.9 | 218129_s_at  | D | NFYB         | nuclear transcription factor Y, beta                                                                    |
| 1.9 | 232975_at    |   | HCG18        | HLA complex group 18 (non-protein coding)                                                               |
| 1.9 | 228520_s_at  | D | APLP2        | amyloid beta (A4) precursor-like protein 2                                                              |
| 1.9 | 219084_at    |   | NSD1         | nuclear receptor binding SET domain protein 1                                                           |
| 1.9 | 215438_x_at  |   | GSPT1        | G1 to S phase transition 1                                                                              |
| 1.9 | 210592_s_at  | D | SAT1         | spermidine/spermine N1-acetyltransferase 1                                                              |
| 1.9 | 1565436_s_at | D | MLL          | myeloid/lymphoid or mixed-lineage leukemia (trithorax homolog, <i>Drosophila</i> )                      |
| 1.9 | 226683_at    |   | SNX18        | sorting nexin 18                                                                                        |
| 1.9 | 210645_s_at  | D | TTC3         | tetratricopeptide repeat domain 3                                                                       |
| 1.9 | 1553212_at   |   | KRT78        | keratin 78                                                                                              |
| 1.9 | 200620_at    |   | TMEM59       | transmembrane protein 59                                                                                |
| 1.9 | 213796_at    |   | SPRR1A       | small proline-rich protein 1A                                                                           |
| 1.9 | 212211_at    | D | ANKRD17      | ankyrin repeat domain 17                                                                                |

Hui L, Wick HC, Edlow AG, Cowan JM, Bianchi DJW. Global gene expression analysis of term amniotic fluid cell-free fetal RNA *Obstet Gynecol* 2013;121.

The authors provided this information as a supplement to their article.

© Copyright 2013 American College of Obstetricians and Gynecologists.

|     |              |   |                          |                                                                    |
|-----|--------------|---|--------------------------|--------------------------------------------------------------------|
| 1.9 | 212854_x_at  | D | NBPF11 (includes others) | neuroblastoma breakpoint family, member 11                         |
| 1.9 | 225771_at    | D | AP1G1                    | adaptor-related protein complex 1, gamma 1 subunit                 |
| 1.9 | 1555154_a_at | D | QKI                      | QKI, KH domain containing, RNA binding                             |
| 1.9 | 210094_s_at  | D | PARD3                    | par-3 partitioning defective 3 homolog (C. elegans)                |
| 1.9 | 225816_at    | D | PHF17                    | PHD finger protein 17                                              |
| 1.9 | 202220_at    |   | KIAA0907                 | KIAA0907                                                           |
| 1.8 | 211325_x_at  |   | DSTNP2                   | destrin (actin depolymerizing factor) pseudogene 2                 |
| 1.8 | 211316_x_at  | D | CFLAR                    | CASP8 and FADD-like apoptosis regulator                            |
| 1.8 | 211944_at    | D | PRRC2C                   | proline-rich coiled-coil 2C                                        |
| 1.8 | 231699_at    |   | LOC100289251             | uncharacterized LOC100289251                                       |
| 1.8 | 1553694_a_at | D | PIK3C2A                  | phosphoinositide-3-kinase, class 2, alpha polypeptide              |
| 1.8 | 201056_at    |   | GOLGB1                   | golgin B1                                                          |
| 1.8 | 1555202_a_at |   | RPRD1A                   | regulation of nuclear pre-mRNA domain containing 1A                |
| 1.8 | 216721_at    |   | SLC25A30                 | solute carrier family 25, member 30                                |
| 1.8 | 201266_at    |   | TXNRD1                   | thioredoxin reductase 1                                            |
| 1.8 | 231830_x_at  | D | RAB11FIP1                | RAB11 family interacting protein 1 (class I)                       |
| 1.8 | 216379_x_at  | D | CD24                     | CD24 molecule                                                      |
| 1.8 | 203350_at    | D | AP1G1                    | adaptor-related protein complex 1, gamma 1 subunit                 |
| 1.8 | 212688_at    |   | PIK3CB                   | phosphoinositide-3-kinase, catalytic, beta polypeptide             |
| 1.8 | 202584_at    | D | NFX1                     | nuclear transcription factor, X-box binding 1                      |
| 1.8 | 213009_s_at  | D | TRIM37                   | tripartite motif containing 37                                     |
| 1.8 | 215667_x_at  |   | PMS2P1                   | postmeiotic segregation increased 2 pseudogene 1                   |
| 1.8 | 212166_at    |   | XPO7                     | exportin 7                                                         |
| 1.8 | 223662_x_at  |   | DDX59                    | DEAD (Asp-Glu-Ala-Asp) box polypeptide 59                          |
| 1.8 | 216550_x_at  |   | ANKRD12                  | ankyrin repeat domain 12                                           |
| 1.8 | 200791_s_at  |   | IQGAP1                   | IQ motif containing GTPase activating protein 1                    |
| 1.8 | 220285_at    | D | FAM108B1                 | family with sequence similarity 108, member B1                     |
| 1.8 | 212914_at    |   | CBX7                     | chromobox homolog 7                                                |
| 1.8 | 218053_at    | D | PRPF40A                  | PRP40 pre-mRNA processing factor 40 homolog A (S. cerevisiae)      |
| 1.8 | 217877_s_at  |   | GPBP1L1                  | GC-rich promoter binding protein 1-like 1                          |
| 1.8 | 219443_at    | D | TASP1                    | taspase, threonine aspartase, 1                                    |
| 1.8 | 227676_at    |   | FAM3D                    | family with sequence similarity 3, member D                        |
| 1.8 | 201972_at    |   | ATP6V1A                  | ATPase, H+ transporting, lysosomal 70kDa, V1 subunit A             |
| 1.8 | 224897_at    | D | WDR26                    | WD repeat domain 26                                                |
| 1.8 | 212138_at    |   | PDS5A                    | PDS5, regulator of cohesion maintenance, homolog A (S. cerevisiae) |
| 1.8 | 244046_at    |   | URGCP                    | upregulator of cell proliferation                                  |
| 1.8 | 224687_at    |   | ANKIB1                   | ankyrin repeat and IBR domain containing 1                         |
| 1.8 | 218913_s_at  |   | GMIP                     | GEM interacting protein                                            |

Hui L, Wick HC, Edlow AG, Cowan JM, Bianchi DJW. Global gene expression analysis of term amniotic fluid cell-free fetal RNA *Obstet Gynecol* 2013;121.

The authors provided this information as a supplement to their article.

© Copyright 2013 American College of Obstetricians and Gynecologists.

|     |              |   |                          |                                                                      |
|-----|--------------|---|--------------------------|----------------------------------------------------------------------|
| 1.8 | 204971_at    |   | CSTA                     | cystatin A (stefin A)                                                |
| 1.8 | 208638_at    |   | PDIA6                    | protein disulfide isomerase family A, member 6                       |
| 1.8 | 203535_at    |   | S100A9                   | S100 calcium binding protein A9                                      |
| 1.8 | 202302_s_at  |   | RSRC2                    | arginine/serine-rich coiled-coil 2                                   |
| 1.8 | 224862_at    |   | GNAQ                     | guanine nucleotide binding protein (G protein), q polypeptide        |
| 1.7 | 210150_s_at  |   | LAMA5                    | laminin, alpha 5                                                     |
| 1.7 | 208710_s_at  |   | AP3D1                    | adaptor-related protein complex 3, delta 1 subunit                   |
| 1.7 | 201499_s_at  |   | USP7                     | ubiquitin specific peptidase 7 (herpes virus-associated)             |
| 1.7 | 201333_s_at  | D | ARHGEF12                 | Rho guanine nucleotide exchange factor (GEF) 12                      |
| 1.7 | 215179_x_at  |   | PGF                      | placental growth factor                                              |
| 1.7 | 226706_at    |   | QSOX1                    | quiescin Q6 sulfhydryl oxidase 1                                     |
| 1.7 | 224810_s_at  |   | ANKRD13A                 | ankyrin repeat domain 13A                                            |
| 1.7 | 232215_x_at  | D | PRR11                    | proline rich 11                                                      |
| 1.7 | 209402_s_at  |   | SLC12A4                  | solute carrier family 12 (potassium/chloride transporters), member 4 |
| 1.7 | 230712_at    | D | NBPF11 (includes others) | neuroblastoma breakpoint family, member 11                           |
| 1.7 | 220181_x_at  |   | SLC30A5                  | solute carrier family 30 (zinc transporter), member 5                |
| 1.7 | 203407_at    |   | PPL                      | periplakin                                                           |
| 1.7 | 218829_s_at  |   | CHD7                     | chromodomain helicase DNA binding protein 7                          |
| 1.7 | 1555037_a_at |   | IDH1                     | isocitrate dehydrogenase 1 (NADP+), soluble                          |
| 1.7 | 231988_x_at  |   | ZNF490                   | zinc finger protein 490                                              |
| 1.7 | 210707_x_at  |   | DTX2P1-UPK3BP1-PMS2P11   | DTX2P1-UPK3BP1-PMS2P11 readthrough (non-protein coding)              |
| 1.7 | 222983_s_at  |   | PAIP2                    | poly(A) binding protein interacting protein 2                        |
| 1.7 | 200811_at    |   | CIRBP                    | cold inducible RNA binding protein                                   |
| 1.7 | 202738_s_at  |   | PHKB                     | phosphorylase kinase, beta                                           |
| 1.7 | 239748_x_at  | D | OCIAD1                   | OCIA domain containing 1                                             |
| 1.7 | 209259_s_at  |   | SMC3                     | structural maintenance of chromosomes 3                              |
| 1.7 | 231975_s_at  |   | MIER3                    | mesoderm induction early response 1, family member 3                 |
| 1.7 | 222015_at    |   | CSNK1E                   | casein kinase 1, epsilon                                             |
| 1.7 | 206792_x_at  |   | PDE4C                    | phosphodiesterase 4C, cAMP-specific                                  |
| 1.7 | 209186_at    |   | ATP2A2                   | ATPase, Ca++ transporting, cardiac muscle, slow twitch 2             |
| 1.7 | 1563560_at   |   | AHNAK                    | AHNAK nucleoprotein                                                  |
| 1.7 | 202097_at    |   | NUP153                   | nucleoporin 153kDa                                                   |
| 1.7 | 1568888_at   |   | LOC100507283             | uncharacterized LOC100507283                                         |
| 1.7 | 215499_at    |   | MAP2K3                   | mitogen-activated protein kinase kinase 3                            |
| 1.7 | 218205_s_at  |   | MKNK2                    | MAP kinase interacting serine/threonine kinase 2                     |
| 1.7 | 200860_s_at  | D | CNOT1                    | CCR4-NOT transcription complex, subunit 1                            |
| 1.6 | 225177_at    | D | RAB11FIP1                | RAB11 family interacting protein 1 (class I)                         |
| 1.6 | 208720_s_at  |   | RBM39                    | RNA binding motif protein 39                                         |

Hui L, Wick HC, Edlow AG, Cowan JM, Bianchi DJW. Global gene expression analysis of term amniotic fluid cell-free fetal RNA *Obstet Gynecol* 2013;121.

The authors provided this information as a supplement to their article.

© Copyright 2013 American College of Obstetricians and Gynecologists.

|     |              |   |                            |                                                                                      |
|-----|--------------|---|----------------------------|--------------------------------------------------------------------------------------|
| 1.6 | 201021_s_at  |   | DSTN                       | destrin (actin depolymerizing factor)                                                |
| 1.6 | 229356_x_at  |   | INO80 (includes EG:296084) | INO80 homolog ( <i>S. cerevisiae</i> )                                               |
| 1.6 | 212269_s_at  |   | MCM3AP                     | minichromosome maintenance complex component 3 associated protein                    |
| 1.6 | 204536_s_at  |   | REST                       | RE1-silencing transcription factor                                                   |
| 1.6 | 211578_s_at  |   | RPS6KB1                    | ribosomal protein S6 kinase, 70kDa, polypeptide 1                                    |
| 1.6 | 202387_at    | D | BAG1                       | BCL2-associated athanogene                                                           |
| 1.6 | 239364_at    |   | ETV6                       | ets variant 6                                                                        |
| 1.6 | 221522_at    |   | ANKRD27                    | ankyrin repeat domain 27 (VPS9 domain)                                               |
| 1.6 | 214435_x_at  |   | RALA                       | v-ral simian leukemia viral oncogene homolog A (ras related)                         |
| 1.6 | 208702_x_at  | D | APLP2                      | amyloid beta (A4) precursor-like protein 2                                           |
| 1.6 | 212657_s_at  | D | IL1RN                      | interleukin 1 receptor antagonist                                                    |
| 1.6 | 1558825_s_at |   | NBPF3                      | neuroblastoma breakpoint family, member 3                                            |
| 1.6 | 211549_s_at  |   | HPGD                       | hydroxyprostaglandin dehydrogenase 15-(NAD)                                          |
| 1.6 | 218098_at    |   | ARFGEF2                    | ADP-ribosylation factor guanine nucleotide-exchange factor 2 (brefeldin A-inhibited) |
| 1.6 | 201183_s_at  |   | CHD4                       | chromodomain helicase DNA binding protein 4                                          |
| 1.6 | 200614_at    |   | CLTC                       | clathrin, heavy chain (Hc)                                                           |
| 1.6 | 214473_x_at  |   | PMS2P3                     | postmeiotic segregation increased 2 pseudogene 3                                     |
| 1.6 | 212481_s_at  | D | TPM4                       | tropomyosin 4                                                                        |
| 1.6 | 208895_s_at  |   | DDX18                      | DEAD (Asp-Glu-Ala-Asp) box polypeptide 18                                            |
| 1.6 | 215823_x_at  |   | RLIM                       | ring finger protein, LIM domain interacting                                          |
| 1.6 | 205596_s_at  |   | SMURF2                     | SMAD specific E3 ubiquitin protein ligase 2                                          |
| 1.5 | 1556854_at   |   | LOC283501                  | uncharacterized LOC283501                                                            |
| 1.5 | 237444_at    |   | KIF13A                     | kinesin family member 13A                                                            |
| 1.5 | 204048_s_at  | D | PHACTR2                    | phosphatase and actin regulator 2                                                    |
| 1.5 | 207993_s_at  | D | CHP                        | calcium binding protein P22                                                          |
| 1.5 | 212165_at    |   | TMEM183A                   | transmembrane protein 183A                                                           |
| 1.5 | 220419_s_at  | D | USP25                      | ubiquitin specific peptidase 25                                                      |
| 1.5 | 226851_at    |   | LYPLAL1                    | lysophospholipase-like 1                                                             |
| 1.5 | 201375_s_at  |   | PPP2CB                     | protein phosphatase 2, catalytic subunit, beta isozyme                               |
| 1.5 | 208073_x_at  | D | TTC3                       | tetratricopeptide repeat domain 3                                                    |
| 1.5 | 207935_s_at  |   | KRT13                      | keratin 13                                                                           |
| 1.5 | 214345_at    |   | EDIL3                      | EGF-like repeats and discoidin I-like domains 3                                      |
| 1.5 | 201210_at    | D | DDX3X                      | DEAD (Asp-Glu-Ala-Asp) box polypeptide 3, X-linked                                   |
| 1.4 | 200692_s_at  |   | HSPA9                      | heat shock 70kDa protein 9 (mortalin)                                                |
| 1.4 | 200097_s_at  |   | HNRNPK                     | heterogeneous nuclear ribonucleoprotein K                                            |
| 1.4 | 226177_at    | D | GLTP                       | glycolipid transfer protein                                                          |
| 1.4 | 223078_s_at  |   | TMOD3                      | tropomodulin 3 (ubiquitous)                                                          |
| 1.4 | 210211_s_at  |   | HSP90AA1                   | heat shock protein 90kDa alpha (cytosolic), class A member 1                         |
| 1.4 | 219121_s_at  |   | ESRP1                      | epithelial splicing regulatory protein 1                                             |
| 1.4 | 223760_s_at  |   | RAB7A                      | RAB7A, member RAS oncogene family                                                    |
| 1.4 | 211985_s_at  | D | CALM1 (includes others)    | calmodulin 1 (phosphorylase kinase, delta)                                           |

Hui L, Wick HC, Edlow AG, Cowan JM, Bianchi DJW. Global gene expression analysis of term amniotic fluid cell-free fetal RNA *Obstet Gynecol* 2013;121.

The authors provided this information as a supplement to their article.

© Copyright 2013 American College of Obstetricians and Gynecologists.

|      |              |   |                            |                                                                                          |
|------|--------------|---|----------------------------|------------------------------------------------------------------------------------------|
| 1.3  | 208113_x_at  |   | PABPC3                     | poly(A) binding protein, cytoplasmic 3                                                   |
| 1.3  | 229835_s_at  |   | SLMO2                      | slowmo homolog 2 (Drosophila)                                                            |
| 1.3  | 1567107_s_at | D | TPM4                       | tropomyosin 4                                                                            |
| 1.3  | 215157_x_at  |   | PABPC1                     | poly(A) binding protein, cytoplasmic 1                                                   |
| 1.3  | 201201_at    |   | CSTB                       | cystatin B (stefin B)                                                                    |
| 1.3  | 232082_x_at  | D | SPRR3                      | small proline-rich protein 3                                                             |
| 1.3  | 208616_s_at  |   | PTP4A2                     | protein tyrosine phosphatase type IVA, member 2                                          |
| 1.3  | 201012_at    |   | ANXA1                      | annexin A1                                                                               |
| 1.2  | 218990_s_at  | D | SPRR3                      | small proline-rich protein 3                                                             |
| 1.2  | 200748_s_at  |   | FTH1 (includes EG:14319)   | ferritin, heavy polypeptide 1                                                            |
| -1.1 | 208834_x_at  | D | RPL23A                     | ribosomal protein L23a                                                                   |
| -1.1 | 208825_x_at  | D | RPL23A                     | ribosomal protein L23a                                                                   |
| -1.1 | 208929_x_at  | D | RPL13                      | ribosomal protein L13                                                                    |
| -1.1 | 213084_x_at  | D | RPL23A                     | ribosomal protein L23a                                                                   |
| -1.1 | 212734_x_at  | D | RPL13                      | ribosomal protein L13                                                                    |
| -1.1 | 219762_s_at  |   | RPL36                      | ribosomal protein L36                                                                    |
| -1.1 | 200763_s_at  |   | RPLP1                      | ribosomal protein, large, P1                                                             |
| -1.2 | 217733_s_at  |   | TMSB10/TMSB4X              | thymosin beta 4, X-linked                                                                |
| -1.2 | 221700_s_at  |   | UBA52                      | ubiquitin A-52 residue ribosomal protein fusion product 1                                |
| -1.2 | 200809_x_at  | D | RPL12                      | ribosomal protein L12                                                                    |
| -1.2 | 211720_x_at  | D | RPLP0                      | ribosomal protein, large, P0                                                             |
| -1.2 | 200640_at    | D | YWHAZ                      | tyrosine 3-monooxygenase/tryptophan 5-monooxygenase activation protein, zeta polypeptide |
| -1.2 | 212044_s_at  | D | RPL27A                     | ribosomal protein L27a                                                                   |
| -1.2 | 200926_at    |   | RPS23                      | ribosomal protein S23                                                                    |
| -1.2 | 200088_x_at  | D | RPL12                      | ribosomal protein L12                                                                    |
| -1.2 | 203034_s_at  | D | RPL27A                     | ribosomal protein L27a                                                                   |
| -1.2 | 214042_s_at  |   | RPL22                      | ribosomal protein L22                                                                    |
| -1.2 | 201033_x_at  | D | RPLP0                      | ribosomal protein, large, P0                                                             |
| -1.2 | 200022_at    | D | RPL18                      | ribosomal protein L18                                                                    |
| -1.3 | 200645_at    |   | GABARAP                    | GABA(A) receptor-associated protein                                                      |
| -1.3 | 203107_x_at  | D | RPS2                       | ribosomal protein S2                                                                     |
| -1.3 | 211972_x_at  | D | RPLP0                      | ribosomal protein, large, P0                                                             |
| -1.3 | 208856_x_at  | D | RPLP0                      | ribosomal protein, large, P0                                                             |
| -1.3 | 200057_s_at  |   | NONO                       | non-POU domain containing, octamer-binding                                               |
| -1.3 | 200872_at    |   | S100A10                    | S100 calcium binding protein A10                                                         |
| -1.3 | 212578_x_at  | D | RPS17/RPS17L               | ribosomal protein S17                                                                    |
| -1.3 | 200639_s_at  | D | YWHAZ                      | tyrosine 3-monooxygenase/tryptophan 5-monooxygenase activation protein, zeta polypeptide |
| -1.3 | 211487_x_at  | D | RPS17/RPS17L               | ribosomal protein S17                                                                    |
| -1.3 | 225065_x_at  |   | C17orf76-AS1               | C17orf76 antisense RNA 1 (non-protein coding)                                            |
| -1.3 | 1563431_x_at | D | CALM1 (includes others)    | calmodulin 1 (phosphorylase kinase, delta)                                               |
| -1.3 | 228993_s_at  |   | BBIP1                      | BBSome interacting protein 1                                                             |
| -1.3 | 200823_x_at  | D | RPL29 (includes EG:367874) | ribosomal protein L29                                                                    |
| -1.3 | 234225_at    | D | KIFC1                      | kinesin family member C1                                                                 |
| -1.4 | 218213_s_at  |   | C11orf10                   | chromosome 11 open reading frame 10                                                      |

Hui L, Wick HC, Edlow AG, Cowan JM, Bianchi DJW. Global gene expression analysis of term amniotic fluid cell-free fetal RNA *Obstet Gynecol* 2013;121.

The authors provided this information as a supplement to their article.

© Copyright 2013 American College of Obstetricians and Gynecologists.



|      |              |   |                            |                                                                                 |
|------|--------------|---|----------------------------|---------------------------------------------------------------------------------|
| -1.4 | 200093_s_at  | D | HINT1                      | histidine triad nucleotide binding protein 1                                    |
| -1.4 | 200010_at    |   | RPL11                      | ribosomal protein L11                                                           |
| -1.4 | 200936_at    |   | RPL8                       | ribosomal protein L8                                                            |
| -1.4 | 213969_x_at  | D | RPL29 (includes EG:367874) | ribosomal protein L29                                                           |
| -1.4 | 210811_s_at  |   | DDX49                      | DEAD (Asp-Glu-Ala-Asp) box polypeptide 49                                       |
| -1.4 | 225038_s_at  |   | SURF6                      | surfeit 6                                                                       |
| -1.4 | 200844_s_at  |   | PRDX6                      | peroxiredoxin 6                                                                 |
| -1.4 | 212433_x_at  | D | RPS2                       | ribosomal protein S2                                                            |
| -1.4 | 218762_at    |   | ZNF574                     | zinc finger protein 574                                                         |
| -1.4 | 225629_s_at  |   | ZBTB4                      | zinc finger and BTB domain containing 4                                         |
| -1.4 | 208730_x_at  |   | RAB2A                      | RAB2A, member RAS oncogene family                                               |
| -1.4 | 200834_s_at  |   | RPS21                      | ribosomal protein S21                                                           |
| -1.4 | 215452_x_at  |   | SUMO4                      | SMT3 suppressor of mif two 3 homolog 4 (S. cerevisiae)                          |
| -1.4 | 241350_at    |   | FBXL22                     | F-box and leucine-rich repeat protein 22                                        |
| -1.4 | 201665_x_at  | D | RPS17/RPS17L               | ribosomal protein S17                                                           |
| -1.4 | 211611_s_at  | D | TNXB                       | tenascin XB                                                                     |
| -1.4 | 45526_g_at   | D | NAA60                      | N(alpha)-acetyltransferase 60, NatF catalytic subunit                           |
| -1.4 | 201224_s_at  |   | SRRM1                      | serine/arginine repetitive matrix 1                                             |
| -1.4 | 216383_at    |   | RPL18A                     | ribosomal protein L18a                                                          |
| -1.4 | 207707_s_at  |   | SEC13                      | SEC13 homolog (S. cerevisiae)                                                   |
| -1.5 | 210183_x_at  |   | PNN                        | pinin, desmosome associated protein                                             |
| -1.5 | 1555483_x_at | D | FBLIM1                     | filamin binding LIM protein 1                                                   |
| -1.5 | 200023_s_at  |   | EIF3F                      | eukaryotic translation initiation factor 3, subunit F                           |
| -1.5 | 200929_at    |   | TMED10                     | transmembrane emp24-like trafficking protein 10 (yeast)                         |
| -1.5 | 209154_at    |   | TAX1BP3                    | Tax1 (human T-cell leukemia virus type I) binding protein 3                     |
| -1.5 | 242621_at    |   | ZNF498                     | zinc finger protein 498                                                         |
| -1.5 | 208764_s_at  |   | ATP5G2                     | ATP synthase, H+ transporting, mitochondrial Fo complex, subunit C2 (subunit 9) |
| -1.5 | 200818_at    |   | ATP5O                      | ATP synthase, H+ transporting, mitochondrial F1 complex, O subunit              |
| -1.5 | 204326_x_at  | D | MT1X                       | metallothionein 1X                                                              |
| -1.5 | 201245_s_at  |   | OTUB1                      | OTU domain, ubiquitin aldehyde binding 1                                        |
| -1.5 | 207721_x_at  | D | HINT1                      | histidine triad nucleotide binding protein 1                                    |
| -1.5 | 210466_s_at  |   | SERBP1                     | SERPINE1 mRNA binding protein 1                                                 |
| -1.5 | 201411_s_at  |   | PLEKHB2                    | pleckstrin homology domain containing, family B (evectins) member 2             |
| -1.5 | 238683_at    |   | ZNF524                     | zinc finger protein 524                                                         |
| -1.5 | 201336_at    |   | VAMP3                      | vesicle-associated membrane protein 3 (cellubrevin)                             |
| -1.5 | 208626_s_at  |   | VAT1                       | vesicle amine transport protein 1 homolog (T. californica)                      |
| -1.5 | 217144_at    |   | UBB                        | ubiquitin B                                                                     |
| -1.5 | 200009_at    |   | GDI2                       | GDP dissociation inhibitor 2                                                    |
| -1.5 | 222836_at    |   | NAA15                      | N(alpha)-acetyltransferase 15, NatA auxiliary subunit                           |
| -1.5 | 224948_at    |   | MRPS24                     | mitochondrial ribosomal protein S24                                             |
| -1.5 | 203926_x_at  |   | ATP5D                      | ATP synthase, H+ transporting, mitochondrial F1 complex, delta subunit          |

Hui L, Wick HC, Edlow AG, Cowan JM, Bianchi DJW. Global gene expression analysis of term amniotic fluid cell-free fetal RNA *Obstet Gynecol* 2013;121.

The authors provided this information as a supplement to their article.

© Copyright 2013 American College of Obstetricians and Gynecologists.

|      |             |   |                            |                                                                              |
|------|-------------|---|----------------------------|------------------------------------------------------------------------------|
| -1.5 | 215096_s_at |   | ESD                        | esterase D                                                                   |
| -1.5 | 216210_x_at |   | TRIOBP                     | TRIO and F-actin binding protein                                             |
| -1.6 | 231211_s_at |   | YIF1B                      | Yip1 interacting factor homolog B (S. cerevisiae)                            |
| -1.6 | 201757_at   |   | RPL10                      | ribosomal protein L10                                                        |
| -1.6 | 217466_x_at | D | RPS2                       | ribosomal protein S2                                                         |
| -1.6 | 212626_x_at | D | HNRNPC                     | heterogeneous nuclear ribonucleoprotein C (C1/C2)                            |
| -1.6 | 208517_x_at | D | BTF3                       | basic transcription factor 3                                                 |
| -1.6 | 211939_x_at | D | BTF3                       | basic transcription factor 3                                                 |
| -1.6 | 200852_x_at |   | GNB2                       | guanine nucleotide binding protein (G protein), beta polypeptide 2           |
| -1.6 | 204021_s_at | D | PURA                       | purine-rich element binding protein A                                        |
| -1.6 | 217736_s_at |   | EIF2AK1                    | eukaryotic translation initiation factor 2-alpha kinase 1                    |
| -1.6 | 222297_x_at | D | RPL18                      | ribosomal protein L18                                                        |
| -1.6 | 216570_x_at | D | RPL29 (includes EG:367874) | ribosomal protein L29                                                        |
| -1.6 | 210734_x_at | D | MAX                        | MYC associated factor X                                                      |
| -1.6 | 213384_x_at |   | PLCB3                      | phospholipase C, beta 3 (phosphatidylinositol-specific)                      |
| -1.6 | 225636_at   |   | STAT2                      | signal transducer and activator of transcription 2, 113kDa                   |
| -1.6 | 202244_at   |   | PSMB4                      | proteasome (prosome, macropain) subunit, beta type, 4                        |
| -1.6 | 214288_s_at |   | PSMB1                      | proteasome (prosome, macropain) subunit, beta type, 1                        |
| -1.6 | 225547_at   |   | SNHG6                      | small nucleolar RNA host gene 6 (non-protein coding)                         |
| -1.6 | 201253_s_at |   | CDIPT                      | CDP-diacylglycerol--inositol 3-phosphatidyltransferase                       |
| -1.6 | 200075_s_at |   | GUK1                       | guanylate kinase 1                                                           |
| -1.6 | 202785_at   |   | NDUFA7                     | NADH dehydrogenase (ubiquinone) 1 alpha subcomplex, 7, 14.5kDa               |
| -1.6 | 230801_at   |   | RPRD1B                     | regulation of nuclear pre-mRNA domain containing 1B                          |
| -1.6 | 213809_x_at |   | TCF3                       | transcription factor 3 (E2A immunoglobulin enhancer binding factors E12/E47) |
| -1.6 | 217926_at   |   | C19orf53                   | chromosome 19 open reading frame 53                                          |
| -1.6 | 219657_s_at |   | KLF3                       | Kruppel-like factor 3 (basic)                                                |
| -1.6 | 234071_at   |   | DEPTOR                     | DEP domain containing MTOR-interacting protein                               |
| -1.6 | 208967_s_at |   | AK2                        | adenylate kinase 2                                                           |
| -1.6 | 200895_s_at |   | FKBP4                      | FK506 binding protein 4, 59kDa                                               |
| -1.6 | 224752_at   |   | C7orf73                    | chromosome 7 open reading frame 73                                           |
| -1.6 | 214167_s_at | D | RPLP0                      | ribosomal protein, large, P0                                                 |
| -1.6 | 203316_s_at |   | SNRPE                      | small nuclear ribonucleoprotein polypeptide E                                |
| -1.6 | 209549_s_at |   | DGUOK                      | deoxyguanosine kinase                                                        |
| -1.6 | 215923_s_at |   | PSD4                       | pleckstrin and Sec7 domain containing 4                                      |
| -1.6 | 213806_at   | D | PURA                       | purine-rich element binding protein A                                        |
| -1.6 | 90610_at    |   | LRCH4                      | leucine-rich repeats and calponin homology (CH) domain containing 4          |
| -1.6 | 201064_s_at |   | PABPC4                     | poly(A) binding protein, cytoplasmic 4 (inducible form)                      |

Hui L, Wick HC, Edlow AG, Cowan JM, Bianchi DJW. Global gene expression analysis of term amniotic fluid cell-free fetal RNA *Obstet Gynecol* 2013;121.

The authors provided this information as a supplement to their article.

© Copyright 2013 American College of Obstetricians and Gynecologists.

|      |             |   |                          |                                                                  |
|------|-------------|---|--------------------------|------------------------------------------------------------------|
| -1.7 | 203206_at   |   | FAM53B                   | family with sequence similarity 53, member B                     |
| -1.7 | 214737_x_at | D | HNRNPC                   | heterogeneous nuclear ribonucleoprotein C (C1/C2)                |
| -1.7 | 210633_x_at | D | KRT10                    | keratin 10                                                       |
| -1.7 | 232888_at   |   | ISM1                     | isthmin 1 homolog (zebrafish)                                    |
| -1.7 | 209185_s_at |   | IRS2                     | insulin receptor substrate 2                                     |
| -1.7 | 212303_x_at |   | KHSRP                    | KH-type splicing regulatory protein                              |
| -1.7 | 33322_i_at  | D | SFN                      | stratifin                                                        |
| -1.7 | 229163_at   |   | CAMK2N1                  | calcium/calmodulin-dependent protein kinase II inhibitor 1       |
| -1.7 | 228053_s_at |   | TOMM5                    | translocase of outer mitochondrial membrane 5 homolog (yeast)    |
| -1.7 | 200621_at   |   | CSRP1                    | cysteine and glycine-rich protein 1                              |
| -1.7 | 224895_at   |   | YAP1 (includes EG:10413) | Yes-associated protein 1                                         |
| -1.7 | 231209_at   |   | EXOC3L4                  | exocyst complex component 3-like 4                               |
| -1.7 | 202117_at   |   | ARHGAP1                  | Rho GTPase activating protein 1                                  |
| -1.7 | 214864_s_at |   | GRHPR                    | glyoxylate reductase/hydroxypyruvate reductase                   |
| -1.7 | 203166_at   |   | CFDP1                    | craniofacial development protein 1                               |
| -1.7 | 228690_s_at |   | NDUFA11                  | NADH dehydrogenase (ubiquinone) 1 alpha subcomplex, 11, 14.7kDa  |
| -1.7 | 200948_at   |   | MLF2                     | myeloid leukemia factor 2                                        |
| -1.7 | 218661_at   | D | NAA60                    | N(alpha)-acetyltransferase 60, NatF catalytic subunit            |
| -1.7 | 227207_x_at |   | ZNF213                   | zinc finger protein 213                                          |
| -1.7 | 229237_s_at |   | FOXN3                    | forkhead box N3                                                  |
| -1.7 | 220597_s_at |   | ARL6IP4                  | ADP-ribosylation-like factor 6 interacting protein 4             |
| -1.7 | 231271_x_at |   | NMRAL1                   | NmrA-like family domain containing 1                             |
| -1.7 | 201305_x_at | D | ANP32B                   | acidic (leucine-rich) nuclear phosphoprotein 32 family, member B |
| -1.7 | 200822_x_at |   | TPI1                     | triosephosphate isomerase 1                                      |
| -1.7 | 200925_at   |   | COX6A1                   | cytochrome c oxidase subunit VIa polypeptide 1                   |
| -1.7 | 229365_at   |   | PPP1R3F                  | protein phosphatase 1, regulatory subunit 3F                     |
| -1.7 | 214315_x_at |   | CALR                     | calreticulin                                                     |
| -1.7 | 208817_at   | D | COMT                     | catechol-O-methyltransferase                                     |
| -1.7 | 228594_at   |   | NADKD1                   | NAD kinase domain containing 1                                   |
| -1.7 | 210269_s_at |   | AKAP17A                  | A kinase (PRKA) anchor protein 17A                               |
| -1.7 | 222138_s_at |   | WDR13                    | WD repeat domain 13                                              |
| -1.7 | 208581_x_at | D | MT1X                     | metallothionein 1X                                               |
| -1.7 | 39548_at    |   | NPAS2                    | neuronal PAS domain protein 2                                    |
| -1.7 | 208711_s_at |   | CCND1                    | cyclin D1                                                        |
| -1.7 | 212185_x_at |   | MT2A                     | metallothionein 2A                                               |
| -1.7 | 221964_at   |   | TULP3                    | tubby like protein 3                                             |
| -1.7 | 217784_at   |   | YKT6                     | YKT6 v-SNARE homolog (S. cerevisiae)                             |
| -1.7 | 200932_s_at |   | DCTN2                    | dynactin 2 (p50)                                                 |
| -1.7 | 229269_x_at | D | SSBP4                    | single stranded DNA binding protein 4                            |
| -1.7 | 223003_at   |   | C19orf43                 | chromosome 19 open reading frame 43                              |
| -1.7 | 219513_s_at |   | SH2D3A                   | SH2 domain containing 3A                                         |
| -1.7 | 201227_s_at |   | NDUFB8                   | NADH dehydrogenase (ubiquinone) 1 beta subcomplex, 8, 19kDa      |
| -1.7 | 233971_at   |   | FAM166A                  | family with sequence similarity 166, member A                    |

Hui L, Wick HC, Edlow AG, Cowan JM, Bianchi DJW. Global gene expression analysis of term amniotic fluid cell-free fetal RNA *Obstet Gynecol* 2013;121.

The authors provided this information as a supplement to their article.

© Copyright 2013 American College of Obstetricians and Gynecologists.

|      |             |   |                                |                                                                               |
|------|-------------|---|--------------------------------|-------------------------------------------------------------------------------|
| -1.7 | 216821_at   | D | KRT8                           | keratin 8                                                                     |
| -1.7 | 208977_x_at |   | TUBB4B                         | tubulin, beta 4B class IVb                                                    |
| -1.8 | 202355_s_at | D | GTF2F1                         | general transcription factor IIF,<br>polypeptide 1, 74kDa                     |
| -1.8 | 209038_s_at | D | EHD1                           | EH-domain containing 1                                                        |
| -1.8 | 231681_x_at |   | HIST3H2A                       | histone cluster 3, H2a                                                        |
| -1.8 | 209058_at   |   | EDF1                           | endothelial differentiation-related factor 1                                  |
| -1.8 | 227308_x_at |   | LTBP3                          | latent transforming growth factor beta<br>binding protein 3                   |
| -1.8 | 202189_x_at | D | PTBP1                          | polypyrimidine tract binding protein 1                                        |
| -1.8 | 201568_at   |   | UQCRO                          | ubiquinol-cytochrome c reductase,<br>complex III subunit VII, 9.5kDa          |
| -1.8 | 224714_at   |   | MKI67IP                        | MKI67 (FHA domain) interacting nucleolar<br>phosphoprotein                    |
| -1.8 | 210876_at   |   | ANXA2P1                        | annexin A2 pseudogene 1                                                       |
| -1.8 | 233802_at   |   | FAM184B                        | family with sequence similarity 184,<br>member B                              |
| -1.8 | 200021_at   |   | CFL1                           | cofilin 1 (non-muscle)                                                        |
| -1.8 | 234002_at   |   | ABHD16B                        | abhydrolase domain containing 16B                                             |
| -1.8 | 223012_at   | D | UBXN6                          | UBX domain protein 6                                                          |
| -1.8 | 216032_s_at |   | ERGIC3                         | ERGIC and golgi 3                                                             |
| -1.8 | 218186_at   |   | RAB25                          | RAB25, member RAS oncogene family                                             |
| -1.8 | 225192_at   |   | C10orf46                       | chromosome 10 open reading frame 46                                           |
| -1.8 | 200005_at   |   | EIF3D                          | eukaryotic translation initiation factor 3,<br>subunit D                      |
| -1.8 | 227710_s_at |   | TPT1-AS1                       | TPT1 antisense RNA 1 (non-protein<br>coding)                                  |
| -1.8 | 223631_s_at |   | C19orf33                       | chromosome 19 open reading frame 33                                           |
| -1.8 | 200736_s_at |   | GPX1 (includes EG:14775)       | glutathione peroxidase 1                                                      |
| -1.8 | 225450_at   |   | AMOTL1                         | angiomin like 1                                                               |
| -1.8 | 215507_x_at |   | RAB22A                         | RAB22A, member RAS oncogene family                                            |
| -1.8 | 202169_s_at |   | AASDHPPT                       | aminoadipate-semialdehyde<br>dehydrogenase-phosphopantetheinyl<br>transferase |
| -1.8 | 204335_at   |   | CCDC94                         | coiled-coil domain containing 94                                              |
| -1.8 | 221693_s_at | D | MRPS18A                        | mitochondrial ribosomal protein S18A                                          |
| -1.8 | 204141_at   |   | TUBB2A                         | tubulin, beta 2A class IIa                                                    |
| -1.8 | 201268_at   |   | NME2                           | non-metastatic cells 2, protein (NM23B)<br>expressed in                       |
| -1.8 | 227096_at   |   | JOSD2                          | Josephin domain containing 2                                                  |
| -1.8 | 45653_at    |   | KCTD13                         | potassium channel tetramerisation domain<br>containing 13                     |
| -1.8 | 222240_s_at | D | ISYNA1                         | inositol-3-phosphate synthase 1                                               |
| -1.8 | 200622_x_at | D | CALM1 (includes others)        | calmodulin 1 (phosphorylase kinase, delta)                                    |
| -1.8 | 33323_r_at  | D | SFN                            | stratifin                                                                     |
| -1.8 | 217805_at   |   | ILF3                           | interleukin enhancer binding factor 3,<br>90kDa                               |
| -1.8 | 228251_at   | D | UBXN6                          | UBX domain protein 6                                                          |
| -1.8 | 219293_s_at |   | OLA1                           | Obg-like ATPase 1                                                             |
| -1.8 | 217780_at   |   | WDR83OS                        | WD repeat domain 83 opposite strand                                           |
| -1.8 | 208527_x_at | D | HIST2H2BE (includes<br>others) | histone cluster 2, H2be                                                       |
| -1.8 | 202513_s_at |   | PPP2R5D                        | protein phosphatase 2, regulatory subunit<br>B', delta                        |

Hui L, Wick HC, Edlow AG, Cowan JM, Bianchi DJW. Global gene expression analysis of term amniotic fluid cell-free fetal RNA *Obstet Gynecol* 2013;121.

The authors provided this information as a supplement to their article.

© Copyright 2013 American College of Obstetricians and Gynecologists.

|      |             |   |                          |                                                                                               |
|------|-------------|---|--------------------------|-----------------------------------------------------------------------------------------------|
| -1.8 | 201526_at   |   | ARF5                     | ADP-ribosylation factor 5                                                                     |
| -1.8 | 222713_s_at |   | FANCF                    | Fanconi anemia, complementation group F                                                       |
| -1.8 | 213554_s_at | D | CDV3                     | CDV3 homolog (mouse)                                                                          |
| -1.8 | 218840_s_at |   | NADSYN1                  | NAD synthetase 1                                                                              |
| -1.8 | 201845_s_at |   | RYBP                     | RING1 and YY1 binding protein                                                                 |
| -1.8 | 213986_s_at |   | C19orf6                  | chromosome 19 open reading frame 6                                                            |
| -1.8 | 218385_at   | D | MRPS18A                  | mitochondrial ribosomal protein S18A                                                          |
| -1.8 | 211275_s_at |   | GYG1                     | glycogenin 1                                                                                  |
| -1.8 | 217346_at   |   | PPIA                     | peptidylprolyl isomerase A (cyclophilin A)<br>family with sequence similarity 53,<br>member A |
| -1.8 | 236206_at   |   | FAM53A                   |                                                                                               |
| -1.8 | 215566_x_at | D | LYPLA2                   | lysophospholipase II                                                                          |
| -1.8 | 225051_at   |   | EPB41                    | erythrocyte membrane protein band 4.1<br>(elliptocytosis 1, RH-linked)                        |
| -1.9 | 201002_s_at |   | UBE2V1                   | ubiquitin-conjugating enzyme E2 variant 1                                                     |
| -1.9 | 209332_s_at | D | MAX                      | MYC associated factor X                                                                       |
| -1.9 | 201885_s_at |   | CYB5R3                   | cytochrome b5 reductase 3                                                                     |
| -1.9 | 215138_s_at | D | KAZN                     | kazrin, periplakin interacting protein                                                        |
| -1.9 | 214801_at   | D | TOR1AIP2                 | torsin A interacting protein 2                                                                |
| -1.9 | 208569_at   | D | HIST1H2AB/HIST1H2AE      | histone cluster 1, H2ae                                                                       |
| -1.9 | 207769_s_at | D | PQBP1                    | polyglutamine binding protein 1                                                               |
| -1.9 | 231045_x_at |   | C11orf31                 | chromosome 11 open reading frame 31                                                           |
| -1.9 | 201088_at   | D | KPNA2                    | karyopherin alpha 2 (RAG cohort 1,<br>importin alpha 1)                                       |
| -1.9 | 211762_s_at | D | KPNA2                    | karyopherin alpha 2 (RAG cohort 1,<br>importin alpha 1)                                       |
| -1.9 | 209595_at   |   | GTF2F2                   | general transcription factor IIF,<br>polypeptide 2, 30kDa                                     |
| -1.9 | 201541_s_at |   | ZNHIT1                   | zinc finger, HIT-type containing 1                                                            |
| -1.9 | 214629_x_at | D | RTN4 (includes EG:57142) | reticulon 4                                                                                   |
| -1.9 | 1557613_at  |   | FLJ39534                 | uncharacterized FLJ39534                                                                      |
| -1.9 | 216913_s_at |   | RRP12                    | ribosomal RNA processing 12 homolog (S.<br>cerevisiae)                                        |
| -1.9 | 202719_s_at | D | TES                      | testis derived transcript (3 LIM domains)                                                     |
| -1.9 | 224874_at   |   | POLR1D                   | polymerase (RNA) I polypeptide D, 16kDa                                                       |
| -1.9 | 217846_at   |   | QARS                     | glutamyl-tRNA synthetase                                                                      |
| -1.9 | 218279_s_at |   | HIST2H2AA3/HIST2H2AA4    | histone cluster 2, H2aa3                                                                      |
| -1.9 | 203190_at   |   | NDUFS8                   | NADH dehydrogenase (ubiquinone) Fe-S<br>protein 8, 23kDa (NADH-coenzyme Q<br>reductase)       |
| -1.9 | 239286_at   | D | CDH11                    | cadherin 11, type 2, OB-cadherin<br>(osteoblast)                                              |
| -1.9 | 225574_at   |   | RWDD4                    | RWD domain containing 4                                                                       |
| -1.9 | 201782_s_at |   | AIP                      | aryl hydrocarbon receptor interacting<br>protein                                              |
| -1.9 | 213299_at   | D | ZBTB7A                   | zinc finger and BTB domain containing 7A                                                      |
| -1.9 | 227386_s_at |   | TMEM200B                 | transmembrane protein 200B                                                                    |
| -1.9 | 200613_at   |   | AP2M1                    | adaptor-related protein complex 2, mu 1<br>subunit                                            |
| -1.9 | 219007_at   |   | NUP43                    | nucleoporin 43kDa                                                                             |
| -1.9 | 212559_at   |   | PRKAR1B                  | protein kinase, cAMP-dependent,<br>regulatory, type I, beta                                   |
| -1.9 | 225823_at   |   | C19orf70                 | chromosome 19 open reading frame 70                                                           |

Hui L, Wick HC, Edlow AG, Cowan JM, Bianchi DJW. Global gene expression analysis of term amniotic fluid cell-free fetal RNA *Obstet Gynecol* 2013;121.

The authors provided this information as a supplement to their article.

© Copyright 2013 American College of Obstetricians and Gynecologists.

|      |              |   |                            |                                                                                     |
|------|--------------|---|----------------------------|-------------------------------------------------------------------------------------|
| -1.9 | 213627_at    |   | MAGED2                     | melanoma antigen family D, 2                                                        |
| -1.9 | 203468_at    |   | CDK10                      | cyclin-dependent kinase 10                                                          |
| -1.9 | 222567_s_at  |   | MEX3C                      | mex-3 homolog C (C. elegans)                                                        |
| -1.9 | 222785_x_at  | D | C11orf1                    | chromosome 11 open reading frame 1                                                  |
| -1.9 | 226839_at    |   | NR2C2AP                    | nuclear receptor 2C2-associated protein                                             |
| -1.9 | 201527_at    |   | ATP6V1F                    | ATPase, H+ transporting, lysosomal 14kDa, V1 subunit F                              |
| -1.9 | 209571_at    |   | CIR1                       | corepressor interacting with RBPJ, 1                                                |
| -1.9 | 217844_at    |   | CTDSP1                     | CTD (carboxy-terminal domain, RNA polymerase II, polypeptide A) small phosphatase 1 |
| -1.9 | 238991_at    |   | ASB1                       | ankyrin repeat and SOCS box containing 1                                            |
| -1.9 | 218267_at    |   | CINP                       | cyclin-dependent kinase 2 interacting protein                                       |
| -1.9 | 214004_s_at  |   | VGLL4                      | vestigial like 4 (Drosophila)                                                       |
| -1.9 | 213892_s_at  |   | APRT                       | adenine phosphoribosyltransferase                                                   |
| -1.9 | 224723_x_at  |   | LOC401397                  | uncharacterized LOC401397                                                           |
| -1.9 | 200065_s_at  |   | ARF1                       | ADP-ribosylation factor 1                                                           |
| -1.9 | 217754_at    |   | DDX56                      | DEAD (Asp-Glu-Ala-Asp) box helicase 56                                              |
| -1.9 | 204990_s_at  |   | ITGB4                      | integrin, beta 4                                                                    |
| -1.9 | 211623_s_at  |   | FBL                        | fibrillarin                                                                         |
| -1.9 | 203307_at    |   | GNL1                       | guanine nucleotide binding protein-like 1                                           |
| -1.9 | 208024_s_at  |   | DGCR6                      | DiGeorge syndrome critical region gene 6                                            |
| -1.9 | 229392_s_at  | D | PIK3R2                     | phosphoinositide-3-kinase, regulatory subunit 2 (beta)                              |
| -1.9 | 209873_s_at  |   | PKP3                       | plakophilin 3                                                                       |
| -1.9 | 222998_at    |   | MAF1 (includes EG:315093)  | MAF1 homolog (S. cerevisiae)                                                        |
| -1.9 | 218038_at    |   | ATP5SL                     | ATP5S-like                                                                          |
| -1.9 | 38707_r_at   | D | E2F4                       | E2F transcription factor 4, p107/p130-binding                                       |
| -2.0 | 52741_at     |   | TRMT61A                    | tRNA methyltransferase 61 homolog A (S. cerevisiae)                                 |
| -2.0 | 216306_x_at  | D | PTBP1                      | polypyrimidine tract binding protein 1                                              |
| -2.0 | 206846_s_at  |   | HDAC6                      | histone deacetylase 6                                                               |
| -2.0 | 38703_at     | D | DNPEP                      | aspartyl aminopeptidase                                                             |
| -2.0 | 200990_at    |   | TRIM28                     | tripartite motif containing 28                                                      |
| -2.0 | 224711_at    |   | YY1                        | YY1 transcription factor                                                            |
| -2.0 | 215084_s_at  |   | LRRC42                     | leucine rich repeat containing 42                                                   |
| -2.0 | 202841_x_at  |   | OGFR                       | opioid growth factor receptor                                                       |
| -2.0 | 243062_at    |   | FLCN                       | folliculin                                                                          |
| -2.0 | 206074_s_at  | D | HMGA1                      | high mobility group AT-hook 1                                                       |
| -2.0 | 229074_at    |   | EHD4                       | EH-domain containing 4                                                              |
| -2.0 | 224468_s_at  |   | C19orf48                   | chromosome 19 open reading frame 48                                                 |
| -2.0 | 234294_x_at  |   | GATAD2A                    | GATA zinc finger domain containing 2A                                               |
| -2.0 | 211270_x_at  | D | PTBP1                      | polypyrimidine tract binding protein 1                                              |
| -2.0 | 1569986_x_at | D | TNNT3                      | troponin T type 3 (skeletal, fast)                                                  |
| -2.0 | 220526_s_at  |   | MRPL20 (includes EG:39477) | mitochondrial ribosomal protein L20                                                 |
| -2.0 | 201908_at    |   | DVL3                       | dishevelled, dsh homolog 3 (Drosophila)                                             |
| -2.0 | 214469_at    | D | HIST1H2AB/HIST1H2AE        | histone cluster 1, H2ae                                                             |
| -2.0 | 201260_s_at  |   | SYPL1                      | synaptophysin-like 1                                                                |

Hui L, Wick HC, Edlow AG, Cowan JM, Bianchi DJW. Global gene expression analysis of term amniotic fluid cell-free fetal RNA *Obstet Gynecol* 2013;121.

The authors provided this information as a supplement to their article.

© Copyright 2013 American College of Obstetricians and Gynecologists.

|      |             |   |                             |                                                                                        |
|------|-------------|---|-----------------------------|----------------------------------------------------------------------------------------|
| -2.0 | 208490_x_at | D | HIST2H2BE (includes others) | histone cluster 2, H2be                                                                |
| -2.0 | 203743_s_at |   | TDG                         | thymine-DNA glycosylase                                                                |
| -2.0 | 201882_x_at |   | B4GALT1                     | UDP-Gal:betaGlcNAc beta 1,4-galactosyltransferase, polypeptide 1                       |
| -2.0 | 220789_s_at |   | TBRG4                       | transforming growth factor beta regulator 4                                            |
| -2.0 | 208336_s_at |   | TECR                        | trans-2,3-enoyl-CoA reductase                                                          |
| -2.0 | 212010_s_at | D | CDV3                        | CDV3 homolog (mouse)                                                                   |
| -2.0 | 230699_at   | D | PGLS                        | 6-phosphogluconolactonase                                                              |
| -2.0 | 224953_at   |   | YIPF5                       | Yip1 domain family, member 5                                                           |
| -2.0 | 204608_at   |   | ASL                         | argininosuccinate lyase                                                                |
| -2.0 | 224973_at   |   | FAM46A                      | family with sequence similarity 46, member A                                           |
| -2.0 | 210968_s_at | D | RTN4 (includes EG:57142)    | reticulon 4                                                                            |
| -2.0 | 201390_s_at |   | CSNK2B                      | casein kinase 2, beta polypeptide                                                      |
| -2.0 | 227540_at   |   | EEFSEC                      | eukaryotic elongation factor, selenocysteine-tRNA-specific                             |
| -2.0 | 203524_s_at |   | MPST                        | mercaptopyruvate sulfurtransferase                                                     |
| -2.0 | 65770_at    |   | RHOT2                       | ras homolog family member T2                                                           |
| -2.0 | 206416_at   |   | ZNF205                      | zinc finger protein 205                                                                |
| -2.0 | 224830_at   |   | NUDT21                      | nudix (nucleoside diphosphate linked moiety X)-type motif 21                           |
| -2.0 | 230727_at   |   | CISD3                       | CDGSH iron sulfur domain 3                                                             |
| -2.0 | 230806_s_at |   | FAM65A                      | family with sequence similarity 65, member A                                           |
| -2.0 | 215263_at   |   | ZXDA                        | zinc finger, X-linked, duplicated A                                                    |
| -2.0 | 202720_at   | D | TES                         | testis derived transcript (3 LIM domains)                                              |
| -2.0 | 201314_at   |   | STK25                       | serine/threonine kinase 25                                                             |
| -2.0 | 215227_x_at |   | ACP1 (includes EG:11431)    | acid phosphatase 1, soluble                                                            |
| -2.0 | 218021_at   |   | DHRS4                       | dehydrogenase/reductase (SDR family) member 4                                          |
| -2.0 | 227999_at   |   | PWWP2B                      | PWWP domain containing 2B                                                              |
| -2.0 | 208466_at   |   | RAB3D                       | RAB3D, member RAS oncogene family                                                      |
| -2.0 | 203530_s_at |   | STX4                        | syntaxin 4                                                                             |
| -2.0 | 219431_at   |   | ARHGAP10                    | Rho GTPase activating protein 10                                                       |
| -2.0 | 200910_at   |   | CCT3                        | chaperonin containing TCP1, subunit 3 (gamma)                                          |
| -2.0 | 213673_x_at |   | NENF                        | neudesin neurotrophic factor                                                           |
| -2.0 | 1570065_at  |   | C22orf34                    | chromosome 22 open reading frame 34                                                    |
| -2.0 | 226639_at   |   | SFT2D3                      | SFT2 domain containing 3                                                               |
| -2.0 | 218275_at   |   | SLC25A10                    | solute carrier family 25 (mitochondrial carrier; dicarboxylate transporter), member 10 |
| -2.0 | 206600_s_at | D | SLC16A5                     | solute carrier family 16, member 5 (monocarboxylic acid transporter 6)                 |
| -2.0 | 218492_s_at |   | THAP7                       | THAP domain containing 7                                                               |
| -2.0 | 212739_s_at |   | NME4                        | non-metastatic cells 4, protein expressed in                                           |
| -2.0 | 39729_at    |   | PRDX2                       | peroxiredoxin 2                                                                        |
| -2.0 | 204045_at   |   | TCEAL1                      | transcription elongation factor A (SII)-like 1                                         |
| -2.0 | 203777_s_at |   | RPS6KB2                     | ribosomal protein S6 kinase, 70kDa, polypeptide 2                                      |

Hui L, Wick HC, Edlow AG, Cowan JM, Bianchi DJW. Global gene expression analysis of term amniotic fluid cell-free fetal RNA *Obstet Gynecol* 2013;121.

The authors provided this information as a supplement to their article.

© Copyright 2013 American College of Obstetricians and Gynecologists.

|      |              |   |                            |                                                                                         |
|------|--------------|---|----------------------------|-----------------------------------------------------------------------------------------|
| -2.0 | 44120_at     |   | ADCK2                      | aarF domain containing kinase 2                                                         |
| -2.0 | 221251_x_at  |   | INO80B                     | INO80 complex subunit B                                                                 |
| -2.1 | 228847_at    | D | EXOC3                      | exocyst complex component 3                                                             |
| -2.1 | 48531_at     | D | TNIP2                      | TNFAIP3 interacting protein 2                                                           |
| -2.1 | 1553162_x_at |   | C19orf55                   | chromosome 19 open reading frame 55                                                     |
| -2.1 | 212630_at    | D | EXOC3                      | exocyst complex component 3                                                             |
| -2.1 | 227651_at    |   | NACC1                      | nucleus accumbens associated 1, BEN and BTB (POZ) domain containing                     |
| -2.1 | 227042_at    |   | YDJC                       | YdjC homolog (bacterial)                                                                |
| -2.1 | 223031_s_at  |   | TRAF7                      | TNF receptor-associated factor 7, E3 ubiquitin protein ligase                           |
| -2.1 | 229144_at    | D | KAZN                       | kazrin, periplakin interacting protein                                                  |
| -2.1 | 224301_x_at  |   | H2AFJ                      | H2A histone family, member J                                                            |
| -2.1 | 202829_s_at  |   | VAMP7                      | vesicle-associated membrane protein 7                                                   |
| -2.1 | 227878_s_at  | D | ALKBH7                     | alkB, alkylation repair homolog 7 (E. coli)                                             |
| -2.1 | 213755_s_at  | D | SKI                        | v-ski sarcoma viral oncogene homolog (avian)                                            |
| -2.1 | 228759_at    |   | CREB3L2                    | cAMP responsive element binding protein 3-like 2                                        |
| -2.1 | 227574_at    | D | OBSL1                      | obscurin-like 1                                                                         |
| -2.1 | 202246_s_at  |   | CDK4                       | cyclin-dependent kinase 4                                                               |
| -2.1 | 202579_x_at  |   | HMGN4                      | high mobility group nucleosomal binding domain 4                                        |
| -2.1 | 223226_x_at  | D | SSBP4                      | single stranded DNA binding protein 4                                                   |
| -2.1 | 204745_x_at  |   | MT1G                       | metallothionein 1G                                                                      |
| -2.1 | 203385_at    |   | DGKA                       | diacylglycerol kinase, alpha 80kDa                                                      |
| -2.1 | 212759_s_at  |   | TCF7L2                     | transcription factor 7-like 2 (T-cell specific, HMG-box)                                |
| -2.1 | 201306_s_at  | D | ANP32B                     | acidic (leucine-rich) nuclear phosphoprotein 32 family, member B                        |
| -2.1 | 225208_s_at  |   | FAM103A1                   | family with sequence similarity 103, member A1                                          |
| -2.1 | 225495_x_at  | D | GADD45GIP1                 | growth arrest and DNA-damage-inducible, gamma interacting protein 1                     |
| -2.1 | 212874_at    | D | APOE                       | apolipoprotein E                                                                        |
| -2.1 | 224750_at    |   | RNF185                     | ring finger protein 185                                                                 |
| -2.1 | 219082_at    |   | AMDHD2                     | amidohydrolase domain containing 2                                                      |
| -2.1 | 201040_at    |   | GNAI2                      | guanine nucleotide binding protein (G protein), alpha inhibiting activity polypeptide 2 |
| -2.1 | 1556316_s_at |   | LOC284889                  | uncharacterized LOC284889                                                               |
| -2.1 | 202154_x_at  |   | TUBB3                      | tubulin, beta 3 class III                                                               |
| -2.1 | 202564_x_at  |   | ARL2                       | ADP-ribosylation factor-like 2                                                          |
| -2.1 | 212859_x_at  |   | MT1E                       | metallothionein 1E                                                                      |
| -2.1 | 202958_at    |   | PTPN9                      | protein tyrosine phosphatase, non-receptor type 9                                       |
| -2.1 | 210457_x_at  | D | HMGA1                      | high mobility group AT-hook 1                                                           |
| -2.1 | 1555201_a_at |   | RMND1                      | required for meiotic nuclear division 1 homolog (S. cerevisiae)                         |
| -2.1 | 218188_s_at  |   | TIMM13                     | translocase of inner mitochondrial membrane 13 homolog (yeast)                          |
| -2.1 | 210027_s_at  |   | APEX1                      | APEX nuclease (multifunctional DNA repair enzyme) 1                                     |
| -2.1 | 1553993_s_at |   | MED25 (includes EG:292889) | mediator complex subunit 25                                                             |
| -2.1 | 202632_at    |   | DPH1                       | DPH1 homolog (S. cerevisiae)                                                            |

Hui L, Wick HC, Edlow AG, Cowan JM, Bianchi DJW. Global gene expression analysis of term amniotic fluid cell-free fetal RNA *Obstet Gynecol* 2013;121.

The authors provided this information as a supplement to their article.

© Copyright 2013 American College of Obstetricians and Gynecologists.



|      |              |   |                             |                                                                              |
|------|--------------|---|-----------------------------|------------------------------------------------------------------------------|
| -2.1 | 1555575_a_at | D | KDELR1                      | KDEL (Lys-Asp-Glu-Leu) endoplasmic reticulum protein retention receptor 1    |
| -2.1 | 201168_x_at  | D | ARHGDI1A                    | Rho GDP dissociation inhibitor (GDI) alpha                                   |
| -2.1 | 41220_at     |   | SEPT9                       | septin 9                                                                     |
| -2.1 | 209143_s_at  |   | CLNS1A                      | chloride channel, nucleotide-sensitive, 1A                                   |
| -2.1 | 220755_s_at  | D | C6orf48                     | chromosome 6 open reading frame 48                                           |
| -2.1 | 225004_at    |   | TMEM101                     | transmembrane protein 101                                                    |
| -2.1 | 219919_s_at  |   | SSH3                        | slingshot homolog 3 (Drosophila)                                             |
| -2.1 | 1556102_x_at |   | LOC389906/LOC729162         | zinc finger protein 839 pseudogene                                           |
| -2.1 | 223017_at    |   | TXNDC12                     | thioredoxin domain containing 12 (endoplasmic reticulum)                     |
| -2.1 | 215779_s_at  | D | HIST2H2BE (includes others) | histone cluster 2, H2be                                                      |
| -2.1 | 200618_at    |   | LASP1                       | LIM and SH3 protein 1                                                        |
| -2.2 | 228306_at    |   | CNIH4                       | cornichon homolog 4 (Drosophila)                                             |
| -2.2 | 225568_at    |   | TMEM141                     | transmembrane protein 141                                                    |
| -2.2 | 217962_at    |   | NOP10 (includes EG:36135)   | NOP10 ribonucleoprotein homolog (yeast)                                      |
| -2.2 | 212236_x_at  | D | KRT17                       | keratin 17                                                                   |
| -2.2 | 201563_at    |   | SORD                        | sorbitol dehydrogenase                                                       |
| -2.2 | 222013_x_at  | D | FAM86B1 (includes others)   | family with sequence similarity 86, member B1                                |
| -2.2 | 218672_at    |   | SCNM1                       | sodium channel modifier 1                                                    |
| -2.2 | 208546_x_at  | D | HIST1H2BH/HIST1H2BO         | histone cluster 1, H2bo                                                      |
| -2.2 | 218328_at    |   | COQ4                        | coenzyme Q4 homolog ( <i>S. cerevisiae</i> )                                 |
| -2.2 | 227063_at    |   | C17orf61                    | chromosome 17 open reading frame 61                                          |
| -2.2 | 201570_at    | D | SAMM50                      | sorting and assembly machinery component 50 homolog ( <i>S. cerevisiae</i> ) |
| -2.2 | 228189_at    |   | BAG4                        | BCL2-associated athanogene 4                                                 |
| -2.2 | 221599_at    |   | C11orf67                    | chromosome 11 open reading frame 67                                          |
| -2.2 | 206461_x_at  |   | MT1H                        | metallothionein 1H                                                           |
| -2.2 | 213854_at    |   | SYNGR1                      | synaptogyrin 1                                                               |
| -2.2 | 219541_at    |   | LIME1                       | Lck interacting transmembrane adaptor 1                                      |
| -2.2 | 226710_at    |   | C8orf82                     | chromosome 8 open reading frame 82                                           |
| -2.2 | 213898_at    | D | RBFOX2                      | RNA binding protein, fox-1 homolog ( <i>C. elegans</i> ) 2                   |
| -2.2 | 1554078_s_at |   | DNAJA3                      | DnaJ (Hsp40) homolog, subfamily A, member 3                                  |
| -2.2 | 212737_at    | D | GM2A                        | GM2 ganglioside activator                                                    |
| -2.2 | 209497_s_at  |   | RBM4B                       | RNA binding motif protein 4B                                                 |
| -2.2 | 211298_s_at  |   | ALB                         | albumin                                                                      |
| -2.2 | 233917_s_at  |   | MOV10                       | Mov10, Moloney leukemia virus 10, homolog (mouse)                            |
| -2.2 | 201930_at    |   | MCM6                        | minichromosome maintenance complex component 6                               |
| -2.2 | 204173_at    |   | MYL6B                       | myosin, light chain 6B, alkali, smooth muscle and non-muscle                 |
| -2.2 | 226246_at    | D | KCTD1                       | potassium channel tetramerisation domain containing 1                        |
| -2.2 | 226938_at    |   | DCAF4                       | DDB1 and CUL4 associated factor 4                                            |
| -2.2 | 226835_s_at  | D | ZNF1-AS1                    | ZNF1 antisense RNA 1 (non-protein coding)                                    |

Hui L, Wick HC, Edlow AG, Cowan JM, Bianchi DJW. Global gene expression analysis of term amniotic fluid cell-free fetal RNA *Obstet Gynecol* 2013;121.

The authors provided this information as a supplement to their article.

© Copyright 2013 American College of Obstetricians and Gynecologists.

|      |             |   |                           |                                                                                                                  |
|------|-------------|---|---------------------------|------------------------------------------------------------------------------------------------------------------|
| -2.2 | 208659_at   |   | CLIC1                     | chloride intracellular channel 1                                                                                 |
| -2.2 | 201136_at   |   | PLP2                      | proteolipid protein 2 (colonic epithelium-enriched)                                                              |
| -2.2 | 214426_x_at |   | CHAF1A                    | chromatin assembly factor 1, subunit A (p150)                                                                    |
| -2.2 | 218225_at   |   | ECSIT                     | ECSIT homolog (Drosophila)                                                                                       |
| -2.2 | 223050_s_at |   | FBXW5                     | F-box and WD repeat domain containing 5                                                                          |
| -2.2 | 232039_at   |   | KIAA1383                  | KIAA1383                                                                                                         |
| -2.2 | 224910_at   |   | CARHSP1                   | calcium regulated heat stable protein 1, 24kDa                                                                   |
| -2.2 | 201871_s_at |   | UBXN1                     | UBX domain protein 1                                                                                             |
| -2.2 | 33760_at    | D | PEX14 (includes EG:40294) | peroxisomal biogenesis factor 14                                                                                 |
| -2.2 | 203528_at   |   | SEMA4D                    | sema domain, immunoglobulin domain (Ig), transmembrane domain (TM) and short cytoplasmic domain, (semaphorin) 4D |
| -2.2 | 201797_s_at |   | VARS                      | valyl-tRNA synthetase                                                                                            |
| -2.2 | 221495_s_at |   | TCF25                     | transcription factor 25 (basic helix-loop-helix)                                                                 |
| -2.2 | 201046_s_at |   | RAD23A                    | RAD23 homolog A ( <i>S. cerevisiae</i> )                                                                         |
| -2.2 | 201569_s_at | D | SAMM50                    | sorting and assembly machinery component 50 homolog ( <i>S. cerevisiae</i> )                                     |
| -2.2 | 243133_at   | D | TSC22D1                   | TSC22 domain family, member 1                                                                                    |
| -2.2 | 229591_at   |   | LRP5                      | low density lipoprotein receptor-related protein 5                                                               |
| -2.2 | 210879_s_at |   | RAB11FIP5                 | RAB11 family interacting protein 5 (class I)                                                                     |
| -2.2 | 212244_at   |   | POLR2M                    | polymerase (RNA) II (DNA directed) polypeptide M                                                                 |
| -2.2 | 202876_s_at |   | PBX2                      | pre-B-cell leukemia homeobox 2                                                                                   |
| -2.2 | 203266_s_at |   | MAP2K4                    | mitogen-activated protein kinase 4                                                                               |
| -2.2 | 225715_at   |   | RPTOR                     | regulatory associated protein of MTOR, complex 1                                                                 |
| -2.2 | 204992_s_at |   | PFN2                      | profilin 2                                                                                                       |
| -2.2 | 229807_s_at | D | MAZ                       | MYC-associated zinc finger protein (purine-binding transcription factor)                                         |
| -2.2 | 201892_s_at |   | IMPDH2                    | IMP (inosine 5'-monophosphate) dehydrogenase 2                                                                   |
| -2.2 | 238665_at   |   | ZNF865                    | zinc finger protein 865                                                                                          |
| -2.2 | 211433_x_at |   | FAM214B                   | family with sequence similarity 214, member B                                                                    |
| -2.2 | 204804_at   |   | TRIM21                    | tripartite motif containing 21                                                                                   |
| -2.2 | 228552_s_at | D | ISYNA1                    | inositol-3-phosphate synthase 1                                                                                  |
| -2.3 | 225948_at   |   | APOPT1                    | apoptogenic 1                                                                                                    |
| -2.3 | 228589_at   |   | BASP1                     | brain abundant, membrane attached signal protein 1                                                               |
| -2.3 | 213535_s_at |   | UBE2I                     | ubiquitin-conjugating enzyme E2I                                                                                 |
| -2.3 | 225329_at   |   | FAM195B                   | family with sequence similarity 195, member B                                                                    |
| -2.3 | 227879_at   | D | ALKBH7                    | alkB, alkylation repair homolog 7 ( <i>E. coli</i> )                                                             |
| -2.3 | 218662_s_at |   | NCAPG                     | non-SMC condensin I complex, subunit G                                                                           |
| -2.3 | 226820_at   |   | ZNF362                    | zinc finger protein 362                                                                                          |
| -2.3 | 211716_x_at | D | ARHGDI1A                  | Rho GDP dissociation inhibitor (GDI) alpha                                                                       |
| -2.3 | 212347_x_at | D | MXD4                      | MAX dimerization protein 4                                                                                       |
| -2.3 | 233734_s_at |   | OSBPL5                    | oxysterol binding protein-like 5                                                                                 |
| -2.3 | 202553_s_at |   | SYF2 (includes EG:170933) | SYF2 homolog, RNA splicing factor ( <i>S. cerevisiae</i> )                                                       |

Hui L, Wick HC, Edlow AG, Cowan JM, Bianchi DJW. Global gene expression analysis of term amniotic fluid cell-free fetal RNA *Obstet Gynecol* 2013;121.

The authors provided this information as a supplement to their article.

© Copyright 2013 American College of Obstetricians and Gynecologists.

|      |             |   |                           |                                                                            |
|------|-------------|---|---------------------------|----------------------------------------------------------------------------|
| -2.3 | 205621_at   |   | ALKBH1                    | alkB, alkylation repair homolog 1 (E. coli)                                |
| -2.3 | 207105_s_at | D | PIK3R2                    | phosphoinositide-3-kinase, regulatory subunit 2 (beta)                     |
| -2.3 | 221927_s_at |   | ABHD11                    | abhydrolase domain containing 11                                           |
| -2.3 | 217716_s_at |   | SEC61A1                   | Sec61 alpha 1 subunit (S. cerevisiae)                                      |
| -2.3 | 238574_at   |   | MCART1                    | mitochondrial carrier triple repeat 1                                      |
| -2.3 | 221539_at   |   | EIF4EBP1                  | eukaryotic translation initiation factor 4E binding protein 1              |
| -2.3 | 225890_at   |   | C20orf72                  | chromosome 20 open reading frame 72                                        |
| -2.3 | 227362_at   |   | SLC2A4RG                  | SLC2A4 regulator                                                           |
| -2.3 | 220127_s_at |   | FBXL12                    | F-box and leucine-rich repeat protein 12                                   |
| -2.3 | 234339_s_at |   | GLTSCR2                   | glioma tumor suppressor candidate region gene 2                            |
| -2.3 | 1555550_at  |   | ZACN                      | zinc activated ligand-gated ion channel                                    |
| -2.3 | 225470_at   |   | NUP35                     | nucleoporin 35kDa                                                          |
| -2.3 | 201560_at   |   | CLIC4                     | chloride intracellular channel 4                                           |
| -2.3 | 208690_s_at |   | PDLIM1                    | PDZ and LIM domain 1                                                       |
| -2.3 | 223425_at   |   | RAVER1                    | ribonucleoprotein, PTB-binding 1                                           |
| -2.3 | 221016_s_at |   | TCF7L1                    | transcription factor 7-like 1 (T-cell specific, HMG-box)                   |
| -2.3 | 217462_at   | D | C11orf9                   | chromosome 11 open reading frame 9                                         |
| -2.3 | 231538_at   | D | C11orf1                   | chromosome 11 open reading frame 1                                         |
| -2.3 | 217751_at   |   | GSTK1                     | glutathione S-transferase kappa 1                                          |
| -2.3 | 49878_at    |   | PEX16                     | peroxisomal biogenesis factor 16                                           |
| -2.3 | 208829_at   |   | TAPBP                     | TAP binding protein (tapasin)                                              |
| -2.3 | 221123_x_at | D | ZNF395                    | zinc finger protein 395                                                    |
| -2.3 | 230414_s_at |   | TMEM170A                  | transmembrane protein 170A                                                 |
| -2.3 | 242942_at   |   | SLC38A10                  | solute carrier family 38, member 10                                        |
| -2.3 | 203228_at   |   | PAFAH1B3                  | platelet-activating factor acetylhydrolase 1b, catalytic subunit 3 (29kDa) |
| -2.3 | 202590_s_at | D | PKD2                      | pyruvate dehydrogenase kinase, isozyme 2                                   |
| -2.3 | 1568613_at  |   | RSPH3                     | radial spoke 3 homolog (Chlamydomonas)                                     |
| -2.3 | 217559_at   |   | RPL10L                    | ribosomal protein L10-like                                                 |
| -2.3 | 214635_at   |   | CLDN9                     | claudin 9                                                                  |
| -2.3 | 203655_at   |   | XRCC1 (includes EG:22594) | X-ray repair complementing defective repair in Chinese hamster cells 1     |
| -2.4 | 201055_s_at |   | HNRNPA0                   | heterogeneous nuclear ribonucleoprotein A0                                 |
| -2.4 | 232706_s_at |   | TRABD                     | TraB domain containing                                                     |
| -2.4 | 226227_x_at | D | ZNFX1-AS1                 | ZNFX1 antisense RNA 1 (non-protein coding)                                 |
| -2.4 | 35820_at    | D | GM2A                      | GM2 ganglioside activator                                                  |
| -2.4 | 215573_at   | D | CAT                       | catalase                                                                   |
| -2.4 | 226538_at   |   | MAN2A1                    | mannosidase, alpha, class 2A, member 1                                     |
| -2.4 | 209124_at   |   | MYD88                     | myeloid differentiation primary response gene (88)                         |
| -2.4 | 203979_at   |   | CYP27A1                   | cytochrome P450, family 27, subfamily A, polypeptide 1                     |
| -2.4 | 202231_at   |   | EIF3M                     | eukaryotic translation initiation factor 3, subunit M                      |
| -2.4 | 205017_s_at |   | MBNL2                     | muscleblind-like splicing regulator 2                                      |
| -2.4 | 221923_s_at |   | NPM1                      | nucleophosmin (nucleolar phosphoprotein B23, numatrin)                     |
| -2.4 | 218667_at   |   | PJA1                      | praja ring finger 1, E3 ubiquitin protein ligase                           |

Hui L, Wick HC, Edlow AG, Cowan JM, Bianchi DJW. Global gene expression analysis of term amniotic fluid cell-free fetal RNA *Obstet Gynecol* 2013;121.

The authors provided this information as a supplement to their article.

© Copyright 2013 American College of Obstetricians and Gynecologists.

|      |              |   |           |                                                                           |
|------|--------------|---|-----------|---------------------------------------------------------------------------|
| -2.4 | 212203_x_at  |   | IFITM3    | interferon induced transmembrane protein 3                                |
| -2.4 | 226943_at    |   | C12orf73  | chromosome 12 open reading frame 73                                       |
| -2.4 | 200960_x_at  | D | CLTA      | clathrin, light chain A                                                   |
| -2.4 | 201705_at    |   | PSMD7     | proteasome (prosome, macropain) 26S subunit, non-ATPase, 7                |
| -2.4 | 36129_at     |   | SGSM2     | small G protein signaling modulator 2                                     |
| -2.4 | 208547_at    |   | HIST1H2BB | histone cluster 1, H2bb                                                   |
| -2.4 | 200922_at    | D | KDELR1    | KDEL (Lys-Asp-Glu-Leu) endoplasmic reticulum protein retention receptor 1 |
| -2.4 | 35626_at     |   | SGSH      | N-sulfoglucosamine sulfohydrolase                                         |
| -2.4 | 203996_s_at  |   | C21orf2   | chromosome 21 open reading frame 2                                        |
| -2.4 | 229405_at    |   | KIF7      | kinesin family member 7                                                   |
| -2.4 | 220134_x_at  | D | FAM176B   | family with sequence similarity 176, member B                             |
| -2.4 | 218487_at    |   | ALAD      | aminolevulinic acid dehydratase                                           |
| -2.4 | 228188_at    |   | FOSL2     | FOS-like antigen 2                                                        |
| -2.4 | 1555419_a_at | D | ASAH1     | N-acylsphingosine amidohydrolase (acid ceramidase) 1                      |
| -2.4 | 212356_at    |   | KHNYN     | KH and NYN domain containing                                              |
| -2.4 | 209331_s_at  | D | MAX       | MYC associated factor X                                                   |
| -2.4 | 215325_x_at  | D | C19orf26  | chromosome 19 open reading frame 26                                       |
| -2.4 | 224552_s_at  |   | KCNK4     | potassium channel, subfamily K, member 4                                  |
| -2.4 | 207727_s_at  |   | MUTYH     | mutY homolog (E. coli)                                                    |
| -2.4 | 221488_s_at  |   | CUTA      | cutA divalent cation tolerance homolog (E. coli)                          |
| -2.4 | 201272_at    |   | AKR1B1    | aldo-keto reductase family 1, member B1 (aldose reductase)                |
| -2.4 | 219224_x_at  |   | ZNF408    | zinc finger protein 408                                                   |
| -2.4 | 216736_at    |   | TM6SF2    | transmembrane 6 superfamily member 2                                      |
| -2.4 | 213789_at    | D | EBP       | emopamil binding protein (sterol isomerase)                               |
| -2.4 | 211714_x_at  | D | TUBB      | tubulin, beta class I                                                     |
| -2.4 | 1555811_at   |   | ARHGDI1B  | Rho GDP dissociation inhibitor (GDI) beta                                 |
| -2.4 | 208583_x_at  |   | HIST1H2AJ | histone cluster 1, H2aj                                                   |
| -2.4 | 1563821_at   |   | LOC170425 | uncharacterized LOC170425                                                 |
| -2.4 | 217871_s_at  |   | MIF       | macrophage migration inhibitory factor (glycosylation-inhibiting factor)  |
| -2.4 | 214527_s_at  | D | PQBP1     | polyglutamine binding protein 1                                           |
| -2.4 | 217714_x_at  |   | STMN1     | stathmin 1                                                                |
| -2.4 | 244712_at    |   | MEX3D     | mex-3 homolog D (C. elegans)                                              |
| -2.4 | 1564010_at   |   | CAST      | calpastatin                                                               |
| -2.4 | 208816_x_at  |   | ANXA2P2   | annexin A2 pseudogene 2                                                   |
| -2.4 | 218773_s_at  |   | MSRB2     | methionine sulfoxide reductase B2                                         |
| -2.4 | 203220_s_at  | D | TLE1      | transducin-like enhancer of split 1 (E(sp1) homolog, Drosophila)          |
| -2.4 | 217461_x_at  | D | BTF3      | basic transcription factor 3                                              |
| -2.4 | 213902_at    | D | ASAH1     | N-acylsphingosine amidohydrolase (acid ceramidase) 1                      |
| -2.4 | 205574_x_at  | D | BMP1      | bone morphogenetic protein 1                                              |
| -2.4 | 202452_at    |   | ZER1      | zer-1 homolog (C. elegans)                                                |
| -2.4 | 218255_s_at  |   | FBR1      | fibrosin                                                                  |
| -2.4 | 208403_x_at  | D | MAX       | MYC associated factor X                                                   |
| -2.4 | 204106_at    |   | TESK1     | testis-specific kinase 1                                                  |
| -2.4 | 225952_at    |   | FLYWCH1   | FLYWCH-type zinc finger 1                                                 |

Hui L, Wick HC, Edlow AG, Cowan JM, Bianchi DJW. Global gene expression analysis of term amniotic fluid cell-free fetal RNA *Obstet Gynecol* 2013;121.

The authors provided this information as a supplement to their article.

© Copyright 2013 American College of Obstetricians and Gynecologists.

|      |             |   |                            |                                                                   |
|------|-------------|---|----------------------------|-------------------------------------------------------------------|
| -2.4 | 218694_at   |   | ARMCX1                     | armadillo repeat containing, X-linked 1                           |
| -2.5 | 223286_at   |   | C17orf81                   | chromosome 17 open reading frame 81                               |
| -2.5 | 219388_at   |   | GRHL2                      | grainyhead-like 2 (Drosophila)                                    |
| -2.5 | 225162_at   |   | SH3D19                     | SH3 domain containing 19                                          |
| -2.5 | 222175_s_at |   | MED15                      | mediator complex subunit 15                                       |
| -2.5 | 203175_at   |   | RHOG                       | ras homolog family member G                                       |
| -2.5 | 223022_s_at |   | VTA1 (includes EG: 292640) | Vps20-associated 1 homolog (S. cerevisiae)                        |
| -2.5 | 55081_at    | D | MICALL1                    | MICAL-like 1                                                      |
| -2.5 | 213901_x_at | D | RBFOX2                     | RNA binding protein, fox-1 homolog (C. elegans) 2                 |
| -2.5 | 213088_s_at |   | DNAJC9                     | DnaJ (Hsp40) homolog, subfamily C, member 9                       |
| -2.5 | 218958_at   |   | C19orf60                   | chromosome 19 open reading frame 60                               |
| -2.5 | 203574_at   |   | NFIL3                      | nuclear factor, interleukin 3 regulated                           |
| -2.5 | 221250_s_at |   | MXD3                       | MAX dimerization protein 3                                        |
| -2.5 | 218794_s_at |   | TXNL4B                     | thioredoxin-like 4B                                               |
| -2.5 | 206539_s_at |   | CYP4F12                    | cytochrome P450, family 4, subfamily F, polypeptide 12            |
| -2.5 | 222968_at   | D | C6orf48                    | chromosome 6 open reading frame 48                                |
| -2.5 | 242290_at   |   | TACC1                      | transforming, acidic coiled-coil containing protein 1             |
| -2.5 | 201714_at   |   | TUBG1                      | tubulin, gamma 1                                                  |
| -2.5 | 203335_at   |   | PHYH                       | phytanoyl-CoA 2-hydroxylase                                       |
| -2.5 | 210125_s_at |   | BANF1                      | barrier to autointegration factor 1                               |
| -2.5 | 33132_at    | D | CPSF1                      | cleavage and polyadenylation specific factor 1, 160kDa            |
| -2.5 | 228215_at   |   | ADD3                       | adducin 3 (gamma)                                                 |
| -2.5 | 207154_at   |   | DIO3                       | deiodinase, iodothyronine, type III                               |
| -2.5 | 203503_s_at | D | PEX14 (includes EG: 40294) | peroxisomal biogenesis factor 14                                  |
| -2.5 | 215111_s_at | D | TSC22D1                    | TSC22 domain family, member 1                                     |
| -2.5 | 221947_at   | D | IL17RC                     | interleukin 17 receptor C                                         |
| -2.5 | 224710_at   | D | RAB34                      | RAB34, member RAS oncogene family                                 |
| -2.5 | 213296_at   |   | RER1                       | RER1 retention in endoplasmic reticulum 1 homolog (S. cerevisiae) |
| -2.5 | 220503_at   |   | SLC13A1                    | solute carrier family 13 (sodium/sulfate symporters), member 1    |
| -2.5 | 226078_at   |   | RPUSD1                     | RNA pseudouridylate synthase domain containing 1                  |
| -2.5 | 230145_at   |   | DUS3L                      | dihydrouridine synthase 3-like (S. cerevisiae)                    |
| -2.5 | 206117_at   | D | TPM1 (includes EG: 22003)  | tropomyosin 1 (alpha)                                             |
| -2.5 | 1552689_at  |   | CASKIN1                    | CASK interacting protein 1                                        |
| -2.5 | 205157_s_at | D | KRT17                      | keratin 17                                                        |
| -2.5 | 203411_s_at | D | LMNA                       | lamin A/C                                                         |
| -2.5 | 224814_at   |   | DPP7                       | dipeptidyl-peptidase 7                                            |
| -2.5 | 224962_at   |   | C9orf69                    | chromosome 9 open reading frame 69                                |
| -2.5 | 209008_x_at | D | KRT8                       | keratin 8                                                         |
| -2.5 | 202737_s_at |   | LSM4 (includes EG: 25804)  | LSM4 homolog, U6 small nuclear RNA associated (S. cerevisiae)     |
| -2.5 | 203405_at   |   | PSMG1                      | proteasome (prosome, macropain) assembly chaperone 1              |
| -2.5 | 201087_at   | D | PXN                        | paxillin                                                          |

Hui L, Wick HC, Edlow AG, Cowan JM, Bianchi DJW. Global gene expression analysis of term amniotic fluid cell-free fetal RNA *Obstet Gynecol* 2013;121.

The authors provided this information as a supplement to their article.

© Copyright 2013 American College of Obstetricians and Gynecologists.

|      |              |   |                           |                                                                                              |
|------|--------------|---|---------------------------|----------------------------------------------------------------------------------------------|
| -2.5 | 224473_x_at  | D | LZTS2                     | leucine zipper, putative tumor suppressor 2                                                  |
| -2.5 | 212151_at    | D | PBX1                      | pre-B-cell leukemia homeobox 1                                                               |
| -2.5 | 220562_at    |   | CYP2W1                    | cytochrome P450, family 2, subfamily W, polypeptide 1                                        |
| -2.5 | 224915_x_at  | D | ZNFX1-AS1                 | ZNFX1 antisense RNA 1 (non-protein coding)                                                   |
| -2.5 | 223216_x_at  | D | ZNF395                    | zinc finger protein 395                                                                      |
| -2.5 | 218495_at    |   | UXT                       | ubiquitously-expressed, prefoldin-like chaperone                                             |
| -2.5 | 59999_at     |   | HIF1AN                    | hypoxia inducible factor 1, alpha subunit inhibitor                                          |
| -2.5 | 201596_x_at  |   | KRT18                     | keratin 18                                                                                   |
| -2.5 | 65718_at     |   | GPR124                    | G protein-coupled receptor 124                                                               |
| -2.5 | 218847_at    |   | IGF2BP2                   | insulin-like growth factor 2 mRNA binding protein 2                                          |
| -2.5 | 218387_s_at  | D | PGLS                      | 6-phosphogluconolactonase                                                                    |
| -2.5 | 223123_s_at  |   | PITHD1                    | PITH (C-terminal proteasome-interacting domain of thioredoxin-like) domain containing 1      |
| -2.5 | 216295_s_at  | D | CLTA                      | clathrin, light chain A                                                                      |
| -2.5 | 201897_s_at  |   | CKS1B                     | CDC28 protein kinase regulatory subunit 1B                                                   |
| -2.5 | 224066_s_at  |   | HIPK2                     | homeodomain interacting protein kinase 2                                                     |
| -2.5 | 230031_at    |   | HSPA5                     | heat shock 70kDa protein 5 (glucose-regulated protein, 78kDa)                                |
| -2.6 | 218037_at    |   | FAM134A                   | family with sequence similarity 134, member A                                                |
| -2.6 | 223432_at    |   | OSBP2                     | oxysterol binding protein 2                                                                  |
| -2.6 | 214080_x_at  |   | PRKCSH                    | protein kinase C substrate 80K-H                                                             |
| -2.6 | 206116_s_at  | D | TPM1 (includes EG:22003)  | tropomyosin 1 (alpha)                                                                        |
| -2.6 | 219207_at    |   | EDC3 (includes EG:315708) | enhancer of mRNA decapping 3 homolog (S. cerevisiae)                                         |
| -2.6 | 213928_s_at  | D | AGFG1                     | ArfGAP with FG repeats 1                                                                     |
| -2.6 | 208423_s_at  | D | MSR1 (includes EG:20288)  | macrophage scavenger receptor 1                                                              |
| -2.6 | 205286_at    |   | TFAP2C                    | transcription factor AP-2 gamma (activating enhancer binding protein 2 gamma)                |
| -2.6 | 211009_s_at  |   | ZNF271                    | zinc finger protein 271                                                                      |
| -2.6 | 1555751_a_at | D | GEMIN7                    | gem (nuclear organelle) associated protein 7                                                 |
| -2.6 | 225136_at    | D | PLEKHA2                   | pleckstrin homology domain containing, family A (phosphoinositide binding specific) member 2 |
| -2.6 | 215972_at    |   | PART1                     | prostate androgen-regulated transcript 1 (non-protein coding)                                |
| -2.6 | 211509_s_at  | D | RTN4 (includes EG:57142)  | reticulon 4                                                                                  |
| -2.6 | 223368_s_at  |   | METTL11A                  | methyltransferase like 11A                                                                   |
| -2.6 | 220587_s_at  |   | MLST8                     | MTOR associated protein, LST8 homolog (S. cerevisiae)                                        |
| -2.6 | 202382_s_at  |   | GNPDA1                    | glucosamine-6-phosphate deaminase 1                                                          |
| -2.6 | 219948_x_at  |   | UGT2A3                    | UDP glucuronosyltransferase 2 family, polypeptide A3                                         |
| -2.6 | 216442_x_at  | D | FN1                       | fibronectin 1                                                                                |
| -2.6 | 219798_s_at  |   | MEPCE                     | methylphosphate capping enzyme                                                               |

Hui L, Wick HC, Edlow AG, Cowan JM, Bianchi DJW. Global gene expression analysis of term amniotic fluid cell-free fetal RNA *Obstet Gynecol* 2013;121.

The authors provided this information as a supplement to their article.

© Copyright 2013 American College of Obstetricians and Gynecologists.

|      |              |   |              |                                                                                     |
|------|--------------|---|--------------|-------------------------------------------------------------------------------------|
| -2.6 | 220831_at    |   | GCNT4        | glucosaminyl (N-acetyl) transferase 4, core 2                                       |
| -2.6 | 203467_at    |   | PMM1         | phosphomannomutase 1                                                                |
| -2.6 | 201465_s_at  | D | JUN          | jun proto-oncogene                                                                  |
| -2.6 | 210106_at    |   | RDH5         | retinol dehydrogenase 5 (11-cis/9-cis)                                              |
| -2.6 | 223153_x_at  |   | TMUB1        | transmembrane and ubiquitin-like domain containing 1                                |
| -2.6 | 202292_x_at  | D | LYPLA2       | lysophospholipase II                                                                |
| -2.6 | 228874_at    |   | PHLDB3       | pleckstrin homology-like domain, family B, member 3                                 |
| -2.6 | 204795_at    |   | PRR3         | proline rich 3                                                                      |
| -2.6 | 52005_at     |   | WIZ          | widely interspaced zinc finger motifs family with sequence similarity 189, member B |
| -2.6 | 203550_s_at  |   | FAM189B      |                                                                                     |
| -2.6 | 218443_s_at  |   | DAZAP1       | DAZ associated protein 1                                                            |
| -2.6 | 219708_at    |   | NT5M         | 5',3'-nucleotidase, mitochondrial                                                   |
| -2.6 | 1558211_s_at | D | SRC          | v-src sarcoma (Schmidt-Ruppin A-2) viral oncogene homolog (avian)                   |
| -2.6 | 229592_at    |   | LOC100507501 | uncharacterized LOC100507501                                                        |
| -2.6 | 222847_s_at  |   | EGLN3        | egl nine homolog 3 (C. elegans)                                                     |
| -2.6 | 225408_at    |   | MBP          | myelin basic protein                                                                |
| -2.6 | 214246_x_at  | D | MINK1        | misshapen-like kinase 1                                                             |
| -2.6 | 1555630_a_at | D | RAB34        | RAB34, member RAS oncogene family                                                   |
| -2.6 | 222475_at    |   | SAP30BP      | SAP30 binding protein                                                               |
| -2.6 | 223332_x_at  |   | RNF126       | ring finger protein 126                                                             |
| -2.6 | 231553_s_at  |   | MICAL3       | microtubule associated monooxygenase, calponin and LIM domain containing 3          |
| -2.6 | 209026_x_at  | D | TUBB         | tubulin, beta class I                                                               |
| -2.6 | 1560698_a_at |   | LOC283392    | uncharacterized LOC283392                                                           |
| -2.6 | 1569146_s_at |   | SOGA3        | SOGA family member 3                                                                |
| -2.6 | 203538_at    |   | CAMLG        | calcium modulating ligand                                                           |
| -2.6 | 234344_at    |   | LOC100288675 | uncharacterized LOC100288675                                                        |
| -2.6 | 208258_s_at  |   | GAS2L1       | growth arrest-specific 2 like 1                                                     |
| -2.6 | 210495_x_at  | D | FN1          | fibronectin 1                                                                       |
| -2.7 | 202122_s_at  |   | PLIN3        | perilipin 3                                                                         |
| -2.7 | 222862_s_at  |   | AK5          | adenylate kinase 5                                                                  |
| -2.7 | 206020_at    | D | SOCS6        | suppressor of cytokine signaling 6                                                  |
| -2.7 | 202424_at    |   | MAP2K2       | mitogen-activated protein kinase kinase 2                                           |
| -2.7 | 211719_x_at  | D | FN1          | fibronectin 1                                                                       |
| -2.7 | 232190_x_at  |   | LOC100133445 | uncharacterized LOC100133445                                                        |
| -2.7 | 226005_at    |   | UBE2G1       | ubiquitin-conjugating enzyme E2G 1                                                  |
| -2.7 | 214105_at    |   | SOCS3        | suppressor of cytokine signaling 3                                                  |
| -2.7 | 202356_s_at  | D | GTF2F1       | general transcription factor IIF, polypeptide 1, 74kDa                              |
| -2.7 | 212876_at    |   | B4GALT4      | UDP-Gal:betaGlcNAc beta 1,4-galactosyltransferase, polypeptide 4                    |
| -2.7 | 202371_at    |   | TCEAL4       | transcription elongation factor A (SII)-like 4                                      |
| -2.7 | 202701_at    | D | BMP1         | bone morphogenetic protein 1                                                        |
| -2.7 | 212086_x_at  | D | LMNA         | lamin A/C                                                                           |
| -2.7 | 201751_at    |   | JOSD1        | Josephin domain containing 1                                                        |
| -2.7 | 225398_at    |   | RPUSD4       | RNA pseudouridylate synthase domain containing 4                                    |
| -2.7 | 224790_at    | D | ASAP1        | ArfGAP with SH3 domain, ankyrin repeat and PH domain 1                              |

Hui L, Wick HC, Edlow AG, Cowan JM, Bianchi DJW. Global gene expression analysis of term amniotic fluid cell-free fetal RNA *Obstet Gynecol* 2013;121.

The authors provided this information as a supplement to their article.

© Copyright 2013 American College of Obstetricians and Gynecologists.

|      |              |   |                             |                                                           |
|------|--------------|---|-----------------------------|-----------------------------------------------------------|
| -2.7 | 200623_s_at  | D | CALM1 (includes others)     | calmodulin 1 (phosphorylase kinase, delta)                |
| -2.7 | 223042_s_at  |   | FUNDC2                      | FUN14 domain containing 2                                 |
| -2.7 | 35617_at     |   | MAPK7                       | mitogen-activated protein kinase 7                        |
| -2.7 | 205424_at    |   | TBKBP1                      | TBK1 binding protein 1                                    |
| -2.7 | 216911_s_at  | D | HIC2                        | hypermethylated in cancer 2                               |
| -2.7 | 230938_x_at  | D | ATF5                        | activating transcription factor 5                         |
| -2.7 | 221779_at    | D | MICALL1                     | MICAL-like 1                                              |
| -2.7 | 213143_at    |   | C2orf72                     | chromosome 2 open reading frame 72                        |
| -2.7 | 1552546_a_at |   | LETM2                       | leucine zipper-EF-hand containing transmembrane protein 2 |
| -2.7 | 239837_at    | D | ADAM11                      | ADAM metallopeptidase domain 11                           |
| -2.7 | 212965_at    | D | HIC2                        | hypermethylated in cancer 2                               |
| -2.7 | 227025_at    |   | PPHLN1                      | periphilin 1                                              |
| -2.7 | 209637_s_at  |   | RGS12                       | regulator of G-protein signaling 12                       |
| -2.7 | 218679_s_at  |   | VPS28 (includes EG:300052)  | vacuolar protein sorting 28 homolog (S. cerevisiae)       |
| -2.7 | 221325_at    |   | KCNK13                      | potassium channel, subfamily K, member 13                 |
| -2.7 | 221261_x_at  |   | MAGED4/MAGED4B              | melanoma antigen family D, 4B                             |
| -2.7 | 201470_at    | D | GSTO1                       | glutathione S-transferase omega 1                         |
| -2.7 | 216338_s_at  |   | YIPF3                       | Yip1 domain family, member 3                              |
| -2.7 | 235037_at    |   | TMEM41A                     | transmembrane protein 41A                                 |
| -2.7 | 212320_at    | D | TUBB                        | tubulin, beta class I                                     |
| -2.7 | 222216_s_at  |   | MRPL17 (includes EG:171061) | mitochondrial ribosomal protein L17                       |
| -2.7 | 219899_x_at  |   | NDOR1                       | NADPH dependent diflavin oxidoreductase 1                 |
| -2.7 | 242282_at    |   | ZFPM1                       | zinc finger protein, multitype 1                          |
| -2.7 | 202534_x_at  |   | DHFR                        | dihydrofolate reductase                                   |
| -2.8 | 218586_at    |   | C20orf20                    | chromosome 20 open reading frame 20                       |
| -2.8 | 217931_at    |   | CNPY3                       | canopy 3 homolog (zebrafish)                              |
| -2.8 | 211529_x_at  |   | HLA-G                       | major histocompatibility complex, class I, G              |
| -2.8 | 219165_at    |   | PDLIM2                      | PDZ and LIM domain 2 (mystique)                           |
| -2.8 | 217892_s_at  |   | LIMA1                       | LIM domain and actin binding 1                            |
| -2.8 | 231017_at    |   | STK11                       | serine/threonine kinase 11                                |
| -2.8 | 203575_at    |   | CSNK2A2                     | casein kinase 2, alpha prime polypeptide                  |
| -2.8 | 224708_at    | D | KIAA2013                    | KIAA2013                                                  |
| -2.8 | 225755_at    |   | KLHDC8B                     | kelch domain containing 8B                                |
| -2.8 | 1565737_at   |   | SCTR                        | secretin receptor                                         |
| -2.8 | 200885_at    |   | RHOC                        | ras homolog family member C                               |
| -2.8 | 219379_x_at  | D | ZNF358                      | zinc finger protein 358                                   |
| -2.8 | 209219_at    |   | RDBP                        | RD RNA binding protein                                    |
| -2.8 | 219402_s_at  |   | DERL1                       | Der1-like domain family, member 1                         |
| -2.8 | 203246_s_at  |   | NPRL2                       | nitrogen permease regulator-like 2 (S. cerevisiae)        |
| -2.8 | 209454_s_at  |   | TEAD3                       | TEA domain family member 3                                |
| -2.8 | 219973_at    |   | ARSJ                        | arylsulfatase family, member J                            |
| -2.8 | 227240_at    | D | NGEF                        | neuronal guanine nucleotide exchange factor               |
| -2.8 | 220555_s_at  |   | PDZD7                       | PDZ domain containing 7                                   |
| -2.8 | 201264_at    |   | COPE                        | coatamer protein complex, subunit epsilon                 |

Hui L, Wick HC, Edlow AG, Cowan JM, Bianchi DJW. Global gene expression analysis of term amniotic fluid cell-free fetal RNA *Obstet Gynecol* 2013;121.

The authors provided this information as a supplement to their article.

© Copyright 2013 American College of Obstetricians and Gynecologists.



|      |             |   |                           |                                                                                 |
|------|-------------|---|---------------------------|---------------------------------------------------------------------------------|
| -2.8 | 210010_s_at |   | SLC25A1                   | solute carrier family 25 (mitochondrial carrier; citrate transporter), member 1 |
| -2.8 | 212346_s_at | D | MXD4                      | MAX dimerization protein 4                                                      |
| -2.8 | 205516_x_at |   | CIZ1                      | CDKN1A interacting zinc finger protein 1                                        |
| -2.8 | 205505_at   |   | GCNT1                     | glucosaminyl (N-acetyl) transferase 1, core 2                                   |
| -2.8 | 209241_x_at | D | MINK1                     | misshapen-like kinase 1                                                         |
| -2.8 | 225743_at   |   | RPUSD3                    | RNA pseudouridylate synthase domain containing 3                                |
| -2.8 | 209645_s_at |   | ALDH1B1                   | aldehyde dehydrogenase 1 family, member B1                                      |
| -2.8 | 209227_at   |   | TUSC3                     | tumor suppressor candidate 3                                                    |
| -2.8 | 218684_at   |   | LRRC8D                    | leucine rich repeat containing 8 family, member D                               |
| -2.8 | 221281_at   | D | SRC                       | v-src sarcoma (Schmidt-Ruppin A-2) viral oncogene homolog (avian)               |
| -2.8 | 234068_s_at |   | AP2A1                     | adaptor-related protein complex 2, alpha 1 subunit                              |
| -2.8 | 208818_s_at | D | COMT                      | catechol-O-methyltransferase                                                    |
| -2.8 | 226638_at   |   | ARHGAP23                  | Rho GTPase activating protein 23                                                |
| -2.8 | 202116_at   |   | DPF2                      | D4, zinc and double PHD fingers family 2                                        |
| -2.8 | 235252_at   | D | KSR1                      | kinase suppressor of ras 1                                                      |
| -2.8 | 207722_s_at |   | BTBD2                     | BTB (POZ) domain containing 2                                                   |
| -2.8 | 217948_at   |   | FAM127B                   | family with sequence similarity 127, member B                                   |
| -2.8 | 222029_x_at | D | PFDN6                     | prefoldin subunit 6                                                             |
| -2.8 | 224310_s_at |   | BCL11B                    | B-cell CLL/lymphoma 11B (zinc finger protein)                                   |
| -2.8 | 223294_at   |   | CXorf26                   | chromosome X open reading frame 26                                              |
| -2.8 | 206593_s_at |   | MED22 (includes EG:20933) | mediator complex subunit 22                                                     |
| -2.8 | 217389_s_at | D | ATF5                      | activating transcription factor 5                                               |
| -2.8 | 221954_at   |   | C20orf111                 | chromosome 20 open reading frame 111                                            |
| -2.8 | 202735_at   | D | EBP                       | emopamil binding protein (sterol isomerase)                                     |
| -2.8 | 206123_at   |   | LLGL1                     | lethal giant larvae homolog 1 (Drosophila)                                      |
| -2.8 | 201599_at   |   | OAT                       | ornithine aminotransferase                                                      |
| -2.8 | 204203_at   |   | CEBPG                     | CCAAT/enhancer binding protein (C/EBP), gamma                                   |
| -2.9 | 213944_x_at | D | GNA11                     | guanine nucleotide binding protein (G protein), alpha 11 (Gq class)             |
| -2.9 | 226536_at   |   | NSMCE2                    | non-SMC element 2, MMS21 homolog (S. cerevisiae)                                |
| -2.9 | 201566_x_at | D | ID2                       | inhibitor of DNA binding 2, dominant negative helix-loop-helix protein          |
| -2.9 | 224981_at   |   | TMEM219                   | transmembrane protein 219                                                       |
| -2.9 | 65086_at    | D | YIPF2                     | Yip1 domain family, member 2                                                    |
| -2.9 | 205327_s_at |   | ACVR2A                    | activin A receptor, type IIA                                                    |
| -2.9 | 212680_x_at | D | PPP1R14B                  | protein phosphatase 1, regulatory (inhibitor) subunit 14B                       |
| -2.9 | 219677_at   |   | SPSB1                     | splA/ryanodine receptor domain and SOCS box containing 1                        |
| -2.9 | 208031_s_at |   | RFX2                      | regulatory factor X, 2 (influences HLA class II expression)                     |
| -2.9 | 212464_s_at | D | FN1                       | fibronectin 1                                                                   |
| -2.9 | 207619_at   |   | HCRTR1                    | hypocretin (orexin) receptor 1                                                  |
| -2.9 | 222821_s_at | D | GEMIN7                    | gem (nuclear organelle) associated protein 7                                    |

Hui L, Wick HC, Edlow AG, Cowan JM, Bianchi DJW. Global gene expression analysis of term amniotic fluid cell-free fetal RNA *Obstet Gynecol* 2013;121.

The authors provided this information as a supplement to their article.

© Copyright 2013 American College of Obstetricians and Gynecologists.

|      |              |   |                           |                                                                                               |
|------|--------------|---|---------------------------|-----------------------------------------------------------------------------------------------|
| -2.9 | 212889_x_at  | D | GADD45GIP1                | growth arrest and DNA-damage-inducible, gamma interacting protein 1                           |
| -2.9 | 1569938_at   |   | SIRT5                     | sirtuin 5                                                                                     |
| -2.9 | 207735_at    |   | RNF125                    | ring finger protein 125, E3 ubiquitin protein ligase                                          |
| -2.9 | 218291_at    |   | LAMTOR2                   | late endosomal/lysosomal adaptor, MAPK and MTOR activator 2                                   |
| -2.9 | 234729_at    |   | PHKG1                     | phosphorylase kinase, gamma 1 (muscle)                                                        |
| -2.9 | 204691_x_at  |   | PLA2G6                    | phospholipase A2, group VI (cytosolic, calcium-independent)                                   |
| -2.9 | 217932_at    |   | MRPS7                     | mitochondrial ribosomal protein S7                                                            |
| -2.9 | 201494_at    |   | PRCP                      | prolylcarboxypeptidase (angiotensinase C)                                                     |
| -2.9 | 227590_at    |   | C22orf40                  | chromosome 22 open reading frame 40                                                           |
| -2.9 | 203063_at    | D | PPM1F                     | protein phosphatase, Mg2+/Mn2+ dependent, 1F                                                  |
| -2.9 | 1557915_s_at | D | GSTO1                     | glutathione S-transferase omega 1                                                             |
| -2.9 | 243000_at    | D | CDK6                      | cyclin-dependent kinase 6                                                                     |
| -2.9 | 202426_s_at  |   | RXRA                      | retinoid X receptor, alpha                                                                    |
| -2.9 | 216894_x_at  | D | CDKN1C                    | cyclin-dependent kinase inhibitor 1C (p57, Kip2)                                              |
| -2.9 | 204418_x_at  |   | GSTM2                     | glutathione S-transferase mu 2 (muscle)                                                       |
| -2.9 | 211737_x_at  | D | PTN                       | pleiotrophin                                                                                  |
| -2.9 | 204985_s_at  |   | TRAPPC6A                  | trafficking protein particle complex 6A                                                       |
| -2.9 | 218161_s_at  |   | CLN6                      | ceroid-lipofuscinosis, neuronal 6, late infantile, variant                                    |
| -2.9 | 201349_at    |   | SLC9A3R1                  | solute carrier family 9, subfamily A (NHE3, cation proton antiporter 3), member 3 regulator 1 |
| -2.9 | 227421_at    |   | YBEY                      | ybeY metallopeptidase (putative)                                                              |
| -2.9 | 230480_at    |   | PIWIL4                    | piwi-like 4 (Drosophila)                                                                      |
| -2.9 | 213344_s_at  | D | H2AFX                     | H2A histone family, member X                                                                  |
| -2.9 | 204306_s_at  |   | CD151                     | CD151 molecule (Raph blood group)                                                             |
| -2.9 | 205981_s_at  |   | ING2                      | inhibitor of growth family, member 2                                                          |
| -2.9 | 224670_at    |   | SYS1 (includes EG:336339) | SYS1 Golgi-localized integral membrane protein homolog ( <i>S. cerevisiae</i> )               |
| -2.9 | 212512_s_at  |   | CARM1                     | coactivator-associated arginine methyltransferase 1                                           |
| -2.9 | 226816_s_at  |   | KIAA1143                  | KIAA1143                                                                                      |
| -2.9 | 232380_at    |   | FGGY                      | FGGY carbohydrate kinase domain containing                                                    |
| -2.9 | 225655_at    |   | UHRF1                     | ubiquitin-like with PHD and ring finger domains 1                                             |
| -2.9 | 225688_s_at  |   | PHLDB2                    | pleckstrin homology-like domain, family B, member 2                                           |
| -2.9 | 218335_x_at  | D | TNIP2                     | TNFAIP3 interacting protein 2                                                                 |
| -3.0 | 231501_at    |   | LOC100507162              | uncharacterized LOC100507162                                                                  |
| -3.0 | 210445_at    |   | FABP6                     | fatty acid binding protein 6, ileal                                                           |
| -3.0 | 217226_s_at  | D | SFXN3                     | sideroflexin 3                                                                                |
| -3.0 | 1558186_s_at |   | CLLU1                     | chronic lymphocytic leukemia up-regulated 1                                                   |
| -3.0 | 206480_at    |   | LTC4S                     | leukotriene C4 synthase                                                                       |
| -3.0 | 206760_s_at  |   | FCER2                     | Fc fragment of IgE, low affinity II, receptor for (CD23)                                      |
| -3.0 | 215333_x_at  | D | GSTM1                     | glutathione S-transferase mu 1                                                                |
| -3.0 | 221799_at    |   | CHPF2                     | chondroitin polymerizing factor 2                                                             |
| -3.0 | 217270_s_at  |   | DYRK1B                    | dual-specificity tyrosine-(Y)-phosphorylation regulated kinase 1B                             |

Hui L, Wick HC, Edlow AG, Cowan JM, Bianchi DJW. Global gene expression analysis of term amniotic fluid cell-free fetal RNA *Obstet Gynecol* 2013;121.

The authors provided this information as a supplement to their article.

© Copyright 2013 American College of Obstetricians and Gynecologists.

|      |              |   |                            |                                                                                   |
|------|--------------|---|----------------------------|-----------------------------------------------------------------------------------|
| -3.0 | 224991_at    |   | CMIP                       | c-Maf inducing protein                                                            |
| -3.0 | 214174_s_at  | D | PDLIM4                     | PDZ and LIM domain 4                                                              |
| -3.0 | 205449_at    |   | SAC3D1                     | SAC3 domain containing 1                                                          |
| -3.0 | 224879_at    |   | C9orf123                   | chromosome 9 open reading frame 123                                               |
| -3.0 | 214160_at    | D | CDK6                       | cyclin-dependent kinase 6                                                         |
| -3.0 | 204550_x_at  | D | GSTM1                      | glutathione S-transferase mu 1                                                    |
| -3.0 | 224706_at    | D | KIAA2013                   | KIAA2013                                                                          |
| -3.0 | 211752_s_at  |   | NDUFS7                     | NADH dehydrogenase (ubiquinone) Fe-S protein 7, 20kDa (NADH-coenzyme Q reductase) |
| -3.0 | 202669_s_at  | D | EFNB2                      | ephrin-B2                                                                         |
| -3.0 | 49327_at     |   | SIRT3                      | sirtuin 3                                                                         |
| -3.0 | 230335_at    |   | C9orf50                    | chromosome 9 open reading frame 50                                                |
| -3.0 | 225033_at    |   | ST3GAL1                    | ST3 beta-galactoside alpha-2,3-sialyltransferase 1                                |
| -3.0 | 217891_at    |   | C16orf58                   | chromosome 16 open reading frame 58                                               |
| -3.0 | 226507_at    | D | PAK1                       | p21 protein (Cdc42/Rac)-activated kinase 1                                        |
| -3.0 | 210567_s_at  | D | SKP2 (includes EG:27401)   | S-phase kinase-associated protein 2, E3 ubiquitin protein ligase                  |
| -3.0 | 212089_at    | D | LMNA                       | lamin A/C                                                                         |
| -3.0 | 220973_s_at  |   | SHARPIN                    | SHANK-associated RH domain interactor                                             |
| -3.0 | 227263_at    |   | C8orf58                    | chromosome 8 open reading frame 58                                                |
| -3.0 | 1554475_a_at |   | C19orf47                   | chromosome 19 open reading frame 47                                               |
| -3.0 | 203221_at    | D | TLE1                       | transducin-like enhancer of split 1 (E(sp1) homolog, Drosophila)                  |
| -3.0 | 202279_at    |   | C14orf2                    | chromosome 14 open reading frame 2                                                |
| -3.0 | 219547_at    |   | COX15                      | COX15 homolog, cytochrome c oxidase assembly protein (yeast)                      |
| -3.0 | 208101_s_at  |   | URM1 (includes EG:2768949) | ubiquitin related modifier 1                                                      |
| -3.0 | 213182_x_at  | D | CDKN1C                     | cyclin-dependent kinase inhibitor 1C (p57, Kip2)                                  |
| -3.0 | 219534_x_at  | D | CDKN1C                     | cyclin-dependent kinase inhibitor 1C (p57, Kip2)                                  |
| -3.1 | 209358_at    |   | TAF11 (includes EG:309638) | TAF11 RNA polymerase II, TATA box binding protein (TBP)-associated factor, 28kDa  |
| -3.1 | 202329_at    |   | CSK                        | c-src tyrosine kinase                                                             |
| -3.1 | 213590_at    | D | SLC16A5                    | solute carrier family 16, member 5 (monocarboxylic acid transporter 6)            |
| -3.1 | 209531_at    |   | GSTZ1                      | glutathione transferase zeta 1                                                    |
| -3.1 | 238911_at    |   | STARD10                    | StAR-related lipid transfer (START) domain containing 10                          |
| -3.1 | 213926_s_at  | D | AGFG1                      | ArfGAP with FG repeats 1                                                          |
| -3.1 | 220320_at    |   | DOK3                       | docking protein 3                                                                 |
| -3.1 | 203454_s_at  |   | ATOX1                      | ATX1 antioxidant protein 1 homolog (yeast)                                        |
| -3.1 | 231981_at    | D | PRLR                       | prolactin receptor                                                                |
| -3.1 | 238090_at    |   | HGSNAT                     | heparan-alpha-glucosaminide N-acetyltransferase                                   |
| -3.1 | 222986_s_at  |   | SHISA5                     | shisa homolog 5 (Xenopus laevis)                                                  |
| -3.1 | 214462_at    | D | SOCS6                      | suppressor of cytokine signaling 6                                                |
| -3.1 | 212981_s_at  |   | FAM115A                    | family with sequence similarity 115, member A                                     |
| -3.1 | 1553512_at   |   | HOXC12                     | homeobox C12                                                                      |
| -3.1 | 204693_at    |   | CDC42EP1                   | CDC42 effector protein (Rho GTPase binding) 1                                     |

Hui L, Wick HC, Edlow AG, Cowan JM, Bianchi DJW. Global gene expression analysis of term amniotic fluid cell-free fetal RNA *Obstet Gynecol* 2013;121.

The authors provided this information as a supplement to their article.

© Copyright 2013 American College of Obstetricians and Gynecologists.

|      |              |   |                             |                                                                                         |
|------|--------------|---|-----------------------------|-----------------------------------------------------------------------------------------|
| -3.1 | 225002_s_at  |   | SUMF2                       | sulfatase modifying factor 2                                                            |
| -3.1 | 218796_at    | D | FERMT1                      | fermitin family member 1                                                                |
| -3.1 | 211651_s_at  | D | LAMB1                       | laminin, beta 1                                                                         |
| -3.1 | 201709_s_at  |   | NIPSNAP1                    | nipsnap homolog 1 ( <i>C. elegans</i> )                                                 |
| -3.1 | 1554572_a_at |   | SUV39H2                     | suppressor of variegation 3-9 homolog 2 ( <i>Drosophila</i> )                           |
| -3.1 | 204436_at    |   | PLEKHO2                     | pleckstrin homology domain containing, family O member 2                                |
| -3.1 | 224514_x_at  | D | IL17RC                      | interleukin 17 receptor C                                                               |
| -3.1 | 1558631_at   |   | PPARA                       | peroxisome proliferator-activated receptor alpha                                        |
| -3.1 | 214259_s_at  |   | AKR7A2                      | aldo-keto reductase family 7, member A2 (aflatoxin aldehyde reductase)                  |
| -3.1 | 222993_at    |   | MRPL37 (includes EG:51253)  | mitochondrial ribosomal protein L37                                                     |
| -3.1 | 236533_at    | D | ASAP1                       | ArfGAP with SH3 domain, ankyrin repeat and PH domain 1                                  |
| -3.1 | 224920_x_at  | D | MYADM                       | myeloid-associated differentiation marker family with sequence similarity 109, member B |
| -3.1 | 226504_at    |   | FAM109B                     | MPN domain containing                                                                   |
| -3.1 | 233651_s_at  |   | MPND                        | MPN domain containing                                                                   |
| -3.1 | 229469_at    |   | XAGE2/XAGE2B                | X antigen family, member 2                                                              |
| -3.1 | 222670_s_at  |   | MAFB                        | v-maf musculoaponeurotic fibrosarcoma oncogene homolog B (avian)                        |
| -3.1 | 207212_at    |   | SLC9A3 (includes EG:105243) | solute carrier family 9, subfamily A (NHE3, cation proton antiporter 3), member 3       |
| -3.1 | 230855_at    | D | GATA4                       | GATA binding protein 4                                                                  |
| -3.1 | 1553403_at   |   | RLN3                        | relaxin 3                                                                               |
| -3.1 | 203179_at    |   | GALT                        | galactose-1-phosphate uridylyltransferase                                               |
| -3.1 | 212064_x_at  | D | MAZ                         | MYC-associated zinc finger protein (purine-binding transcription factor)                |
| -3.1 | 229862_x_at  |   | ZBTB45                      | zinc finger and BTB domain containing 45                                                |
| -3.1 | 204104_at    |   | SNAPC2                      | small nuclear RNA activating complex, polypeptide 2, 45kDa                              |
| -3.1 | 201613_s_at  |   | AP1G2                       | adaptor-related protein complex 1, gamma 2 subunit                                      |
| -3.1 | 224727_at    |   | C19orf63                    | chromosome 19 open reading frame 63                                                     |
| -3.1 | 219110_at    |   | GAR1                        | GAR1 ribonucleoprotein homolog (yeast)                                                  |
| -3.1 | 234978_at    |   | SLC36A4                     | solute carrier family 36 (proton/amino acid symporter), member 4                        |
| -3.2 | 221710_x_at  | D | FAM176B                     | family with sequence similarity 176, member B                                           |
| -3.2 | 209361_s_at  |   | PCBP4                       | poly(rC) binding protein 4                                                              |
| -3.2 | 206027_at    |   | S100A3                      | S100 calcium binding protein A3                                                         |
| -3.2 | 210740_s_at  |   | ITPK1                       | inositol-tetrakisphosphate 1-kinase                                                     |
| -3.2 | 207388_s_at  | D | PTGES                       | prostaglandin E synthase                                                                |
| -3.2 | 223647_x_at  |   | HSCB                        | HscB iron-sulfur cluster co-chaperone homolog ( <i>E. coli</i> )                        |
| -3.2 | 228954_at    |   | LYSMD4                      | LysM, putative peptidoglycan-binding, domain containing 4                               |
| -3.2 | 235703_at    |   | PLB1 (includes EG:151056)   | phospholipase B1                                                                        |
| -3.2 | 201639_s_at  | D | CPSF1                       | cleavage and polyadenylation specific factor 1, 160kDa                                  |

Hui L, Wick HC, Edlow AG, Cowan JM, Bianchi DJW. Global gene expression analysis of term amniotic fluid cell-free fetal RNA *Obstet Gynecol* 2013;121.

The authors provided this information as a supplement to their article.

© Copyright 2013 American College of Obstetricians and Gynecologists.

|      |             |   |          |                                                                                               |
|------|-------------|---|----------|-----------------------------------------------------------------------------------------------|
| -3.2 | 211047_x_at | D | AP2S1    | adaptor-related protein complex 2, sigma 1 subunit                                            |
| -3.2 | 204767_s_at |   | FEN1     | flap structure-specific endonuclease 1                                                        |
| -3.2 | 211804_s_at |   | CDK2     | cyclin-dependent kinase 2                                                                     |
| -3.2 | 228252_at   |   | PIF1     | PIF1 5'-to-3' DNA helicase homolog (S. cerevisiae)                                            |
| -3.2 | 221841_s_at | D | KLF4     | Kruppel-like factor 4 (gut)                                                                   |
| -3.2 | 214721_x_at | D | CDC42EP4 | CDC42 effector protein (Rho GTPase binding) 4                                                 |
| -3.2 | 226636_at   | D | PLD1     | phospholipase D1, phosphatidylcholine-specific                                                |
| -3.2 | 218252_at   |   | CKAP2    | cytoskeleton associated protein 2                                                             |
| -3.2 | 234721_s_at |   | CYP26B1  | cytochrome P450, family 26, subfamily B, polypeptide 1                                        |
| -3.2 | 225968_at   |   | PRICKLE2 | prickle homolog 2 (Drosophila)                                                                |
| -3.2 | 213183_s_at | D | CDKN1C   | cyclin-dependent kinase inhibitor 1C (p57, Kip2)                                              |
| -3.2 | 227668_at   |   | C17orf56 | chromosome 17 open reading frame 56                                                           |
| -3.2 | 207592_s_at |   | HCN2     | hyperpolarization activated cyclic nucleotide-gated potassium channel 2                       |
| -3.2 | 233588_x_at | D | PFDN6    | prefoldin subunit 6                                                                           |
| -3.2 | 207023_x_at | D | KRT10    | keratin 10                                                                                    |
| -3.2 | 201368_at   | D | ZFP36L2  | zinc finger protein 36, C3H type-like 2                                                       |
| -3.2 | 207824_s_at | D | MAZ      | MYC-associated zinc finger protein (purine-binding transcription factor)                      |
| -3.2 | 203147_s_at | D | TRIM14   | tripartite motif containing 14                                                                |
| -3.2 | 243943_x_at | D | C6orf52  | chromosome 6 open reading frame 52                                                            |
| -3.2 | 228642_at   | D | HOXA2    | homeobox A2                                                                                   |
| -3.3 | 212047_s_at |   | RNF167   | ring finger protein 167                                                                       |
| -3.3 | 241550_at   |   | DPPA5    | developmental pluripotency associated 5                                                       |
| -3.3 | 207006_s_at |   | CCDC106  | coiled-coil domain containing 106                                                             |
| -3.3 | 209635_at   |   | AP1S1    | adaptor-related protein complex 1, sigma 1 subunit                                            |
| -3.3 | 206949_s_at |   | RUSC1    | RUN and SH3 domain containing 1                                                               |
| -3.3 | 220558_x_at | D | TSPAN32  | tetraspanin 32                                                                                |
| -3.3 | 229610_at   |   | CKAP2L   | cytoskeleton associated protein 2-like                                                        |
| -3.3 | 213724_s_at | D | PDK2     | pyruvate dehydrogenase kinase, isozyme 2                                                      |
| -3.3 | 218062_x_at | D | CDC42EP4 | CDC42 effector protein (Rho GTPase binding) 4                                                 |
| -3.3 | 225342_at   |   | AK4      | adenylate kinase 4                                                                            |
| -3.3 | 238518_x_at |   | GLYCK    | glycerate kinase                                                                              |
| -3.3 | 208788_at   |   | ELOVL5   | ELOVL fatty acid elongase 5                                                                   |
| -3.3 | 228798_x_at | D | MAZ      | MYC-associated zinc finger protein (purine-binding transcription factor)                      |
| -3.3 | 202990_at   |   | PYGL     | phosphorylase, glycogen, liver                                                                |
| -3.3 | 233467_s_at | D | TSPAN32  | tetraspanin 32                                                                                |
| -3.3 | 203587_at   |   | ARL4D    | ADP-ribosylation factor-like 4D                                                               |
| -3.3 | 207788_s_at | D | SORBS3   | sorbin and SH3 domain containing 3                                                            |
| -3.3 | 229736_at   |   | TMEM86B  | transmembrane protein 86B                                                                     |
| -3.3 | 218688_at   |   | DAK      | dihydroxyacetone kinase 2 homolog (S. cerevisiae)                                             |
| -3.3 | 215535_s_at |   | AGPAT1   | 1-acylglycerol-3-phosphate O-acyltransferase 1 (lysophosphatidic acid acyltransferase, alpha) |
| -3.3 | 233325_at   | D | SLC35D2  | solute carrier family 35, member D2                                                           |
| -3.3 | 215909_x_at | D | MINK1    | misshapen-like kinase 1                                                                       |

Hui L, Wick HC, Edlow AG, Cowan JM, Bianchi DJW. Global gene expression analysis of term amniotic fluid cell-free fetal RNA *Obstet Gynecol* 2013;121.

The authors provided this information as a supplement to their article.

© Copyright 2013 American College of Obstetricians and Gynecologists.

|      |              |   |                           |                                                                                              |
|------|--------------|---|---------------------------|----------------------------------------------------------------------------------------------|
| -3.3 | 225505_s_at  |   | FAM113A                   | family with sequence similarity 113, member A                                                |
| -3.3 | 225220_at    |   | SNHG8                     | small nucleolar RNA host gene 8 (non-protein coding)                                         |
| -3.3 | 213779_at    |   | EMID1                     | EMI domain containing 1                                                                      |
| -3.3 | 230709_x_at  | D | ZBTB7A                    | zinc finger and BTB domain containing 7A                                                     |
| -3.3 | 62212_at     |   | C1orf50                   | chromosome 1 open reading frame 50                                                           |
| -3.3 | 223842_s_at  | D | SCARA3                    | scavenger receptor class A, member 3                                                         |
| -3.3 | 203626_s_at  | D | SKP2 (includes EG:27401)  | S-phase kinase-associated protein 2, E3 ubiquitin protein ligase                             |
| -3.3 | 214769_at    |   | CLCN4                     | chloride channel, voltage-sensitive 4                                                        |
| -3.3 | 230244_at    |   | C2orf82                   | chromosome 2 open reading frame 82                                                           |
| -3.3 | 223349_s_at  |   | BOK                       | BCL2-related ovarian killer                                                                  |
| -3.3 | 223431_at    |   | CNO                       | cappuccino homolog (mouse)                                                                   |
| -3.3 | 1568597_at   |   | LOC646762                 | uncharacterized LOC646762                                                                    |
| -3.3 | 228976_at    |   | ICOSLG                    | inducible T-cell co-stimulator ligand                                                        |
| -3.3 | 226723_at    |   | CCDC23                    | coiled-coil domain containing 23                                                             |
| -3.3 | 221587_s_at  |   | C19orf24                  | chromosome 19 open reading frame 24                                                          |
| -3.4 | 220266_s_at  | D | KLF4                      | Kruppel-like factor 4 (gut)                                                                  |
| -3.4 | 231019_x_at  | D | C19orf26                  | chromosome 19 open reading frame 26                                                          |
| -3.4 | 202108_at    |   | PEPD                      | peptidase D                                                                                  |
| -3.4 | 201464_x_at  | D | JUN                       | jun proto-oncogene                                                                           |
| -3.4 | 203625_x_at  | D | SKP2 (includes EG:27401)  | S-phase kinase-associated protein 2, E3 ubiquitin protein ligase                             |
| -3.4 | 221897_at    |   | TRIM52                    | tripartite motif containing 52                                                               |
| -3.4 | 226138_s_at  | D | PPP1R14B                  | protein phosphatase 1, regulatory (inhibitor) subunit 14B                                    |
| -3.4 | 212121_at    | D | TCTN3                     | tectonic family member 3                                                                     |
| -3.4 | 217677_at    | D | PLEKHA2                   | pleckstrin homology domain containing, family A (phosphoinositide binding specific) member 2 |
| -3.4 | 1554600_s_at | D | LMNA                      | lamin A/C                                                                                    |
| -3.4 | 215942_s_at  | D | GTSE1                     | G-2 and S-phase expressed 1                                                                  |
| -3.4 | 213766_x_at  | D | GNA11                     | guanine nucleotide binding protein (G protein), alpha 11 (Gq class)                          |
| -3.4 | 65585_at     | D | FAM86B1 (includes others) | family with sequence similarity 86, member B1                                                |
| -3.4 | 214625_s_at  | D | MINK1                     | misshapen-like kinase 1                                                                      |
| -3.4 | 225844_at    |   | POLE4                     | polymerase (DNA-directed), epsilon 4 (p12 subunit)                                           |
| -3.4 | 207480_s_at  |   | MEIS2                     | Meis homeobox 2                                                                              |
| -3.4 | 218599_at    |   | REC8 (includes EG:290227) | REC8 homolog (yeast)                                                                         |
| -3.4 | 220974_x_at  | D | SFXN3                     | sideroflexin 3                                                                               |
| -3.4 | 205795_at    | D | NRXN3                     | neurexin 3                                                                                   |
| -3.4 | 219265_at    |   | MOB3B                     | MOB kinase activator 3B                                                                      |
| -3.4 | 220217_x_at  |   | SPANXA2 (includes others) | SPANX family, member A2                                                                      |
| -3.4 | 223389_s_at  |   | ZNF581                    | zinc finger protein 581                                                                      |
| -3.4 | 40640_at     |   | NCAPH2                    | non-SMC condensin II complex, subunit H2                                                     |
| -3.4 | 207044_at    | D | THRB                      | thyroid hormone receptor, beta                                                               |
| -3.4 | 228193_s_at  | D | RGCC                      | regulator of cell cycle                                                                      |
| -3.4 | 231814_at    | D | MUC12                     | mucin 12, cell surface associated                                                            |

Hui L, Wick HC, Edlow AG, Cowan JM, Bianchi DJW. Global gene expression analysis of term amniotic fluid cell-free fetal RNA *Obstet Gynecol* 2013;121.

The authors provided this information as a supplement to their article.

© Copyright 2013 American College of Obstetricians and Gynecologists.

|      |              |   |                 |                                                                     |
|------|--------------|---|-----------------|---------------------------------------------------------------------|
| -3.4 | 236057_at    | D | KCTD1           | potassium channel tetramerisation domain containing 1               |
| -3.4 | 45714_at     | D | HCFC1R1         | host cell factor C1 regulator 1 (XPO1 dependent)                    |
| -3.5 | 205184_at    | D | GNG4            | guanine nucleotide binding protein (G protein), gamma 4             |
| -3.5 | 215706_x_at  | D | ZYX             | zyxin                                                               |
| -3.5 | 205253_at    | D | PBX1            | pre-B-cell leukemia homeobox 1                                      |
| -3.5 | 208636_at    | D | ACTN1           | actinin, alpha 1                                                    |
| -3.5 | 201750_s_at  |   | ECE1            | endothelin converting enzyme 1                                      |
| -3.5 | 206266_at    |   | GPLD1           | glycosylphosphatidylinositol specific phospholipase D1              |
| -3.5 | 218644_at    |   | PLEK2           | pleckstrin 2                                                        |
| -3.5 | 91617_at     |   | DGCR8           | DiGeorge syndrome critical region gene 8                            |
| -3.5 | 224002_s_at  |   | FKBP7           | FK506 binding protein 7                                             |
| -3.5 | 202639_s_at  |   | RANBP3          | RAN binding protein 3                                               |
| -3.5 | 224796_at    | D | ASAP1           | ArfGAP with SH3 domain, ankyrin repeat and PH domain 1              |
| -3.5 | 210223_s_at  |   | MR1             | major histocompatibility complex, class I-related                   |
| -3.5 | 225707_at    |   | ARL6IP6         | ADP-ribosylation-like factor 6 interacting protein 6                |
| -3.5 | 205965_at    |   | BATF            | basic leucine zipper transcription factor, ATF-like                 |
| -3.5 | 40562_at     | D | GNA11           | guanine nucleotide binding protein (G protein), alpha 11 (Gq class) |
| -3.5 | 202651_at    | D | LPGAT1          | lysophosphatidylglycerol acyltransferase 1                          |
| -3.5 | 210580_x_at  |   | SULT1A3/SULT1A4 | sulfotransferase family, cytosolic, 1A, phenol-preferring, member 3 |
| -3.5 | 218668_s_at  |   | RAP2C           | RAP2C, member of RAS oncogene family                                |
| -3.5 | 205145_s_at  |   | MYL5            | myosin, light chain 5, regulatory                                   |
| -3.5 | 221284_s_at  | D | SRC             | v-src sarcoma (Schmidt-Ruppin A-2) viral oncogene homolog (avian)   |
| -3.6 | 205129_at    |   | NPM3            | nucleophosmin/nucleoplasmin 3                                       |
| -3.6 | 221939_at    | D | YIPF2           | Yip1 domain family, member 2                                        |
| -3.6 | 1569469_a_at |   | LHX8            | LIM homeobox 8                                                      |
| -3.6 | 213082_s_at  | D | SLC35D2         | solute carrier family 35, member D2                                 |
| -3.6 | 209404_s_at  |   | TMED7           | transmembrane emp24 protein transport domain containing 7           |
| -3.6 | 212925_at    |   | C19orf21        | chromosome 19 open reading frame 21                                 |
| -3.6 | 228151_at    |   | ARL15           | ADP-ribosylation factor-like 15                                     |
| -3.6 | 226849_at    |   | DENND1A         | DENN/MADD domain containing 1A                                      |
| -3.6 | 1553105_s_at |   | DSG2            | desmoglein 2                                                        |
| -3.6 | 1554429_a_at |   | DMWD            | dystrophia myotonica, WD repeat containing                          |
| -3.6 | 205760_s_at  | D | OGG1            | 8-oxoguanine DNA glycosylase                                        |
| -3.6 | 229545_at    | D | FERMT1          | fermitin family member 1                                            |
| -3.6 | 210846_x_at  | D | TRIM14          | tripartite motif containing 14                                      |
| -3.6 | 205024_s_at  |   | RAD51           | RAD51 homolog (S. cerevisiae)                                       |
| -3.6 | 205331_s_at  |   | REEP2           | receptor accessory protein 2                                        |
| -3.6 | 224639_at    |   | SPPL3           | signal peptide peptidase like 3                                     |
| -3.6 | 223234_at    |   | MAD2L2          | MAD2 mitotic arrest deficient-like 2 (yeast)                        |
| -3.6 | 225258_at    | D | FBLIM1          | filamin binding LIM protein 1                                       |
| -3.6 | 90265_at     |   | ADAP1           | ArfGAP with dual PH domains 1                                       |
| -3.6 | 205375_at    |   | MDFI            | MyoD family inhibitor                                               |

Hui L, Wick HC, Edlow AG, Cowan JM, Bianchi DJW. Global gene expression analysis of term amniotic fluid cell-free fetal RNA *Obstet Gynecol* 2013;121.

The authors provided this information as a supplement to their article.

© Copyright 2013 American College of Obstetricians and Gynecologists.

|      |              |   |                         |                                                           |
|------|--------------|---|-------------------------|-----------------------------------------------------------|
| -3.6 | 65472_at     |   | C2orf68                 | chromosome 2 open reading frame 68                        |
| -3.6 | 203835_at    |   | LRRC32                  | leucine rich repeat containing 32                         |
| -3.6 | 226559_at    |   | IER5L                   | immediate early response 5-like                           |
| -3.6 | 1557049_at   |   | BTBD19                  | BTB (POZ) domain containing 19                            |
| -3.6 | 74694_s_at   |   | RABEP2                  | rabaptin, RAB GTPase binding effector protein 2           |
| -3.6 | 218995_s_at  | D | EDN1                    | endothelin 1                                              |
| -3.6 | 201692_at    |   | SIGMAR1                 | sigma non-opioid intracellular receptor 1                 |
| -3.6 | 227850_x_at  |   | CDC42EP5                | CDC42 effector protein (Rho GTPase binding) 5             |
| -3.6 | 232160_s_at  | D | TNIP2                   | TNFAIP3 interacting protein 2                             |
| -3.7 | 212135_s_at  |   | ATP2B4                  | ATPase, Ca++ transporting, plasma membrane 4              |
| -3.7 | 210821_x_at  |   | CENPA                   | centromere protein A                                      |
| -3.7 | 214470_at    |   | KLRB1                   | killer cell lectin-like receptor subfamily B, member 1    |
| -3.7 | 203074_at    |   | ANXA8L2                 | annexin A8-like 2                                         |
| -3.7 | 202718_at    |   | IGFBP2                  | insulin-like growth factor binding protein 2, 36kDa       |
| -3.7 | 226462_at    | D | STXBP6                  | syntaxin binding protein 6 (amisyn)                       |
| -3.7 | 215243_s_at  | D | GJB3                    | gap junction protein, beta 3, 31kDa                       |
| -3.7 | 208515_at    |   | HIST1H2BM               | histone cluster 1, H2bm                                   |
| -3.7 | 212732_at    | D | MEG3                    | maternally expressed 3 (non-protein coding)               |
| -3.7 | 239417_x_at  | D | C6orf52                 | chromosome 6 open reading frame 52                        |
| -3.7 | 209166_s_at  |   | MAN2B1                  | mannosidase, alpha, class 2B, member 1                    |
| -3.7 | 229262_at    | D | PPP1R37                 | protein phosphatase 1, regulatory subunit 37              |
| -3.7 | 208677_s_at  |   | BSG (includes EG:12215) | basigin (Ok blood group)                                  |
| -3.7 | 1560974_s_at |   | NOS1                    | nitric oxide synthase 1 (neuronal)                        |
| -3.7 | 233634_at    |   | MARVELD3                | MARVEL domain containing 3                                |
| -3.7 | 203819_s_at  | D | IGF2BP3                 | insulin-like growth factor 2 mRNA binding protein 3       |
| -3.7 | 235085_at    |   | SGK223                  | homolog of rat pragma of Rnd2                             |
| -3.7 | 226826_at    |   | LSM11                   | LSM11, U7 small nuclear RNA associated                    |
| -3.7 | 201032_at    |   | BLCAP                   | bladder cancer associated protein                         |
| -3.7 | 226004_at    |   | CABLES2                 | Cdk5 and Abl enzyme substrate 2                           |
| -3.7 | 230436_s_at  |   | CENPV                   | centromere protein V                                      |
| -3.7 | 239316_at    |   | METTL12                 | methyltransferase like 12                                 |
| -3.7 | 228280_at    | D | ZC3HAV1L                | zinc finger CCCH-type, antiviral 1-like                   |
| -3.7 | 216662_at    | D | MYO7B                   | myosin VIIb                                               |
| -3.7 | 226793_at    |   | LINC00294               | long intergenic non-protein coding RNA 294                |
| -3.7 | 229265_at    | D | SKI                     | v-ski sarcoma viral oncogene homolog (avian)              |
| -3.7 | 225717_at    |   | KIAA1715                | KIAA1715                                                  |
| -3.7 | 205865_at    |   | ARID3A                  | AT rich interactive domain 3A (BRIGHT-like)               |
| -3.8 | 242288_s_at  | D | EMILIN2                 | elastin microfibril interfacier 2                         |
| -3.8 | 212013_at    | D | PXDN                    | peroxidasin homolog (Drosophila)                          |
| -3.8 | 1553990_at   |   | C16orf79                | chromosome 16 open reading frame 79                       |
| -3.8 | 205011_at    |   | VWA5A                   | von Willebrand factor A domain containing 5A              |
| -3.8 | 230440_at    |   | ZNF469                  | zinc finger protein 469                                   |
| -3.8 | 204916_at    |   | RAMP1                   | receptor (G protein-coupled) activity modifying protein 1 |
| -3.8 | 1553088_a_at |   | BCL2L11                 | BCL2-like 11 (apoptosis facilitator)                      |

Hui L, Wick HC, Edlow AG, Cowan JM, Bianchi DJW. Global gene expression analysis of term amniotic fluid cell-free fetal RNA *Obstet Gynecol* 2013;121.

The authors provided this information as a supplement to their article.

© Copyright 2013 American College of Obstetricians and Gynecologists.



|      |             |   |                            |                                                                       |
|------|-------------|---|----------------------------|-----------------------------------------------------------------------|
| -3.8 | 212148_at   | D | PBX1                       | pre-B-cell leukemia homeobox 1                                        |
| -3.8 | 203701_s_at |   | TRMT1                      | TRM1 tRNA methyltransferase 1 homolog (S. cerevisiae)                 |
| -3.8 | 211823_s_at | D | PXN                        | paxillin                                                              |
| -3.8 | 227128_s_at |   | TACSTD2                    | tumor-associated calcium signal transducer 2                          |
| -3.8 | 223104_at   |   | JAGN1                      | jagunal homolog 1 (Drosophila)                                        |
| -3.8 | 202120_x_at | D | AP2S1                      | adaptor-related protein complex 2, sigma 1 subunit                    |
| -3.8 | 213348_at   | D | CDKN1C                     | cyclin-dependent kinase inhibitor 1C (p57, Kip2)                      |
| -3.8 | 215218_s_at |   | WDR62                      | WD repeat domain 62                                                   |
| -3.8 | 225592_at   |   | NRM                        | nurim (nuclear envelope membrane protein)                             |
| -3.8 | 37384_at    | D | PPM1F                      | protein phosphatase, Mg <sup>2+</sup> /Mn <sup>2+</sup> dependent, 1F |
| -3.8 | 210987_x_at | D | TPM1 (includes EG:22003)   | tropomyosin 1 (alpha)                                                 |
| -3.8 | 204750_s_at | D | DSC2                       | desmocollin 2                                                         |
| -3.8 | 210768_x_at | D | TMCO1                      | transmembrane and coiled-coil domains 1                               |
| -3.8 | 231669_at   | D | SEPP1                      | selenoprotein P, plasma, 1                                            |
| -3.8 | 209253_at   | D | SORBS3                     | sorbin and SH3 domain containing 3                                    |
| -3.8 | 204934_s_at |   | HPN                        | hepsin                                                                |
| -3.8 | 226944_at   | D | HTRA3                      | HtrA serine peptidase 3                                               |
| -3.9 | 224851_at   | D | CDK6                       | cyclin-dependent kinase 6                                             |
| -3.9 | 225272_at   |   | SAT2                       | spermidine/spermine N1-acetyltransferase family member 2              |
| -3.9 | 229690_at   |   | FAM109A                    | family with sequence similarity 109, member A                         |
| -3.9 | 202248_at   | D | E2F4                       | E2F transcription factor 4, p107/p130-binding                         |
| -3.9 | 211160_x_at | D | ACTN1                      | actinin, alpha 1                                                      |
| -3.9 | 228922_at   |   | SHF                        | Src homology 2 domain containing F                                    |
| -3.9 | 209727_at   | D | GM2A                       | GM2 ganglioside activator                                             |
| -3.9 | 202870_s_at |   | CDC20 (includes EG:107995) | cell division cycle 20 homolog (S. cerevisiae)                        |
| -3.9 | 226328_at   |   | KLF16                      | Kruppel-like factor 16                                                |
| -3.9 | 212662_at   |   | PVR                        | poliovirus receptor                                                   |
| -3.9 | 241986_at   |   | BMPER                      | BMP binding endothelial regulator                                     |
| -3.9 | 231392_at   |   | GLB1L2                     | galactosidase, beta 1-like 2                                          |
| -3.9 | 201937_s_at | D | DNPEP                      | aspartyl aminopeptidase                                               |
| -3.9 | 219215_s_at |   | SLC39A4                    | solute carrier family 39 (zinc transporter), member 4                 |
| -3.9 | 228587_at   |   | FAM83G                     | family with sequence similarity 83, member G                          |
| -3.9 | 236141_at   |   | NBLA00301                  | Nbla00301                                                             |
| -3.9 | 208637_x_at | D | ACTN1                      | actinin, alpha 1                                                      |
| -3.9 | 1553045_at  |   | WNT9A                      | wingless-type MMTV integration site family, member 9A                 |
| -3.9 | 225150_s_at | D | RTKN                       | rhotekin                                                              |
| -3.9 | 200808_s_at | D | ZYX                        | zyxin                                                                 |
| -3.9 | 203729_at   |   | EMP3                       | epithelial membrane protein 3                                         |
| -3.9 | 214701_s_at | D | FN1                        | fibronectin 1                                                         |
| -3.9 | 211098_x_at | D | TMCO1                      | transmembrane and coiled-coil domains 1                               |
| -3.9 | 203846_at   |   | TRIM32                     | tripartite motif containing 32                                        |
| -3.9 | 213451_x_at | D | TNXB                       | tenascin XB                                                           |

Hui L, Wick HC, Edlow AG, Cowan JM, Bianchi DJW. Global gene expression analysis of term amniotic fluid cell-free fetal RNA *Obstet Gynecol* 2013;121.

The authors provided this information as a supplement to their article.

© Copyright 2013 American College of Obstetricians and Gynecologists.

|      |              |   |                        |                                                                                             |
|------|--------------|---|------------------------|---------------------------------------------------------------------------------------------|
| -3.9 | 210363_s_at  |   | SCN2B                  | sodium channel, voltage-gated, type II, beta subunit                                        |
| -3.9 | 207576_x_at  |   | OXT                    | oxytocin, prepropeptide                                                                     |
| -3.9 | 218182_s_at  |   | CLDN1                  | claudin 1                                                                                   |
| -3.9 | 202027_at    |   | TMEM184B               | transmembrane protein 184B                                                                  |
| -4.0 | 204928_s_at  |   | SLC10A3                | solute carrier family 10 (sodium/bile acid cotransporter family), member 3                  |
| -4.0 | 219336_s_at  |   | ASCC1                  | activating signal cointegrator 1 complex subunit 1                                          |
| -4.0 | 213787_s_at  | D | EBP                    | emopamil binding protein (sterol isomerase)                                                 |
| -4.0 | 231675_s_at  |   | ADH4 (includes EG:127) | alcohol dehydrogenase 4 (class II), pi polypeptide                                          |
| -4.0 | 230620_at    |   | USP27X                 | ubiquitin specific peptidase 27, X-linked                                                   |
| -4.0 | 206093_x_at  | D | TNXB                   | tenascin XB                                                                                 |
| -4.0 | 220868_s_at  |   | SLC7A10                | solute carrier family 7 (neutral amino acid transporter light chain, asc system), member 10 |
| -4.0 | 203954_x_at  |   | CLDN3                  | claudin 3                                                                                   |
| -4.0 | 209625_at    |   | PIGH                   | phosphatidylinositol glycan anchor biosynthesis, class H                                    |
| -4.0 | 1566323_at   | D | MAF                    | v-maf musculoaponeurotic fibrosarcoma oncogene homolog (avian)                              |
| -4.0 | 226417_at    |   | RHOB                   | ras homolog family member B                                                                 |
| -4.0 | 218537_at    | D | HCFC1R1                | host cell factor C1 regulator 1 (XPO1 dependent)                                            |
| -4.0 | 213771_at    |   | IRF2BP1                | interferon regulatory factor 2 binding protein 1                                            |
| -4.0 | 218955_at    |   | BRF2                   | BRF2, subunit of RNA polymerase III transcription initiation factor, BRF1-like              |
| -4.0 | 227572_at    |   | USP30                  | ubiquitin specific peptidase 30                                                             |
| -4.0 | 1553781_at   | D | ZC3HAV1L               | zinc finger CCCH-type, antiviral 1-like                                                     |
| -4.0 | 214797_s_at  |   | CDK18                  | cyclin-dependent kinase 18                                                                  |
| -4.0 | 207595_s_at  | D | BMP1                   | bone morphogenetic protein 1                                                                |
| -4.0 | 1564630_at   | D | EDN1                   | endothelin 1                                                                                |
| -4.0 | 205490_x_at  | D | GJB3                   | gap junction protein, beta 3, 31kDa                                                         |
| -4.0 | 202366_at    |   | ACADS                  | acyl-CoA dehydrogenase, C-2 to C-3 short chain                                              |
| -4.0 | 203440_at    |   | CDH2                   | cadherin 2, type 1, N-cadherin (neuronal)                                                   |
| -4.1 | 201308_s_at  |   | SEPT11                 | septin 11                                                                                   |
| -4.1 | 204751_x_at  | D | DSC2                   | desmocollin 2                                                                               |
| -4.1 | 202095_s_at  | D | BIRC5                  | baculoviral IAP repeat containing 5                                                         |
| -4.1 | 204014_at    |   | DUSP4                  | dual specificity phosphatase 4                                                              |
| -4.1 | 244126_at    |   | PEX11G                 | peroxisomal biogenesis factor 11 gamma                                                      |
| -4.1 | 203554_x_at  |   | PTTG1                  | pituitary tumor-forming 1                                                                   |
| -4.1 | 214537_at    |   | HIST1H1D               | histone cluster 1, H1d                                                                      |
| -4.1 | 219500_at    |   | CLCF1                  | cardiotrophin-like cytokine factor 1                                                        |
| -4.1 | 205194_at    |   | PSPH                   | phosphoserine phosphatase                                                                   |
| -4.1 | 1553031_at   | D | GPR115                 | G protein-coupled receptor 115                                                              |
| -4.1 | 1559075_s_at |   | BAHCC1                 | BAH domain and coiled-coil containing 1                                                     |
| -4.1 | 200923_at    |   | LGALS3BP               | lectin, galactoside-binding, soluble, 3 binding protein                                     |
| -4.1 | 45297_at     | D | EHD2                   | EH-domain containing 2                                                                      |
| -4.1 | 221512_at    |   | TMEM222                | transmembrane protein 222                                                                   |
| -4.1 | 212533_at    |   | WEE1                   | WEE1 homolog (S. pombe)                                                                     |
| -4.1 | 202756_s_at  |   | GPC1                   | glypican 1                                                                                  |

Hui L, Wick HC, Edlow AG, Cowan JM, Bianchi DJW. Global gene expression analysis of term amniotic fluid cell-free fetal RNA *Obstet Gynecol* 2013;121.

The authors provided this information as a supplement to their article.

© Copyright 2013 American College of Obstetricians and Gynecologists.

|      |              |   |                             |                                                                                  |
|------|--------------|---|-----------------------------|----------------------------------------------------------------------------------|
| -4.1 | 227891_s_at  |   | TAF15                       | TAF15 RNA polymerase II, TATA box binding protein (TBP)-associated factor, 68kDa |
| -4.1 | 1560119_at   |   | LOC389634                   | uncharacterized LOC389634                                                        |
| -4.2 | 1568604_a_at |   | CADPS                       | Ca <sup>++</sup> -dependent secretion activator                                  |
| -4.2 | 224848_at    | D | CDK6                        | cyclin-dependent kinase 6                                                        |
| -4.2 | 63305_at     | D | PKNOX2                      | PBX/knotted 1 homeobox 2                                                         |
| -4.2 | 235463_s_at  |   | CERS6                       | ceramide synthase 6                                                              |
| -4.2 | 214542_x_at  | D | HIST1H2AG (includes others) | histone cluster 1, H2ag                                                          |
| -4.2 | 209000_s_at  |   | SEPT8                       | septin 8                                                                         |
| -4.2 | 200953_s_at  | D | CCND2                       | cyclin D2                                                                        |
| -4.2 | 213770_at    | D | KSR1                        | kinase suppressor of ras 1                                                       |
| -4.2 | 236134_at    |   | DCAF7                       | DDB1 and CUL4 associated factor 7                                                |
| -4.2 | 232506_s_at  | D | C15orf41                    | chromosome 15 open reading frame 41                                              |
| -4.2 | 229276_at    |   | IGSF9                       | immunoglobulin superfamily, member 9                                             |
| -4.2 | 213422_s_at  | D | MXRA8                       | matrix-remodelling associated 8                                                  |
| -4.2 | 232467_at    |   | KIRREL                      | kin of IRRE like (Drosophila)                                                    |
| -4.2 | 1566288_at   |   | OR2M4                       | olfactory receptor, family 2, subfamily M, member 4                              |
| -4.2 | 205932_s_at  |   | MSX1                        | msh homeobox 1                                                                   |
| -4.2 | 218702_at    |   | SARS2                       | seryl-tRNA synthetase 2, mitochondrial                                           |
| -4.2 | 1559477_s_at |   | MEIS1                       | Meis homeobox 1                                                                  |
| -4.2 | 225458_at    |   | PP7080                      | uncharacterized LOC25845                                                         |
| -4.2 | 202740_at    |   | ACY1                        | aminoacylase 1                                                                   |
| -4.2 | 60474_at     | D | FERMT1                      | fermitin family member 1                                                         |
| -4.2 | 223169_s_at  | D | RHOU                        | ras homolog family member U                                                      |
| -4.2 | 210594_x_at  | D | MPZL1                       | myelin protein zero-like 1                                                       |
| -4.2 | 243452_at    |   | LOC646778                   | uncharacterized LOC646778                                                        |
| -4.2 | 213226_at    | D | CCNA2                       | cyclin A2                                                                        |
| -4.3 | 209220_at    |   | GPC3                        | glypican 3                                                                       |
| -4.3 | 224847_at    | D | CDK6                        | cyclin-dependent kinase 6                                                        |
| -4.3 | 211042_x_at  |   | MCAM                        | melanoma cell adhesion molecule                                                  |
| -4.3 | 226452_at    |   | PDK1                        | pyruvate dehydrogenase kinase, isozyme 1                                         |
| -4.3 | 201616_s_at  | D | CALD1                       | caldesmon 1                                                                      |
| -4.3 | 207170_s_at  |   | LETMD1                      | LETM1 domain containing 1                                                        |
| -4.3 | 1552281_at   | D | SLC39A5                     | solute carrier family 39 (metal ion transporter), member 5                       |
| -4.3 | 213223_at    |   | RPL28                       | ribosomal protein L28                                                            |
| -4.3 | 229730_at    |   | SMTNL2                      | smoothelin-like 2                                                                |
| -4.3 | 221210_s_at  |   | NPL                         | N-acetylneuraminatase pyruvate lyase (dihydrodipicolinate synthase)              |
| -4.3 | 215148_s_at  |   | APBA3                       | amyloid beta (A4) precursor protein-binding, family A, member 3                  |
| -4.3 | 211226_at    |   | GALR2                       | galanin receptor 2                                                               |
| -4.3 | 234456_at    |   | TRAPPC4                     | trafficking protein particle complex 4                                           |
| -4.3 | 219744_at    |   | FN3K                        | fructosamine 3 kinase                                                            |
| -4.3 | 221870_at    | D | EHD2                        | EH-domain containing 2                                                           |
| -4.3 | 204408_at    |   | APEX2                       | APEX nuclease (apurinic/apyrimidinic endonuclease) 2                             |
| -4.4 | 208484_at    |   | HIST1H1A                    | histone cluster 1, H1a                                                           |
| -4.4 | 239853_at    |   | KLC3                        | kinesin light chain 3                                                            |

Hui L, Wick HC, Edlow AG, Cowan JM, Bianchi DJW. Global gene expression analysis of term amniotic fluid cell-free fetal RNA *Obstet Gynecol* 2013;121.

The authors provided this information as a supplement to their article.

© Copyright 2013 American College of Obstetricians and Gynecologists.

|      |             |   |                          |                                                                                              |
|------|-------------|---|--------------------------|----------------------------------------------------------------------------------------------|
| -4.4 | 228168_at   |   | ATP5G3                   | ATP synthase, H <sup>+</sup> transporting, mitochondrial Fo complex, subunit C3 (subunit 9)  |
| -4.4 | 218723_s_at | D | RGCC                     | regulator of cell cycle                                                                      |
| -4.4 | 225533_at   |   | PHF19                    | PHD finger protein 19                                                                        |
| -4.4 | 201428_at   |   | CLDN4                    | claudin 4                                                                                    |
| -4.4 | 223316_at   |   | CCDC3                    | coiled-coil domain containing 3                                                              |
| -4.4 | 226667_x_at |   | EPN1                     | epsin 1                                                                                      |
| -4.4 | 225605_at   |   | TP53113                  | tumor protein p53 inducible protein 13                                                       |
| -4.4 | 220470_at   |   | BET1L                    | blocked early in transport 1 homolog (S. cerevisiae)-like                                    |
| -4.4 | 218576_s_at |   | DUSP12                   | dual specificity phosphatase 12                                                              |
| -4.4 | 222802_at   | D | EDN1                     | endothelin 1                                                                                 |
| -4.4 | 226113_at   |   | ZNF436                   | zinc finger protein 436                                                                      |
| -4.4 | 235287_at   | D | CDK6                     | cyclin-dependent kinase 6                                                                    |
| -4.4 | 212801_at   |   | CIT                      | citron (rho-interacting, serine/threonine kinase 21)                                         |
| -4.4 | 218450_at   |   | HEBP1                    | heme binding protein 1                                                                       |
| -4.4 | 210986_s_at | D | TPM1 (includes EG:22003) | tropomyosin 1 (alpha)                                                                        |
| -4.4 | 209039_x_at | D | EHD1                     | EH-domain containing 1                                                                       |
| -4.4 | 217303_s_at |   | ADRB3                    | adrenergic, beta-3-, receptor                                                                |
| -4.5 | 228959_at   |   | PDK3                     | pyruvate dehydrogenase kinase, isozyme 3                                                     |
| -4.5 | 213324_at   | D | SRC                      | v-src sarcoma (Schmidt-Ruppin A-2) viral oncogene homolog (avian)                            |
| -4.5 | 229458_s_at | D | GALK1                    | galactokinase 1                                                                              |
| -4.5 | 205797_s_at |   | TCP11L1                  | t-complex 11 (mouse)-like 1                                                                  |
| -4.5 | 227476_at   | D | LPGAT1                   | lysophosphatidylglycerol acyltransferase 1                                                   |
| -4.5 | 216333_x_at | D | TNXB                     | tenascin XB                                                                                  |
| -4.5 | 224059_s_at |   | NUMBL                    | numb homolog (Drosophila)-like                                                               |
| -4.5 | 221955_at   | D | GNA11                    | guanine nucleotide binding protein (G protein), alpha 11 (Gq class)                          |
| -4.5 | 206217_at   |   | EDA                      | ectodysplasin A                                                                              |
| -4.5 | 226260_x_at | D | ZNF358                   | zinc finger protein 358                                                                      |
| -4.5 | 201615_x_at | D | CALD1                    | caldesmon 1                                                                                  |
| -4.5 | 32837_at    |   | AGPAT2                   | 1-acylglycerol-3-phosphate O-acyltransferase 2 (lysophosphatidic acid acyltransferase, beta) |
| -4.5 | 219305_x_at | D | FBXO2                    | F-box protein 2                                                                              |
| -4.5 | 227655_at   |   | LOC100505806             | uncharacterized LOC100505806                                                                 |
| -4.6 | 205203_at   | D | PLD1                     | phospholipase D1, phosphatidylcholine-specific                                               |
| -4.6 | 208112_x_at | D | EHD1                     | EH-domain containing 1                                                                       |
| -4.6 | 209044_x_at |   | SF3B4                    | splicing factor 3b, subunit 4, 49kDa                                                         |
| -4.6 | 213258_at   |   | TFPI                     | tissue factor pathway inhibitor (lipoprotein-associated coagulation inhibitor)               |
| -4.6 | 215293_s_at | D | PGAP2                    | post-GPI attachment to proteins 2                                                            |
| -4.6 | 222124_at   | D | HIF3A                    | hypoxia inducible factor 3, alpha subunit                                                    |
| -4.6 | 224927_at   |   | PPP1R18                  | protein phosphatase 1, regulatory subunit 18                                                 |
| -4.6 | 242123_at   |   | PAQR7                    | progesterin and adipoQ receptor family member VII                                            |
| -4.6 | 203426_s_at | D | IGFBP5                   | insulin-like growth factor binding protein 5                                                 |
| -4.6 | 220186_s_at |   | CDHR2                    | cadherin-related family member 2                                                             |
| -4.6 | 155655_at   |   | LOC100129461             | uncharacterized LOC100129461                                                                 |

Hui L, Wick HC, Edlow AG, Cowan JM, Bianchi DJW. Global gene expression analysis of term amniotic fluid cell-free fetal RNA *Obstet Gynecol* 2013;121.

The authors provided this information as a supplement to their article.

© Copyright 2013 American College of Obstetricians and Gynecologists.

|      |              |   |                            |                                                                                         |
|------|--------------|---|----------------------------|-----------------------------------------------------------------------------------------|
| -4.6 | 204432_at    |   | SOX12                      | SRY (sex determining region Y)-box 12                                                   |
| -4.6 | 215389_s_at  |   | TNNT2 (includes EG: 21956) | troponin T type 2 (cardiac)                                                             |
| -4.6 | 205693_at    | D | TNNT3                      | troponin T type 3 (skeletal, fast)                                                      |
| -4.6 | 214540_at    | D | HIST1H2BH/HIST1H2BO        | histone cluster 1, H2bo                                                                 |
| -4.6 | 202663_at    | D | WIPF1                      | WAS/WASL interacting protein family, member 1                                           |
| -4.7 | 226379_s_at  |   | C19orf25                   | chromosome 19 open reading frame 25                                                     |
| -4.7 | 214776_x_at  |   | XYLB                       | xylulokinase homolog (H. influenzae)                                                    |
| -4.7 | 219346_at    |   | LRFN3                      | leucine rich repeat and fibronectin type III domain containing 3                        |
| -4.7 | 221231_s_at  |   | C14orf102                  | chromosome 14 open reading frame 102                                                    |
| -4.7 | 210349_at    |   | CAMK4                      | calcium/calmodulin-dependent protein kinase IV                                          |
| -4.7 | 223385_at    |   | CYP2S1                     | cytochrome P450, family 2, subfamily S, polypeptide 1                                   |
| -4.7 | 1555688_s_at |   | SLA2                       | Src-like-adaptor 2                                                                      |
| -4.7 | 214562_at    |   | HIST1H4A (includes others) | histone cluster 1, H4a                                                                  |
| -4.7 | 1555765_a_at | D | GNG4                       | guanine nucleotide binding protein (G protein), gamma 4                                 |
| -4.8 | 231243_s_at  |   | BHLHE41                    | basic helix-loop-helix family, member e41                                               |
| -4.8 | 226173_at    |   | TBC1D25                    | TBC1 domain family, member 25                                                           |
| -4.8 | 213281_at    | D | JUN                        | jun proto-oncogene                                                                      |
| -4.8 | 231868_at    |   | HOMEZ                      | homeobox and leucine zipper encoding                                                    |
| -4.8 | 218009_s_at  |   | PRC1 (includes EG: 233406) | protein regulator of cytokinesis 1                                                      |
| -4.8 | 218237_s_at  | D | SLC38A1                    | solute carrier family 38, member 1                                                      |
| -4.8 | 235768_at    | D | SH3RF2                     | SH3 domain containing ring finger 2                                                     |
| -4.8 | 214987_at    |   | GAB1                       | GRB2-associated binding protein 1                                                       |
| -4.8 | 220911_s_at  |   | NYNRIN                     | NYN domain and retroviral integrase containing                                          |
| -4.8 | 211564_s_at  | D | PDLIM4                     | PDZ and LIM domain 4                                                                    |
| -4.8 | 214013_s_at  | D | TBC1D1                     | TBC1 (tre-2/USP6, BUB2, cdc16) domain family, member 1                                  |
| -4.8 | 239145_at    |   | ZNF414                     | zinc finger protein 414                                                                 |
| -4.8 | 229307_at    |   | ANKRD28                    | ankyrin repeat domain 28                                                                |
| -4.8 | 228261_at    |   | MIB2                       | mindbomb E3 ubiquitin protein ligase 2                                                  |
| -4.8 | 206771_at    |   | UPK3A                      | uroplakin 3A                                                                            |
| -4.9 | 202330_s_at  |   | UNG                        | uracil-DNA glycosylase                                                                  |
| -4.9 | 203612_at    |   | BYSL                       | bystin-like                                                                             |
| -4.9 | 238514_at    |   | TMEM25                     | transmembrane protein 25                                                                |
| -4.9 | 230840_at    |   | LOC388588                  | uncharacterized protein LOC388588                                                       |
| -4.9 | 1565611_at   |   | DYNLRB1                    | dynein, light chain, roadblock-type 1                                                   |
| -4.9 | 213961_s_at  |   | TAF6L                      | TAF6-like RNA polymerase II, p300/CBP-associated factor (PCAF)-associated factor, 65kDa |
| -4.9 | 209204_at    |   | LMO4                       | LIM domain only 4                                                                       |
| -4.9 | 203184_at    |   | FBN2 (includes EG: 14119)  | fibrillin 2                                                                             |
| -4.9 | 205031_at    |   | EFNB3                      | ephrin-B3                                                                               |
| -4.9 | 216018_at    |   | RNF5                       | ring finger protein 5, E3 ubiquitin protein ligase                                      |
| -4.9 | 209466_x_at  | D | PTN                        | pleiotrophin                                                                            |

Hui L, Wick HC, Edlow AG, Cowan JM, Bianchi DJW. Global gene expression analysis of term amniotic fluid cell-free fetal RNA *Obstet Gynecol* 2013;121.

The authors provided this information as a supplement to their article.

© Copyright 2013 American College of Obstetricians and Gynecologists.

|      |              |   |                          |                                                                                           |
|------|--------------|---|--------------------------|-------------------------------------------------------------------------------------------|
| -4.9 | 214430_at    |   | GLA                      | galactosidase, alpha                                                                      |
| -4.9 | 238703_at    |   | FAM207A                  | family with sequence similarity 207, member A                                             |
| -4.9 | 37462_i_at   | D | SF3A2                    | splicing factor 3a, subunit 2, 66kDa                                                      |
| -4.9 | 231021_at    | D | SLC6A19                  | solute carrier family 6 (neutral amino acid transporter), member 19                       |
| -4.9 | 1556069_s_at | D | HIF3A                    | hypoxia inducible factor 3, alpha subunit                                                 |
| -4.9 | 219246_s_at  |   | OGFOD2                   | 2-oxoglutarate and iron-dependent oxygenase domain containing 2                           |
| -4.9 | 211887_x_at  | D | MSR1 (includes EG:20288) | macrophage scavenger receptor 1                                                           |
| -5.0 | 222049_s_at  | D | RBP4                     | retinol binding protein 4, plasma                                                         |
| -5.0 | 223492_s_at  |   | LRRFIP1                  | leucine rich repeat (in FLII) interacting protein 1                                       |
| -5.0 | 205827_at    |   | CCK                      | cholecystokinin                                                                           |
| -5.0 | 214622_at    |   | CYP21A2                  | cytochrome P450, family 21, subfamily A, polypeptide 2                                    |
| -5.0 | 213526_s_at  |   | LIN37                    | lin-37 homolog (C. elegans)                                                               |
| -5.0 | 201427_s_at  | D | SEPP1                    | selenoprotein P, plasma, 1                                                                |
| -5.0 | 1555889_a_at |   | CRTAP                    | cartilage associated protein                                                              |
| -5.0 | 228707_at    |   | CLDN23                   | claudin 23                                                                                |
| -5.0 | 212966_at    | D | HIC2                     | hypermethylated in cancer 2                                                               |
| -5.0 | 202150_s_at  |   | NEDD9                    | neural precursor cell expressed, developmentally down-regulated 9                         |
| -5.0 | 202764_at    |   | STIM1                    | stromal interaction molecule 1                                                            |
| -5.0 | 205620_at    |   | F10                      | coagulation factor X                                                                      |
| -5.0 | 207396_s_at  |   | ALG3                     | asparagine-linked glycosylation 3, alpha-1,3- mannosyltransferase homolog (S. cerevisiae) |
| -5.0 | 225757_s_at  | D | CLMN                     | calmin (calponin-like, transmembrane)                                                     |
| -5.0 | 209680_s_at  | D | KIFC1                    | kinesin family member C1                                                                  |
| -5.0 | 214858_at    |   | PP14571                  | uncharacterized LOC100130449                                                              |
| -5.0 | 208074_s_at  | D | AP2S1                    | adaptor-related protein complex 2, sigma 1 subunit                                        |
| -5.0 | 203592_s_at  |   | FSTL3                    | follistatin-like 3 (secreted glycoprotein)                                                |
| -5.1 | 205380_at    |   | PDZK1                    | PDZ domain containing 1                                                                   |
| -5.1 | 235797_x_at  |   | HMCN2                    | hemicentin 2                                                                              |
| -5.1 | 231259_s_at  | D | CCND2                    | cyclin D2                                                                                 |
| -5.1 | 203564_at    |   | FANCG                    | Fanconi anemia, complementation group G                                                   |
| -5.1 | 239028_at    |   | LYPD6                    | LY6/PLAUR domain containing 6                                                             |
| -5.1 | 202921_s_at  |   | ANK2                     | ankyrin 2, neuronal                                                                       |
| -5.1 | 212230_at    | D | PPAP2B                   | phosphatidic acid phosphatase type 2B                                                     |
| -5.1 | 207172_s_at  | D | CDH11                    | cadherin 11, type 2, OB-cadherin (osteoblast)                                             |
| -5.1 | 1552914_a_at |   | CD276                    | CD276 molecule                                                                            |
| -5.1 | 226314_at    |   | CHST14                   | carbohydrate (N-acetylgalactosamine 4-O) sulfotransferase 14                              |
| -5.2 | 203490_at    | D | ELF4                     | E74-like factor 4 (ets domain transcription factor)                                       |
| -5.2 | 212350_at    | D | TBC1D1                   | TBC1 (tre-2/USP6, BUB2, cdc16) domain family, member 1                                    |
| -5.2 | 31845_at     | D | ELF4                     | E74-like factor 4 (ets domain transcription factor)                                       |
| -5.2 | 214679_x_at  | D | GNA11                    | guanine nucleotide binding protein (G protein), alpha 11 (Gq class)                       |
| -5.2 | 204715_at    |   | PANX1                    | pannexin 1                                                                                |

Hui L, Wick HC, Edlow AG, Cowan JM, Bianchi DJW. Global gene expression analysis of term amniotic fluid cell-free fetal RNA *Obstet Gynecol* 2013;121.

The authors provided this information as a supplement to their article.

© Copyright 2013 American College of Obstetricians and Gynecologists.

|      |             |   |                                |                                                                                                            |
|------|-------------|---|--------------------------------|------------------------------------------------------------------------------------------------------------|
| -5.2 | 209569_x_at | D | D4S234E                        | DNA segment on chromosome 4 (unique)<br>234 expressed sequence                                             |
| -5.2 | 227599_at   |   | MB21D2                         | Mab-21 domain containing 2                                                                                 |
| -5.2 | 203507_at   |   | CD68                           | CD68 molecule                                                                                              |
| -5.2 | 221864_at   |   | ORAI3                          | ORAI calcium release-activated calcium<br>modulator 3                                                      |
| -5.2 | 201874_at   | D | MPZL1                          | myelin protein zero-like 1                                                                                 |
| -5.2 | 210347_s_at |   | BCL11A                         | B-cell CLL/lymphoma 11A (zinc finger<br>protein)                                                           |
| -5.2 | 232272_at   |   | ZNF624                         | zinc finger protein 624                                                                                    |
| -5.2 | 202685_s_at |   | AXL                            | AXL receptor tyrosine kinase                                                                               |
| -5.2 | 225673_at   | D | MYADM                          | myeloid-associated differentiation marker                                                                  |
| -5.2 | 213428_s_at |   | COL6A1                         | collagen, type VI, alpha 1                                                                                 |
| -5.2 | 224794_s_at |   | CERCAM                         | cerebral endothelial cell adhesion molecule<br>guanylate cyclase activator 2B<br>(uroguanylin)             |
| -5.3 | 207502_at   |   | GUCA2B                         |                                                                                                            |
| -5.3 | 218848_at   |   | THOC6                          | THO complex 6 homolog (Drosophila)<br>family with sequence similarity 213,<br>member B                     |
| -5.3 | 231835_at   |   | FAM213B                        |                                                                                                            |
| -5.3 | 220056_at   |   | IL22RA1                        | interleukin 22 receptor, alpha 1                                                                           |
| -5.3 | 219222_at   |   | RBKS                           | ribokinase                                                                                                 |
| -5.3 | 201765_s_at |   | HEXA                           | hexosaminidase A (alpha polypeptide)                                                                       |
| -5.3 | 221515_s_at |   | LCMT1                          | leucine carboxyl methyltransferase 1                                                                       |
| -5.3 | 205436_s_at | D | H2AFX                          | H2A histone family, member X                                                                               |
| -5.3 | 201601_x_at | D | IFITM1                         | interferon induced transmembrane protein<br>1                                                              |
| -5.3 | 201853_s_at |   | CDC25B                         | cell division cycle 25 homolog B (S.<br>pombe)                                                             |
| -5.3 | 202196_s_at |   | DKK3                           | dickkopf 3 homolog (Xenopus laevis)                                                                        |
| -5.3 | 207076_s_at |   | ASS1                           | argininosuccinate synthase 1                                                                               |
| -5.3 | 212233_at   | D | MAP1B                          | microtubule-associated protein 1B                                                                          |
| -5.4 | 222760_at   |   | ZNF703                         | zinc finger protein 703                                                                                    |
| -5.4 | 219956_at   |   | GALNT6                         | UDP-N-acetyl-alpha-D-<br>galactosamine: polypeptide N-<br>acetylgalactosaminyltransferase 6<br>(GalNAc-T6) |
| -5.4 | 201369_s_at | D | ZFP36L2                        | zinc finger protein 36, C3H type-like 2                                                                    |
| -5.4 | 214554_at   | D | HIST1H2AG (includes<br>others) | histone cluster 1, H2ag                                                                                    |
| -5.4 | 208821_at   |   | SNRPB                          | small nuclear ribonucleoprotein<br>polypeptides B and B1                                                   |
| -5.4 | 41858_at    | D | PGAP2                          | post-GPI attachment to proteins 2                                                                          |
| -5.4 | 209347_s_at | D | MAF                            | v-maf musculoaponeurotic fibrosarcoma<br>oncogene homolog (avian)                                          |
| -5.4 | 56197_at    | D | PLSCR3                         | phospholipid scramblase 3                                                                                  |
| -5.4 | 221234_s_at |   | BACH2                          | BTB and CNC homology 1, basic leucine<br>zipper transcription factor 2                                     |
| -5.4 | 202668_at   | D | EFNB2                          | ephrin-B2                                                                                                  |
| -5.4 | 216339_s_at | D | TNXB                           | tenascin XB                                                                                                |
| -5.5 | 204087_s_at |   | SLC5A6                         | solute carrier family 5 (sodium-dependent<br>vitamin transporter), member 6                                |
| -5.5 | 229657_at   | D | THRB                           | thyroid hormone receptor, beta                                                                             |
| -5.5 | 212525_s_at | D | H2AFX                          | H2A histone family, member X                                                                               |
| -5.5 | 51146_at    |   | PIGV                           | phosphatidylinositol glycan anchor<br>biosynthesis, class V                                                |
| -5.5 | 219416_at   | D | SCARA3                         | scavenger receptor class A, member 3                                                                       |

Hui L, Wick HC, Edlow AG, Cowan JM, Bianchi DJW. Global gene expression analysis of term amniotic fluid cell-free fetal RNA *Obstet Gynecol* 2013;121.

The authors provided this information as a supplement to their article.

© Copyright 2013 American College of Obstetricians and Gynecologists.

|      |             |   |                            |                                                                                               |
|------|-------------|---|----------------------------|-----------------------------------------------------------------------------------------------|
| -5.5 | 212021_s_at | D | MKI67                      | antigen identified by monoclonal antibody Ki-67                                               |
| -5.5 | 205141_at   |   | ANG                        | angiogenin, ribonuclease, RNase A family, 5                                                   |
| -5.6 | 210052_s_at |   | TPX2                       | TPX2, microtubule-associated, homolog (Xenopus laevis)                                        |
| -5.6 | 44702_at    | D | SYDE1                      | synapse defective 1, Rho GTPase, homolog 1 (C. elegans)                                       |
| -5.6 | 206122_at   |   | SOX15                      | SRY (sex determining region Y)-box 15                                                         |
| -5.6 | 242502_at   | D | KCNH5                      | potassium voltage-gated channel, subfamily H (eag-related), member 5                          |
| -5.6 | 212090_at   |   | GRINA                      | glutamate receptor, ionotropic, N-methyl D-aspartate-associated protein 1 (glutamate binding) |
| -5.6 | 217487_x_at |   | FOLH1                      | folate hydrolase (prostate-specific membrane antigen) 1                                       |
| -5.6 | 205028_at   |   | TRO                        | trophinin                                                                                     |
| -5.6 | 231118_at   |   | ANKRD35                    | ankyrin repeat domain 35                                                                      |
| -5.6 | 223168_at   | D | RHOU                       | ras homolog family member U                                                                   |
| -5.6 | 230525_at   |   | LOC100507378               | uncharacterized LOC100507378                                                                  |
| -5.6 | 204617_s_at |   | ACD                        | adrenocortical dysplasia homolog (mouse)                                                      |
| -5.6 | 205241_at   |   | SCO2 (includes EG:606683)  | SCO cytochrome oxidase deficient homolog 2 (yeast)                                            |
| -5.6 | 243582_at   | D | SH3RF2                     | SH3 domain containing ring finger 2                                                           |
| -5.7 | 207880_at   | D | ADAM11                     | ADAM metalloproteinase domain 11                                                              |
| -5.7 | 224947_at   |   | RNF26                      | ring finger protein 26                                                                        |
| -5.7 | 208577_at   | D | HIST1H3A (includes others) | histone cluster 1, H3a                                                                        |
| -5.7 | 214022_s_at | D | IFITM1                     | interferon induced transmembrane protein 1                                                    |
| -5.7 | 215194_at   |   | PRKCA                      | protein kinase C, alpha                                                                       |
| -5.7 | 209603_at   |   | GATA3                      | GATA binding protein 3                                                                        |
| -5.7 | 236036_at   |   | LOC100506343               | uncharacterized LOC100506343                                                                  |
| -5.7 | 204654_s_at |   | TFAP2A                     | transcription factor AP-2 alpha (activating enhancer binding protein 2 alpha)                 |
| -5.7 | 218084_x_at | D | FXVD5                      | FXVD domain containing ion transport regulator 5                                              |
| -5.7 | 213316_at   | D | KIAA1462                   | KIAA1462                                                                                      |
| -5.7 | 228729_at   |   | CCNB1                      | cyclin B1                                                                                     |
| -5.8 | 237403_at   |   | GFI1B                      | growth factor independent 1B transcription repressor                                          |
| -5.8 | 201565_s_at | D | ID2                        | inhibitor of DNA binding 2, dominant negative helix-loop-helix protein                        |
| -5.8 | 218532_s_at |   | FAM134B                    | family with sequence similarity 134, member B                                                 |
| -5.8 | 209764_at   |   | MGAT3                      | mannosyl (beta-1,4-)-glycoprotein beta-1,4-N-acetylglucosaminyltransferase                    |
| -5.8 | 201433_s_at |   | PTDSS1                     | phosphatidylserine synthase 1                                                                 |
| -5.8 | 227705_at   |   | TCEAL7                     | transcription elongation factor A (SII)-like 7                                                |
| -5.8 | 1555826_at  | D | BIRC5                      | baculoviral IAP repeat containing 5                                                           |
| -5.8 | 207254_at   |   | SLC15A1                    | solute carrier family 15 (oligopeptide transporter), member 1                                 |
| -5.8 | 223094_s_at | D | ANKH                       | ankylosis, progressive homolog (mouse)                                                        |
| -5.8 | 210087_s_at | D | MPZL1                      | myelin protein zero-like 1                                                                    |

Hui L, Wick HC, Edlow AG, Cowan JM, Bianchi DJW. Global gene expression analysis of term amniotic fluid cell-free fetal RNA *Obstet Gynecol* 2013;121.

The authors provided this information as a supplement to their article.

© Copyright 2013 American College of Obstetricians and Gynecologists.



|      |              |   |           |                                                                                                                  |
|------|--------------|---|-----------|------------------------------------------------------------------------------------------------------------------|
| -5.8 | 209179_s_at  |   | MBOAT7    | membrane bound O-acyltransferase domain containing 7                                                             |
| -5.8 | 230544_at    |   | RPS6KA4   | ribosomal protein S6 kinase, 90kDa, polypeptide 4                                                                |
| -5.8 | 211171_s_at  |   | PDE10A    | phosphodiesterase 10A                                                                                            |
| -5.8 | 215707_s_at  |   | PRNP      | prion protein                                                                                                    |
| -5.9 | 208474_at    | D | CLDN6     | claudin 6                                                                                                        |
| -5.9 | 1554945_x_at | D | VIL1      | villin 1                                                                                                         |
| -5.9 | 213767_at    | D | KSR1      | kinase suppressor of ras 1                                                                                       |
| -5.9 | 226502_at    |   | ELMOD2    | ELMO/CED-12 domain containing 2                                                                                  |
| -5.9 | 235930_at    |   | KCNMB4    | potassium large conductance calcium-activated channel, subfamily M, beta member 4                                |
| -5.9 | 231737_at    | D | CACNG4    | calcium channel, voltage-dependent, gamma subunit 4                                                              |
| -5.9 | 209035_at    |   | MDK       | midkine (neurite growth-promoting factor 2)                                                                      |
| -5.9 | 212949_at    |   | NCAPH     | non-SMC condensin I complex, subunit H                                                                           |
| -5.9 | 227463_at    |   | ACE       | angiotensin I converting enzyme (peptidyl-dipeptidase A) 1                                                       |
| -5.9 | 214423_x_at  | D | ALDOB     | aldolase B, fructose-bisphosphate                                                                                |
| -5.9 | 219194_at    |   | SEMA4G    | sema domain, immunoglobulin domain (Ig), transmembrane domain (TM) and short cytoplasmic domain, (semaphorin) 4G |
| -5.9 | 202910_s_at  |   | CD97      | CD97 molecule                                                                                                    |
| -5.9 | 220157_x_at  |   | PLEKHA8P1 | pleckstrin homology domain containing, family A member 8 pseudogene 1                                            |
| -6.0 | 244623_at    |   | KCNQ5     | potassium voltage-gated channel, KQT-like subfamily, member 5                                                    |
| -6.0 | 212012_at    | D | PXDN      | peroxidasin homolog (Drosophila)                                                                                 |
| -6.0 | 203820_s_at  | D | IGF2BP3   | insulin-like growth factor 2 mRNA binding protein 3                                                              |
| -6.0 | 208916_at    | D | SLC1A5    | solute carrier family 1 (neutral amino acid transporter), member 5                                               |
| -6.0 | 226506_at    | D | THSD4     | thrombospondin, type I, domain containing 4                                                                      |
| -6.0 | 201617_x_at  | D | CALD1     | caldesmon 1                                                                                                      |
| -6.0 | 202766_s_at  | D | FBN1      | fibrillin 1                                                                                                      |
| -6.0 | 225285_at    | D | BCAT1     | branched chain amino-acid transaminase 1, cytosolic                                                              |
| -6.0 | 230259_at    |   | C10orf125 | chromosome 10 open reading frame 125                                                                             |
| -6.0 | 205341_at    | D | EHD2      | EH-domain containing 2                                                                                           |
| -6.1 | 229050_s_at  |   | SNHG7     | small nucleolar RNA host gene 7 (non-protein coding)                                                             |
| -6.1 | 229096_at    |   | LOC440895 | two pore channel 3 pseudogene                                                                                    |
| -6.1 | 226456_at    |   | RMI2      | RMI2, RecQ mediated genome instability 2, homolog (S. cerevisiae)                                                |
| -6.1 | 215346_at    |   | CD40      | CD40 molecule, TNF receptor superfamily member 5                                                                 |
| -6.1 | 1555304_a_at | D | KCNH5     | potassium voltage-gated channel, subfamily H (eag-related), member 5                                             |
| -6.1 | 206300_s_at  |   | PTH1H     | parathyroid hormone-like hormone                                                                                 |
| -6.1 | 224169_at    |   | NPF22     | neuropeptide FF receptor 2                                                                                       |
| -6.1 | 230369_at    |   | GPR161    | G protein-coupled receptor 161                                                                                   |
| -6.1 | 1562640_at   |   | HOXA-AS2  | HOXA cluster antisense RNA 2 (non-protein coding)                                                                |

Hui L, Wick HC, Edlow AG, Cowan JM, Bianchi DJW. Global gene expression analysis of term amniotic fluid cell-free fetal RNA *Obstet Gynecol* 2013;121.

The authors provided this information as a supplement to their article.

© Copyright 2013 American College of Obstetricians and Gynecologists.

|      |              |   |                            |                                                                             |
|------|--------------|---|----------------------------|-----------------------------------------------------------------------------|
| -6.1 | 229296_at    |   | LOC100506119               | uncharacterized LOC100506119                                                |
| -6.1 | 206518_s_at  |   | RGS9                       | regulator of G-protein signaling 9                                          |
| -6.1 | 210367_s_at  | D | PTGES                      | prostaglandin E synthase                                                    |
| -6.1 | 230084_at    |   | SLC30A2                    | solute carrier family 30 (zinc transporter), member 2                       |
| -6.2 | 206388_at    | D | PDE3A                      | phosphodiesterase 3A, cGMP-inhibited                                        |
| -6.2 | 214451_at    |   | TFAP2B                     | transcription factor AP-2 beta (activating enhancer binding protein 2 beta) |
| -6.2 | 219113_x_at  | D | HSD17B14                   | hydroxysteroid (17-beta) dehydrogenase 14                                   |
| -6.2 | 202229_s_at  |   | CHERP                      | calcium homeostasis endoplasmic reticulum protein                           |
| -6.2 | 203192_at    |   | ABCB6                      | ATP-binding cassette, sub-family B (MDR/TAP), member 6                      |
| -6.2 | 202369_s_at  |   | TRAM2                      | translocation associated membrane protein 2                                 |
| -6.2 | 213358_at    |   | SOGA2                      | SOGA family member 2                                                        |
| -6.2 | 205006_s_at  |   | NMT2                       | N-myristoyltransferase 2                                                    |
| -6.2 | 224733_at    |   | CMTM3                      | CKLF-like MARVEL transmembrane domain containing 3                          |
| -6.3 | 213633_at    |   | SH3BP1                     | SH3-domain binding protein 1                                                |
| -6.3 | 224753_at    |   | CDC45                      | cell division cycle associated 5                                            |
| -6.3 | 234673_at    | D | HHLA2                      | HERV-H LTR-associating 2                                                    |
| -6.3 | 224494_x_at  | D | HSD17B14                   | hydroxysteroid (17-beta) dehydrogenase 14                                   |
| -6.4 | 221701_s_at  |   | STRA6                      | stimulated by retinoic acid gene 6 homolog (mouse)                          |
| -6.4 | 217207_s_at  |   | BTNL3                      | butyrophilin-like 3                                                         |
| -6.4 | 205874_at    |   | ITPKA                      | inositol-trisphosphate 3-kinase A                                           |
| -6.4 | 227399_at    |   | VGLL3                      | vestigial like 3 (Drosophila)                                               |
| -6.4 | 219046_s_at  | D | PKNOX2                     | PBX/knotted 1 homeobox 2                                                    |
| -6.4 | 219738_s_at  |   | PCDH9                      | protocadherin 9                                                             |
| -6.4 | 213930_at    |   | ATG12 (includes EG:361321) | ATG12 autophagy related 12 homolog (S. cerevisiae)                          |
| -6.4 | 223093_at    | D | ANKH                       | ankylosis, progressive homolog (mouse)                                      |
| -6.4 | 214264_s_at  |   | EFCAB11                    | EF-hand calcium binding domain 11                                           |
| -6.4 | 207439_s_at  |   | SLC35A2                    | solute carrier family 35 (UDP-galactose transporter), member A2             |
| -6.4 | 201847_at    |   | LIPA                       | lipase A, lysosomal acid, cholesterol esterase                              |
| -6.5 | 201505_at    | D | LAMB1                      | laminin, beta 1                                                             |
| -6.5 | 227971_at    |   | NRK                        | Nik related kinase                                                          |
| -6.5 | 212077_at    | D | CALD1                      | caldesmon 1                                                                 |
| -6.5 | 205301_s_at  | D | OGG1                       | 8-oxoguanine DNA glycosylase                                                |
| -6.5 | 214175_x_at  | D | PDLIM4                     | PDZ and LIM domain 4                                                        |
| -6.5 | 204457_s_at  |   | GAS1 (includes EG:14451)   | growth arrest-specific 1                                                    |
| -6.5 | 33197_at     |   | MYO7A                      | myosin VIIA                                                                 |
| -6.5 | 209260_at    | D | SFN                        | stratifin                                                                   |
| -6.5 | 1555338_s_at |   | AQP10                      | aquaporin 10                                                                |
| -6.6 | 238956_at    | D | EFNA2                      | ephrin-A2                                                                   |
| -6.6 | 220196_at    |   | MUC16                      | mucin 16, cell surface associated                                           |
| -6.6 | 203633_at    |   | CPT1A                      | carnitine palmitoyltransferase 1A (liver)                                   |
| -6.6 | 1553573_s_at | D | EFNA2                      | ephrin-A2                                                                   |
| -6.6 | 218828_at    | D | PLSCR3                     | phospholipid scramblase 3                                                   |
| -6.6 | 238587_at    | D | UBASH3B                    | ubiquitin associated and SH3 domain containing B                            |

Hui L, Wick HC, Edlow AG, Cowan JM, Bianchi DJW. Global gene expression analysis of term amniotic fluid cell-free fetal RNA *Obstet Gynecol* 2013;121.

The authors provided this information as a supplement to their article.

© Copyright 2013 American College of Obstetricians and Gynecologists.

|      |              |   |                          |                                                                                                             |
|------|--------------|---|--------------------------|-------------------------------------------------------------------------------------------------------------|
| -6.6 | 222835_at    | D | THSD4                    | thrombospondin, type I, domain containing 4                                                                 |
| -6.6 | 220604_x_at  |   | FTCD                     | formiminotransferase cyclodeaminase                                                                         |
| -6.6 | 212198_s_at  |   | TM9SF4                   | transmembrane 9 superfamily protein member 4                                                                |
| -6.6 | 204988_at    | D | FGB (includes EG:110135) | fibrinogen beta chain                                                                                       |
| -6.6 | 236415_at    |   | DENND5B                  | DENN/MADD domain containing 5B                                                                              |
| -6.6 | 209381_x_at  | D | SF3A2                    | splicing factor 3a, subunit 2, 66kDa                                                                        |
| -6.6 | 214276_at    | D | KLF12                    | Kruppel-like factor 12                                                                                      |
| -6.6 | 219918_s_at  | D | ASPM                     | asp (abnormal spindle) homolog, microcephaly associated (Drosophila)                                        |
| -6.6 | 208782_at    |   | FSTL1                    | folliculin-like 1                                                                                           |
| -6.7 | 219576_at    |   | MAP7D3                   | MAP7 domain containing 3                                                                                    |
| -6.7 | 213533_at    | D | D4S234E                  | DNA segment on chromosome 4 (unique) 234 expressed sequence                                                 |
| -6.7 | 238364_x_at  |   | GLI4                     | GLI family zinc finger 4                                                                                    |
| -6.7 | 228882_at    |   | TUB                      | tubby homolog (mouse)                                                                                       |
| -6.7 | 221188_s_at  |   | CIDEB                    | cell death-inducing DFFA-like effector b                                                                    |
| -6.7 | 204981_at    |   | SLC22A18                 | solute carrier family 22, member 18                                                                         |
| -6.7 | 202765_s_at  | D | FBN1                     | fibrillin 1                                                                                                 |
| -6.7 | 224252_s_at  | D | FXYD5                    | FXYD domain containing ion transport regulator 5                                                            |
| -6.8 | 224501_at    |   | C1orf170                 | chromosome 1 open reading frame 170                                                                         |
| -6.8 | 219398_at    |   | CIDEC                    | cell death-inducing DFFA-like effector c                                                                    |
| -6.8 | 200952_s_at  | D | CCND2                    | cyclin D2                                                                                                   |
| -6.8 | 232015_at    |   | FAM59B                   | family with sequence similarity 59, member B                                                                |
| -6.8 | 221042_s_at  | D | CLMN                     | calmin (calponin-like, transmembrane)                                                                       |
| -6.8 | 1557907_x_at | D | MUC12                    | mucin 12, cell surface associated                                                                           |
| -6.8 | 227681_at    | D | ZFP36L2                  | zinc finger protein 36, C3H type-like 2                                                                     |
| -6.8 | 201896_s_at  |   | PSRC1                    | proline/serine-rich coiled-coil 1                                                                           |
| -6.8 | 204043_at    |   | TCN2                     | transcobalamin II                                                                                           |
| -6.8 | 220135_s_at  |   | SLC7A9                   | solute carrier family 7 (glycoprotein-associated amino acid transporter light chain, bo,+ system), member 9 |
| -6.8 | 244676_s_at  | D | MTUS2                    | microtubule associated tumor suppressor candidate 2                                                         |
| -6.8 | 231411_at    | D | LHFP                     | lipoma HMGIC fusion partner                                                                                 |
| -6.8 | 220994_s_at  | D | STXBP6                   | syntaxin binding protein 6 (amisyn)                                                                         |
| -6.8 | 218612_s_at  |   | TSSC4                    | tumor suppressing subtransferable candidate 4                                                               |
| -6.9 | 207226_at    |   | HIST1H2BN                | histone cluster 1, H2bn                                                                                     |
| -6.9 | 227320_at    |   | FAM101A                  | family with sequence similarity 101, member A                                                               |
| -6.9 | 224171_at    |   | LSM14B                   | LSM14B, SCD6 homolog B (S. cerevisiae)                                                                      |
| -6.9 | 213506_at    |   | F2RL1                    | coagulation factor II (thrombin) receptor-like 1                                                            |
| -6.9 | 205093_at    |   | PLEKHA6                  | pleckstrin homology domain containing, family A member 6                                                    |
| -6.9 | 212486_s_at  | D | FYN                      | FYN oncogene related to SRC, FGR, YES                                                                       |
| -6.9 | 227882_at    |   | FKRP                     | fukutin related protein                                                                                     |
| -6.9 | 228713_s_at  | D | HSD17B14                 | hydroxysteroid (17-beta) dehydrogenase 14                                                                   |
| -6.9 | 203706_s_at  |   | FZD7                     | frizzled family receptor 7                                                                                  |
| -7.0 | 229382_at    |   | FAM212B                  | family with sequence similarity 212, member B                                                               |

Hui L, Wick HC, Edlow AG, Cowan JM, Bianchi DJW. Global gene expression analysis of term amniotic fluid cell-free fetal RNA *Obstet Gynecol* 2013;121.

The authors provided this information as a supplement to their article.

© Copyright 2013 American College of Obstetricians and Gynecologists.

|      |              |   |              |                                                                                     |
|------|--------------|---|--------------|-------------------------------------------------------------------------------------|
| -7.0 | 219828_at    |   | C9orf86      | chromosome 9 open reading frame 86                                                  |
| -7.0 | 206410_at    |   | NROB2        | nuclear receptor subfamily 0, group B, member 2                                     |
| -7.0 | 203268_s_at  |   | DRG2         | developmentally regulated GTP binding protein 2                                     |
| -7.1 | 205211_s_at  |   | RIN1         | Ras and Rab interactor 1                                                            |
| -7.2 | 1558330_x_at |   | TONSL        | tonsoku-like, DNA repair protein                                                    |
| -7.2 | 212658_at    |   | LHFPL2       | lipoma HMGIC fusion partner-like 2                                                  |
| -7.2 | 201195_s_at  |   | SLC7A5       | solute carrier family 7 (amino acid transporter light chain, L system), member 5    |
| -7.2 | 205265_s_at  |   | SPEG         | SPEG complex locus                                                                  |
| -7.2 | 228381_at    |   | LOC100287628 | uncharacterized LOC100287628                                                        |
| -7.3 | 202665_s_at  | D | WIPF1        | WAS/WASL interacting protein family, member 1                                       |
| -7.3 | 229538_s_at  |   | IQGAP3       | IQ motif containing GTPase activating protein 3                                     |
| -7.3 | 203920_at    |   | NR1H3        | nuclear receptor subfamily 1, group H, member 3                                     |
| -7.3 | 1555058_a_at | D | LPGAT1       | lysophosphatidylglycerol acyltransferase 1                                          |
| -7.3 | 213874_at    |   | SERPINA4     | serpin peptidase inhibitor, clade A (alpha-1 antiproteinase, antitrypsin), member 4 |
| -7.3 | 202589_at    | D | TYMS         | thymidylate synthetase                                                              |
| -7.3 | 207524_at    |   | ST7          | suppression of tumorigenicity 7                                                     |
| -7.3 | 210174_at    |   | NR5A2        | nuclear receptor subfamily 5, group A, member 2                                     |
| -7.3 | 214452_at    | D | BCAT1        | branched chain amino-acid transaminase 1, cytosolic                                 |
| -7.4 | 214307_at    |   | HGD          | homogentisate 1,2-dioxygenase                                                       |
| -7.4 | 223571_at    | D | C1QTNF6      | C1q and tumor necrosis factor related protein 6                                     |
| -7.4 | 213880_at    |   | LGR5         | leucine-rich repeat containing G protein-coupled receptor 5                         |
| -7.4 | 202834_at    |   | AGT          | angiotensinogen (serpin peptidase inhibitor, clade A, member 8)                     |
| -7.4 | 204026_s_at  |   | ZWINT        | ZW10 interactor                                                                     |
| -7.4 | 221908_at    |   | RNF2         | ring finger protein, transmembrane 2                                                |
| -7.4 | 221980_at    | D | EMILIN2      | elastin microfibril interfacier 2                                                   |
| -7.4 | 235431_s_at  |   | PELI3        | pellino E3 ubiquitin protein ligase family member 3                                 |
| -7.5 | 208131_s_at  |   | PTGIS        | prostaglandin I2 (prostacyclin) synthase                                            |
| -7.5 | 219153_s_at  | D | THSD4        | thrombospondin, type 1, domain containing 4                                         |
| -7.5 | 235077_at    | D | MEG3         | maternally expressed 3 (non-protein coding)                                         |
| -7.5 | 209189_at    |   | FOS          | FBJ murine osteosarcoma viral oncogene homolog                                      |
| -7.5 | 229215_at    |   | ASCL2        | achaete-scute complex homolog 2 (Drosophila)                                        |
| -7.6 | 235545_at    |   | DEPDC1       | DEP domain containing 1                                                             |
| -7.6 | 225596_at    |   | KLC4         | kinesin light chain 4                                                               |
| -7.6 | 1557129_a_at |   | FAM111B      | family with sequence similarity 111, member B                                       |
| -7.6 | 227735_s_at  | D | C10orf99     | chromosome 10 open reading frame 99                                                 |
| -7.6 | 221609_s_at  | D | WNT6         | wingless-type MMTV integration site family, member 6                                |
| -7.7 | 220162_s_at  |   | CARD9        | caspase recruitment domain family, member 9                                         |
| -7.7 | 224486_s_at  | D | C15orf41     | chromosome 15 open reading frame 41                                                 |

Hui L, Wick HC, Edlow AG, Cowan JM, Bianchi DJW. Global gene expression analysis of term amniotic fluid cell-free fetal RNA *Obstet Gynecol* 2013;121.

The authors provided this information as a supplement to their article.

© Copyright 2013 American College of Obstetricians and Gynecologists.

|      |             |   |                          |                                                                                                   |
|------|-------------|---|--------------------------|---------------------------------------------------------------------------------------------------|
| -7.7 | 230647_at   |   | TMEM53                   | transmembrane protein 53                                                                          |
| -7.7 | 225242_s_at | D | CCDC80                   | coiled-coil domain containing 80                                                                  |
| -7.7 | 212977_at   |   | CXCR7                    | chemokine (C-X-C motif) receptor 7                                                                |
| -7.7 | 202145_at   |   | LY6E                     | lymphocyte antigen 6 complex, locus E                                                             |
| -7.8 | 219796_s_at | D | CDHR5                    | cadherin-related family member 5                                                                  |
| -7.8 | 224579_at   | D | SLC38A1                  | solute carrier family 38, member 1                                                                |
| -7.8 | 1557906_at  | D | MUC12                    | mucin 12, cell surface associated                                                                 |
| -7.9 | 222078_at   | D | PKLR                     | pyruvate kinase, liver and RBC                                                                    |
| -7.9 | 222940_at   | D | SULT1E1                  | sulfotransferase family 1E, estrogen-preferring, member 1                                         |
| -7.9 | 219168_s_at | D | PRR5                     | proline rich 5 (renal)                                                                            |
| -7.9 | 224610_at   |   | SNHG1                    | small nucleolar RNA host gene 1 (non-protein coding)                                              |
| -7.9 | 215116_s_at |   | DNM1                     | dynamain 1                                                                                        |
| -7.9 | 233993_at   |   | MUC3                     | intestinal mucin-like                                                                             |
| -7.9 | 202002_at   |   | ACAA2                    | acetyl-CoA acyltransferase 2                                                                      |
| -8.0 | 202748_at   |   | GBP2 (includes EG:14469) | guanylate binding protein 2, interferon-inducible                                                 |
| -8.0 | 216568_x_at |   | ALAS2                    | aminolevulinate, delta-, synthase 2                                                               |
| -8.0 | 223757_at   | D | DIO3OS                   | DIO3 opposite strand/antisense RNA (non-protein coding)                                           |
| -8.0 | 201291_s_at |   | TOP2A                    | topoisomerase (DNA) II alpha 170kDa                                                               |
| -8.0 | 231982_at   |   | C19orf77                 | chromosome 19 open reading frame 77                                                               |
| -8.0 | 243779_at   | D | GALNT13                  | UDP-N-acetyl-alpha-D-galactosamine: polypeptide N-acetylgalactosaminyltransferase 13 (GalNAc-T13) |
| -8.0 | 212865_s_at |   | COL14A1                  | collagen, type XIV, alpha 1                                                                       |
| -8.1 | 238462_at   | D | UBASH3B                  | ubiquitin associated and SH3 domain containing B                                                  |
| -8.1 | 210121_at   |   | B3GALT2                  | UDP-Gal:betaGlcNAc beta 1,3-galactosyltransferase, polypeptide 2                                  |
| -8.1 | 224497_x_at | D | HSD17B14                 | hydroxysteroid (17-beta) dehydrogenase 14                                                         |
| -8.1 | 227958_s_at |   | GSN                      | gelsolin                                                                                          |
| -8.1 | 1558210_at  | D | SRC                      | v-src sarcoma (Schmidt-Ruppin A-2) viral oncogene homolog (avian)                                 |
| -8.1 | 201367_s_at | D | ZFP36L2                  | zinc finger protein 36, C3H type-like 2                                                           |
| -8.1 | 229183_at   | D | KCTD1                    | potassium channel tetramerisation domain containing 1                                             |
| -8.1 | 223095_at   |   | MARVELD1                 | MARVEL domain containing 1                                                                        |
| -8.1 | 230644_at   |   | LRFN5                    | leucine rich repeat and fibronectin type III domain containing 5                                  |
| -8.1 | 235911_at   | D | MFI2                     | antigen p97 (melanoma associated) identified by monoclonal antibodies 133.2 and 96.5              |
| -8.2 | 226824_at   | D | CPXM2                    | carboxypeptidase X (M14 family), member 2                                                         |
| -8.2 | 203851_at   |   | IGFBP6                   | insulin-like growth factor binding protein 6                                                      |
| -8.2 | 204997_at   | D | GPD1                     | glycerol-3-phosphate dehydrogenase 1 (soluble)                                                    |
| -8.2 | 47069_at    | D | PRR5                     | proline rich 5 (renal)                                                                            |
| -8.2 | 201250_s_at | D | SLC2A1                   | solute carrier family 2 (facilitated glucose transporter), member 1                               |
| -8.2 | 201466_s_at | D | JUN                      | jun proto-oncogene                                                                                |
| -8.3 | 222881_at   |   | HPSE                     | heparanase                                                                                        |
| -8.3 | 210475_at   | D | POU3F1                   | POU class 3 homeobox 1                                                                            |

Hui L, Wick HC, Edlow AG, Cowan JM, Bianchi DJW. Global gene expression analysis of term amniotic fluid cell-free fetal RNA *Obstet Gynecol* 2013;121.

The authors provided this information as a supplement to their article.

© Copyright 2013 American College of Obstetricians and Gynecologists.

|      |              |   |           |                                                                        |
|------|--------------|---|-----------|------------------------------------------------------------------------|
| -8.3 | 217054_at    | D | MUC3A     | mucin 3A, cell surface associated                                      |
| -8.3 | 207828_s_at  |   | CENPF     | centromere protein F, 350/400kDa (mitosin)                             |
| -8.3 | 227819_at    |   | LGR6      | leucine-rich repeat containing G protein-coupled receptor 6            |
| -8.4 | 218542_at    |   | CEP55     | centrosomal protein 55kDa                                              |
| -8.4 | 221565_s_at  |   | CALHM2    | calcium homeostasis modulator 2                                        |
| -8.4 | 231842_at    | D | KIAA1462  | KIAA1462                                                               |
| -8.4 | 209570_s_at  | D | D4S234E   | DNA segment on chromosome 4 (unique) 234 expressed sequence            |
| -8.5 | 205555_s_at  |   | MSX2      | msh homeobox 2                                                         |
| -8.5 | 228733_at    |   | PUSL1     | pseudouridylyl synthase-like 1                                         |
| -8.5 | 227420_at    |   | TNFAIP8L1 | tumor necrosis factor, alpha-induced protein 8-like 1                  |
| -8.6 | 241574_s_at  |   | IGF2BP1   | insulin-like growth factor 2 mRNA binding protein 1                    |
| -8.6 | 1559266_s_at |   | C10orf140 | chromosome 10 open reading frame 140                                   |
| -8.6 | 218039_at    |   | NUSAP1    | nucleolar and spindle associated protein 1                             |
| -8.6 | 202236_s_at  |   | SLC16A1   | solute carrier family 16, member 1 (monocarboxylic acid transporter 1) |
| -8.7 | 220108_at    |   | GNA14     | guanine nucleotide binding protein (G protein), alpha 14               |
| -8.7 | 202350_s_at  |   | MATN2     | matrilin 2                                                             |
| -8.8 | 1565772_at   | D | PAK1      | p21 protein (Cdc42/Rac)-activated kinase 1                             |
| -8.8 | 213139_at    |   | SNAI2     | snail homolog 2 (Drosophila)                                           |
| -8.8 | 230238_at    |   | SOWAHA    | soosondowah ankyrin repeat domain family member A                      |
| -8.8 | 214457_at    | D | HOXA2     | homeobox A2                                                            |
| -8.8 | 226597_at    |   | REEP6     | receptor accessory protein 6                                           |
| -8.9 | 210105_s_at  | D | FYN       | FYN oncogene related to SRC, FGR, YES                                  |
| -8.9 | 217238_s_at  | D | ALDOB     | aldolase B, fructose-bisphosphate                                      |
| -8.9 | 234361_at    |   | CREB3L3   | cAMP responsive element binding protein 3-like 3                       |
| -8.9 | 229281_at    |   | NPAS3     | neuronal PAS domain protein 3                                          |
| -8.9 | 212123_at    | D | TCTN3     | tectonic family member 3                                               |
| -9.0 | 219543_at    | D | PBLD      | phenazine biosynthesis-like protein domain containing                  |
| -9.0 | 203382_s_at  | D | APOE      | apolipoprotein E                                                       |
| -9.0 | 222039_at    |   | KIF18B    | kinesin family member 18B                                              |
| -9.0 | 226961_at    |   | PRR15     | proline rich 15                                                        |
| -9.1 | 218756_s_at  |   | DHRS11    | dehydrogenase/reductase (SDR family) member 11                         |
| -9.1 | 1564960_at   |   | KRTAP7-1  | keratin associated protein 7-1 (gene/pseudogene)                       |
| -9.1 | 235904_at    |   | UGT3A1    | UDP glycosyltransferase 3 family, polypeptide A1                       |
| -9.1 | 207158_at    |   | APOBEC1   | apolipoprotein B mRNA editing enzyme, catalytic polypeptide 1          |
| -9.1 | 212020_s_at  | D | MK167     | antigen identified by monoclonal antibody Ki-67                        |
| -9.1 | 228868_x_at  |   | CDT1      | chromatin licensing and DNA replication factor 1                       |
| -9.1 | 228580_at    | D | HTRA3     | HtrA serine peptidase 3                                                |
| -9.1 | 231420_at    |   | GGN       | gametogenetin                                                          |
| -9.2 | 226659_at    |   | DEF6      | differentially expressed in FDCP 6 homolog (mouse)                     |

Hui L, Wick HC, Edlow AG, Cowan JM, Bianchi DJW. Global gene expression analysis of term amniotic fluid cell-free fetal RNA *Obstet Gynecol* 2013;121.

The authors provided this information as a supplement to their article.

© Copyright 2013 American College of Obstetricians and Gynecologists.

|       |              |   |                             |                                                                                                           |
|-------|--------------|---|-----------------------------|-----------------------------------------------------------------------------------------------------------|
| -9.2  | 225025_at    |   | IGSF8                       | immunoglobulin superfamily, member 8                                                                      |
| -9.2  | 218541_s_at  |   | C8orf4                      | chromosome 8 open reading frame 4                                                                         |
| -9.2  | 209215_at    |   | MFSD10                      | major facilitator superfamily domain containing 10                                                        |
| -9.2  | 201875_s_at  | D | MPZL1                       | myelin protein zero-like 1                                                                                |
| -9.2  | 203417_at    |   | MFAP2                       | microfibrillar-associated protein 2                                                                       |
| -9.2  | 1566513_a_at | D | GNG4                        | guanine nucleotide binding protein (G protein), gamma 4                                                   |
| -9.2  | 220193_at    |   | SH3D21                      | SH3 domain containing 21                                                                                  |
| -9.2  | 218656_s_at  | D | LHFP                        | lipoma HMGIC fusion partner                                                                               |
| -9.3  | 229596_at    |   | AMDHD1                      | amidohydrolase domain containing 1                                                                        |
| -9.3  | 213706_at    | D | GPD1                        | glycerol-3-phosphate dehydrogenase 1 (soluble)                                                            |
| -9.3  | 1554696_s_at | D | TYMS                        | thymidylate synthetase                                                                                    |
| -9.3  | 203418_at    | D | CCNA2                       | cyclin A2                                                                                                 |
| -9.3  | 228293_at    |   | DEPDC7                      | DEP domain containing 7                                                                                   |
| -9.4  | 220115_s_at  |   | CDH10                       | cadherin 10, type 2 (T2-cadherin)                                                                         |
| -9.4  | 1555922_at   | D | C10orf114                   | chromosome 10 open reading frame 114                                                                      |
| -9.4  | 232481_s_at  |   | SLITRK6                     | SLIT and NTRK-like family, member 6                                                                       |
| -9.4  | 238197_at    | D | GATA5                       | GATA binding protein 5                                                                                    |
| -9.4  | 231424_at    | D | SLC5A12                     | solute carrier family 5 (sodium/glucose cotransporter), member 12                                         |
| -9.4  | 206033_s_at  | D | DSC3 (includes EG: 13507)   | desmocollin 3                                                                                             |
| -9.5  | 207156_at    | D | HIST1H2AG (includes others) | histone cluster 1, H2ag                                                                                   |
| -9.6  | 219319_at    | D | HIF3A                       | hypoxia inducible factor 3, alpha subunit                                                                 |
| -9.6  | 205374_at    |   | SLN                         | sarcolipin                                                                                                |
| -9.6  | 201539_s_at  | D | FHL1 (includes EG: 14199)   | four and a half LIM domains 1                                                                             |
| -9.6  | 202664_at    | D | WIPF1                       | WAS/WASL interacting protein family, member 1                                                             |
| -9.6  | 214639_s_at  |   | HOXA1                       | homeobox A1                                                                                               |
| -9.6  | 210677_at    |   | SOAT2                       | sterol O-acyltransferase 2                                                                                |
| -9.7  | 217117_x_at  | D | MUC3A                       | mucin 3A, cell surface associated                                                                         |
| -9.7  | 226311_at    | D | ADAMTS2                     | ADAM metalloproteinase with thrombospondin type 1 motif, 2                                                |
| -9.7  | 237858_s_at  | D | MTUS2                       | microtubule associated tumor suppressor candidate 2                                                       |
| -9.7  | 213368_x_at  |   | PPFIA3                      | protein tyrosine phosphatase, receptor type, f polypeptide (PTPRF), interacting protein (liprin), alpha 3 |
| -9.8  | 208576_s_at  | D | HIST1H3A (includes others)  | histone cluster 1, H3a                                                                                    |
| -9.8  | 213425_at    | D | WNT5A                       | wingless-type MMTV integration site family, member 5A                                                     |
| -9.9  | 1555694_a_at |   | KCNIP3                      | Kv channel interacting protein 3, calsenilin                                                              |
| -9.9  | 216307_at    |   | DGKB                        | diacylglycerol kinase, beta 90kDa                                                                         |
| -9.9  | 232721_at    |   | TRIM55                      | tripartite motif containing 55                                                                            |
| -10.0 | 1558590_at   |   | METTL17                     | methyltransferase like 17                                                                                 |
| -10.0 | 219715_s_at  |   | TDP1 (includes EG: 104884)  | tyrosyl-DNA phosphodiesterase 1                                                                           |
| -10.0 | 212964_at    | D | HIC2                        | hypermethylated in cancer 2                                                                               |

Hui L, Wick HC, Edlow AG, Cowan JM, Bianchi DJW. Global gene expression analysis of term amniotic fluid cell-free fetal RNA *Obstet Gynecol* 2013;121.

The authors provided this information as a supplement to their article.

© Copyright 2013 American College of Obstetricians and Gynecologists.

|       |              |   |                             |                                                                    |
|-------|--------------|---|-----------------------------|--------------------------------------------------------------------|
| -10.0 | 242503_at    |   | CHST13                      | carbohydrate (chondroitin 4) sulfotransferase 13                   |
| -10.1 | 239374_at    |   | TRIM65                      | tripartite motif containing 65                                     |
| -10.2 | 1554704_at   |   | ATP8B3                      | ATPase, aminophospholipid transporter, class I, type 8B, member 3  |
| -10.2 | 244128_x_at  |   | GLIS1                       | GLIS family zinc finger 1                                          |
| -10.2 | 215076_s_at  | D | COL3A1                      | collagen, type III, alpha 1                                        |
| -10.2 | 221256_s_at  |   | HDHD3                       | haloacid dehalogenase-like hydrolase domain containing 3           |
| -10.3 | 221447_s_at  |   | GLT8D2                      | glycosyltransferase 8 domain containing 2                          |
| -10.3 | 224011_at    | D | SLC1A5                      | solute carrier family 1 (neutral amino acid transporter), member 5 |
| -10.3 | 214110_s_at  |   | LOC654342                   | lymphocyte-specific protein 1 pseudogene                           |
| -10.4 | 200951_s_at  | D | CCND2                       | cyclin D2                                                          |
| -10.4 | 227684_at    |   | S1PR2                       | sphingosine-1-phosphate receptor 2                                 |
| -10.4 | 210390_s_at  |   | CCL15                       | chemokine (C-C motif) ligand 15                                    |
| -10.5 | 236504_x_at  | D | C6orf52                     | chromosome 6 open reading frame 52                                 |
| -10.5 | 1552504_a_at |   | BRSK1                       | BR serine/threonine kinase 1                                       |
| -10.5 | 243161_x_at  | D | ZFP42                       | zinc finger protein 42 homolog (mouse)                             |
| -10.6 | 219304_s_at  |   | PDGFD                       | platelet derived growth factor D                                   |
| -10.6 | 226936_at    |   | CENPW                       | centromere protein W                                               |
| -10.6 | 204492_at    |   | ARHGAP11A                   | Rho GTPase activating protein 11A                                  |
| -10.6 | 215142_at    |   | CXorf27                     | chromosome X open reading frame 27                                 |
| -10.6 | 225255_at    |   | MRPL35 (includes EG:297334) | mitochondrial ribosomal protein L35                                |
| -10.6 | 221585_at    | D | CACNG4                      | calcium channel, voltage-dependent, gamma subunit 4                |
| -10.6 | 231179_at    |   | IP6K3                       | inositol hexakisphosphate kinase 3                                 |
| -10.6 | 1553982_a_at |   | RAB7B                       | RAB7B, member RAS oncogene family                                  |
| -10.7 | 204374_s_at  | D | GALK1                       | galactokinase 1                                                    |
| -10.7 | 202705_at    |   | CCNB2                       | cyclin B2                                                          |
| -10.7 | 213170_at    |   | GPX7                        | glutathione peroxidase 7                                           |
| -10.7 | 231667_at    | D | SLC39A5                     | solute carrier family 39 (metal ion transporter), member 5         |
| -10.7 | 222123_s_at  | D | HIF3A                       | hypoxia inducible factor 3, alpha subunit                          |
| -10.8 | 239226_at    | D | RTKN                        | rhotekin                                                           |
| -10.8 | 1554755_a_at | D | MTUS2                       | microtubule associated tumor suppressor candidate 2                |
| -10.8 | 237690_at    | D | GPR115                      | G protein-coupled receptor 115                                     |
| -10.9 | 211958_at    | D | IGFBP5                      | insulin-like growth factor binding protein 5                       |
| -10.9 | 211473_s_at  | D | COL4A6                      | collagen, type IV, alpha 6                                         |
| -10.9 | 216033_s_at  | D | FYN                         | FYN oncogene related to SRC, FGR, YES                              |
| -11.0 | 227875_at    |   | KLHL13                      | kelch-like 13 (Drosophila)                                         |
| -11.0 | 208345_s_at  | D | POU3F1                      | POU class 3 homeobox 1                                             |
| -11.0 | 205044_at    |   | GABRP                       | gamma-aminobutyric acid (GABA) A receptor, pi                      |
| -11.1 | 1556034_s_at | D | MTMR11                      | myotubularin related protein 11                                    |
| -11.1 | 220686_s_at  |   | PIWIL2                      | piwi-like 2 (Drosophila)                                           |
| -11.1 | 232321_at    | D | MUC17                       | mucin 17, cell surface associated                                  |
| -11.1 | 225401_at    | D | C1orf85                     | chromosome 1 open reading frame 85                                 |
| -11.1 | 208033_s_at  |   | ZFH3                        | zinc finger homeobox 3                                             |
| -11.2 | 226125_at    |   | LOC100288152                | uncharacterized LOC100288152                                       |
| -11.3 | 204121_at    |   | GADD45G                     | growth arrest and DNA-damage-inducible, gamma                      |

Hui L, Wick HC, Edlow AG, Cowan JM, Bianchi DJW. Global gene expression analysis of term amniotic fluid cell-free fetal RNA *Obstet Gynecol* 2013;121.

The authors provided this information as a supplement to their article.

© Copyright 2013 American College of Obstetricians and Gynecologists.



|       |              |   |                              |                                                                                                   |
|-------|--------------|---|------------------------------|---------------------------------------------------------------------------------------------------|
| -11.3 | 234472_at    | D | GALNT13                      | UDP-N-acetyl-alpha-D-galactosamine: polypeptide N-acetylgalactosaminyltransferase 13 (GalNAc-T13) |
| -11.3 | 243669_s_at  |   | PRAP1                        | proline-rich acidic protein 1                                                                     |
| -11.4 | 204401_at    |   | KCNN4                        | potassium intermediate/small conductance calcium-activated channel, subfamily N, member 4         |
| -11.4 | 219855_at    |   | NUDT11                       | nudix (nucleoside diphosphate linked moiety X)-type motif 11                                      |
| -11.4 | 228952_at    | D | ENPP1                        | ectonucleotide pyrophosphatase/phosphodiesterase 1                                                |
| -11.4 | 206062_at    | D | GUCA1A                       | guanylate cyclase activator 1A (retina)                                                           |
| -11.4 | 202954_at    |   | UBE2C                        | ubiquitin-conjugating enzyme E2C                                                                  |
| -11.4 | 204450_x_at  | D | APOA1                        | apolipoprotein A-I                                                                                |
| -11.5 | 214382_at    |   | UNC93A                       | unc-93 homolog A (C. elegans)                                                                     |
| -11.5 | 211959_at    | D | IGFBP5                       | insulin-like growth factor binding protein 5                                                      |
| -11.5 | 213385_at    |   | CHN2                         | chimerin (chimaerin) 2                                                                            |
| -11.6 | 1564383_s_at |   | FLJ35934                     | FLJ35934                                                                                          |
| -11.6 | 242414_at    | D | QPRT                         | quinolinate phosphoribosyltransferase                                                             |
| -11.6 | 204867_at    |   | GCHFR                        | GTP cyclohydrolase I feedback regulator                                                           |
| -11.7 | 235588_at    |   | ESCO2                        | establishment of cohesion 1 homolog 2 (S. cerevisiae)                                             |
| -11.7 | 222608_s_at  | D | ANLN                         | anillin, actin binding protein                                                                    |
| -11.7 | 210264_at    |   | GPR35                        | G protein-coupled receptor 35                                                                     |
| -11.7 | 214390_s_at  | D | BCAT1                        | branched chain amino-acid transaminase 1, cytosolic                                               |
| -11.7 | 205894_at    |   | ARSE                         | arylsulfatase E (chondrodysplasia punctata 1)                                                     |
| -11.8 | 239002_at    | D | ASPM                         | asp (abnormal spindle) homolog, microcephaly associated (Drosophila)                              |
| -11.8 | 204146_at    |   | RAD51AP1                     | RAD51 associated protein 1                                                                        |
| -11.9 | 210107_at    |   | CLCA1                        | chloride channel accessory 1                                                                      |
| -11.9 | 228359_at    | D | UBASH3B                      | ubiquitin associated and SH3 domain containing B                                                  |
| -11.9 | 1554974_at   | D | ACY3                         | aspartoacylase (aminocyclase) 3                                                                   |
| -12.0 | 209464_at    |   | AURKB                        | aurora kinase B                                                                                   |
| -12.0 | 229327_s_at  | D | MAF                          | v-maf musculoaponeurotic fibrosarcoma oncogene homolog (avian)                                    |
| -12.0 | 209773_s_at  |   | RRM2                         | ribonucleotide reductase M2                                                                       |
| -12.1 | 218700_s_at  |   | RAB7L1                       | RAB7, member RAS oncogene family-like 1                                                           |
| -12.1 | 220339_s_at  |   | TPSG1                        | tryptase gamma 1                                                                                  |
| -12.1 | 220310_at    |   | TUBAL3                       | tubulin, alpha-like 3                                                                             |
| -12.1 | 215324_at    |   | SEMA3D                       | sema domain, immunoglobulin domain (Ig), short basic domain, secreted, (semaphorin) 3D            |
| -12.2 | 205943_at    |   | TDO2                         | tryptophan 2,3-dioxygenase                                                                        |
| -12.2 | 221241_s_at  |   | BCL2L14 (includes EG:500348) | BCL2-like 14 (apoptosis facilitator)                                                              |
| -12.2 | 219768_at    |   | VTCN1                        | V-set domain containing T cell activation inhibitor 1                                             |
| -12.2 | 244151_at    | D | LOC100507203                 | uncharacterized LOC100507203                                                                      |
| -12.3 | 235276_at    | D | EPSTI1                       | epithelial stromal interaction 1 (breast)                                                         |
| -12.3 | 1552910_at   |   | SIGLEC11                     | sialic acid binding Ig-like lectin 11                                                             |
| -12.4 | 213201_s_at  |   | TNNT1                        | troponin T type 1 (skeletal, slow)                                                                |

Hui L, Wick HC, Edlow AG, Cowan JM, Bianchi DJW. Global gene expression analysis of term amniotic fluid cell-free fetal RNA *Obstet Gynecol* 2013;121.

The authors provided this information as a supplement to their article.

© Copyright 2013 American College of Obstetricians and Gynecologists.

|       |             |   |              |                                                                                        |
|-------|-------------|---|--------------|----------------------------------------------------------------------------------------|
| -12.5 | 230560_at   | D | STXBP6       | syntaxin binding protein 6 (amisyn)                                                    |
| -12.7 | 206090_s_at |   | DISC1        | disrupted in schizophrenia 1                                                           |
| -12.7 | 222171_s_at | D | PKNOX2       | PBX/knotted 1 homeobox 2                                                               |
| -12.7 | 209893_s_at |   | FUT4         | fucosyltransferase 4 (alpha (1,3)<br>fucosyltransferase, myeloid-specific)             |
| -12.8 | 228507_at   | D | PDE3A        | phosphodiesterase 3A, cGMP-inhibited                                                   |
| -12.8 | 216889_s_at | D | HNF4A        | hepatocyte nuclear factor 4, alpha                                                     |
| -12.8 | 203709_at   |   | PHKG2        | phosphorylase kinase, gamma 2 (testis)                                                 |
| -12.8 | 234985_at   |   | LDLRAD3      | low density lipoprotein receptor class A<br>domain containing 3                        |
| -12.8 | 1555867_at  | D | GNG4         | guanine nucleotide binding protein (G<br>protein), gamma 4                             |
| -12.9 | 231227_at   | D | WNT5A        | wingless-type MMTV integration site<br>family, member 5A                               |
| -12.9 | 203425_s_at | D | IGFBP5       | insulin-like growth factor binding protein 5                                           |
| -13.1 | 210177_at   | D | TRIM15       | tripartite motif containing 15                                                         |
| -13.2 | 221879_at   | D | CALML4       | calmodulin-like 4                                                                      |
| -13.2 | 216971_s_at |   | PLEC         | plectin                                                                                |
| -13.2 | 219140_s_at | D | RBP4         | retinol binding protein 4, plasma                                                      |
| -13.2 | 219533_at   | D | CDKN1C       | cyclin-dependent kinase inhibitor 1C (p57,<br>Kip2)                                    |
| -13.3 | 224323_s_at |   | MRO          | maestro                                                                                |
| -13.3 | 1553296_at  |   | GPR128       | G protein-coupled receptor 128                                                         |
| -13.3 | 235296_at   |   | EIF5A2       | eukaryotic translation initiation factor 5A2                                           |
| -13.3 | 227061_at   |   | LOC100506621 | uncharacterized LOC100506621                                                           |
| -13.4 | 203325_s_at | D | COL5A1       | collagen, type V, alpha 1                                                              |
| -13.5 | 203695_s_at |   | DFNA5        | deafness, autosomal dominant 5                                                         |
| -13.5 | 216272_x_at | D | SYDE1        | synapse defective 1, Rho GTPase, homolog<br>1 (C. elegans)                             |
| -13.6 | 206925_at   |   | ST8SIA4      | ST8 alpha-N-acetyl-neuraminide alpha-<br>2,8-sialyltransferase 4                       |
| -13.6 | 240387_at   | D | UBASH3B      | ubiquitin associated and SH3 domain<br>containing B                                    |
| -13.7 | 207003_at   |   | GUCA2A       | guanylate cyclase activator 2A (guanylin)                                              |
| -13.8 | 210944_s_at | D | CAPN3        | calpain 3, (p94)                                                                       |
| -13.9 | 232407_at   | D | MUC17        | mucin 17, cell surface associated                                                      |
| -13.9 | 229578_at   |   | JPH2         | junctophilin 2                                                                         |
| -13.9 | 201249_at   | D | SLC2A1       | solute carrier family 2 (facilitated glucose<br>transporter), member 1                 |
| -14.0 | 209348_s_at | D | MAF          | v-maf musculoaponeurotic fibrosarcoma<br>oncogene homolog (avian)                      |
| -14.0 | 236894_at   | D | L1TD1        | LINE-1 type transposase domain<br>containing 1                                         |
| -14.0 | 228576_s_at | D | MXRA8        | matrix-remodelling associated 8                                                        |
| -14.1 | 238940_at   | D | KLF12        | Kruppel-like factor 12                                                                 |
| -14.1 | 219173_at   | D | MYO15B       | myosin XVB pseudogene                                                                  |
| -14.1 | 213781_at   | D | PPP1R37      | protein phosphatase 1, regulatory subunit<br>37                                        |
| -14.1 | 205330_at   |   | MN1          | meningioma (disrupted in balanced<br>translocation) 1                                  |
| -14.1 | 214424_s_at | D | ALDOB        | aldolase B, fructose-bisphosphate                                                      |
| -14.2 | 201042_at   | D | TGM2         | transglutaminase 2 (C polypeptide,<br>protein-glutamine-gamma-<br>glutamyltransferase) |
| -14.2 | 242444_at   | D | C1QTNF6      | C1q and tumor necrosis factor related<br>protein 6                                     |
| -14.2 | 227955_s_at |   | EFNA5        | ephrin-A5                                                                              |

Hui L, Wick HC, Edlow AG, Cowan JM, Bianchi DJW. Global gene expression analysis of term amniotic fluid cell-free fetal RNA *Obstet Gynecol* 2013;121.

The authors provided this information as a supplement to their article.

© Copyright 2013 American College of Obstetricians and Gynecologists.

|       |              |   |                            |                                                                                   |
|-------|--------------|---|----------------------------|-----------------------------------------------------------------------------------|
| -14.3 | 235572_at    |   | SPC24 (includes EG:147841) | SPC24, NDC80 kinetochore complex component, homolog ( <i>S. cerevisiae</i> )      |
| -14.3 | 202830_s_at  |   | SLC37A4                    | solute carrier family 37 (glucose-6-phosphate transporter), member 4              |
| -14.3 | 206032_at    | D | DSC3 (includes EG:13507)   | desmocollin 3                                                                     |
| -14.3 | 202898_at    |   | SDC3                       | syndecan 3                                                                        |
| -14.4 | 228741_s_at  |   | HCN3                       | hyperpolarization activated cyclic nucleotide-gated potassium channel 3           |
| -14.4 | 229693_at    |   | TMEM220                    | transmembrane protein 220                                                         |
| -14.4 | 227743_at    | D | MYO15B                     | myosin XVB pseudogene                                                             |
| -14.5 | 211161_s_at  | D | COL3A1                     | collagen, type III, alpha 1                                                       |
| -14.6 | 214577_at    | D | MAP1B                      | microtubule-associated protein 1B                                                 |
| -14.6 | 203669_s_at  |   | DGAT1                      | diacylglycerol O-acyltransferase 1                                                |
| -14.6 | 237411_at    |   | ADAMTS6                    | ADAM metalloproteinase with thrombospondin type 1 motif, 6                        |
| -14.8 | 233517_s_at  | D | HIF3A                      | hypoxia inducible factor 3, alpha subunit                                         |
| -14.8 | 1557446_x_at |   | TREML3                     | triggering receptor expressed on myeloid cells-like 3                             |
| -14.8 | 204239_s_at  |   | NNAT                       | neuronatin                                                                        |
| -14.9 | 210095_s_at  | D | IGFBP3                     | insulin-like growth factor binding protein 3                                      |
| -14.9 | 233889_at    | D | TBX18                      | T-box 18                                                                          |
| -14.9 | 212143_s_at  | D | IGFBP3                     | insulin-like growth factor binding protein 3                                      |
| -15.0 | 207140_at    |   | ALPI                       | alkaline phosphatase, intestinal                                                  |
| -15.2 | 1552508_at   | D | KCNE4                      | potassium voltage-gated channel, Isk-related family, member 4                     |
| -15.3 | 211429_s_at  | D | SERPINA1                   | serpin peptidase inhibitor, clade A (alpha-1 antitrypsin), member 1               |
| -15.4 | 213946_s_at  | D | OBSL1                      | obscurin-like 1                                                                   |
| -15.4 | 231008_at    |   | UNC5CL                     | unc-5 homolog C ( <i>C. elegans</i> )-like                                        |
| -15.5 | 222781_s_at  |   | C9orf40                    | chromosome 9 open reading frame 40                                                |
| -15.5 | 220076_at    | D | ANKH                       | ankylosis, progressive homolog (mouse)                                            |
| -15.5 | 209355_s_at  | D | PPAP2B                     | phosphatidic acid phosphatase type 2B                                             |
| -15.6 | 201710_at    |   | MYBL2                      | v-myb myeloblastosis viral oncogene homolog (avian)-like 2                        |
| -15.6 | 235245_at    |   | TMEM92                     | transmembrane protein 92                                                          |
| -15.6 | 201852_x_at  | D | COL3A1                     | collagen, type III, alpha 1                                                       |
| -15.7 | 204636_at    |   | COL17A1                    | collagen, type XVII, alpha 1                                                      |
| -15.9 | 1558693_s_at | D | C1orf85                    | chromosome 1 open reading frame 85                                                |
| -15.9 | 1553954_at   |   | ALG14 (includes EG:199857) | asparagine-linked glycosylation 14 homolog ( <i>S. cerevisiae</i> )               |
| -16.1 | 36742_at     | D | TRIM15                     | tripartite motif containing 15                                                    |
| -16.3 | 1552507_at   | D | KCNE4                      | potassium voltage-gated channel, Isk-related family, member 4                     |
| -16.3 | 205076_s_at  | D | MTMR11                     | myotubularin related protein 11                                                   |
| -16.5 | 214961_at    | D | MTUS2                      | microtubule associated tumor suppressor candidate 2                               |
| -16.5 | 215021_s_at  | D | NRXN3                      | neurexin 3                                                                        |
| -16.6 | 210933_s_at  |   | FSCN1                      | fascin homolog 1, actin-bundling protein ( <i>Strongylocentrotus purpuratus</i> ) |
| -16.8 | 225241_at    | D | CCDC80                     | coiled-coil domain containing 80                                                  |
| -16.8 | 243292_at    |   | FAM132A                    | family with sequence similarity 132, member A                                     |
| -16.8 | 214454_at    | D | ADAMTS2                    | ADAM metalloproteinase with thrombospondin type 1 motif, 2                        |

Hui L, Wick HC, Edlow AG, Cowan JM, Bianchi DJW. Global gene expression analysis of term amniotic fluid cell-free fetal RNA *Obstet Gynecol* 2013;121.

The authors provided this information as a supplement to their article.

© Copyright 2013 American College of Obstetricians and Gynecologists.

|       |              |   |                              |                                                                                      |
|-------|--------------|---|------------------------------|--------------------------------------------------------------------------------------|
| -16.9 | 231632_at    |   | C19orf69                     | chromosome 19 open reading frame 69                                                  |
| -17.0 | 206346_at    | D | PRLR                         | prolactin receptor                                                                   |
| -17.0 | 64408_s_at   | D | CALML4                       | calmodulin-like 4                                                                    |
| -17.1 | 206213_at    |   | WNT10B                       | wingless-type MMTV integration site family, member 10B                               |
| -17.1 | 216910_at    | D | XPNPEP2                      | X-prolyl aminopeptidase (aminopeptidase P) 2, membrane-bound                         |
| -17.1 | 208496_x_at  | D | HIST1H3A (includes others)   | histone cluster 1, H3a                                                               |
| -17.1 | 237484_at    |   | C12orf69                     | chromosome 12 open reading frame 69                                                  |
| -17.1 | 208429_x_at  | D | HNF4A                        | hepatocyte nuclear factor 4, alpha                                                   |
| -17.2 | 209490_s_at  |   | PPT2 (includes EG:100126133) | palmitoyl-protein thioesterase 2                                                     |
| -17.2 | 59375_at     | D | MYO15B                       | myosin XVb pseudogene                                                                |
| -17.3 | 236972_at    |   | TRIM63                       | tripartite motif containing 63, E3 ubiquitin protein ligase                          |
| -17.3 | 227526_at    | D | CDON                         | Cdon homolog (mouse)                                                                 |
| -17.3 | 1559840_s_at | D | TBX18                        | T-box 18                                                                             |
| -17.3 | 202575_at    |   | CRABP2                       | cellular retinoic acid binding protein 2                                             |
| -17.3 | 222072_at    |   | XPNPEP1                      | X-prolyl aminopeptidase (aminopeptidase P) 1, soluble                                |
| -17.4 | 214676_x_at  | D | MUC3A                        | mucin 3A, cell surface associated                                                    |
| -17.4 | 211573_x_at  | D | TGM2                         | transglutaminase 2 (C polypeptide, protein-glutamine-gamma-glutamyltransferase)      |
| -17.5 | 220951_s_at  |   | A1CF                         | APOBEC1 complementation factor                                                       |
| -17.6 | 240873_x_at  |   | DAB2                         | disabled homolog 2, mitogen-responsive phosphoprotein (Drosophila)                   |
| -17.6 | 223393_s_at  |   | TSHZ3                        | teashirt zinc finger homeobox 3                                                      |
| -17.7 | 206793_at    |   | PNMT                         | phenylethanolamine N-methyltransferase                                               |
| -17.7 | 219955_at    | D | L1TD1                        | LINE-1 type transposase domain containing 1                                          |
| -17.8 | 220043_s_at  | D | MF12                         | antigen p97 (melanoma associated) identified by monoclonal antibodies 133.2 and 96.5 |
| -17.9 | 206894_at    |   | APOA4                        | apolipoprotein A-IV                                                                  |
| -18.0 | 207230_at    | D | CDON                         | Cdon homolog (mouse)                                                                 |
| -18.2 | 212488_at    | D | COL5A1                       | collagen, type V, alpha 1                                                            |
| -18.2 | 228083_at    |   | CACNA2D4                     | calcium channel, voltage-dependent, alpha 2/delta subunit 4                          |
| -18.2 | 214591_at    |   | KLHL4                        | kelch-like 4 (Drosophila)                                                            |
| -18.3 | 227629_at    | D | PRLR                         | prolactin receptor                                                                   |
| -18.4 | 206156_at    |   | GJB5                         | gap junction protein, beta 5, 31.1kDa                                                |
| -18.4 | 236144_at    | D | CPXM2                        | carboxypeptidase X (M14 family), member 2                                            |
| -18.4 | 213992_at    | D | COL4A6                       | collagen, type IV, alpha 6                                                           |
| -18.5 | 217073_x_at  | D | APOA1                        | apolipoprotein A-I                                                                   |
| -18.5 | 221163_s_at  |   | MLXIPL                       | MLX interacting protein-like                                                         |
| -18.6 | 204315_s_at  | D | GTSE1                        | G-2 and S-phase expressed 1                                                          |
| -18.6 | 229116_at    |   | CNKSR2                       | connector enhancer of kinase suppressor of Ras 2                                     |
| -18.9 | 1555923_a_at | D | C10orf114                    | chromosome 10 open reading frame 114                                                 |
| -19.2 | 206353_at    |   | COX6A2                       | cytochrome c oxidase subunit VIa polypeptide 2                                       |
| -19.3 | 219934_s_at  | D | SULT1E1                      | sulfotransferase family 1E, estrogen-preferring, member 1                            |

Hui L, Wick HC, Edlow AG, Cowan JM, Bianchi DJW. Global gene expression analysis of term amniotic fluid cell-free fetal RNA *Obstet Gynecol* 2013;121.

The authors provided this information as a supplement to their article.

© Copyright 2013 American College of Obstetricians and Gynecologists.

|       |              |   |                          |                                                                                     |
|-------|--------------|---|--------------------------|-------------------------------------------------------------------------------------|
| -19.4 | 204044_at    | D | QPRT                     | quinolinate phosphoribosyltransferase                                               |
| -19.5 | 228036_s_at  | D | FBXO2                    | F-box protein 2                                                                     |
| -19.5 | 213849_s_at  |   | PPP2R2B                  | protein phosphatase 2, regulatory subunit B, beta                                   |
| -19.5 | 1555175_a_at | D | PBLD                     | phenazine biosynthesis-like protein domain containing                               |
| -19.7 | 220014_at    | D | PRR16                    | proline rich 16                                                                     |
| -19.7 | 229377_at    |   | GRTP1                    | growth hormone regulated TBC protein 1                                              |
| -20.0 | 206715_at    | D | TFEC                     | transcription factor EC                                                             |
| -20.0 | 205990_s_at  | D | WNT5A                    | wingless-type MMTV integration site family, member 5A                               |
| -20.2 | 214719_at    |   | SLC46A3                  | solute carrier family 46, member 3                                                  |
| -20.2 | 211003_x_at  | D | TGM2                     | transglutaminase 2 (C polypeptide, protein-glutamine-gamma-glutamyltransferase)     |
| -20.4 | 229088_at    | D | ENPP1                    | ectonucleotide pyrophosphatase/phosphodiesterase 1                                  |
| -20.5 | 231841_s_at  | D | KIAA1462                 | KIAA1462                                                                            |
| -20.5 | 221436_s_at  |   | CDCA3                    | cell division cycle associated 3                                                    |
| -20.6 | 214065_s_at  | D | CIB2                     | calcium and integrin binding family member 2                                        |
| -21.2 | 233979_s_at  | D | ESPN                     | espin                                                                               |
| -21.3 | 230318_at    | D | SERPINA1                 | serpin peptidase inhibitor, clade A (alpha-1 antiproteinase, antitrypsin), member 1 |
| -21.8 | 214505_s_at  | D | FHL1 (includes EG:14199) | four and a half LIM domains 1                                                       |
| -21.8 | 214832_at    | D | HNF4A                    | hepatocyte nuclear factor 4, alpha                                                  |
| -21.8 | 210938_at    |   | PDX1 (includes EG:18609) | pancreatic and duodenal homeobox 1                                                  |
| -21.9 | 225681_at    |   | CTHRC1                   | collagen triple helix repeat containing 1                                           |
| -22.0 | 208450_at    |   | LGALS2                   | lectin, galactoside-binding, soluble, 2                                             |
| -22.1 | 238095_at    | D | GATA5                    | GATA binding protein 5                                                              |
| -22.2 | 1554776_at   | D | ZFP42                    | zinc finger protein 42 homolog (mouse)                                              |
| -22.2 | 212489_at    | D | COL5A1                   | collagen, type V, alpha 1                                                           |
| -22.2 | 206484_s_at  | D | XPNPEP2                  | X-prolyl aminopeptidase (aminopeptidase P) 2, membrane-bound                        |
| -22.4 | 229901_at    |   | ZNF488                   | zinc finger protein 488                                                             |
| -22.6 | 237810_at    | D | CLDN6                    | claudin 6                                                                           |
| -22.7 | 228207_at    |   | LOC100499489             | uncharacterized LOC100499489                                                        |
| -23.1 | 214142_at    |   | ZG16                     | zymogen granule protein 16 homolog (rat)                                            |
| -23.3 | 214357_at    |   | C1orf105                 | chromosome 1 open reading frame 105                                                 |
| -23.5 | 1554768_a_at |   | MAD2L1                   | MAD2 mitotic arrest deficient-like 1 (yeast)                                        |
| -23.6 | 220639_at    |   | TM4SF20                  | transmembrane 4 L six family member 20                                              |
| -23.6 | 216986_s_at  |   | IRF4                     | interferon regulatory factor 4                                                      |
| -23.7 | 212226_s_at  | D | PPAP2B                   | phosphatidic acid phosphatase type 2B                                               |
| -23.8 | 229310_at    |   | KLHL29                   | kelch-like 29 (Drosophila)                                                          |
| -24.3 | 221648_s_at  |   | AGMAT                    | agmatine ureohydrolase (agmatinase)                                                 |
| -24.6 | 241386_at    |   | LOC100506691             | uncharacterized LOC100506691                                                        |
| -24.7 | 205008_s_at  | D | CIB2                     | calcium and integrin binding family member 2                                        |
| -24.8 | 222086_s_at  | D | WNT6                     | wingless-type MMTV integration site family, member 6                                |
| -25.3 | 227736_at    | D | C10orf99                 | chromosome 10 open reading frame 99                                                 |
| -25.3 | 1255_g_at    | D | GUCA1A                   | guanylate cyclase activator 1A (retina)                                             |
| -25.6 | 205657_at    |   | HAAO                     | 3-hydroxyanthranilate 3,4-dioxygenase                                               |

Hui L, Wick HC, Edlow AG, Cowan JM, Bianchi DJW. Global gene expression analysis of term amniotic fluid cell-free fetal RNA *Obstet Gynecol* 2013;121.

The authors provided this information as a supplement to their article.

© Copyright 2013 American College of Obstetricians and Gynecologists.

|       |              |   |                          |                                                                                                              |
|-------|--------------|---|--------------------------|--------------------------------------------------------------------------------------------------------------|
| -25.7 | 207876_s_at  |   | FLNC                     | filamin C, gamma                                                                                             |
| -26.1 | 1552619_a_at | D | ANLN                     | anillin, actin binding protein                                                                               |
| -26.2 | 207220_at    |   | ART4                     | ADP-ribosyltransferase 4 (Dombrock blood group)                                                              |
| -26.2 | 220138_at    |   | HAND1                    | heart and neural crest derivatives expressed 1                                                               |
| -26.3 | 214347_s_at  | D | DDC                      | dopa decarboxylase (aromatic L-amino acid decarboxylase)                                                     |
| -26.4 | 238422_at    |   | LOC151534                | uncharacterized LOC151534                                                                                    |
| -26.5 | 204534_at    |   | VTN                      | vitronectin                                                                                                  |
| -26.6 | 201506_at    |   | TGFB1                    | transforming growth factor, beta-induced, 68kDa                                                              |
| -26.9 | 220421_at    |   | BTNL8                    | butyrophilin-like 8                                                                                          |
| -27.1 | 205007_s_at  | D | CIB2                     | calcium and integrin binding family member 2                                                                 |
| -27.2 | 222379_at    | D | KCNE4                    | potassium voltage-gated channel, Isk-related family, member 4                                                |
| -28.0 | 202833_s_at  | D | SERPINA1                 | serpin peptidase inhibitor, clade A (alpha-1 antiproteinase, antitrypsin), member 1                          |
| -28.2 | 235334_at    |   | ST6GALNAC3               | ST6 (alpha-N-acetyl-neuraminy-2,3-beta-galactosyl-1,3)-N-acetylgalactosaminide alpha-2,6-sialyltransferase 3 |
| -28.3 | 1561880_a_at |   | SIGLEC16                 | sialic acid binding Ig-like lectin 16 (gene/pseudogene)                                                      |
| -28.5 | 210298_x_at  | D | FHL1 (includes EG:14199) | four and a half LIM domains 1                                                                                |
| -28.9 | 206149_at    |   | CHP2                     | calcineurin B homologous protein 2                                                                           |
| -29.1 | 211890_x_at  | D | CAPN3                    | calpain 3, (p94)                                                                                             |
| -29.2 | 230716_at    | D | LOC100507203             | uncharacterized LOC100507203                                                                                 |
| -29.9 | 219047_s_at  |   | ZNF668                   | zinc finger protein 668                                                                                      |
| -30.1 | 221605_s_at  |   | PIPOX                    | pipecolic acid oxidase                                                                                       |
| -30.9 | 209560_s_at  |   | DLK1                     | delta-like 1 homolog (Drosophila)                                                                            |
| -31.2 | 218687_s_at  | D | MUC13                    | mucin 13, cell surface associated                                                                            |
| -31.4 | 212358_at    |   | CLIP3                    | CAP-GLY domain containing linker protein 3                                                                   |
| -31.5 | 206535_at    |   | SLC2A2                   | solute carrier family 2 (facilitated glucose transporter), member 2                                          |
| -31.7 | 1554524_a_at |   | OLFM3                    | olfactomedin 3                                                                                               |
| -32.0 | 207203_s_at  |   | NR112                    | nuclear receptor subfamily 1, group I, member 2                                                              |
| -32.3 | 228975_at    |   | SP6                      | Sp6 transcription factor                                                                                     |
| -32.5 | 225973_at    |   | TAP2                     | transporter 2, ATP-binding cassette, subfamily B (MDR/TAP)                                                   |
| -32.7 | 231562_at    | D | APOC2                    | apolipoprotein C-II                                                                                          |
| -32.9 | 235383_at    | D | MYO7B                    | myosin VIIB                                                                                                  |
| -33.5 | 243267_x_at  | D | EFNA2                    | ephrin-A2                                                                                                    |
| -33.5 | 1565728_at   |   | LOC284630                | uncharacterized LOC284630                                                                                    |
| -33.7 | 201540_at    | D | FHL1 (includes EG:14199) | four and a half LIM domains 1                                                                                |
| -34.2 | 214475_x_at  | D | CAPN3                    | calpain 3, (p94)                                                                                             |
| -34.6 | 208025_s_at  |   | HMGA2                    | high mobility group AT-hook 2                                                                                |
| -35.0 | 209847_at    |   | CDH17                    | cadherin 17, LI cadherin (liver-intestine)                                                                   |
| -35.0 | 227609_at    | D | EPST11                   | epithelial stromal interaction 1 (breast)                                                                    |
| -35.6 | 226084_at    | D | MAP1B                    | microtubule-associated protein 1B                                                                            |
| -35.8 | 220074_at    | D | CDHR5                    | cadherin-related family member 5                                                                             |

Hui L, Wick HC, Edlow AG, Cowan JM, Bianchi DJW. Global gene expression analysis of term amniotic fluid cell-free fetal RNA *Obstet Gynecol* 2013;121.

The authors provided this information as a supplement to their article.

© Copyright 2013 American College of Obstetricians and Gynecologists.

|       |              |   |                          |                                                                                                 |
|-------|--------------|---|--------------------------|-------------------------------------------------------------------------------------------------|
| -35.9 | 211071_s_at  |   | MLLT11                   | myeloid/lymphoid or mixed-lineage leukemia (trithorax homolog, Drosophila); translocated to, 11 |
| -36.1 | 229777_at    |   | CLRN3                    | clarin 3                                                                                        |
| -36.9 | 205506_at    | D | VIL1                     | villin 1                                                                                        |
| -37.0 | 228399_at    |   | OSR1                     | odd-skipped related 1 (Drosophila)                                                              |
| -37.4 | 225013_at    | D | LZTS2                    | leucine zipper, putative tumor suppressor 2                                                     |
| -37.6 | 208373_s_at  |   | P2RY6                    | pyrimidineric receptor P2Y, G-protein coupled, 6                                                |
| -37.9 | 236548_at    | D | GIPC2                    | GIPC PDZ domain containing family, member 2                                                     |
| -38.1 | 1569225_a_at | D | SCML4                    | sex comb on midleg-like 4 (Drosophila)                                                          |
| -38.1 | 1556472_s_at | D | SCML4                    | sex comb on midleg-like 4 (Drosophila)                                                          |
| -38.3 | 232707_at    |   | ISX                      | intestine-specific homeobox                                                                     |
| -39.1 | 234329_at    |   | CLIC5                    | chloride intracellular channel 5                                                                |
| -39.1 | 1566324_a_at | D | MAF                      | v-maf musculoaponeurotic fibrosarcoma oncogene homolog (avian)                                  |
| -39.6 | 1554593_s_at | D | SLC1A6                   | solute carrier family 1 (high affinity aspartate/glutamate transporter), member 6               |
| -39.8 | 220812_s_at  | D | HHLA2                    | HERV-H LTR-associating 2                                                                        |
| -40.3 | 229473_at    |   | MAMDC4                   | MAM domain containing 4                                                                         |
| -40.4 | 227006_at    |   | PPP1R14A                 | protein phosphatase 1, regulatory (inhibitor) subunit 14A                                       |
| -40.6 | 207214_at    |   | SPINK4                   | serine peptidase inhibitor, Kazal type 4                                                        |
| -40.9 | 204272_at    |   | LGALS4                   | lectin, galactoside-binding, soluble, 4                                                         |
| -41.5 | 231694_at    | D | APOA1                    | apolipoprotein A-I                                                                              |
| -43.9 | 230418_s_at  |   | GALNTL1                  | UDP-N-acetyl-alpha-D-galactosamine: polypeptide N-acetylgalactosaminyltransferase-like 1        |
| -44.3 | 219306_at    |   | KIF15                    | kinesin family member 15                                                                        |
| -44.4 | 222943_at    |   | GBA3                     | glucosidase, beta, acid 3 (cytosolic)                                                           |
| -44.4 | 205517_at    | D | GATA4                    | GATA binding protein 4                                                                          |
| -44.5 | 216238_s_at  | D | FGB (includes EG:110135) | fibrinogen beta chain                                                                           |
| -44.8 | 202947_s_at  |   | GYPC                     | glycophorin C (Gerbich blood group)                                                             |
| -44.8 | 206430_at    |   | CDX1                     | caudal type homeobox 1                                                                          |
| -46.0 | 207259_at    |   | LINC00483                | long intergenic non-protein coding RNA 483                                                      |
| -46.6 | 206741_at    |   | C3orf32                  | chromosome 3 open reading frame 32                                                              |
| -46.6 | 202888_s_at  |   | ANPEP                    | alanyl (membrane) aminopeptidase                                                                |
| -46.7 | 231798_at    |   | NOG                      | noggin                                                                                          |
| -47.5 | 209596_at    |   | MXRA5                    | matrix-remodelling associated 5                                                                 |
| -48.4 | 206391_at    |   | RARRES1                  | retinoic acid receptor responder (tazarotene induced) 1                                         |
| -48.7 | 206882_at    | D | SLC1A6                   | solute carrier family 1 (high affinity aspartate/glutamate transporter), member 6               |
| -49.2 | 205910_s_at  | D | CEL                      | carboxyl ester lipase (bile salt-stimulated lipase)                                             |
| -49.7 | 219970_at    | D | GIPC2                    | GIPC PDZ domain containing family, member 2                                                     |
| -49.7 | 228329_at    | D | DAB1                     | disabled homolog 1 (Drosophila)                                                                 |
| -49.8 | 205666_at    |   | FMO1 (includes EG:14261) | flavin containing monooxygenase 1                                                               |
| -50.4 | 227055_at    |   | METTL7B                  | methyltransferase like 7B                                                                       |
| -50.6 | 205900_at    |   | KRT1                     | keratin 1                                                                                       |

Hui L, Wick HC, Edlow AG, Cowan JM, Bianchi DJW. Global gene expression analysis of term amniotic fluid cell-free fetal RNA *Obstet Gynecol* 2013;121.

The authors provided this information as a supplement to their article.

© Copyright 2013 American College of Obstetricians and Gynecologists.

|        |              |   |                          |                                                                                    |
|--------|--------------|---|--------------------------|------------------------------------------------------------------------------------|
| -51.8  | 1554375_a_at |   | NR1H4                    | nuclear receptor subfamily 1, group H, member 4                                    |
| -52.6  | 210292_s_at  |   | PCDH11X/PCDH11Y          | protocadherin 11 Y-linked                                                          |
| -52.9  | 206077_at    |   | KEL                      | Kell blood group, metallo-endopeptidase                                            |
| -52.9  | 224209_s_at  |   | GDA                      | guanine deaminase                                                                  |
| -54.4  | 204588_s_at  |   | SLC7A7                   | solute carrier family 7 (amino acid transporter light chain, y+L system), member 7 |
| -54.8  | 1554867_a_at | D | PRR16                    | proline rich 16                                                                    |
| -55.5  | 219404_at    |   | EPS8L3                   | EPS8-like 3                                                                        |
| -55.7  | 1553131_a_at | D | GATA4                    | GATA binding protein 4                                                             |
| -57.1  | 1553970_s_at | D | CEL                      | carboxyl ester lipase (bile salt-stimulated lipase)                                |
| -58.4  | 232428_at    |   | MOGAT2                   | monoacylglycerol O-acyltransferase 2                                               |
| -59.4  | 238177_at    | D | SLC6A19                  | solute carrier family 6 (neutral amino acid transporter), member 19                |
| -60.0  | 232383_at    | D | TFEC                     | transcription factor EC                                                            |
| -63.1  | 224374_s_at  | D | EMILIN2                  | elastin microfibril interfacier 2                                                  |
| -64.9  | 210299_s_at  | D | FHL1 (includes EG:14199) | four and a half LIM domains 1                                                      |
| -65.1  | 206387_at    |   | CDX2                     | caudal type homeobox 2                                                             |
| -68.2  | 205137_x_at  | D | USH1C                    | Usher syndrome 1C (autosomal recessive, severe)                                    |
| -70.7  | 207412_x_at  |   | CELP                     | carboxyl ester lipase pseudogene                                                   |
| -71.2  | 243556_at    | D | NGEF                     | neuronal guanine nucleotide exchange factor                                        |
| -71.5  | 206664_at    |   | SI                       | sucrase-isomaltase (alpha-glucosidase)                                             |
| -71.6  | 223549_s_at  | D | ESPN                     | espin                                                                              |
| -71.8  | 233604_at    |   | FLJ22763                 | uncharacterized LOC401081                                                          |
| -76.0  | 204694_at    |   | AFP                      | alpha-fetoprotein                                                                  |
| -76.1  | 223447_at    |   | REG4                     | regenerating islet-derived family, member 4                                        |
| -78.3  | 205719_s_at  |   | PAH                      | phenylalanine hydroxylase                                                          |
| -83.3  | 210451_at    | D | PKLR                     | pyruvate kinase, liver and RBC                                                     |
| -87.4  | 228912_at    | D | VIL1                     | villin 1                                                                           |
| -88.7  | 230914_at    | D | HNF4A                    | hepatocyte nuclear factor 4, alpha                                                 |
| -94.0  | 212962_at    | D | SYDE1                    | synapse defective 1, Rho GTPase, homolog 1 (C. elegans)                            |
| -95.0  | 206260_at    |   | TGM4                     | transglutaminase 4 (prostate)                                                      |
| -98.3  | 212942_s_at  |   | KIAA1199                 | KIAA1199                                                                           |
| -99.4  | 204920_at    | D | CPS1                     | carbamoyl-phosphate synthase 1, mitochondrial                                      |
| -100.0 | 218345_at    |   | TMEM176A                 | transmembrane protein 176A                                                         |
| -102.1 | 220376_at    |   | LRRC19                   | leucine rich repeat containing 19                                                  |
| -105.5 | 217564_s_at  | D | CPS1                     | carbamoyl-phosphate synthase 1, mitochondrial                                      |
| -108.0 | 205108_s_at  | D | APOB                     | apolipoprotein B (including Aq(x) antigen)                                         |
| -108.3 | 207858_s_at  | D | PKLR                     | pyruvate kinase, liver and RBC                                                     |
| -110.0 | 207456_at    |   | HNF4G                    | hepatocyte nuclear factor 4, gamma                                                 |
| -113.5 | 205311_at    | D | DDC                      | dopa decarboxylase (aromatic L-amino acid decarboxylase)                           |
| -114.7 | 1554592_a_at | D | SLC1A6                   | solute carrier family 1 (high affinity aspartate/glutamate transporter), member 6  |
| -117.3 | 211184_s_at  | D | USH1C                    | Usher syndrome 1C (autosomal recessive, severe)                                    |
| -121.2 | 205675_at    |   | MTTP                     | microsomal triglyceride transfer protein                                           |

Hui L, Wick HC, Edlow AG, Cowan JM, Bianchi DJW. Global gene expression analysis of term amniotic fluid cell-free fetal RNA *Obstet Gynecol* 2013;121.

The authors provided this information as a supplement to their article.

© Copyright 2013 American College of Obstetricians and Gynecologists.



|         |             |   |          |                                                                                            |
|---------|-------------|---|----------|--------------------------------------------------------------------------------------------|
| -123.8  | 230481_at   | D | ACY3     | aspartoacylase (aminocyclase) 3                                                            |
| -128.3  | 223579_s_at | D | APOB     | apolipoprotein B (including Ag(x) antigen)                                                 |
| -128.5  | 206000_at   |   | MEP1A    | meprin A, alpha (PABA peptide hydrolase)                                                   |
| -133.6  | 206143_at   |   | SLC26A3  | solute carrier family 26, member 3                                                         |
| -134.3  | 205046_at   |   | CENPE    | centromere protein E, 312kDa                                                               |
| -136.0  | 219465_at   | D | APOA2    | apolipoprotein A-II                                                                        |
| -152.7  | 207200_at   |   | OTC      | ornithine carbamoyltransferase                                                             |
| -153.2  | 207570_at   |   | SHOX     | short stature homeobox                                                                     |
| -154.9  | 1561951_at  | D | SLC5A12  | solute carrier family 5 (sodium/glucose cotransporter), member 12                          |
| -157.3  | 209660_at   |   | TTR      | transthyretin                                                                              |
| -163.4  | 231561_s_at | D | APOC2    | apolipoprotein C-II                                                                        |
| -163.9  | 206292_s_at | D | SULT2A1  | sulfotransferase family, cytosolic, 2A, dehydroepiandrosterone (DHEA)-preferring, member 1 |
| -169.7  | 231693_at   | D | FABP1    | fatty acid binding protein 1, liver                                                        |
| -201.9  | 206988_at   |   | CCL25    | chemokine (C-C motif) ligand 25                                                            |
| -206.3  | 204561_x_at | D | APOC2    | apolipoprotein C-II                                                                        |
| -237.0  | 222712_s_at | D | MUC13    | mucin 13, cell surface associated                                                          |
| -288.2  | 231587_at   | D | APOC3    | apolipoprotein C-III                                                                       |
| -298.2  | 220611_at   | D | DAB1     | disabled homolog 1 (Drosophila)                                                            |
| -304.8  | 220075_s_at | D | CDHR5    | cadherin-related family member 5                                                           |
| -354.5  | 206293_at   | D | SULT2A1  | sulfotransferase family, cytosolic, 2A, dehydroepiandrosterone (DHEA)-preferring, member 1 |
| -405.4  | 236981_at   |   | C17orf99 | chromosome 17 open reading frame 99                                                        |
| -411.9  | 208323_s_at |   | ANXA13   | annexin A13                                                                                |
| -461.0  | 219466_s_at | D | APOA2    | apolipoprotein A-II                                                                        |
| -653.6  | 205892_s_at | D | FABP1    | fatty acid binding protein 1, liver                                                        |
| -754.7  | 205820_s_at | D | APOC3    | apolipoprotein C-III                                                                       |
| -1215.2 | 231734_at   |   | RBP2     | retinol binding protein 2, cellular                                                        |

Type of file: table

Label: 3

Filename: AOG203121-13-31R1 Appendix 4 (3-22-13v1) clean.pdf

Appendix 4. IPA Core Analysis Results: Physiological Systems Enriched in Term Amniotic Fluid

| Category                | # total genes | Functions Annotation                      | BH p-Value | # Genes | Molecules                                                                                                                                                                                                                                                                                                                                                                              |
|-------------------------|---------------|-------------------------------------------|------------|---------|----------------------------------------------------------------------------------------------------------------------------------------------------------------------------------------------------------------------------------------------------------------------------------------------------------------------------------------------------------------------------------------|
| Immune Cell Trafficking | 72            | cell movement of neutrophils              | 0.001      | 31      | AGER, BPIFA1, C3, CD36, CD44, CD74, CFTR, CNN2, CSF1, CXADR, CXCL2, DEFB1, FOXA2, GJB2, IL1B, IL33, IL6R, IL6ST, IL8, MMP7, NCF1, PLG, PTGER3, PTGS2, SLPI, SMAD3, TGFB2, TLR2, UNC5B                                                                                                                                                                                                  |
|                         |               | cell movement of antigen presenting cells | 0.005      | 30      | ABCC1, AGER, C3, CCDC88A, CCL22, CD209, CD44, CD74, CNN2, CXCL14, CXCL17, DEFB1, DMBT1, EDNRB, IL1B, IL8, LDLR, LRRK2, MIF, PIGR, PLG, PTGS2, SFTPD, SMAD3, STC1, TLR2, VEGFA                                                                                                                                                                                                          |
|                         |               | activation of antigen presenting cells    | 0.008      | 23      | AGER, C3, CCL22, CD209, CD74, CHI3L1, CSF1, FOXA2, HLA-DMA, HLA-DQA1, HLA-DQB1, IL1B, IL33, IL8, KNG1, PLG, PTGER3, PTGS2, RORA, SLPI, VEGFA                                                                                                                                                                                                                                           |
|                         |               | leukocyte migration                       | 0.012      | 62      | ABCC1, AGER, BPIFA1, C3, CCDC88A, CCL22, CD209, CD36, CD44, CHI3L1, CNN2, COL4A1, COL4A3, CSF1, CXADR, CXCL14, CXCL17, CXCL2, CYSLTR1, DEFB1, DMBT1, EDNRB, ESAM, FOXA2, GJB2, HOXA7, IL1B, IL6ST, IL8, ITGA3, ITGA9, KITLG, KNG1, LDLR, LRRK2, MMP28, MMP7, NFIC, NFKBIZ, NQO1, PIGR, PLG, PRF1, PTGER3, PTGS2, RORC, SCGE1, SFTPD, SLPI, SMAD3, STC1, TGFB2, TLR2, UNC5B, VDR, VEGFA |
|                         |               | recruitment of antigen presenting cells   | 0.015      | 13      | CCL22, CD36, CD44, CNN2, CSF1, FOXA2, IL1B, IL8, MMP28, NFIC, PIGR                                                                                                                                                                                                                                                                                                                     |
|                         |               | influx of neutrophils                     | 0.017      | 8       | CD44, CXCL2, IL6R, IRAK3, LCN2, SFTPD, SMAD3, TLR2                                                                                                                                                                                                                                                                                                                                     |
|                         |               | migration of antigen presenting cells     | 0.018      | 17      | ABCC1, C3, CCL22, CD209, CD44, CD74, CNN2, CSF1, CXCL17, DEFB1, IL1B, IL8, PIGR, PLG, TLR2, VEGFA                                                                                                                                                                                                                                                                                      |
|                         |               | recruitment of phagocytes                 | 0.022      | 20      | CCL22, CD36, CD44, CHI3L1, CNN2, CSF1, CXCL2, FOXA2, IL1B, IL33, MMP28, MUC1, NFIC, PLG, SLPI, SMAD3, TLR2, VDR                                                                                                                                                                                                                                                                        |

Hui L, Wick HC, Edlow AG, Cowan JM, Bianchi DJW. Global gene expression analysis of term amniotic fluid cell-free fetal RNA. *Obstet Gynecol* 2013;121.

The authors provided this information as a supplement to their article.

|                                           |    |                                                       |       |    |                                                                                                                                                                                                                                                              |
|-------------------------------------------|----|-------------------------------------------------------|-------|----|--------------------------------------------------------------------------------------------------------------------------------------------------------------------------------------------------------------------------------------------------------------|
|                                           |    | activation of granulocytes                            | 0.039 | 12 | AGER, C3, CCL22, CEACAM6, IL1B, IL33, IL8, KITLG, LCN2, PRG2, RA                                                                                                                                                                                             |
|                                           |    | adhesion of blood-derived mast cells                  | 0.046 | 2  | IL1B, IL33                                                                                                                                                                                                                                                   |
| Digestive System Development and Function | 51 | morphology of intestine                               | 0.001 | 25 | ABCC4, APC, C3, CD36, CFTR, FGFR2, FOLR1, HSD11B2, IL6ST, IRAK3, MGLL, NFIX, PIGR, PLG, PPARGC1A, PTGS2, RORC, SLC12A2, SLC4A4, TFF1, TFF2, TGFB2, VDR                                                                                                       |
|                                           |    | morphology of digestive system                        | 0.012 | 46 | ABCC4, ANTXR1, APC, BHMT, C3, CD36, CFTR, CP, CSF1, FGFR2, FST, HSD11B2, IL6ST, IRAK3, ITGA3, LAMA3, LDLR, LRP6, MGLL, NFIX, NQO1, OSMR, PAX9, PIGR, PLG, PPARGC1A, PTGS2, RASGRF1, RUNX2, SIM2, SLC12A2, SLC4A4, SMAD3, SOD2, SPDEF, TFF1, TFF2, VDR, VEGFA |
|                                           |    | secretion of saliva                                   | 0.023 | 5  | AQP1, AQP5, C3, CHRM3, ITPR2                                                                                                                                                                                                                                 |
|                                           |    | morphology of colon                                   | 0.030 | 7  | CFTR, MGLL, PLG, PTGS2, RORC, SLC12A2, VDR                                                                                                                                                                                                                   |
|                                           |    | tooth development                                     | 0.041 | 11 | ANTXR1, BMP2, CSF1, FGFR2, FST, LRP6, NFIC, PAX9, PLG, RUNX2, S                                                                                                                                                                                              |
| Hematopoiesis                             | 23 | colony formation of myeloid cells                     | 0.003 | 10 | CDA, CSF1, HOXA10, HOXA9, IL1B, IL6R, IL6ST, KITLG, MECOM, MLL                                                                                                                                                                                               |
|                                           |    | colony formation of leukocytes                        | 0.003 | 11 | CDA, CSF1, HOXA10, HOXA9, IL1B, IL6R, IL6ST, KITLG, MECOM, MITF                                                                                                                                                                                              |
|                                           |    | colony formation of colony forming multilineage cells | 0.011 | 4  | HOXA10, HOXA9, KITLG, MLL                                                                                                                                                                                                                                    |
|                                           |    | lymphopoiesis of bone marrow cells                    | 0.011 | 4  | CD44, FST, KITLG, LFNG                                                                                                                                                                                                                                       |
|                                           |    | colony formation of phagocytes                        | 0.019 | 7  | CDA, CSF1, HOXA10, HOXA9, KITLG, MITF, MLL                                                                                                                                                                                                                   |
|                                           |    | colony formation of myeloid progenitor cells          | 0.028 | 5  | CSF1, HOXA9, KITLG, MECOM, MLL                                                                                                                                                                                                                               |
|                                           |    | hematopoiesis of bone marrow cells                    | 0.028 | 6  | CD44, FST, IL6R, IL6ST, KITLG, LFNG                                                                                                                                                                                                                          |
|                                           |    | colony formation of hematopoietic progenitor cells    | 0.031 | 10 | CDA, CSF1, HOXA10, HOXA9, IL6R, IL6ST, KITLG, MECOM, MLL, VEGF                                                                                                                                                                                               |
|                                           |    | hematopoiesis of lymphatic system component           | 0.033 | 8  | CD44, CSF1, EAF2, FST, IL6R, IL6ST, KITLG, LFNG                                                                                                                                                                                                              |

Hui L, Wick HC, Edlow AG, Cowan JM, Bianchi DJW. Global gene expression analysis of term amniotic fluid cell-free fetal RNA. *Obstet Gynecol* 2013;121.

The authors provided this information as a supplement to their article.

|                                                |    |                                                      |       |    |                                                                                                                                                                                      |
|------------------------------------------------|----|------------------------------------------------------|-------|----|--------------------------------------------------------------------------------------------------------------------------------------------------------------------------------------|
|                                                |    | differentiation of bone marrow cells                 | 0.037 | 16 | BMP2, C3, CD44, CSF1, FGFR2, FST, IL33, IL6R, IL6ST, KITLG, LFNG, RUNX2, SMAD3, VDR, VEGFA                                                                                           |
|                                                |    | lymphopoiesis of long-term bone marrow culture cells | 0.046 | 2  | CD44, FST                                                                                                                                                                            |
|                                                |    | colony formation of macrophages                      | 0.048 | 5  | CSF1, HOXA10, HOXA9, KITLG, MLL                                                                                                                                                      |
| Cardiovascular System Development and Function | 39 | proliferation of endothelial cells                   | 0.003 | 28 | AGER, ARHGAP24, BMP2, C3, CD36, CD44, COL4A1, COL4A3, CSF1, EDNRB, FGFR2, FZD5, HAS3, IL1B, IL8, KNG1, MGP, NRP2, PLG, PLXNA4, PTPRM, RICTOR, RUNX2, SLC8A1, TGFB2, VEGFA            |
|                                                |    | endothelial cell development                         | 0.005 | 30 | AGER, ARHGAP24, BMP2, C3, CD36, CD44, COL4A1, COL4A3, CSF1, EDNRB, FGFR2, FZD5, HAS3, IL1B, IL8, KNG1, MGP, NRP2, PLG, PLXNA4, PTPRM, RICTOR, RUNX2, SLC8A1, STC1, TGFB2, VEGFA      |
|                                                |    | development of cardiovascular tissue                 | 0.015 | 31 | AGER, ARHGAP24, BMP2, C3, CD36, CD44, COL4A1, COL4A3, CSF1, EDNRB, FGFR2, FZD5, HAS3, IL1B, IL8, KNG1, MGP, NRP2, PLG, PLXNA4, PTPRM, RICTOR, RUNX2, SLC8A1, STC1, TGFB2, TTN, VEGFA |
|                                                |    | angiogenesis of lesion                               | 0.016 | 4  | HOXD3, KITLG, PLG, VEGFA                                                                                                                                                             |
|                                                |    | activation of endothelial cells                      | 0.028 | 9  | C3, CSF1, HBEGF, IL1B, IL33, IL6R, RUNX2, TLR2, VEGFA                                                                                                                                |
|                                                |    | activation of vascular endothelial cells             | 0.028 | 6  | CSF1, HBEGF, IL1B, RUNX2, TLR2, VEGFA                                                                                                                                                |
|                                                |    | proliferation of microvascular endothelial cells     | 0.028 | 5  | AGER, C3, IL1B, IL8, VEGFA                                                                                                                                                           |
|                                                |    | binding of blood vessel                              | 0.031 | 4  | CD44, CXCL2, IL1B, IL8                                                                                                                                                               |
|                                                |    | binding of endothelial cells                         | 0.039 | 12 | AGER, C3, CD44, HAS3, IL1B, IL8, ITGA3, KITLG, KNG1, PIGR, PLG, VEGFA                                                                                                                |
|                                                |    | binding of microvessel                               | 0.041 | 3  | CXCL2, IL1B, IL8                                                                                                                                                                     |
| Hematological System Development and Function  | 23 | colony formation of erythroid cell lines             | 0.003 | 6  | HOXA10, HOXA9, IL6R, IL6ST, KITLG, MLL                                                                                                                                               |
|                                                |    | quantity of macrophages                              | 0.028 | 17 | ABCA1, BIRC3, CCL22, CNN2, CSF1, CXCL14, HBEGF, IL1B, IL33, LCN2, PDGFC, PLG, PRF1, SFTPD, VDR, VEGFA                                                                                |
|                                                |    | cell viability of blood-derived mast cells           | 0.041 | 3  | IL1B, IL33, KITLG                                                                                                                                                                    |

Hui L, Wick HC, Edlow AG, Cowan JM, Bianchi DJW. Global gene expression analysis of term amniotic fluid cell-free fetal RNA. *Obstet Gynecol* 2013;121.

The authors provided this information as a supplement to their article.

|                                        |    |                                  |       |    |                                                                                                                                                                                                                                                           |
|----------------------------------------|----|----------------------------------|-------|----|-----------------------------------------------------------------------------------------------------------------------------------------------------------------------------------------------------------------------------------------------------------|
| Tissue Development                     | 72 | development of epithelial tissue | 0.003 | 40 | ABCA3, AGER, ARHGAP24, BMP2, C3, CD36, CD44, COL4A1, COL4A3, CSF1, CXCL2, ECM1, EDNRB, EPB41L5, FGFR2, FZD5, GJB2, HAS3, HYAL1, IL8, KITLG, KNG1, LAMA3, MGP, MITF, NRP2, PLG, PLXNA4, PTGS2, PIP2, RICTOR, RUNX2, SLC8A1, SOX10, STC1, TGFB2, VEGFA, WT1 |
|                                        |    | inflammation of mucosa           | 0.019 | 3  | ABCC1, PTGS2, SMAD3                                                                                                                                                                                                                                       |
|                                        |    | development of membrane tissue   | 0.028 | 5  | BMP2, IL1B, LRP6, MECOM, SMAD3                                                                                                                                                                                                                            |
|                                        |    | development of melanocytes       | 0.028 | 3  | KITLG, MITF, SOX10                                                                                                                                                                                                                                        |
|                                        |    | development of connective tissue | 0.033 | 23 | AGER, BMP2, CSF1, ETV1, HBEGF, HOXA10, HOXD3, IL6R, IL6ST, INS, LAMA3, LPIN1, LRP6, MECOM, NOV, PTGS2, RUNX2, SMAD3, SOX5, TGFBI, VEGFA                                                                                                                   |
|                                        |    | formation of epithelial tissue   | 0.033 | 11 | ARHGAP24, CD44, COL4A1, COL4A3, COL4A4, IL8, KNG1, RUNX2, SLIT1, WT1                                                                                                                                                                                      |
|                                        |    | formation of connective tissue   | 0.041 | 6  | BMP2, FST, PLG, SOX5, VEGFA, WT1                                                                                                                                                                                                                          |
|                                        |    | adhesion of epithelial cells     | 0.046 | 11 | C3, HBEGF, ITGA3, KLK6, LAMA3, MUC1, NOV, PIGR, SFTPD, SLPI, SCN5A                                                                                                                                                                                        |
| Hair and Skin Development and Function | 23 | adhesion of mesothelial cells    | 0.046 | 2  | HBEGF, ITGA3                                                                                                                                                                                                                                              |
|                                        |    | morphogenesis of hair follicle   | 0.004 | 8  | FGFR2, FOXQ1, FST, KRT27, KRT71, PTGS2, TGFB2, TGM3                                                                                                                                                                                                       |
|                                        |    | development of epidermis         | 0.011 | 19 | ALDH3A2, APC, CDSN, CST6, FGFR2, FLG, FOXQ1, FST, KLK5, KLK7, KRT71, LAMA3, PTGS2, STS, TGFB2, TGM3, VDR, VEGFA                                                                                                                                           |
|                                        |    | skin development                 | 0.024 | 23 | ALDH3A2, APC, ASPRV1, CDSN, CST6, DHCR24, FGFR2, FLG, FOXQ1, KLK7, KRT27, KRT71, LAMA3, PTGS2, SMAD3, SPINK5, STS, TGFB2, TGM3, VEGFA                                                                                                                     |
|                                        |    | development of hair              | 0.031 | 4  | FGFR2, FST, SPINK5, VDR                                                                                                                                                                                                                                   |
| Embryonic Development                  | 7  | epithelialization of wound       | 0.046 | 2  | SMAD3, VEGFA                                                                                                                                                                                                                                              |
|                                        |    | invasion of embryonic cells      | 0.007 | 5  | FST, IL8, MUC1, RUNX2, SCGB1A1                                                                                                                                                                                                                            |
|                                        |    | invasion of trophoblast cells    | 0.028 | 4  | FST, IL8, MUC1, SCGB1A1                                                                                                                                                                                                                                   |
| Organismal Development                 | 87 | migration of melanoblasts        | 0.046 | 2  | EDNRB, KITLG                                                                                                                                                                                                                                              |
|                                        |    | patterning of rostrocaudal axis  | 0.010 | 14 | APC, EMX2, FOXA2, HOXA10, HOXA11, HOXA7, HOXA9, HOXB8, HOXD8, HOXD9, HOXD8, LRP6, MLL, PAX6                                                                                                                                                               |

Hui L, Wick HC, Edlow AG, Cowan JM, Bianchi DJW. Global gene expression analysis of term amniotic fluid cell-free fetal RNA. *Obstet Gynecol* 2013;121.

The authors provided this information as a supplement to their article.

|                                                      |    |                                             |       |    |                                                                                                                                                                                                                                                                                                 |
|------------------------------------------------------|----|---------------------------------------------|-------|----|-------------------------------------------------------------------------------------------------------------------------------------------------------------------------------------------------------------------------------------------------------------------------------------------------|
|                                                      |    | development of body axis                    | 0.018 | 49 | ALDH1A3, ANTXR1, APC, AQP1, AQP5, BMP2, COL4A3, CP, CSF1, CXCR4, FGFR2, FOXA2, FST, FZD5, HESX1, HIP1, HOXA10, HOXA11, HOXA7, HOXB8, HOXD3, HOXD4, HOXD8, IL8, IRX3, IRX5, ITGA3, KNG1, LAMC1, LRP6, MAPT, MITF, MLL, NFIC, NFKBIZ, PAX6, PAX9, PLG, PLXNA4, RUC1, SOD2, SP5, TGFB2, VEGFA, WT1 |
|                                                      |    | growth of organism                          | 0.033 | 37 | ABCA1, ABCC1, ACACA, ALOX15B, AQP1, AQP5, BMP2, BPIFA1, CALB1, COL4A1, CSF1, DEFB1, FGFR2, FOXA2, GRB10, HBEGF, HHIP, HIP1, HIF1A, IL1B, ITPR2, PLG, SCNN1A, SFTPD, SLC12A2, SLC34A2, SLC8A1, SMA5, SS18, STC1, SYNJ1, TF, TMPRSS2, VDR, VEGFA                                                  |
|                                                      |    | morphogenesis of embryonic tissue           | 0.038 | 14 | ALDH1A3, BMP2, CAT, CD44, EPB41L5, HOXA11, IRX3, IRX5, NTN4, SMAD3, TGFB2, WT1                                                                                                                                                                                                                  |
|                                                      |    | development of bone marrow cells            | 0.041 | 10 | CD44, CSF1, FST, HOXA10, IL6R, IL6ST, KITLG, LFNG, NQO1, SMAD3                                                                                                                                                                                                                                  |
| Renal and Urological System Development and Function | 35 | morphology of kidney                        | 0.018 | 22 | ABCA1, CD36, COL4A3, EHD3, EMX2, FGFR2, HOXA11, HSD11B2, ITGA3, NFIA, PLG, PTGS2, SALL1, SCGB1A1, SCNN1B, SIX1, SLC12A1, SLC12A2, TNS1, WT1                                                                                                                                                     |
|                                                      |    | kidney development                          | 0.028 | 23 | AGER, ALDH1A3, APC, BMP2, CAT, CD44, COL4A3, COL4A4, CSF1, CXCR4, FGFR2, HBEGF, HOXA11, LCN2, LRRK2, PTGS2, SALL1, SIX1, SLC12A1, VEGFA, WT1                                                                                                                                                    |
|                                                      |    | development of glomerular basement membrane | 0.041 | 3  | COL4A3, COL4A4, WT1                                                                                                                                                                                                                                                                             |
| Organ Morphology                                     | 34 | involution                                  | 0.019 | 8  | CD44, CEBPD, CFTR, LCN2, PLG, PTGS2, SMAD3, VDR                                                                                                                                                                                                                                                 |
|                                                      |    | morphology of gland                         | 0.038 | 28 | ABCA1, AKAP12, ALDH1A3, ARNT2, AVPR1A, CFTR, EAF2, EMX2, FGFR2, HESX1, HOXA10, HOXD3, ITPR2, LDLR, NKX2-1, NKX3-1, PLG, RASGEF1B, SMAD3, SPDEF, TFPC2L1, TGFB2, TLR2, VDR, VEGFA, WT1                                                                                                           |
|                                                      |    | destruction of lung                         | 0.046 | 2  | CSF1, SFTPD                                                                                                                                                                                                                                                                                     |
| Reproductive System                                  | 43 | whole-cell conductance of oocytes           | 0.019 | 3  | CFTR, SCNN1A, SCNN1B                                                                                                                                                                                                                                                                            |

Hui L, Wick HC, Edlow AG, Cowan JM, Bianchi DJW. Global gene expression analysis of term amniotic fluid cell-free fetal RNA. *Obstet Gynecol* 2013;121.

The authors provided this information as a supplement to their article.

|                                                       |       |                                                |                    |    |                                                                                                                                                                                                                                                       |
|-------------------------------------------------------|-------|------------------------------------------------|--------------------|----|-------------------------------------------------------------------------------------------------------------------------------------------------------------------------------------------------------------------------------------------------------|
| Development and Function                              |       | morphology of reproductive system              | 0.028              | 40 | ABCA1, ACSL4, AKAP12, ANTXR1, AQP1, C3, CABLES1, CD44, CFTR, EAF2, EMX2, ETV5, FGFR2, GAL, GJB2, GRB10, HIP1, HOXA10, HOXA11, LIFR, LRP6, MNS1, NKX2-1, NKX3-1, NUPR1, PLG, PTGS2, RHCG, RICE1, SLC12A2, SLC34A2, SLC8A1, SS18, STC1, TGFB2, VDR, WT1 |
|                                                       |       | morphology of genital organ                    | 0.039              | 30 | ABCA1, ACSL4, AKAP12, ANTXR1, AQP1, CABLES1, CD44, CFTR, EAF2, ETV5, GAL, HIP1, HOXA10, HOXA11, LFNG, LRP6, MNS1, NKX2-1, NKX3-1, PLG, PTGS2, RHCG, ROS1, SLC12A2, STC1, TGFB2, VDR, WT1                                                              |
|                                                       |       | involution of uterus                           | 0.046              | 2  | CD44, LCN2                                                                                                                                                                                                                                            |
| Connective Tissue Development and Function            | 26    | adipogenesis                                   | 0.019              | 13 | ACACA, BMP2, C3, CEBPD, FGFR2, GRB10, LPIN1, NR4A2, PDK4, PLG, THRSP, VDR                                                                                                                                                                             |
|                                                       |       | induction of connective tissue cells           | 0.041              | 3  | BMP2, IL1B, RUNX2                                                                                                                                                                                                                                     |
|                                                       |       | mineralization of fibroblast cell lines        | 0.041              | 3  | BMP2, ESRRG, SMAD3                                                                                                                                                                                                                                    |
|                                                       |       | differentiation of adipocytes                  | 0.042              | 17 | BMP2, CEBPD, ERO1L, FOXA2, IL1B, INSIG1, LPIN1, LRP6, MECOM, PDK4, RUNX2, SCD, SELENBP1, SMAD3, SOD2, VDR, WIF1                                                                                                                                       |
| Skeletal and Muscular System Development and Function | 56    | mineralization of osteoblasts                  | 0.019              | 6  | BMP2, FST, HOXA10, MGP, PTGS2, RUNX2                                                                                                                                                                                                                  |
|                                                       |       | quantity of myofiber                           | 0.023              | 5  | FST, PPARGC1A, PRSS12, SIX1, VEGFA                                                                                                                                                                                                                    |
|                                                       |       | development of vertebral column                | 0.024              | 8  | HIP1, HOXB8, HOXD8, LFNG, NFIX, PDGFC, SOX5, TGFB2                                                                                                                                                                                                    |
|                                                       |       | fusion of bone                                 | 0.028              | 11 | FGFR2, HOXA11, HOXA7, HOXA9, HOXD4, LFNG, MLL, NOV, PDGFC, SLC12A2                                                                                                                                                                                    |
|                                                       |       | colony formation of osteoclast precursor cells | 0.031              | 4  | HOXA10, HOXA9, KITLG, MLL                                                                                                                                                                                                                             |
|                                                       |       | quantity of vertebrae                          | 0.034              | 6  | FST, HOXA10, HOXA11, HOXA9, LFNG, PAX9                                                                                                                                                                                                                |
|                                                       |       | differentiation of osteoclasts                 | 0.040              | 16 | APC, BMP2, C3, CSF1, IL33, IL6ST, IL8, IRAK3, MITF, PDK4, PTGS2, RICE1, SMAD3, TF, TLR2, VEGFA                                                                                                                                                        |
|                                                       |       | synthesis of cartilage matrix                  | 0.040              | 4  | BMP2, IL1B, STC1, TLR2                                                                                                                                                                                                                                |
| angiogenesis of bone                                  | 0.041 | 3                                              | BMP2, TGFB2, VEGFA |    |                                                                                                                                                                                                                                                       |

Hui L, Wick HC, Edlow AG, Cowan JM, Bianchi DJW. Global gene expression analysis of term amniotic fluid cell-free fetal RNA. *Obstet Gynecol* 2013;121.

The authors provided this information as a supplement to their article.



|                                           |     |                                         |       |     |                                                                                                                                                                                                                                                                                                                                                                                                                                                                                                                                                                                                                                               |
|-------------------------------------------|-----|-----------------------------------------|-------|-----|-----------------------------------------------------------------------------------------------------------------------------------------------------------------------------------------------------------------------------------------------------------------------------------------------------------------------------------------------------------------------------------------------------------------------------------------------------------------------------------------------------------------------------------------------------------------------------------------------------------------------------------------------|
|                                           |     | morphology of skeletal system           | 0.049 | 37  | ANTXR1, CALB1, CSF1, EMX2, EYA4, FGFR2, FOXA2, HOXA10, HOXA11, HOXB8, HOXD3, HOXD4, IL6ST, IRAK3, ITGA3, LFNG, LIFR, MGP, MLL, NKX2-1, NOV, PAX9, PDK4, RIMS1, RUNX2, SALL1, SIM2, SIX1, SLC4A1, SOX5, TGFB2, VDR, VEGFA                                                                                                                                                                                                                                                                                                                                                                                                                      |
| Nervous System Development and Function   | 24  | development of diencephalon             | 0.026 | 6   | ARNT2, LRP6, NCOR1, NRP2, PAX6, SIM2                                                                                                                                                                                                                                                                                                                                                                                                                                                                                                                                                                                                          |
|                                           |     | excitation of neurons                   | 0.028 | 8   | CCL22, GAL, HSD11B2, IL1B, KNG1, LCN2, PPP1R1B, SLC12A2                                                                                                                                                                                                                                                                                                                                                                                                                                                                                                                                                                                       |
|                                           |     | development of pallium                  | 0.041 | 3   | EMX1, EMX2, PAX6                                                                                                                                                                                                                                                                                                                                                                                                                                                                                                                                                                                                                              |
|                                           |     | quantity of synaptic vesicles           | 0.041 | 6   | ABCA1, FGFR2, KIF1B, MAP6, RIMS1, UNC13B                                                                                                                                                                                                                                                                                                                                                                                                                                                                                                                                                                                                      |
|                                           |     | extension of parallel fiber             | 0.046 | 2   | NFIA, NFIX                                                                                                                                                                                                                                                                                                                                                                                                                                                                                                                                                                                                                                    |
| Tissue Morphology                         | 112 | abnormal morphology of membrane tissue  | 0.033 | 16  | ABCC4, BIRC3, CD36, CFTR, CXADR, IL6ST, LDLR, MECOM, PTGS2, SLC8A1, SMAD3, SPDEF, TFF1, TFF2, VDR                                                                                                                                                                                                                                                                                                                                                                                                                                                                                                                                             |
|                                           |     | quantity of stem cells                  | 0.038 | 7   | CSF1, EDNRB, IL6ST, IL8, IRX3, KITLG, VEGFA                                                                                                                                                                                                                                                                                                                                                                                                                                                                                                                                                                                                   |
|                                           |     | permeability of epithelial tissue       | 0.040 | 4   | AQP1, IL1B, IL8, VEGFA                                                                                                                                                                                                                                                                                                                                                                                                                                                                                                                                                                                                                        |
|                                           |     | diameter of tumor tissue                | 0.046 | 2   | APC, MMP7                                                                                                                                                                                                                                                                                                                                                                                                                                                                                                                                                                                                                                     |
|                                           |     | healing of wound                        | 0.046 | 16  | AQP1, CD44, CNN2, FST, HBEGF, HOXD3, IL6R, MMP7, PLG, PTGS2, SMAD3, TFF1, TGFB2, VEGFA                                                                                                                                                                                                                                                                                                                                                                                                                                                                                                                                                        |
|                                           |     | quantity of cells                       | 0.046 | 103 | ABCA1, AGER, AQP1, AVPR1A, BIRC3, BMP2, C3, CALB1, CAT, CCL22, CD74, CFTR, CHI3L1, CNN2, COL4A3, CP, CSF1, CXCL14, CXCL2, DOT1L, EMX2, FGFR2, FST, GAL, GJB6, HBEGF, HESX1, HIP1, HIVEP3, HLA-DQA1, HLA-DQB1, HLA-DRB1, HOXA10, HOXA9, HSD11B2, IGFBP7, IL13, IL33, IL5RA, IL6R, IL6ST, IL8, IRAK3, IRX3, KIF1B, KITLG, KNG1, LAMC1, LDLR, LFNG, LIFR, MAPT, MECOM, MLL, MMP7, MUC1, NCOR1, NFIA, NKX3-1, NQO1, NR4A2, NRP2, PAX6, PDCD6, PDGFC, PDK4, PIGR, PIP2, PPARGC1A, PRF1, PRSS12, PTGS2, PTPN13, RASGRF1, RIMS1, RORC, SFTPD, SIX1, SLC12A2, SLC4A4, SLC8A1, SLC01A2, SMAD3, SOD2, STC1, TEC, TF, TFF2, TGFB2, TLR2, VDR, VEGFA, WT1 |
| Lymphoid Tissue Structure and Development | 20  | lack of thymus gland                    | 0.041 | 3   | HOXD3, SIX1, VEGFA                                                                                                                                                                                                                                                                                                                                                                                                                                                                                                                                                                                                                            |
|                                           |     | proliferation of lymphatic system cells | 0.046 | 18  | BMP2, CD44, CHI3L1, CSF1, CYSLTR1, EDNRB, FGFR2, HOXA10, HOXD3, KITLG, PRF1, SMAD3, TGFB2, TLR2, VDR, VEGFA                                                                                                                                                                                                                                                                                                                                                                                                                                                                                                                                   |

Hui L, Wick HC, Edlow AG, Cowan JM, Bianchi DJW. Global gene expression analysis of term amniotic fluid cell-free fetal RNA. *Obstet Gynecol* 2013;121.

The authors provided this information as a supplement to their article.

|                                             |    |                                                   |       |   |                                           |
|---------------------------------------------|----|---------------------------------------------------|-------|---|-------------------------------------------|
| Respiratory System Development and Function | 16 | function of respiratory system                    | 0.041 | 7 | AQP1, AQP4, AQP5, CFTR, CHRM3, HAS3, TLR2 |
|                                             |    | production of alveolar epithelial lamellar bodies | 0.046 | 2 | SFTPB, VEGFA                              |
|                                             |    | proliferation of lung cell lines                  | 0.049 | 7 | CAT, EHF, NFIX, NKX2-1, PAX9, SOD2, TGFB2 |

Hui L, Wick HC, Edlow AG, Cowan JM, Bianchi DJW. Global gene expression analysis of term amniotic fluid cell-free fetal RNA. *Obstet Gynecol* 2013;121.

The authors provided this information as a supplement to their article.

Type of file: table

Label: 4

Filename: AOG203121-13-31R1 Appendix 5 (3-22-13v1) clean.pdf

Appendix 5.IPA: Significant Molecular and Cellular Functions in Term Amniotic Fluid Cell-Free Fetal RNA

| <b>Category</b>                        | <b>Number of genes</b> |
|----------------------------------------|------------------------|
| Carbohydrate Metabolism                | 41                     |
| Cellular Movement                      | 139                    |
| Lipid Metabolism                       | 93                     |
| Cellular Development                   | 76                     |
| Cellular Growth and Proliferation      | 203                    |
| Cell-To-Cell Signaling and Interaction | 71                     |
| Molecular Transport                    | 59                     |
| Cellular Function and Maintenance      | 93                     |
| Cell Morphology                        | 103                    |
| Free Radical Scavenging                | 34                     |
| Vitamin and Mineral Metabolism         | 9                      |
| Gene Expression                        | 3                      |

Type of file: table

Label: 5

Filename: AOG203121-13-31R1 Appendix 6 (3-22-13v1) clean.pdf

Appendix 6. IPA: Upstream Regulators Activated in Term Amniotic Fluid

| <b>Upstream Regulator</b> | <b>Name</b>                                          | <b>Function</b>                                                                                                                                                                                                                                                                            | <b>Fold Change</b> | <b>Bias-corrected z score</b> | <b>No. of target genes</b> |
|---------------------------|------------------------------------------------------|--------------------------------------------------------------------------------------------------------------------------------------------------------------------------------------------------------------------------------------------------------------------------------------------|--------------------|-------------------------------|----------------------------|
| <i>IL8</i>                | interleukin 8                                        | This chemokine is one of the major mediators of the inflammatory response. IL-8 is a chemotactic factor that attracts neutrophils, basophils, and T-cells, but not monocytes. It is also involved in neutrophil activation.                                                                | 47.5               | 2.2                           | 9                          |
| <i>IL1B</i>               | interleukin 1, beta                                  | This cytokine is an important mediator of the inflammatory response. Produced by activated macrophages, IL-1 stimulates thymocyte proliferation by inducing IL-2 release, B-cell maturation and proliferation, and fibroblast growth factor activity.                                      | 27.6               | 3.9                           | 150                        |
| <i>AGER</i>               | advanced glycosylation end product-specific receptor | The receptor encoded by this gene is a member of the immunoglobulin superfamily of cell surface receptors; implicated in homeostasis, development, and inflammation, and certain diseases                                                                                                  | 26.3               | 3.0                           | 13                         |
| <i>NKX2-1</i>             | NK2 homeobox 1                                       | Transcription factor that binds and activates the promoter of thyroid specific genes such as thyroglobulin, thyroperoxidase, and thyrotropin receptor. Crucial in the maintenance of the thyroid differentiation phenotype. May play a role in lung development and surfactant homeostasis | 7.7                | 2.1                           | 41                         |

Hui L, Wick HC, Edlow AG, Cowan JM, Bianchi DJW. Global gene expression analysis of term amniotic fluid cell-free fetal RNA. *Obstet Gynecol* 2013;121.

The authors provided this information as a supplement to their article.

|              |                                      |                                                                                                                                                                                                                            |     |     |    |
|--------------|--------------------------------------|----------------------------------------------------------------------------------------------------------------------------------------------------------------------------------------------------------------------------|-----|-----|----|
| <i>VEGFA</i> | vascular endothelial growth factor A | Growth factor active in angiogenesis, vasculogenesis and endothelial cell growth. Induces endothelial cell proliferation, promotes cell migration, inhibits apoptosis and induces permeabilization of blood vessels.       | 7.2 | 2.3 | 42 |
| <i>C3</i>    | complement component 3               | Complement component C3 plays a central role in the activation of complement system. Its activation is required for both classical and alternative complement activation pathways.                                         | 6.8 | 2.5 | 6  |
| <i>IL6R</i>  | interleukin 6 receptor               | This gene encodes a subunit of the interleukin 6 (IL6) receptor complex. Interleukin 6 is a potent pleiotropic cytokine that regulates cell growth and differentiation and plays an important role in the immune response. | 6.5 | 2.1 | 14 |
| <i>RUNX2</i> | runt-related transcription factor 2  | Transcription factor involved in osteoblastic differentiation and skeletal morphogenesis. Essential for the maturation of osteoblasts and both intramembranous and endochondral ossification.                              | 4.1 | 2.1 | 20 |
| <i>CD24</i>  | CD24 molecule                        | This gene encodes a sialoglycoprotein that is expressed on mature granulocytes and in many B cells. Modulates B-cell activation responses.                                                                                 | 3.7 | 2.7 | 35 |
| <i>PRKCD</i> | protein kinase C, delta              | this kinase is involved in B cell signaling and in the regulation of growth, apoptosis, and differentiation of a variety of cell types                                                                                     | 2.9 | 2.6 | 18 |

Hui L, Wick HC, Edlow AG, Cowan JM, Bianchi DJW. Global gene expression analysis of term amniotic fluid cell-free fetal RNA. *Obstet Gynecol* 2013;121.

The authors provided this information as a supplement to their article.

|               |                                                                      |                                                                                                                                                                                                                                                                                                                                                                       |     |     |    |
|---------------|----------------------------------------------------------------------|-----------------------------------------------------------------------------------------------------------------------------------------------------------------------------------------------------------------------------------------------------------------------------------------------------------------------------------------------------------------------|-----|-----|----|
| <i>RAD21</i>  | RAD21 homolog ( <i>S. pombe</i> )                                    | Cleavable component of the cohesin complex, involved in chromosome cohesion during cell cycle, in DNA repair, and in apoptosis. The cohesin complex is required for the cohesion of sister chromatids after DNA replication.                                                                                                                                          | 2.6 | 2.1 | 4  |
| <i>NAMPT</i>  | nicotinamide phosphoribosyltransferase                               | Catalyzes the condensation of nicotinamide with 5-phosphoribosyl-1-pyrophosphate to yield nicotinamide mononucleotide, an intermediate in the biosynthesis of NAD. It is the rate limiting component in the mammalian NAD biosynthesis pathway. It is thought to be involved in many important biological processes, including metabolism, stress response and aging. | 2.4 | 2.5 | 6  |
| <i>BNIP3L</i> | BCL2/adenovirus E1B 19kDa interacting protein 3-like                 | The protein encoded by this gene is a functional homolog of BNIP3, a proapoptotic protein. Interacts with viral and cellular anti-apoptosis proteins. May function as a tumor suppressor.                                                                                                                                                                             | 2.4 | 2.3 | 12 |
| <i>NFKB1</i>  | nuclear factor of kappa light polypeptide gene enhancer in B-cells 1 | NF-kappa-B is a transcription factor which is present in almost all cell types and is involved in many biological processes such as inflammation, immunity, differentiation, cell growth, tumorigenesis and apoptosis.                                                                                                                                                | 2.4 | 2.1 | 40 |

Hui L, Wick HC, Edlow AG, Cowan JM, Bianchi DJW. Global gene expression analysis of term amniotic fluid cell-free fetal RNA. *Obstet Gynecol* 2013;121.

The authors provided this information as a supplement to their article.



|               |                                           |                                                                                                                                                                                                                                                                                                                                                                                   |     |     |    |
|---------------|-------------------------------------------|-----------------------------------------------------------------------------------------------------------------------------------------------------------------------------------------------------------------------------------------------------------------------------------------------------------------------------------------------------------------------------------|-----|-----|----|
| <i>S100A9</i> | S100 calcium binding protein A9           | Calcium-binding protein. Has antimicrobial activity towards bacteria and fungi. Important for resistance to invasion by pathogenic bacteria. Up-regulates transcription of genes that are under the control of NF-kappa-B. Plays a role as a pro-inflammatory mediator in acute and chronic inflammation and up-regulates the release of IL8 and cell-surface expression of ICAM1 | 1.8 | 2.1 | 5  |
| <i>SMC3</i>   | structural maintenance of chromosomes 3   | Central component of cohesin, a complex required for chromosome cohesion during the cell cycle.                                                                                                                                                                                                                                                                                   | 1.7 | 2.2 | 4  |
| <i>MAP2K3</i> | mitogen-activated protein kinase kinase 3 | Activated by mitogenic and environmental stress, and participates in the MAP kinase-mediated signaling cascade. This kinase can be activated by insulin, and is necessary for the expression of glucose transporter.                                                                                                                                                              | 1.7 | 2.2 | 10 |

Hui L, Wick HC, Edlow AG, Cowan JM, Bianchi DJW. Global gene expression analysis of term amniotic fluid cell-free fetal RNA. *Obstet Gynecol* 2013;121.

The authors provided this information as a supplement to their article.

Type of file: table

Label: 6

Filename: AOG203121-13-31R1 Appendix 7 (3-22-13v1) clean.pdf

Appendix 7. IPA: Upstream Regulators Activated in Second Trimester Amniotic Fluid

| <b>Upstream Regulator</b> | <b>Name</b>                                                | <b>Function</b>                                                                                                                                                                                                                                            | <b>Fold Change</b> | <b>Bias-corrected z score</b> | <b>No. of target genes</b> |
|---------------------------|------------------------------------------------------------|------------------------------------------------------------------------------------------------------------------------------------------------------------------------------------------------------------------------------------------------------------|--------------------|-------------------------------|----------------------------|
| <i>HNF4A</i>              | hepatocyte nuclear factor 4, alpha                         | Transcriptionally controlled transcription factor. Binds to DNA sites required for the transcription of alpha 1-antitrypsin, apolipoprotein CIII, transthyretin genes and HNF1-alpha. May be essential for development of the liver, kidney and intestine. | 388.7              | 4.8                           | 316                        |
| <i>NR1H4</i>              | nuclear receptor subfamily 1, group H, member 4            | This gene encodes a ligand-activated transcription factor. This protein functions as a receptor for bile acids, and when bound to bile acids, regulates the expression of genes involved in bile acid synthesis and transport.                             | 51.8               | 2.4                           | 24                         |
| <i>MYBL2</i>              | v-myb myeloblastosis viral oncogene homolog (avian)-like 2 | Member of the MYB family of transcription factor genes, involved in cell cycle progression, regulation of cell survival, proliferation, and differentiation.                                                                                               | 15.6               | 2.3                           | 17                         |
| <i>DIO3</i>               | deiodinase, iodothyronine, type III                        | Catalyzes the inactivation of thyroid hormone to inactive metabolites. Regulates circulating fetal thyroid hormone concentrations throughout gestation to prevent premature exposure of developing fetal tissues to adult levels of thyroid hormones.      | 2.5                | 2.4                           | 9                          |
| <i>GPX1</i>               | glutathione peroxidase 1                                   | Glutathione peroxidase functions in the detoxification of hydrogen peroxide, and is one of the most important antioxidant enzymes in humans. Protects the hemoglobin in erythrocytes from oxidative breakdown.                                             | 1.8                | 2.4                           | 7                          |

Hui L, Wick HC, Edlow AG, Cowan JM, Bianchi DJW. Global gene expression analysis of term amniotic fluid cell-free fetal RNA. *Obstet Gynecol* 2013;121.

The authors provided this information as a supplement to their article.

|              |           |                                                                                                                                                                                                                                                                             |     |     |    |
|--------------|-----------|-----------------------------------------------------------------------------------------------------------------------------------------------------------------------------------------------------------------------------------------------------------------------------|-----|-----|----|
| <i>CCND1</i> | cyclin D1 | Cyclins function as regulators of CDK kinases. This cyclin forms a complex with and functions as a regulatory subunit of CDK4 or CDK6, whose activity is required for cell cycle G1/S transition. This protein has been shown to interact with tumor suppressor protein Rb. | 1.7 | 2.5 | 47 |
|--------------|-----------|-----------------------------------------------------------------------------------------------------------------------------------------------------------------------------------------------------------------------------------------------------------------------------|-----|-----|----|

Hui L, Wick HC, Edlow AG, Cowan JM, Bianchi DJW. Global gene expression analysis of term amniotic fluid cell-free fetal RNA. *Obstet Gynecol* 2013;121.

The authors provided this information as a supplement to their article.

Type of file: table

Label: 7

Filename: AOG203121-13-31R1 Appendix 3 (3-22-13v3) clean.pdf

Appendix 3. Top 10 Upregulated Gene Transcripts in Second Trimester Amniotic Fluid

| Symbol         | Gene Name                                                                           | Gene Function                                                                                                                                                                                                        | Tissue Specificity*                                | Fold Change | Benjamini-Hochberg <i>P</i> |
|----------------|-------------------------------------------------------------------------------------|----------------------------------------------------------------------------------------------------------------------------------------------------------------------------------------------------------------------|----------------------------------------------------|-------------|-----------------------------|
| <i>RBP2</i>    | retinol binding protein 2, cellular                                                 | Intracellular transport of retinol                                                                                                                                                                                   | NA                                                 | 1215.2      | < 1 x 10 <sup>-15</sup>     |
| <i>APOC3</i>   | apolipoprotein C-III                                                                | Apolipoprotein C-III is a very low density lipoprotein (VLDL) protein. APOC3 inhibits lipoprotein lipase and hepatic lipase; it is thought to delay catabolism of triglyceride-rich particles.                       | Liver > 30 MoM                                     | 754.7       | < 1 x 10 <sup>-15</sup>     |
| <i>FABP1</i>   | fatty acid binding protein 1, liver                                                 | This gene encodes the fatty acid binding protein found in liver. FABP's roles include fatty acid uptake, transport, and metabolism                                                                                   | Fetal liver, adult colon, small intestine > 10 MoM | 653.6       | < 1 x 10 <sup>-15</sup>     |
| <i>APOA2</i>   | apolipoprotein A-II                                                                 | This gene encodes apolipoprotein A-II, which is the second most abundant protein of the high density lipoprotein particles.                                                                                          | Fetal liver, adult liver > 30 MoM                  | 461.0       | < 1 x 10 <sup>-15</sup>     |
| <i>ANXA13</i>  | annexin A13                                                                         | Annexins play a role in the regulation of cellular growth and in signal transduction pathways. This gene is associated with undifferentiated, proliferating endothelial cells and differentiated villus enterocytes. | Small intestine > 10 MoM                           | 411.9       | < 8.12 x 10 <sup>-10</sup>  |
| <i>SULT2A1</i> | sulfotransferase family, cytosolic, 2A, dehydroepiandrosterone preferring, member 1 | Catalyzes the sulfation of steroids and bile acids in the liver and adrenal glands                                                                                                                                   | Adrenal gland > 10 MoM                             | 354.5       | < 1 x 10 <sup>-15</sup>     |
| <i>CDHR5</i>   | cadherin-related family member 5                                                    | Acts as a calcium-dependent cell adhesion protein                                                                                                                                                                    | Liver > 30 MoM                                     | 304.8       | < 1 x 10 <sup>-15</sup>     |

Hui L, Wick HC, Edlow AG, Cowan JM, Bianchi DJW. Global gene expression analysis of term amniotic fluid cell-free fetal RNA. *Obstet Gynecol* 2013;121.

The authors provided this information as a supplement to their article.

|              |                                    |                                                                                                                 |                                            |       |                       |
|--------------|------------------------------------|-----------------------------------------------------------------------------------------------------------------|--------------------------------------------|-------|-----------------------|
| <i>DABI</i>  | disabled homolog 1<br>(Drosophila) | Adapter molecule functioning in neural development                                                              | Not organ specific                         | 298.2 | $1.0 \times 10^{-4}$  |
| <i>MUC13</i> | mucin 13, cell surface associated  | Epithelial and hemopoietic transmembrane mucin that may play a role in cell signaling                           | Pancreas, small intestine > 10 MoM         | 237.0 | $< 1 \times 10^{-15}$ |
| <i>APOC2</i> | apolipoprotein C-II                | Component of the very low density lipoprotein fraction in plasma; activator of several triacylglycerol lipases. | Adult liver > 30 MoM; fetal liver > 10 MoM | 206.3 | $< 1 \times 10^{-15}$ |

MoM, multiples of the median; NA, not applicable.

Gene functions obtained from public databases (UniProtKB available at [www.uniprot.org](http://www.uniprot.org) and Entrez Gene available at [www.ncbi.nlm.nih.gov/gene](http://www.ncbi.nlm.nih.gov/gene)). The information has been modified from the source due to space limitations.

\*Tissue specificity as mapped in the BioGPS gene expression atlas (<http://biogps.gnf.org>).
